# Supplementary material for: DNA-encoded chemical libraries yield non-covalent and non-peptidic SARS-CoV-2 main protease inhibitors
Source: PubMed Central journal article supplement (PMC10403511; doi:10.1038/s42004-023-00961-y), 2023-08-04

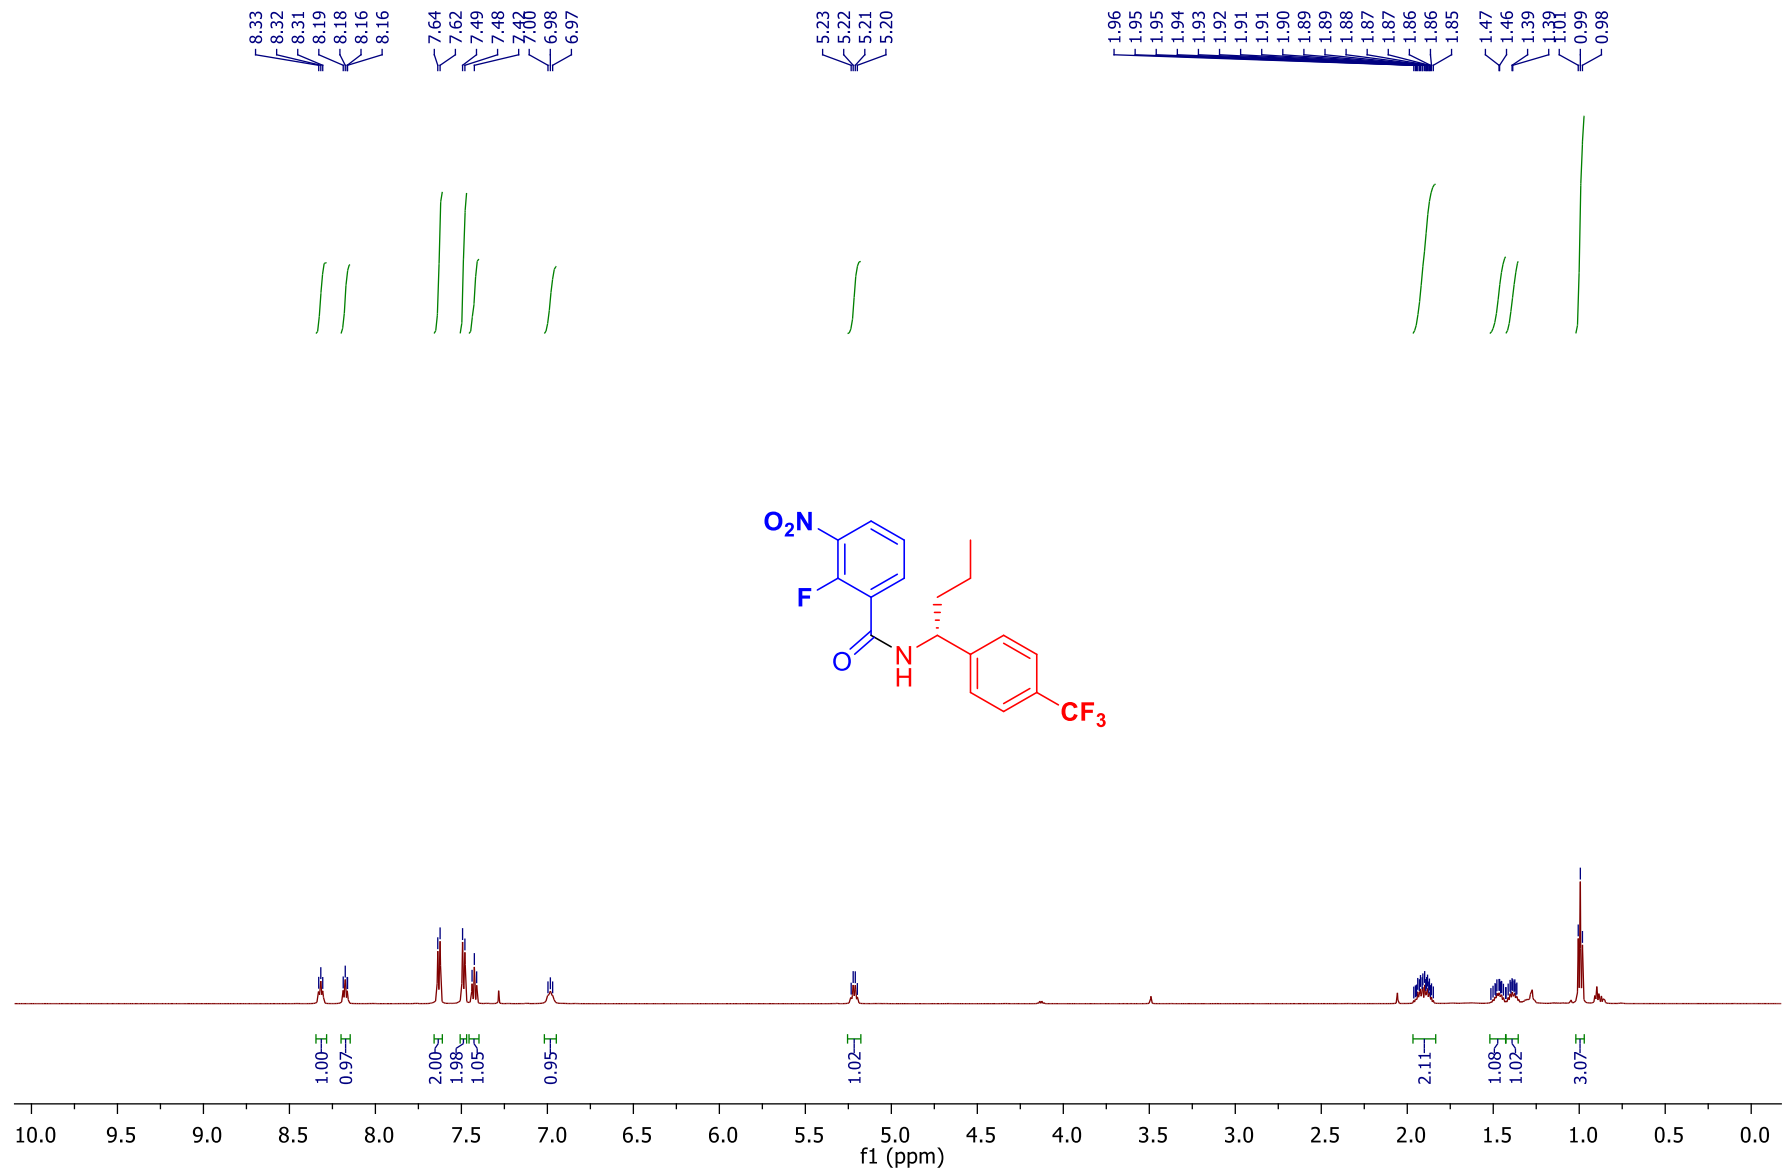

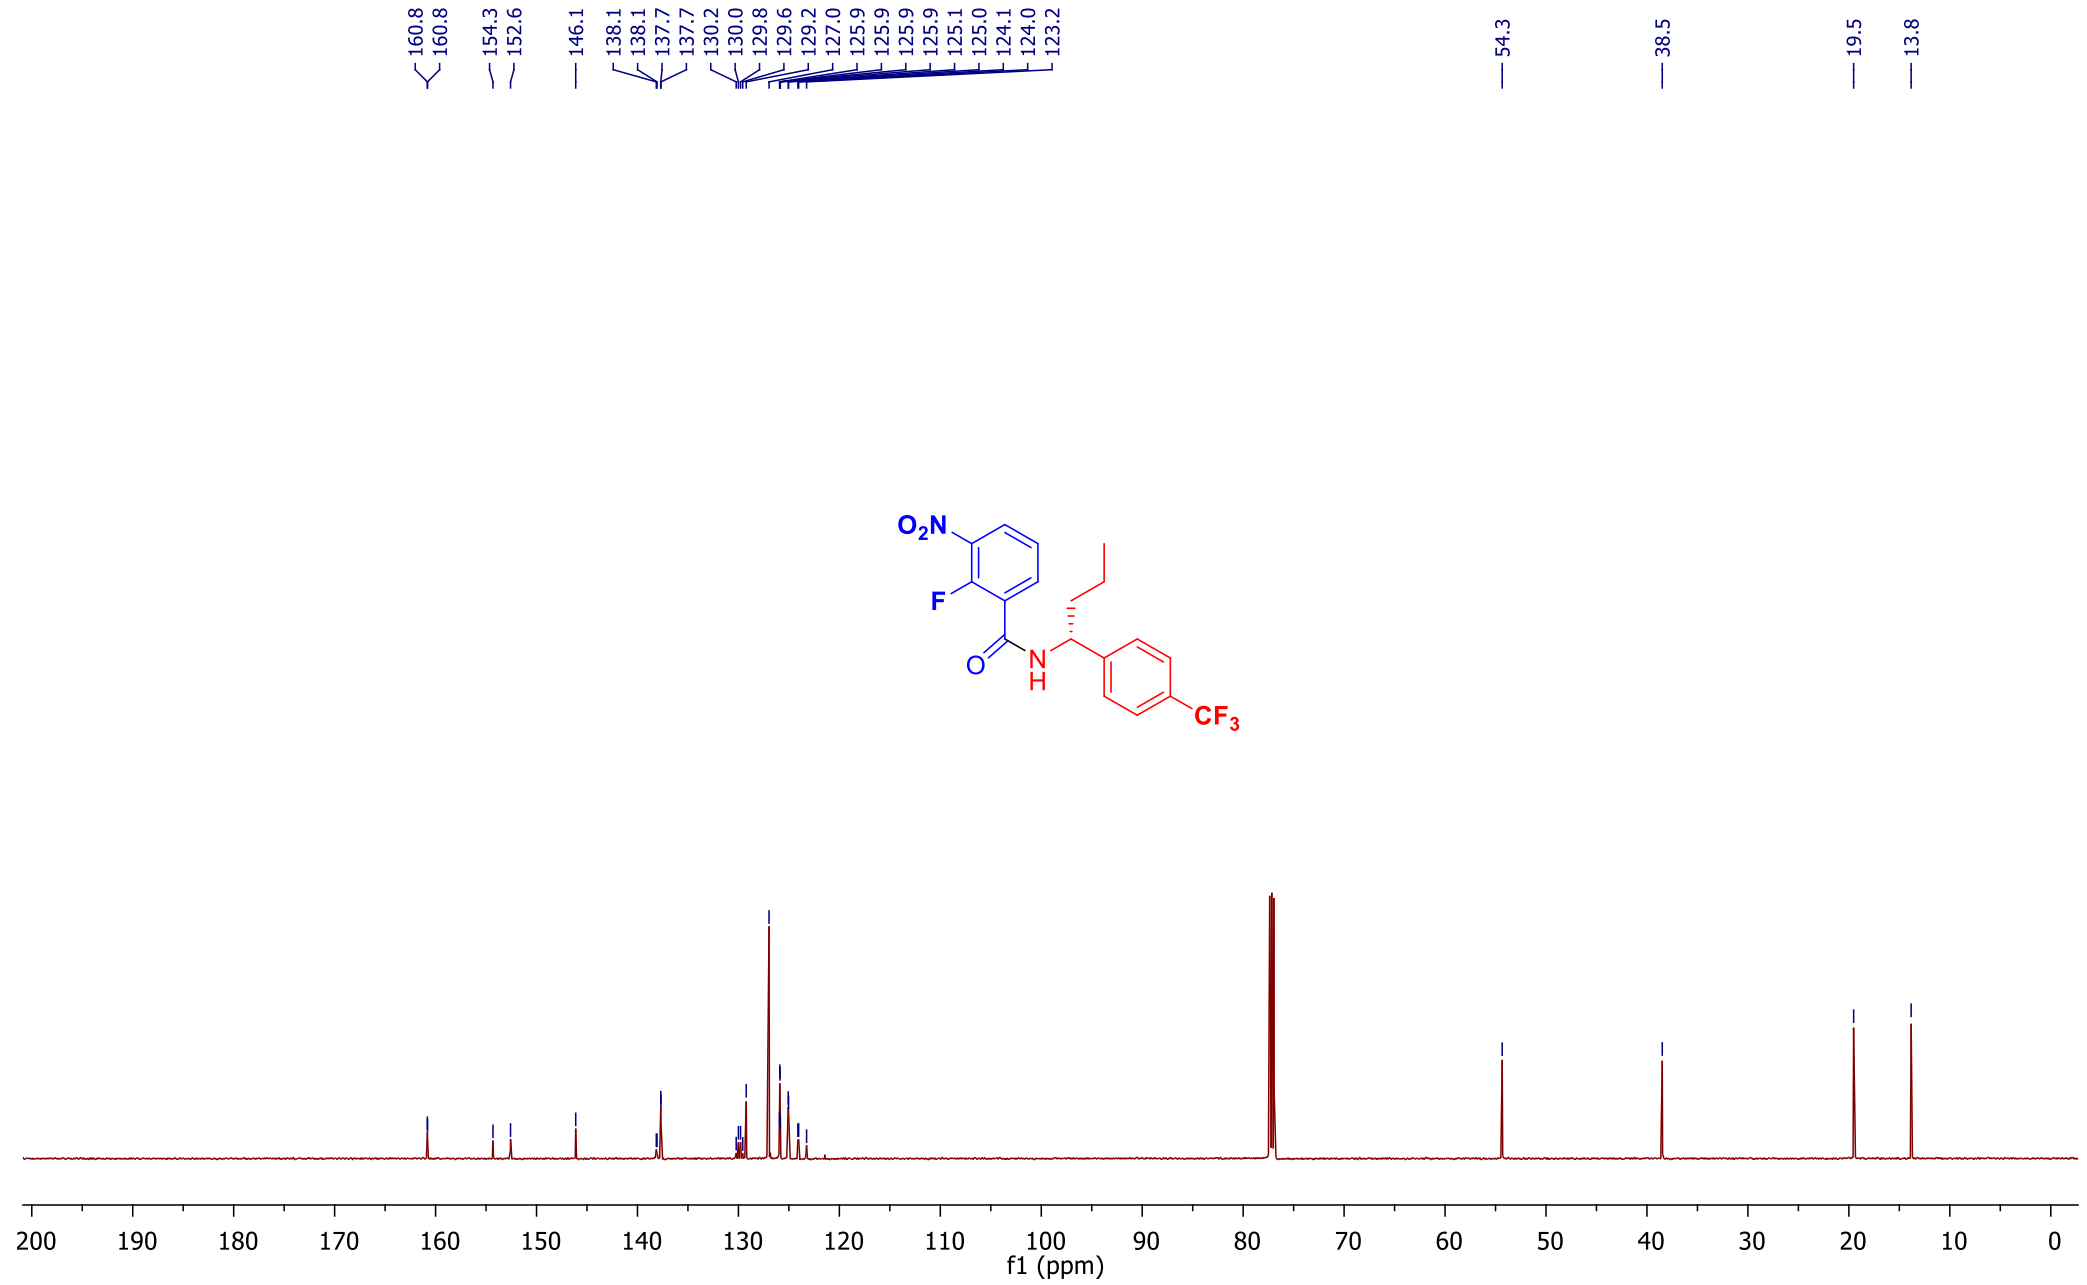

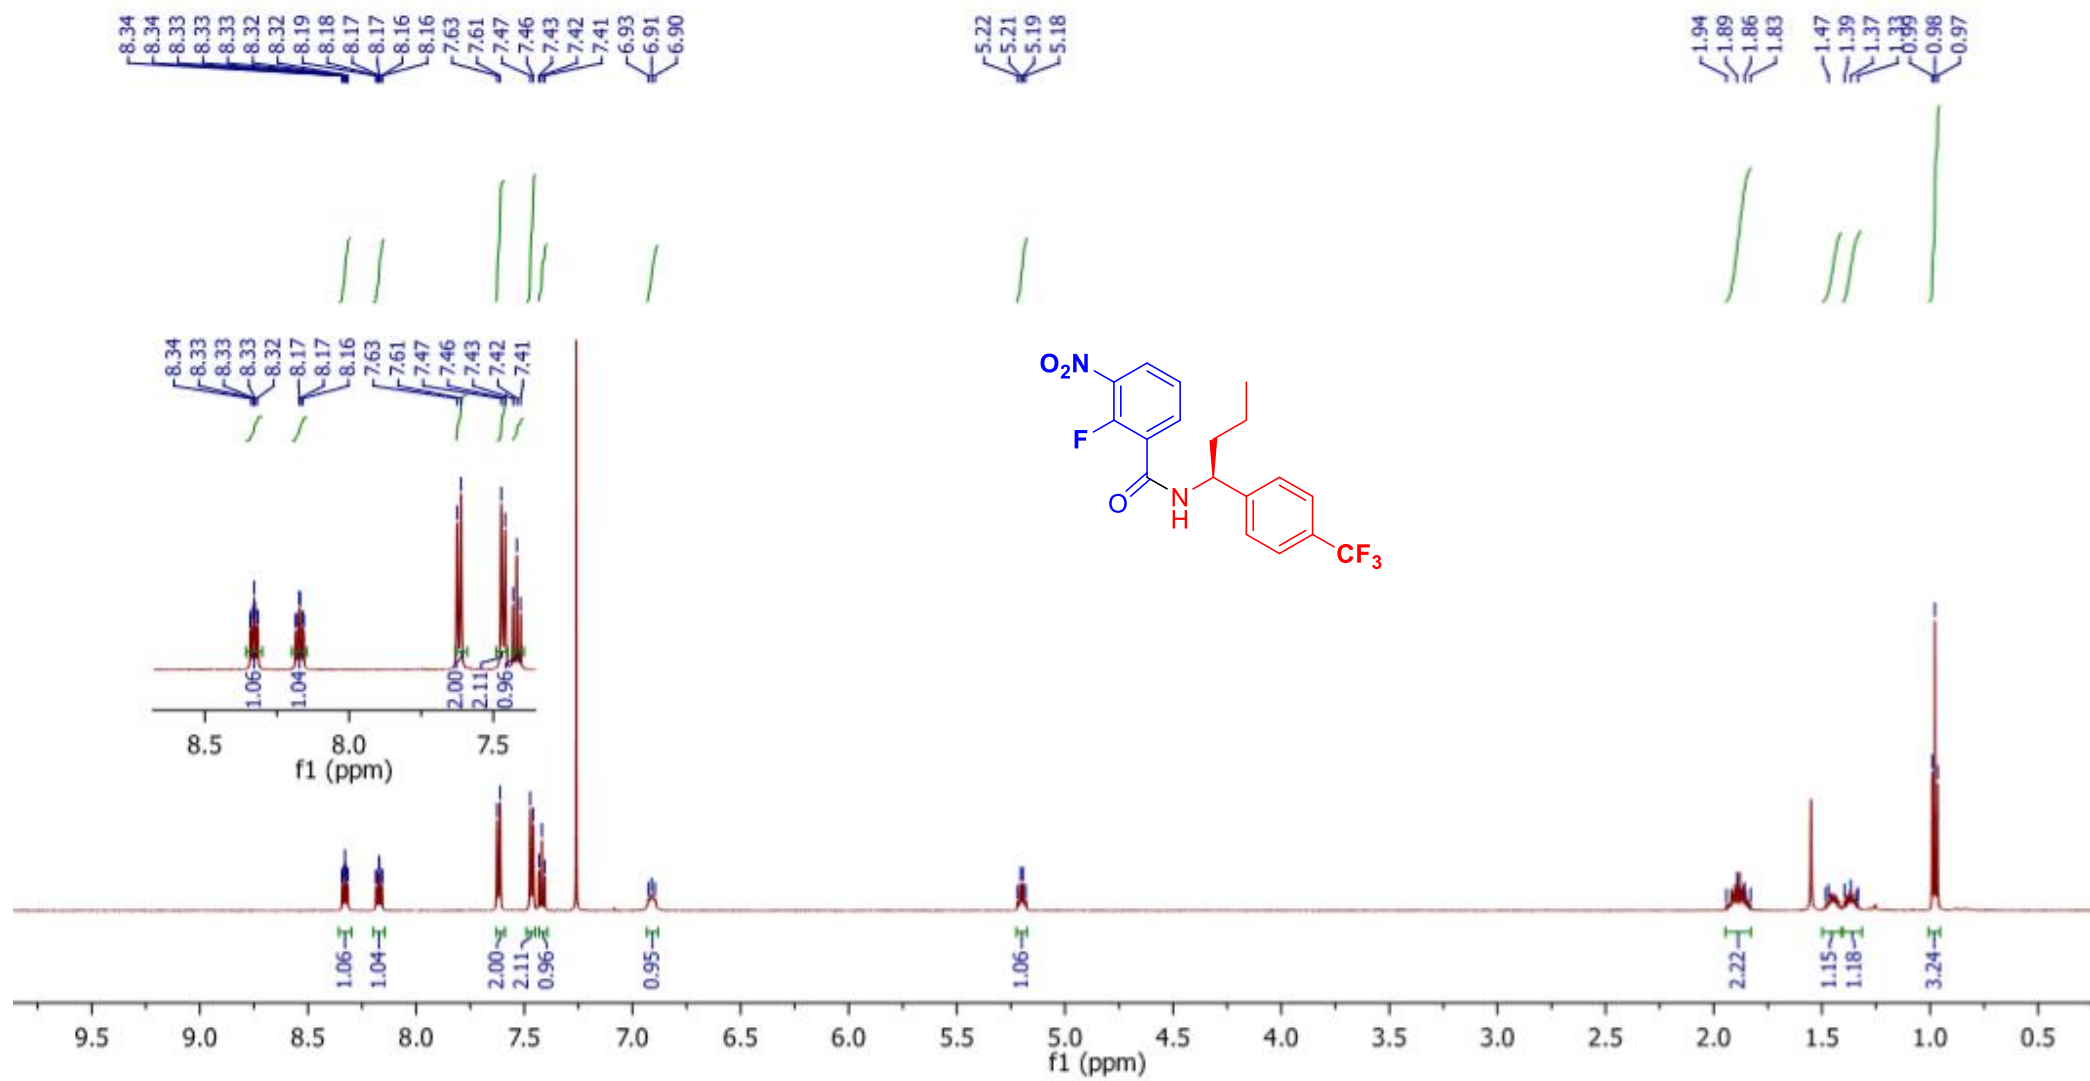

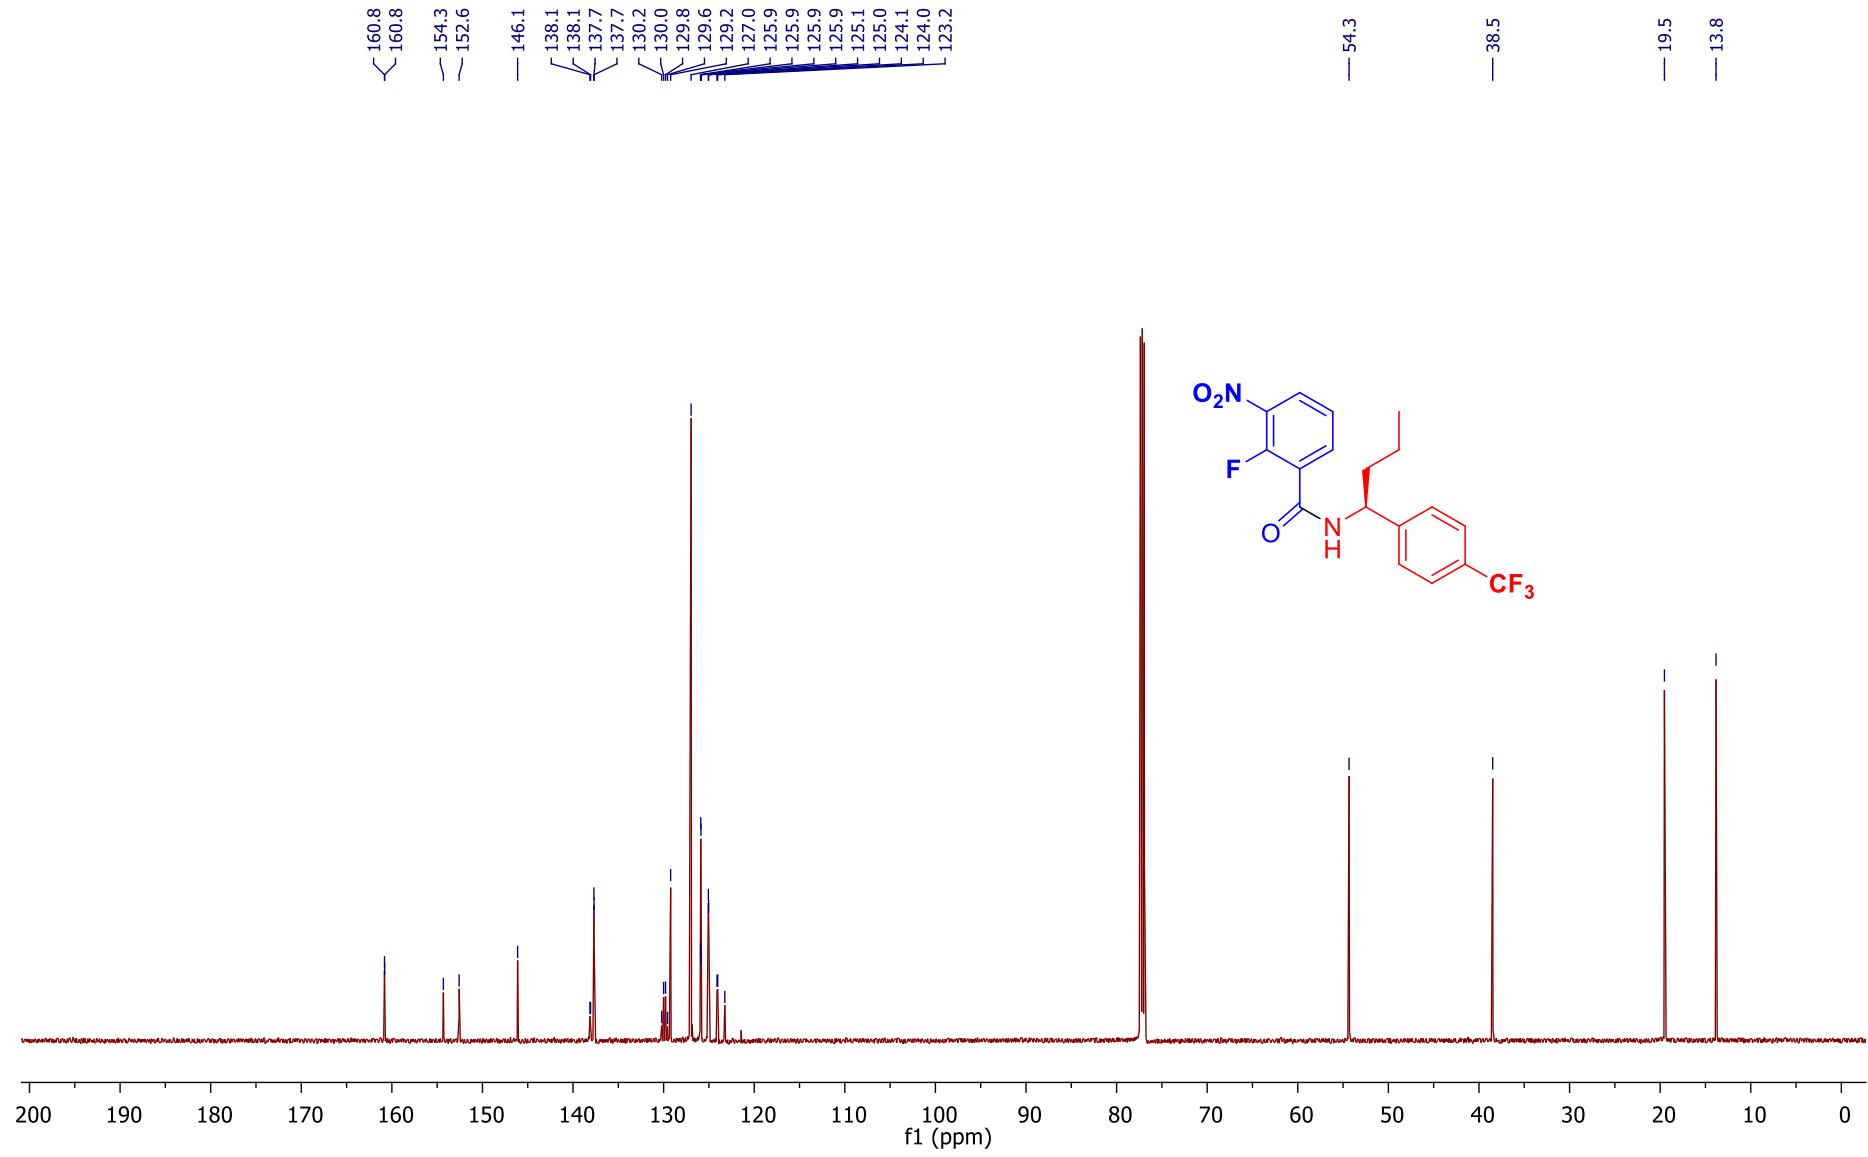

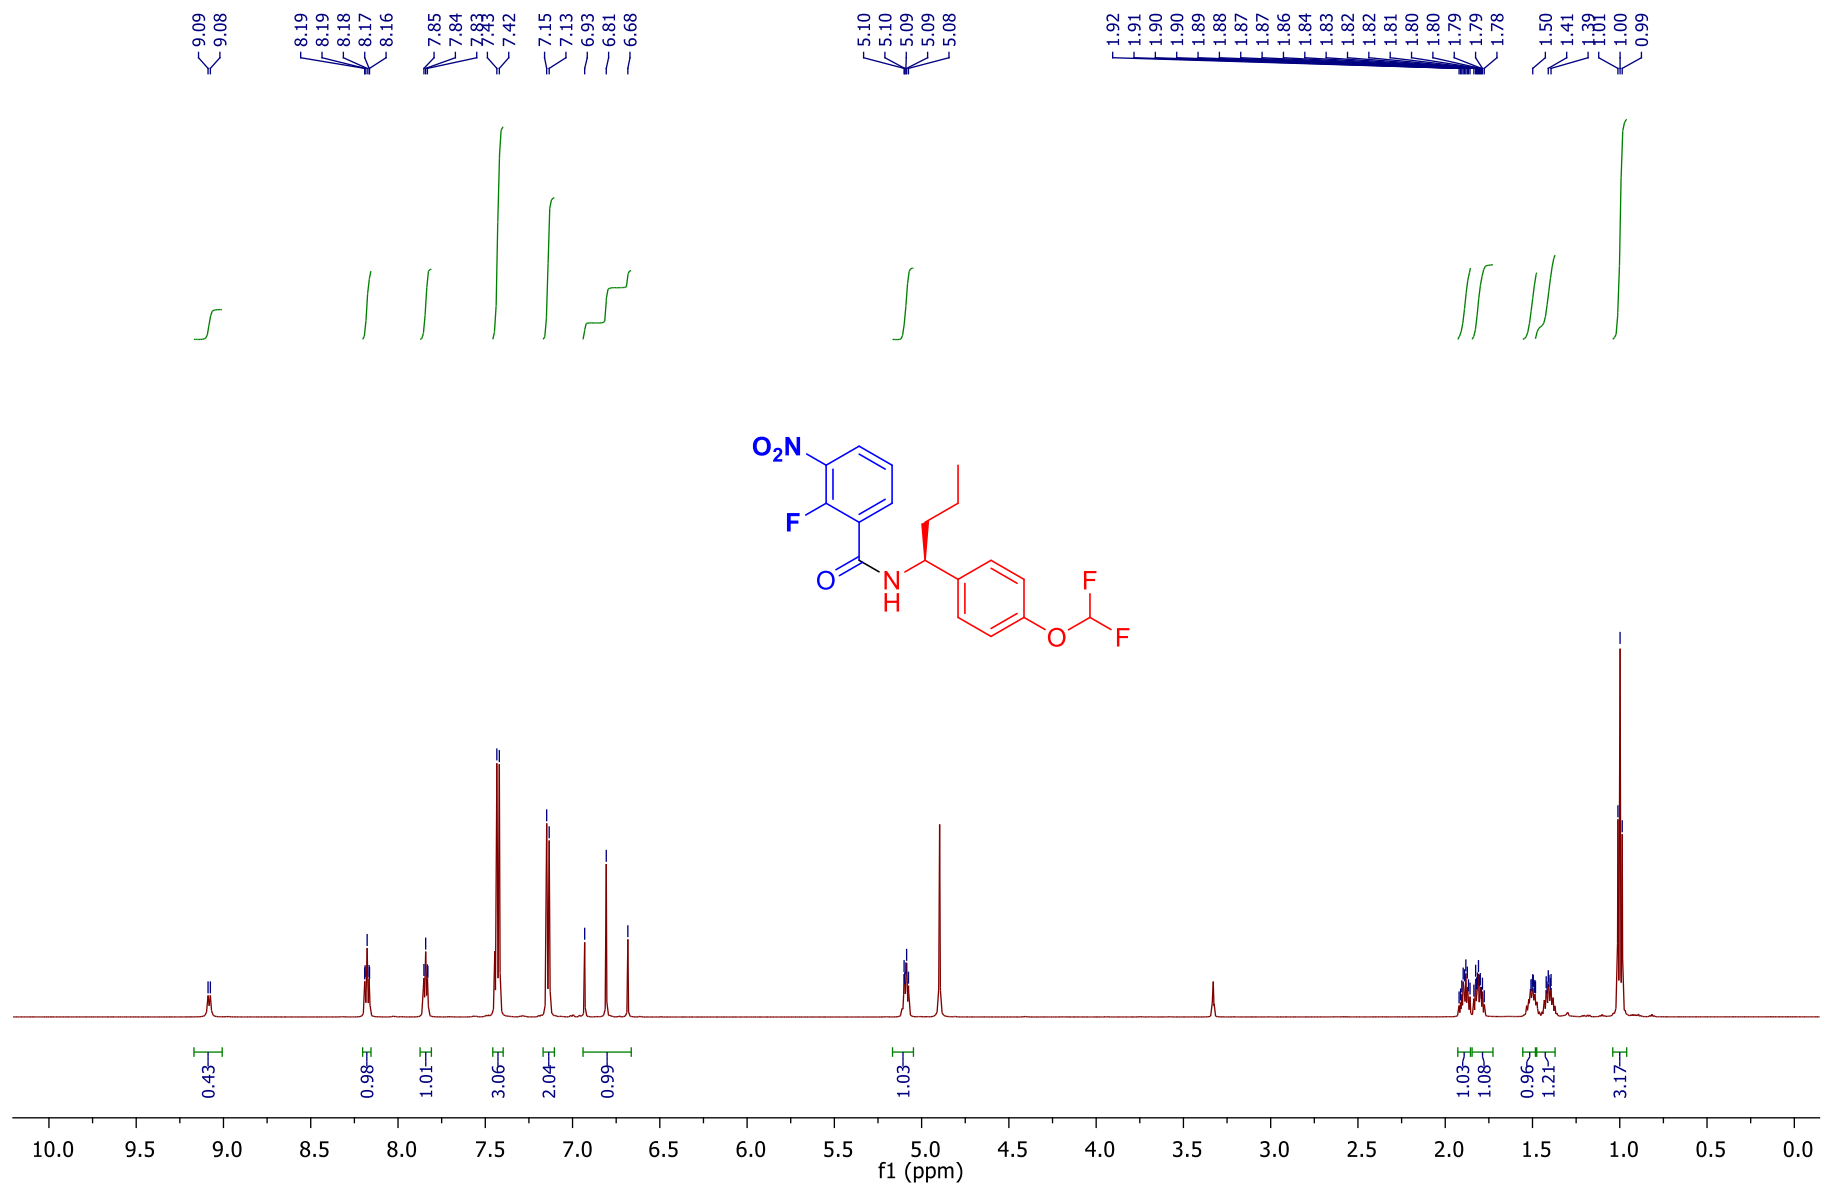

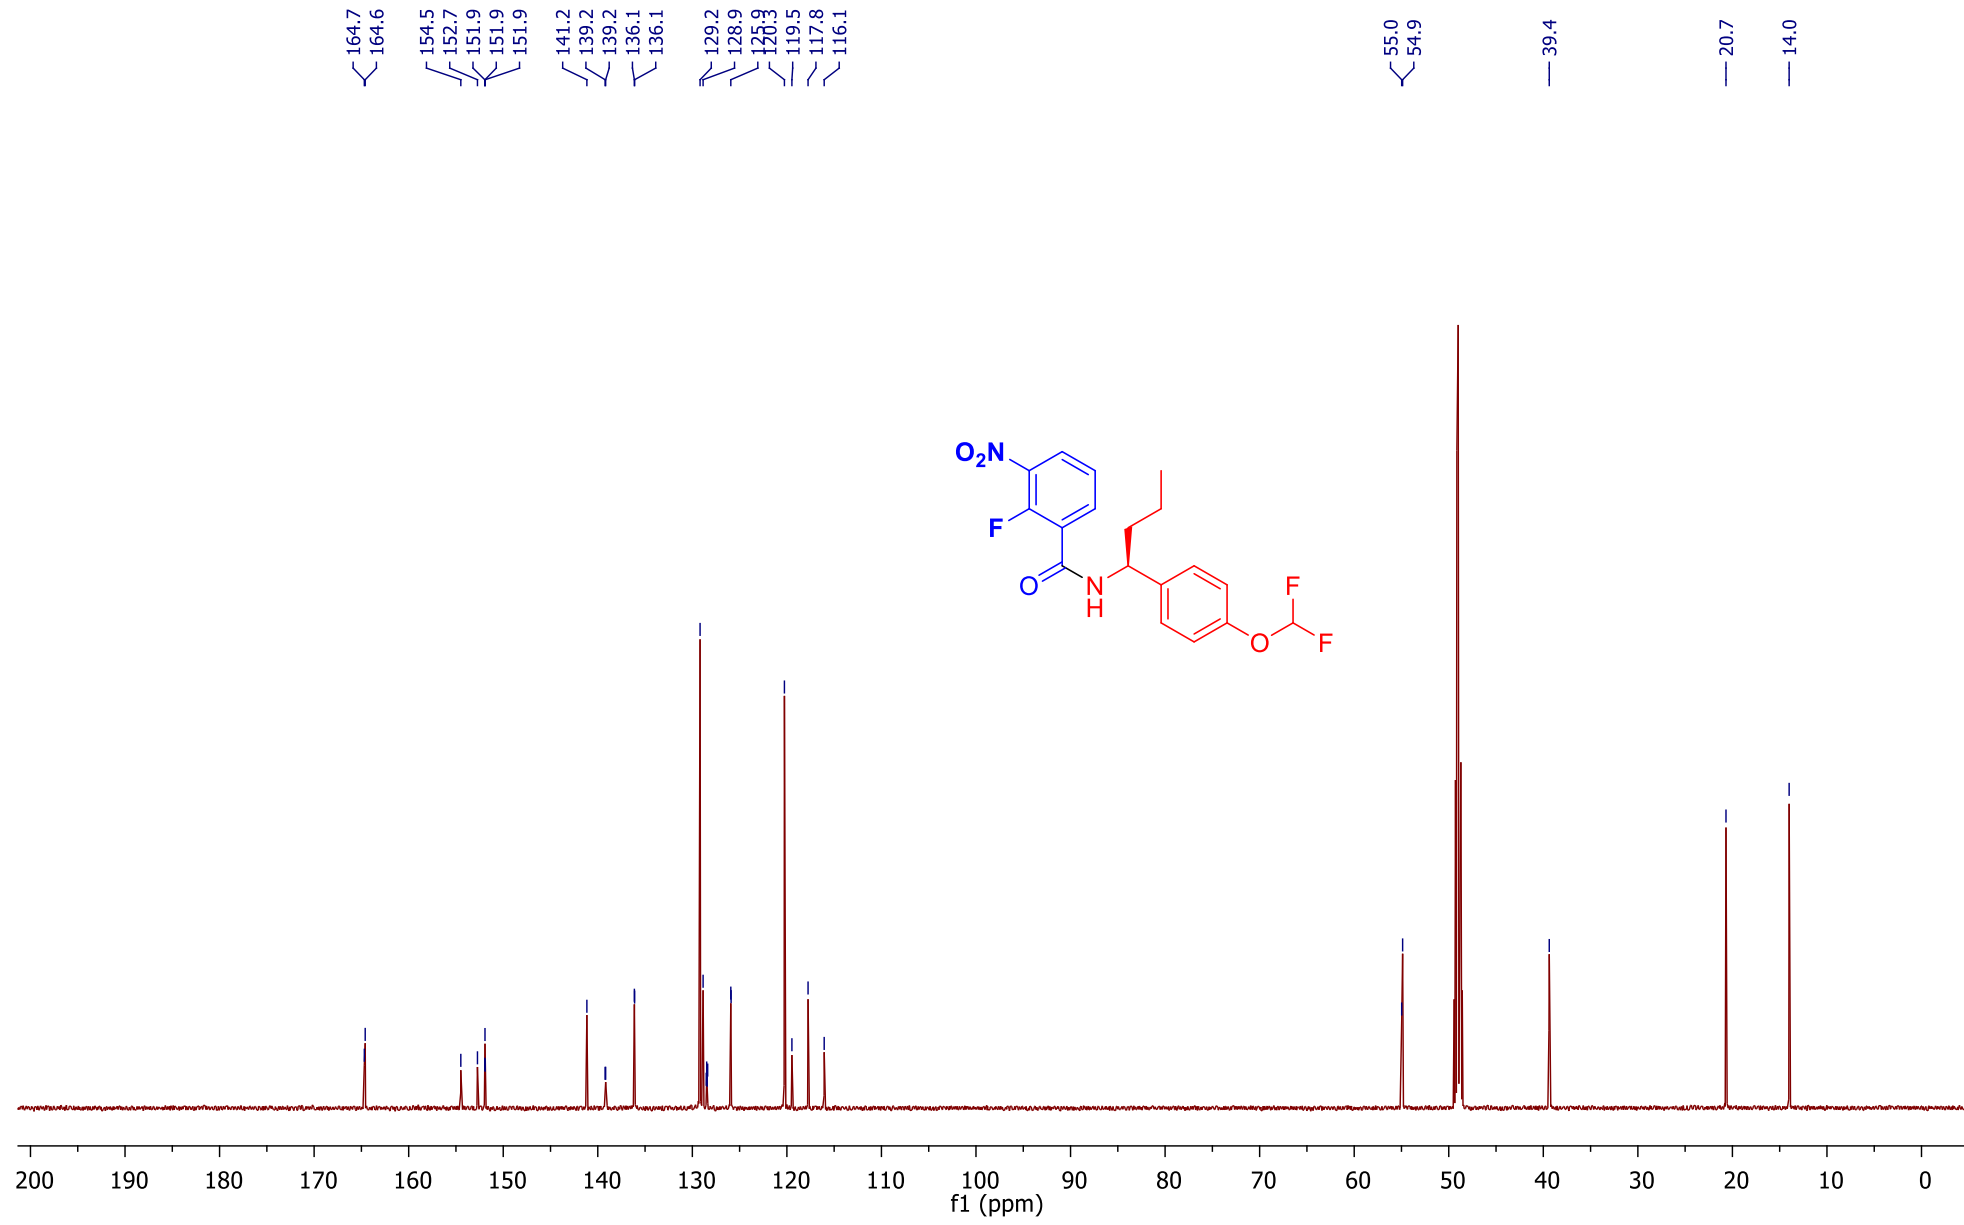

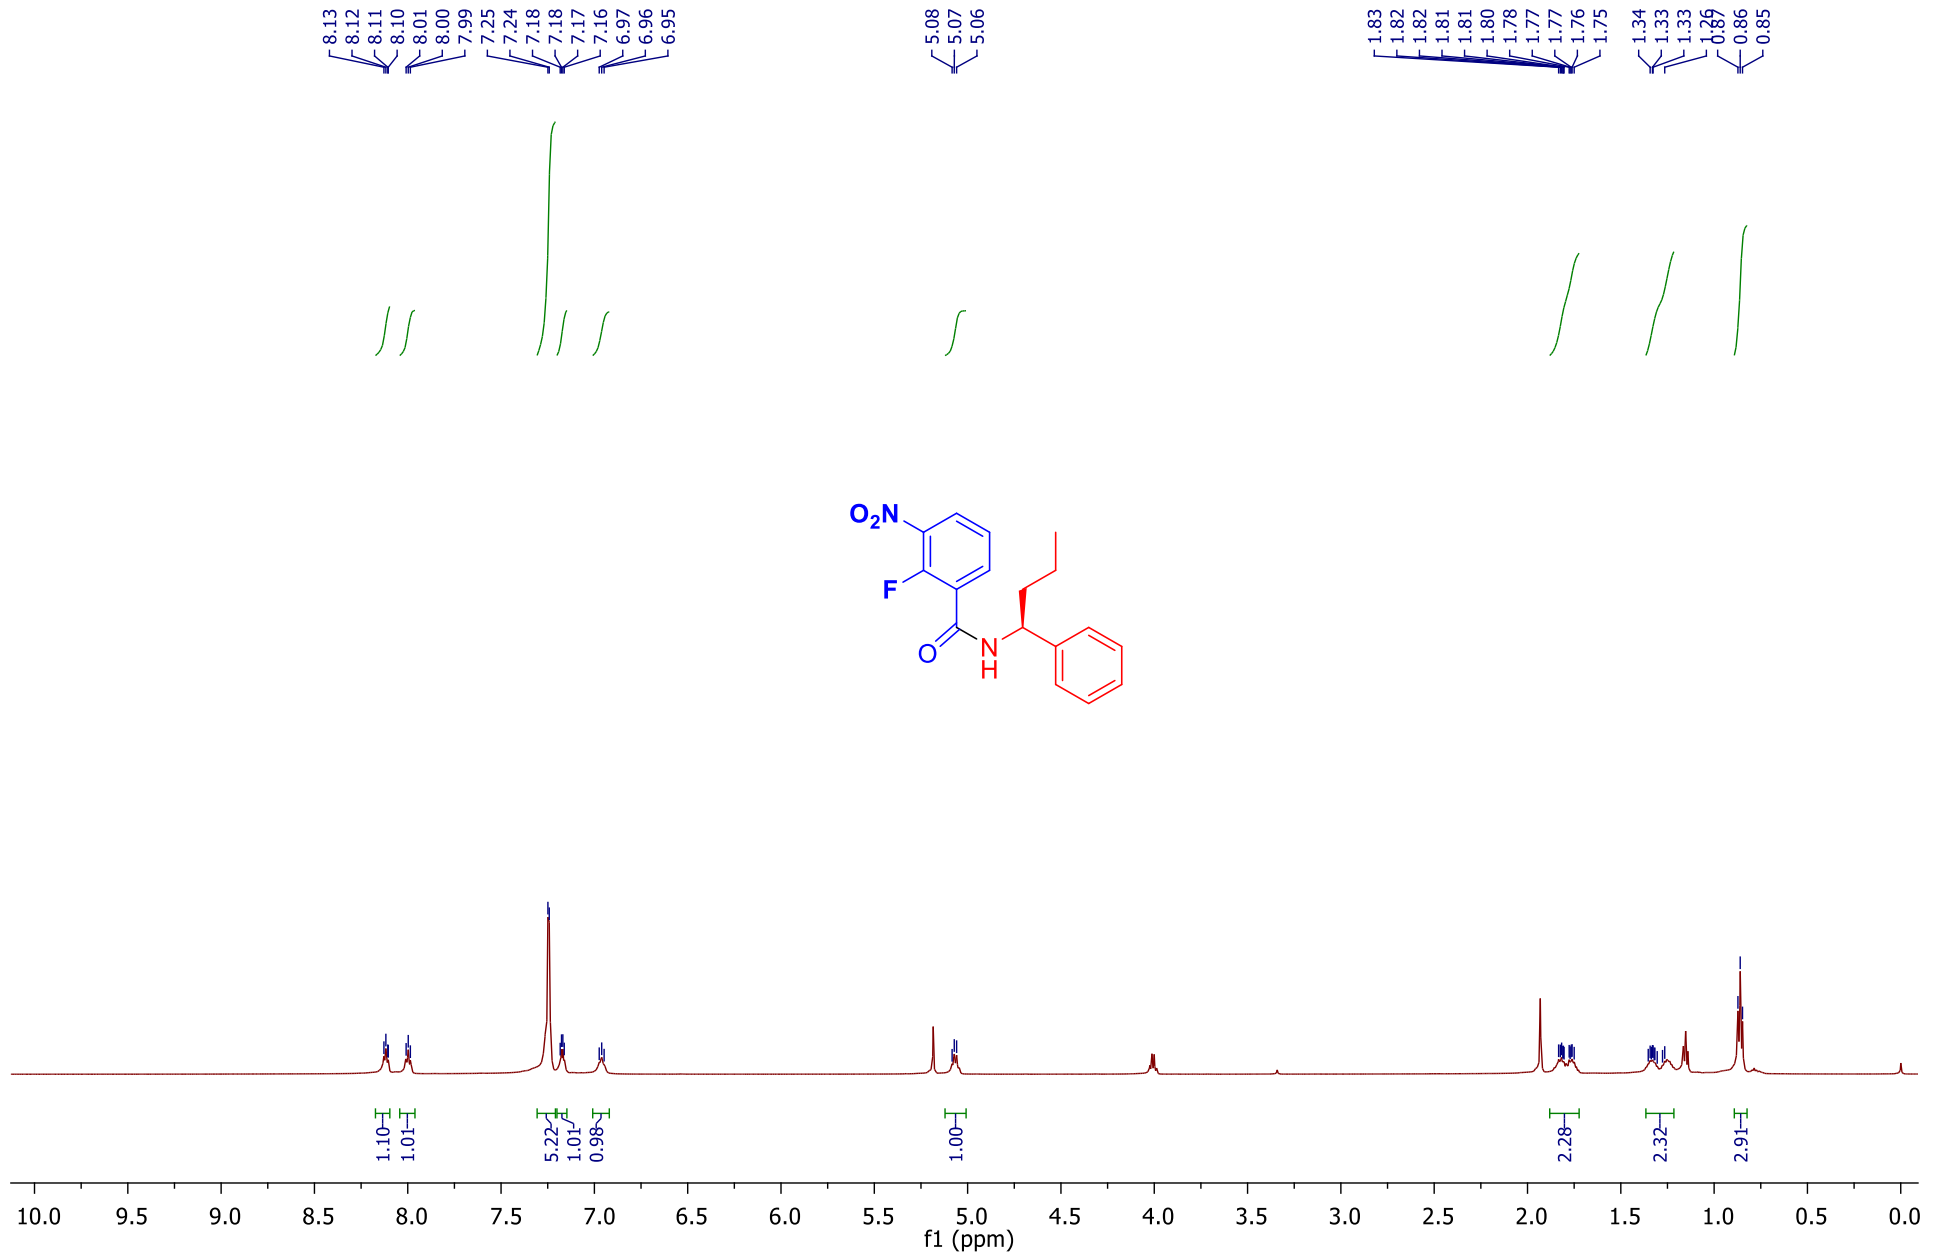

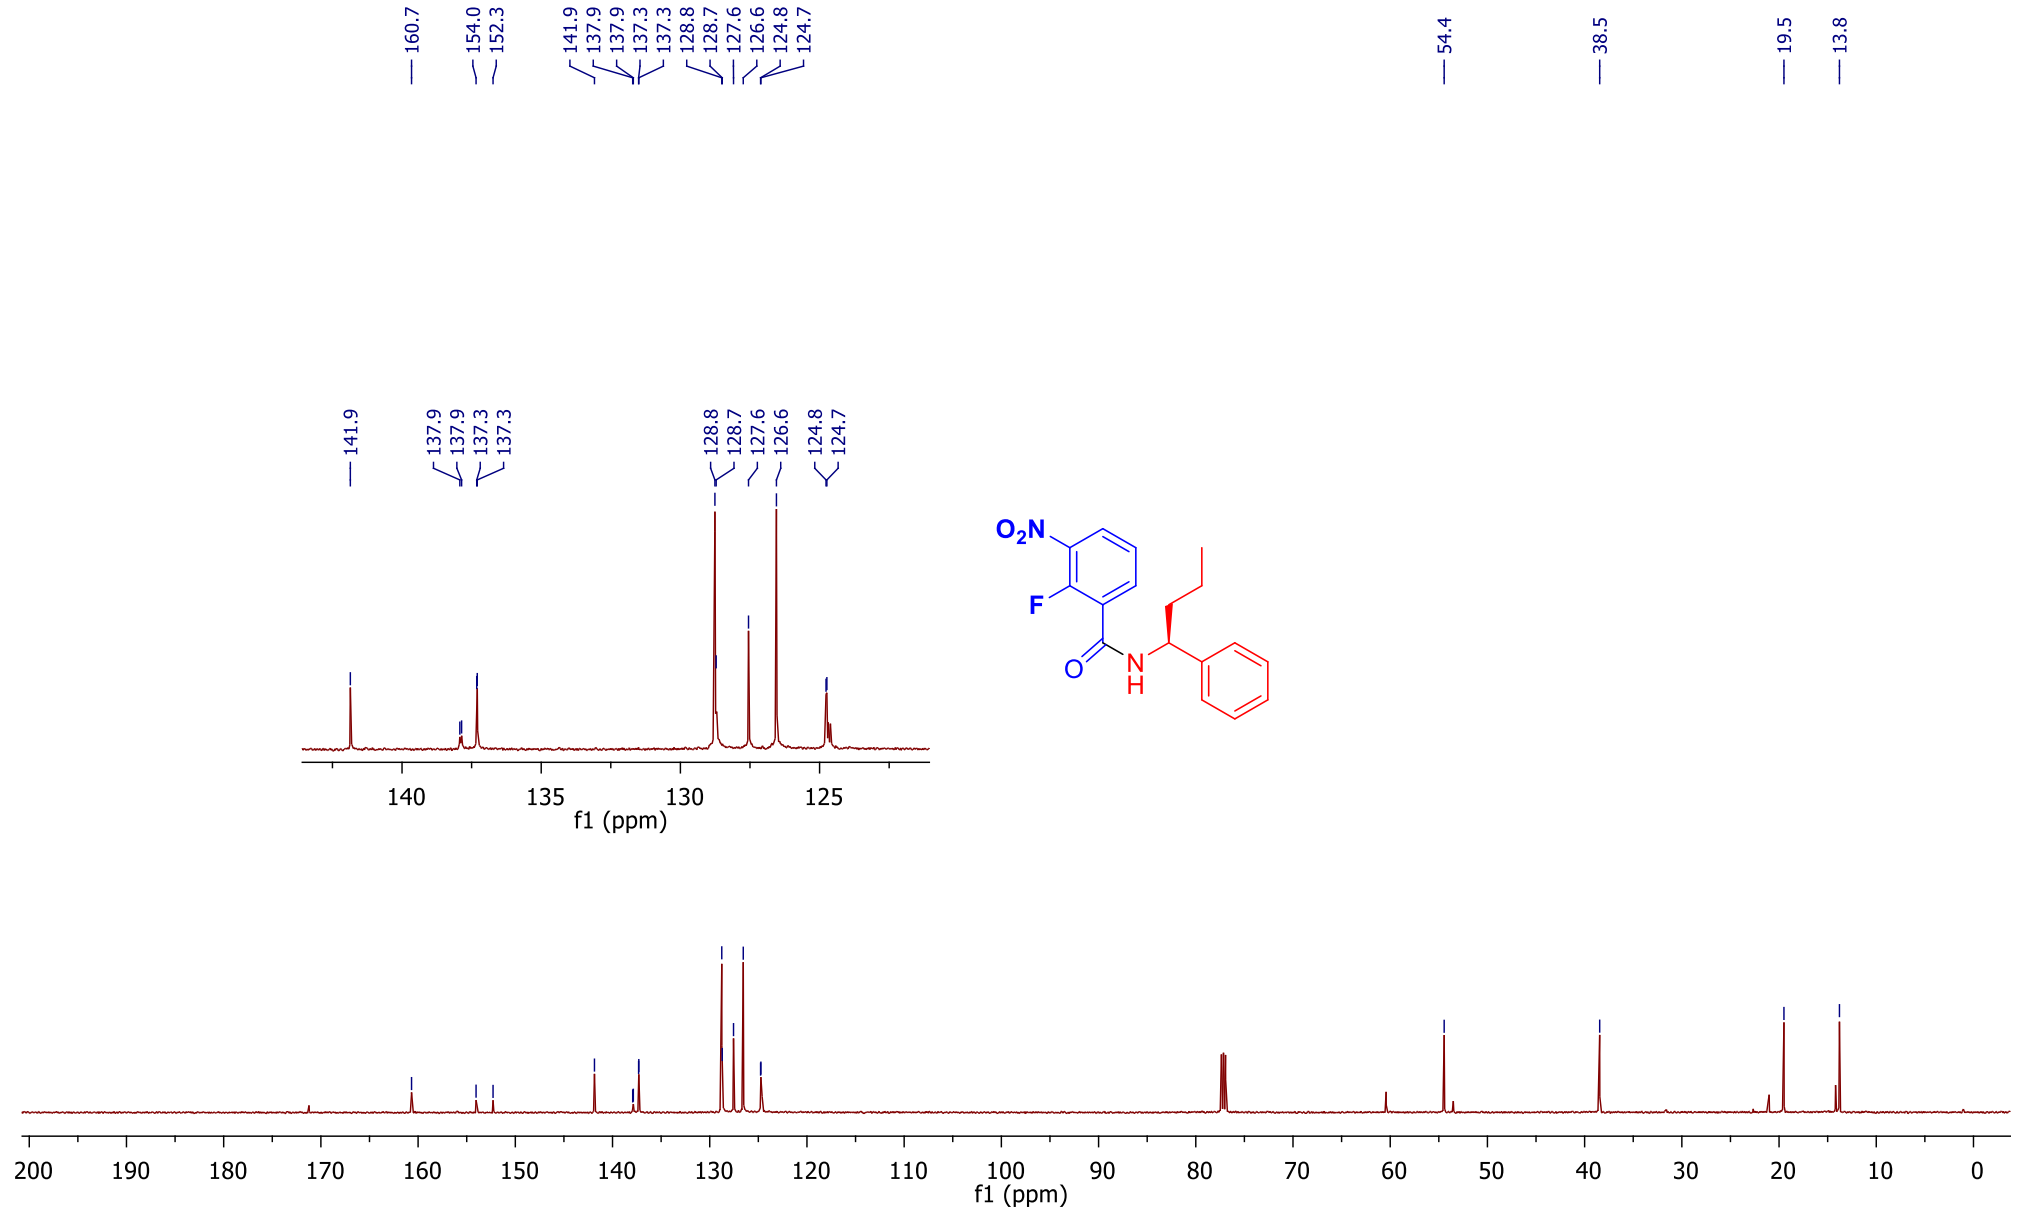



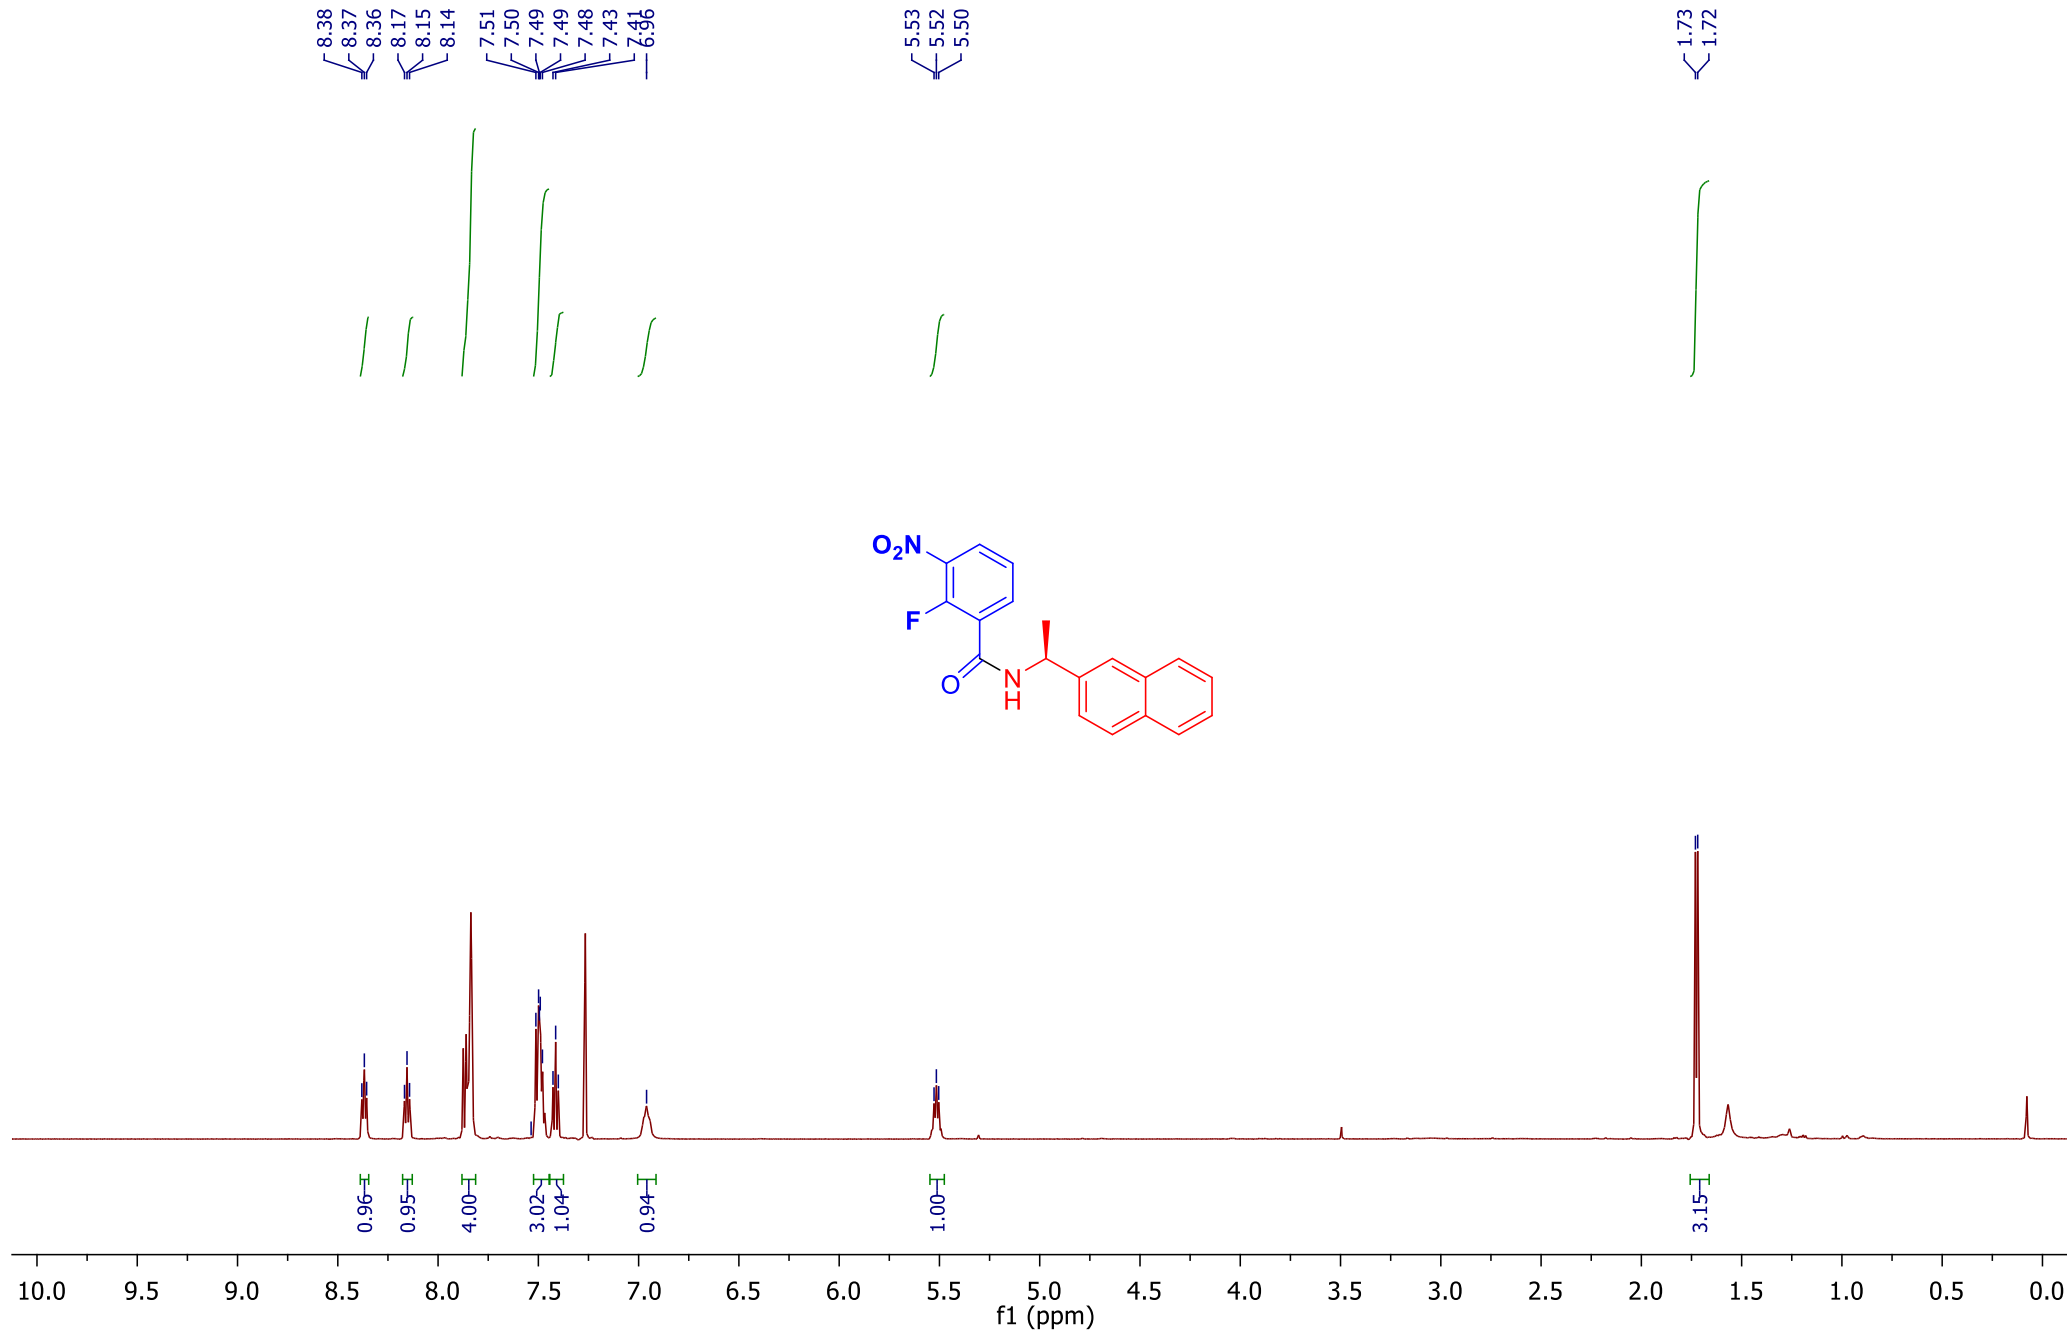

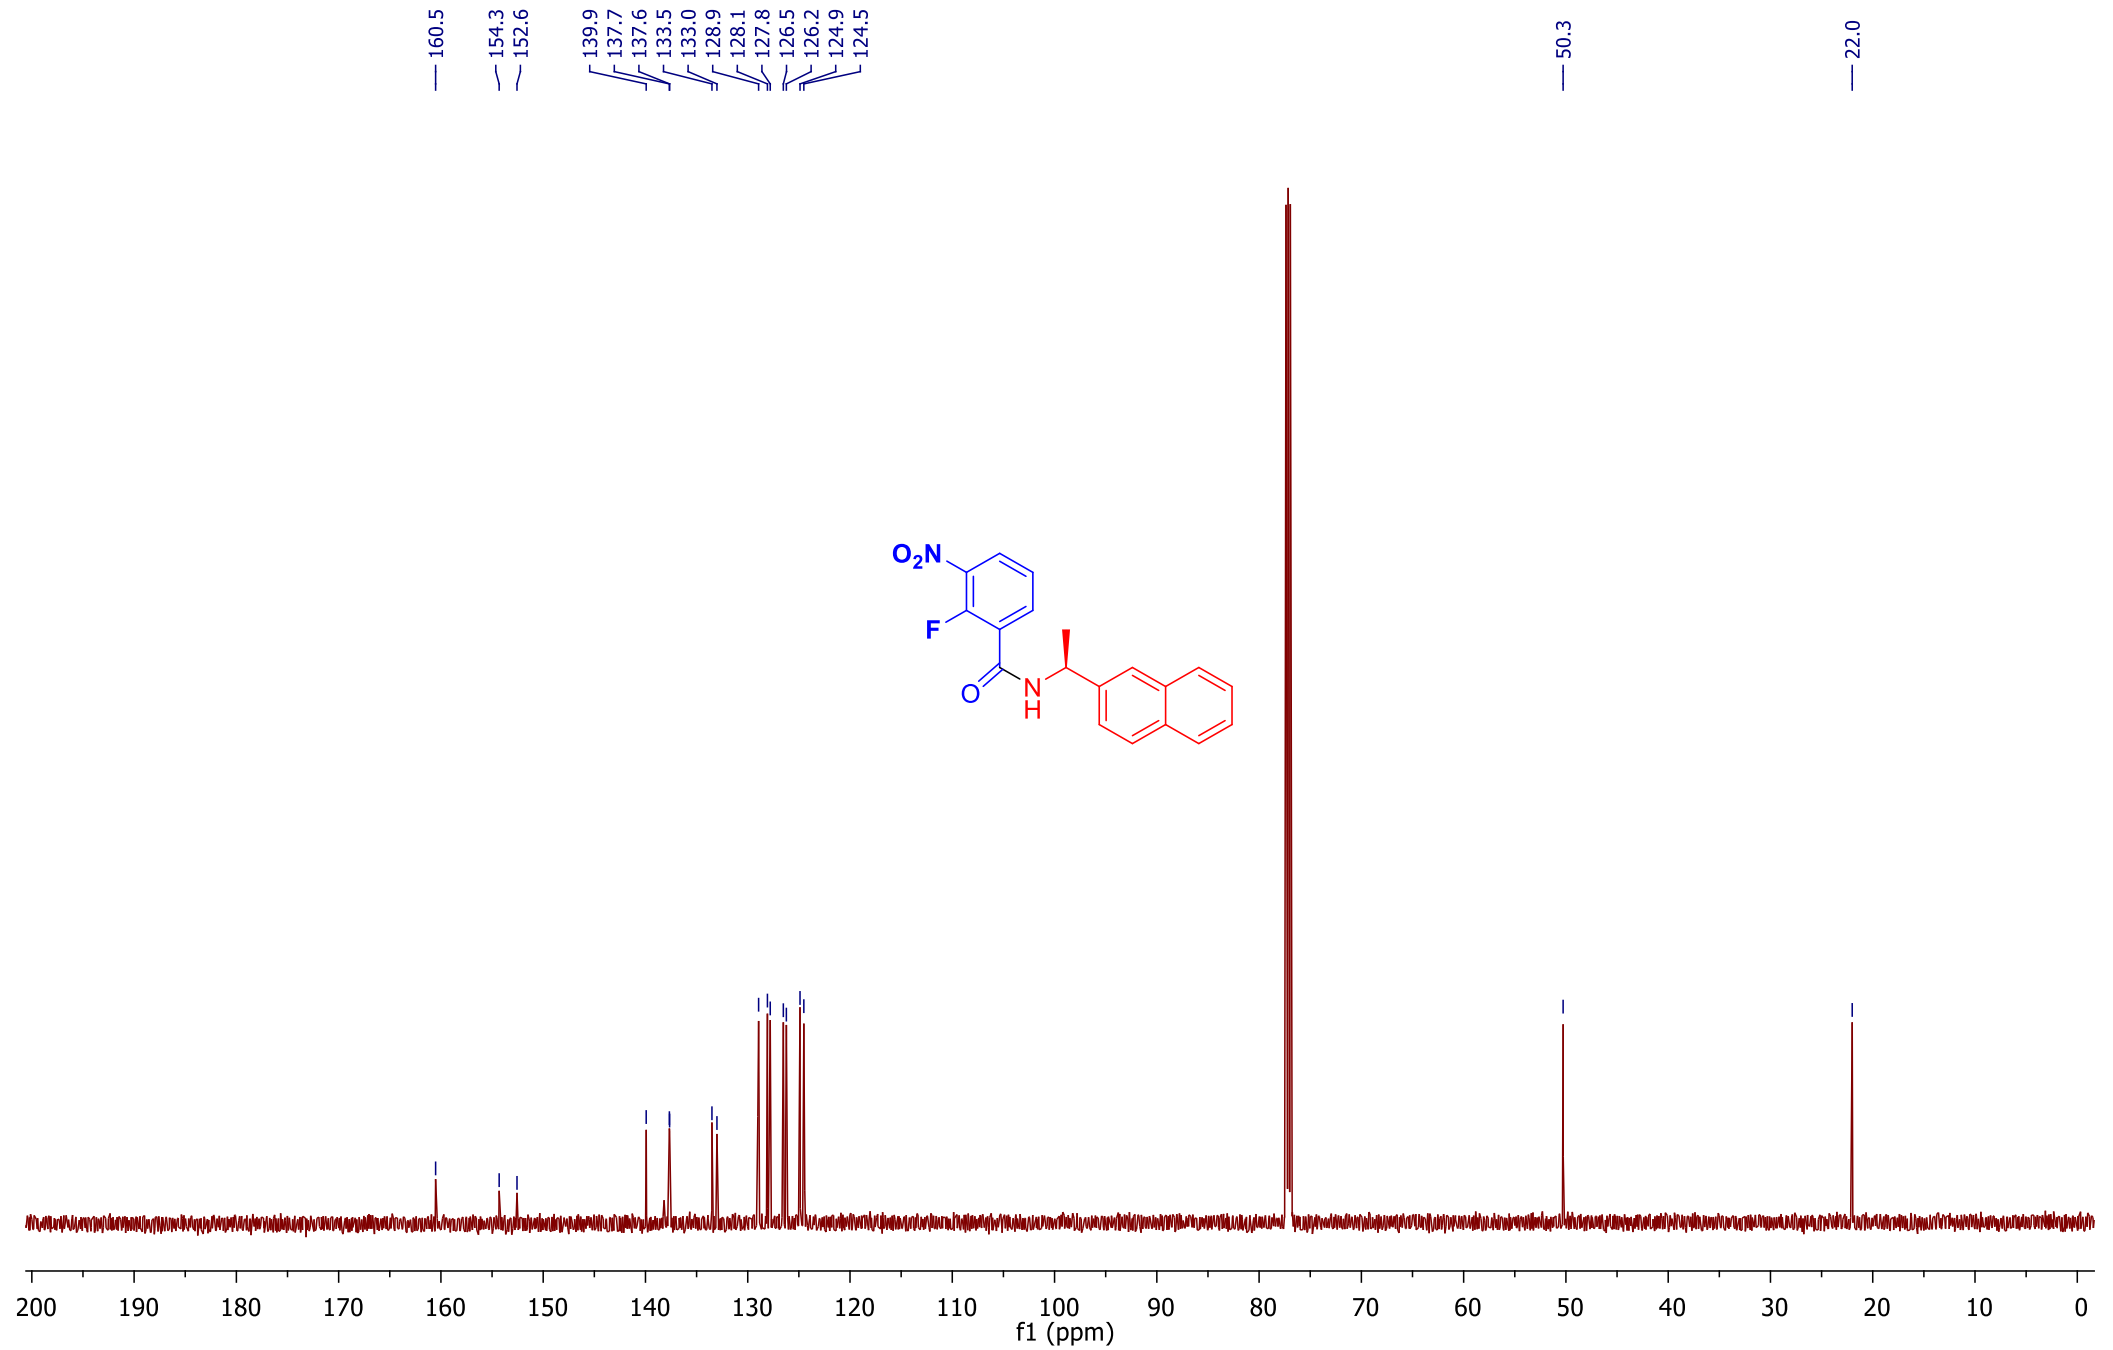

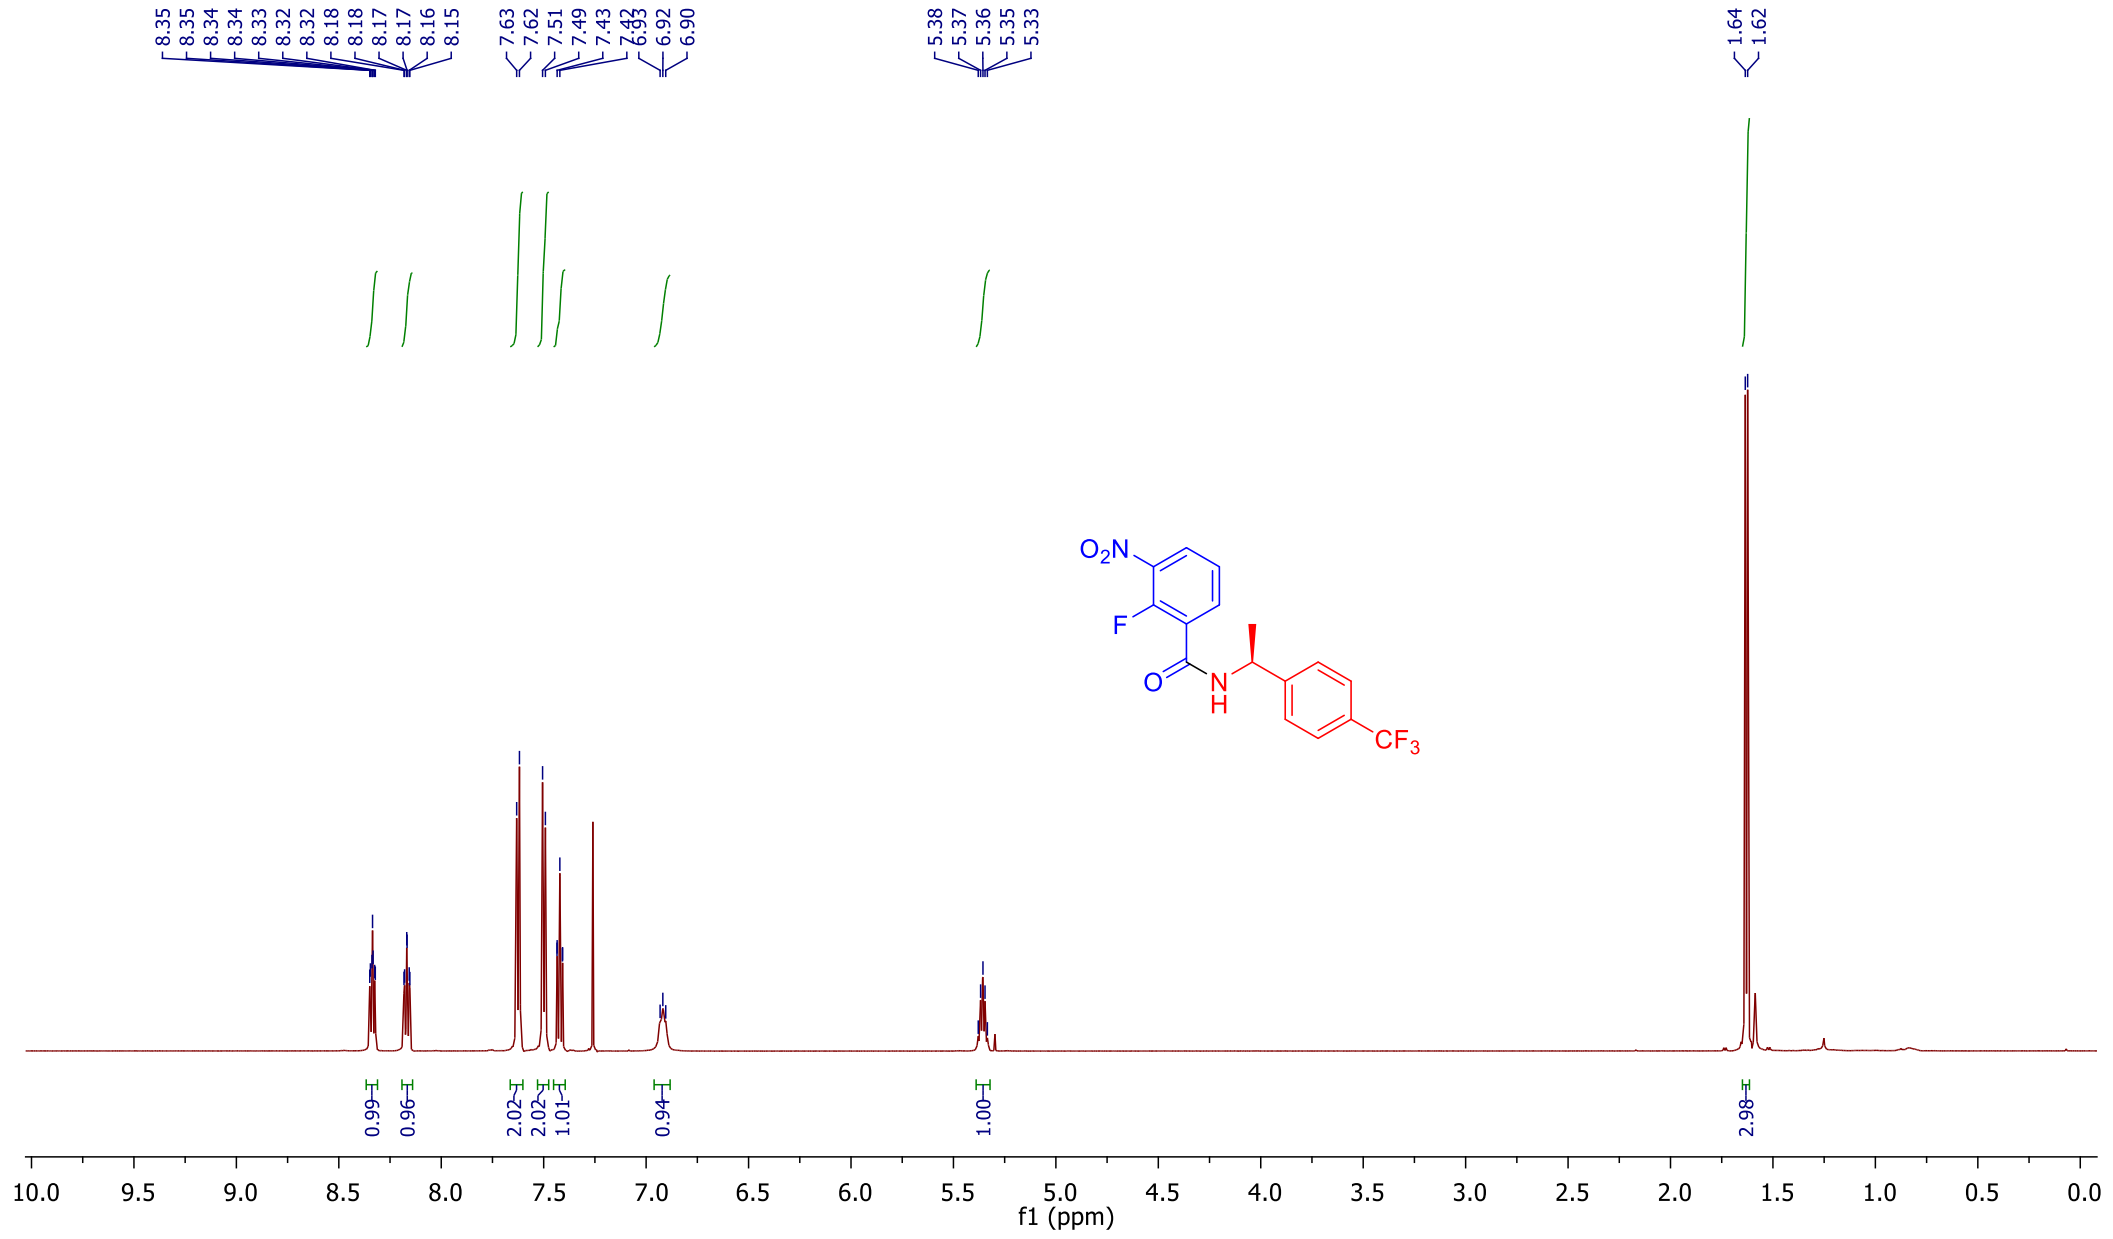

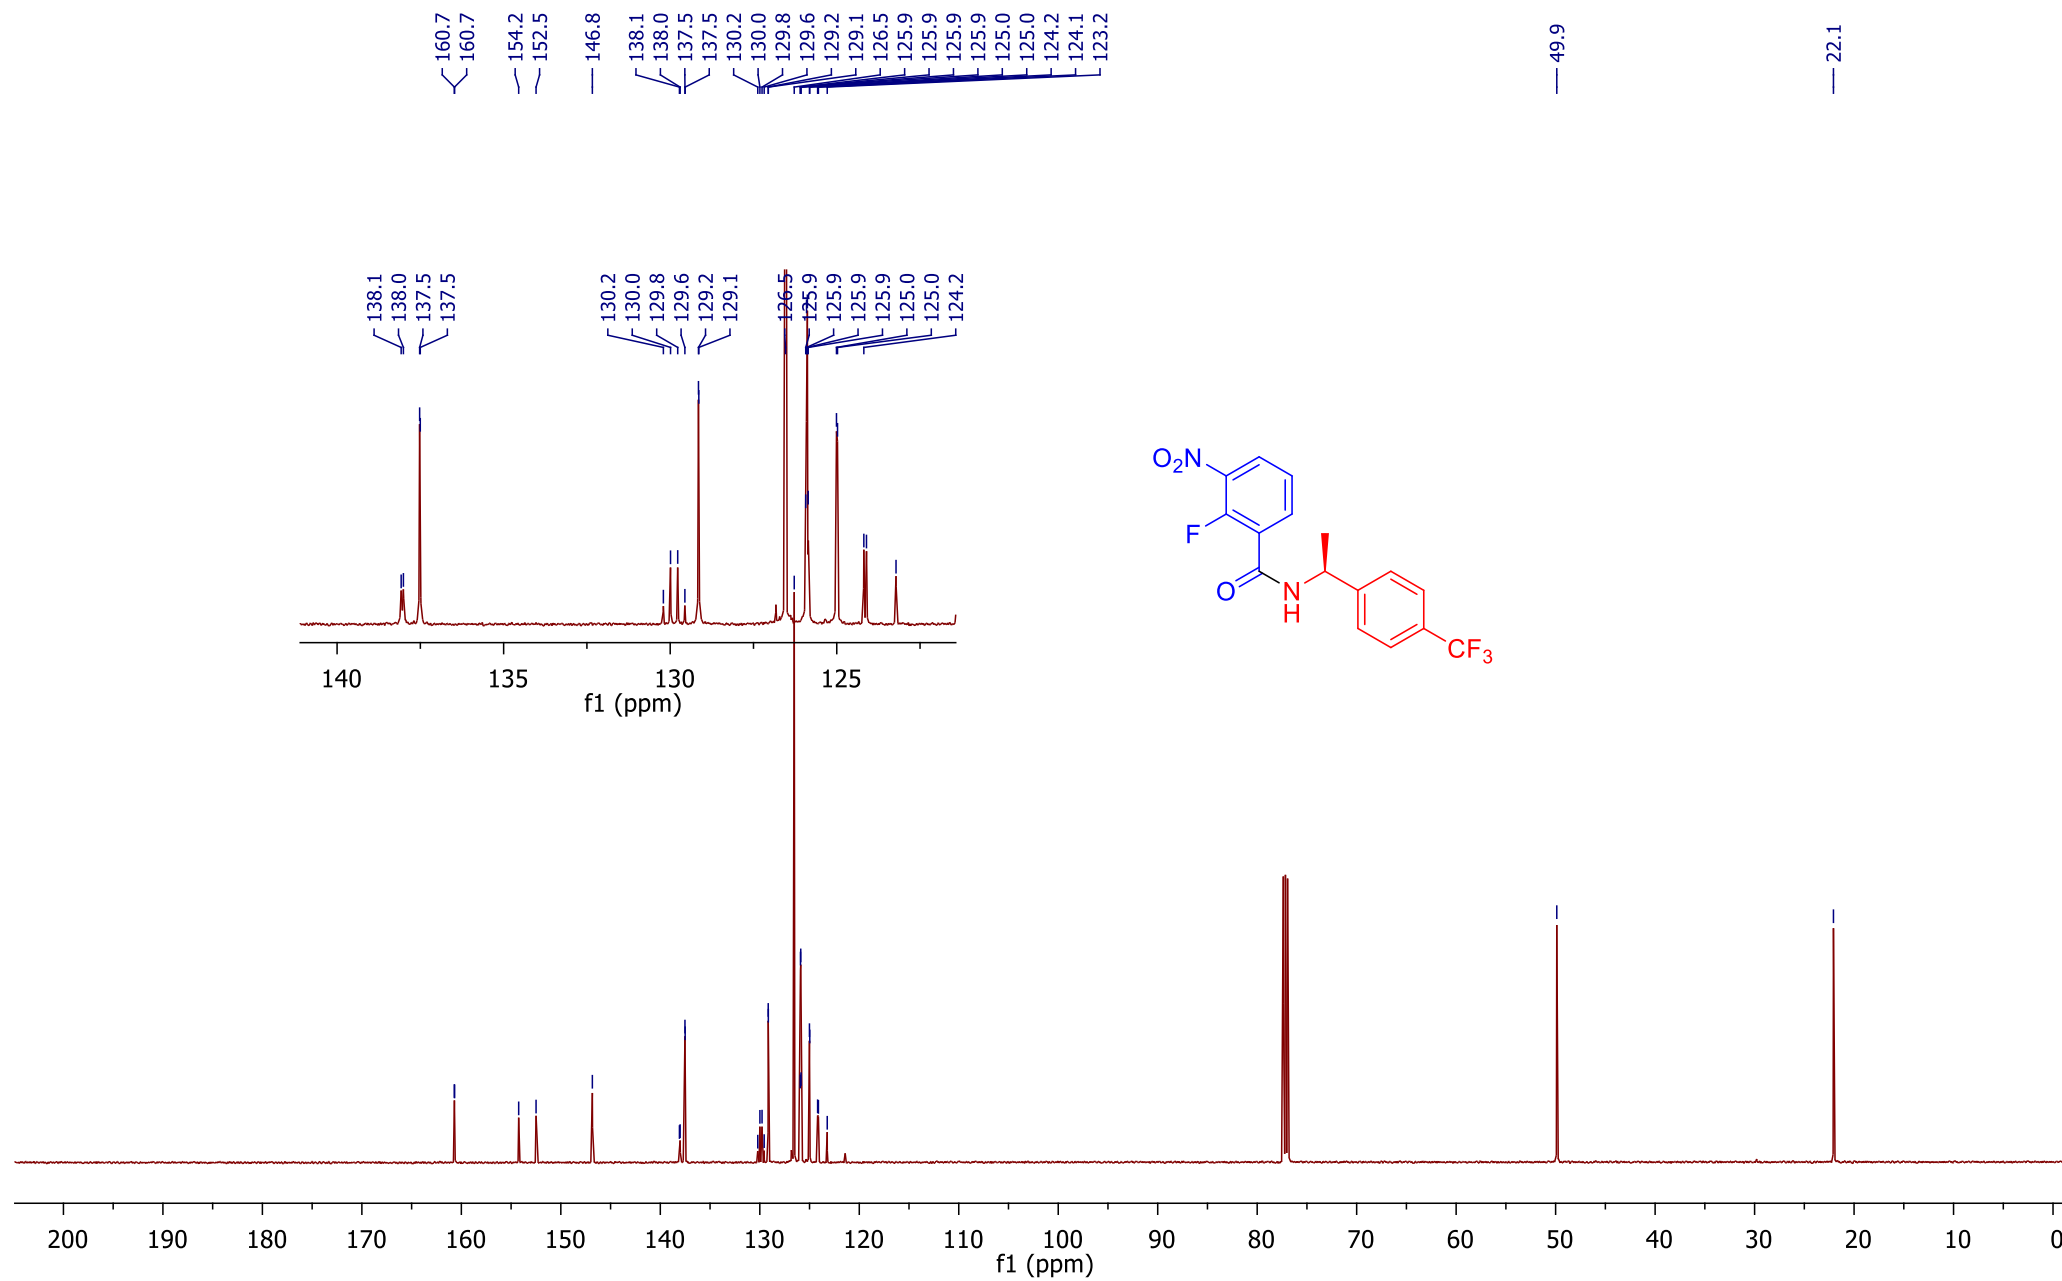

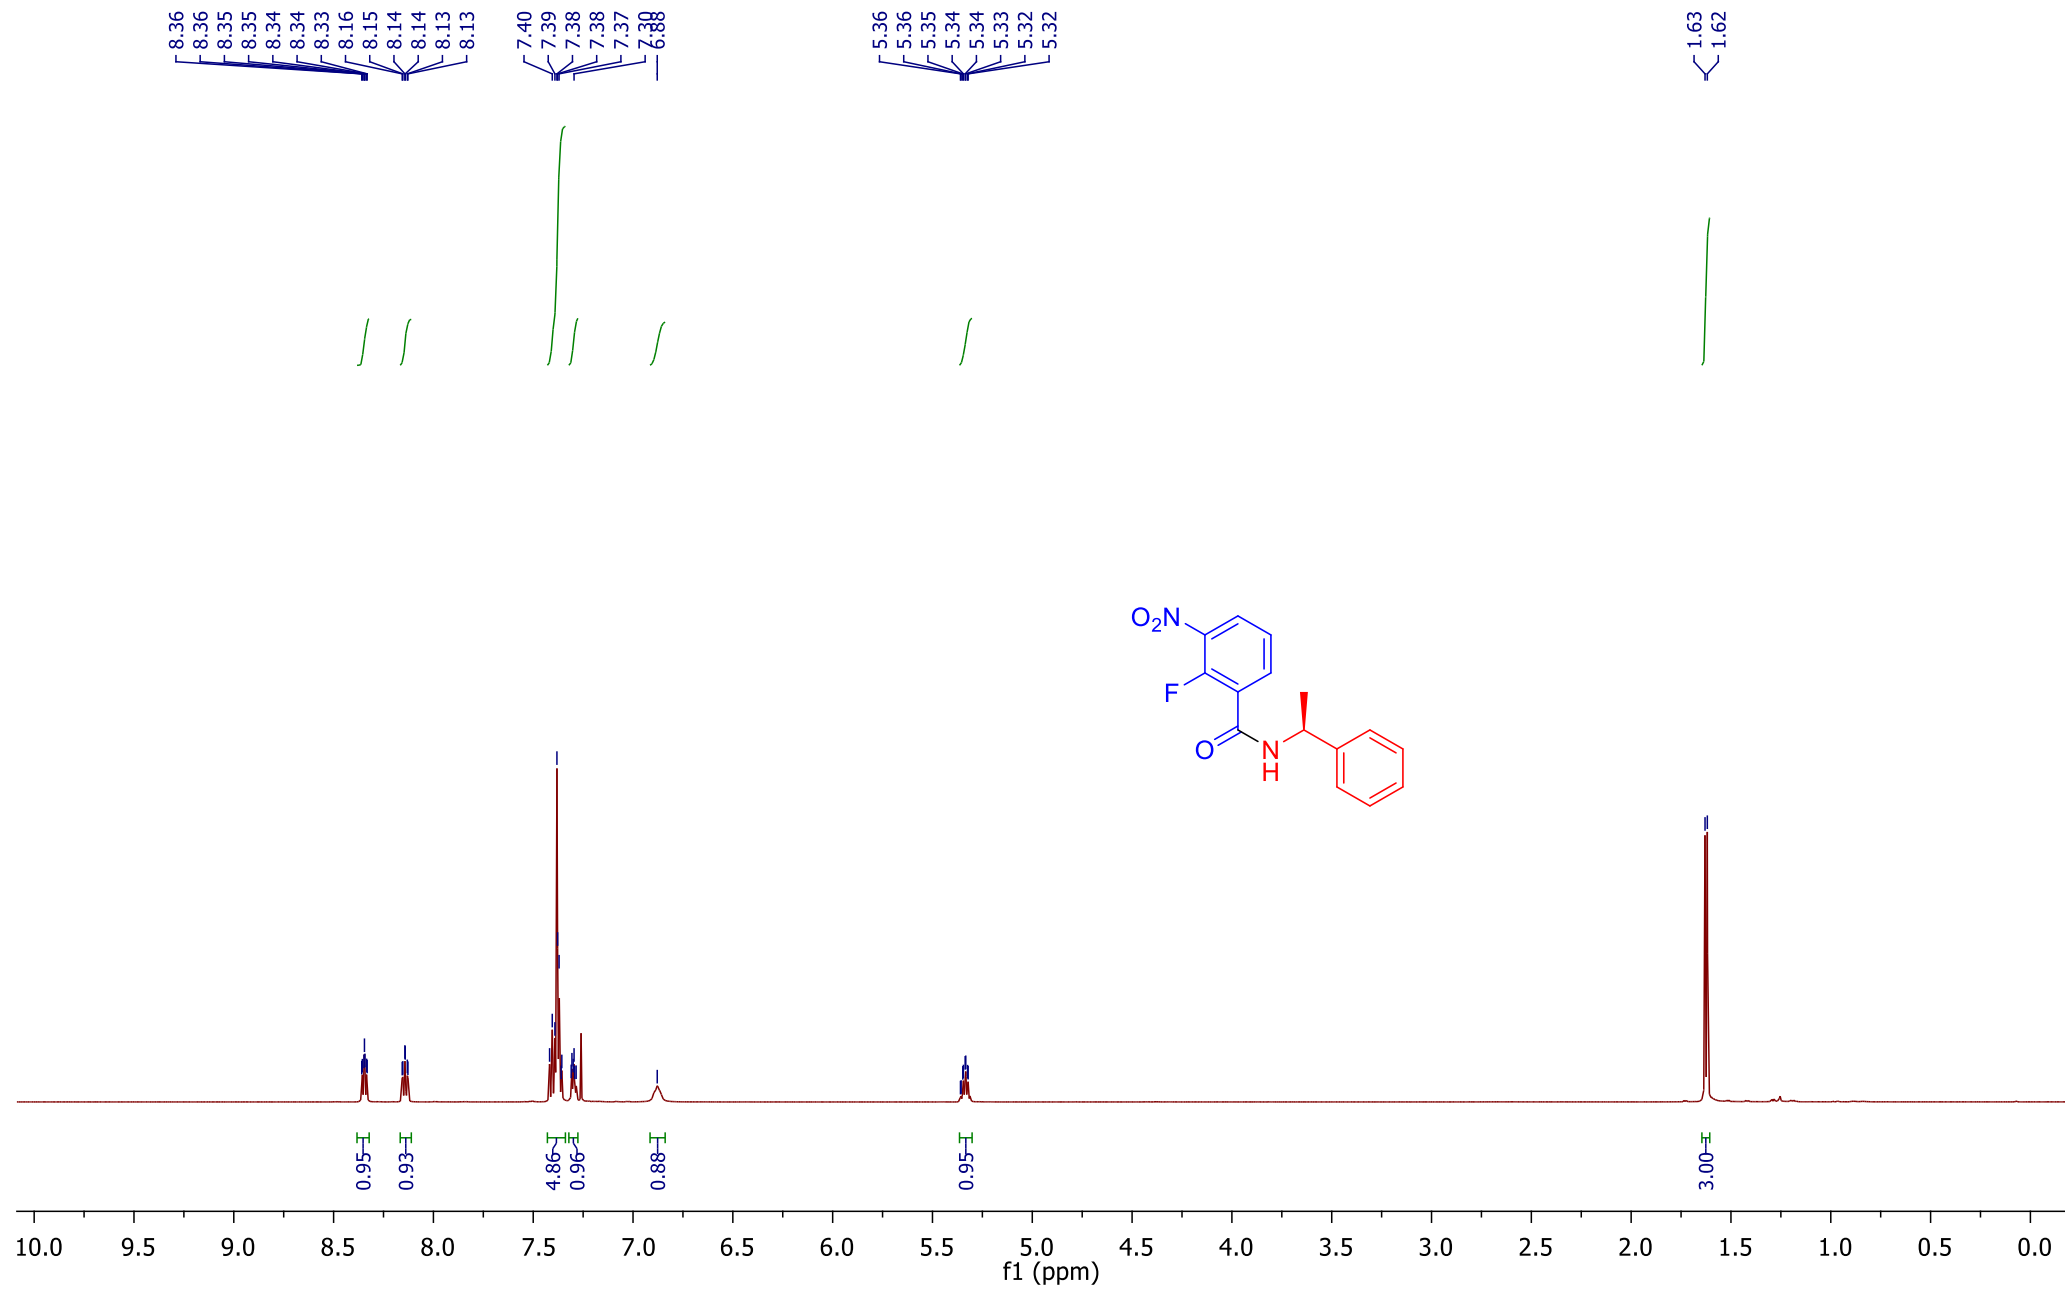

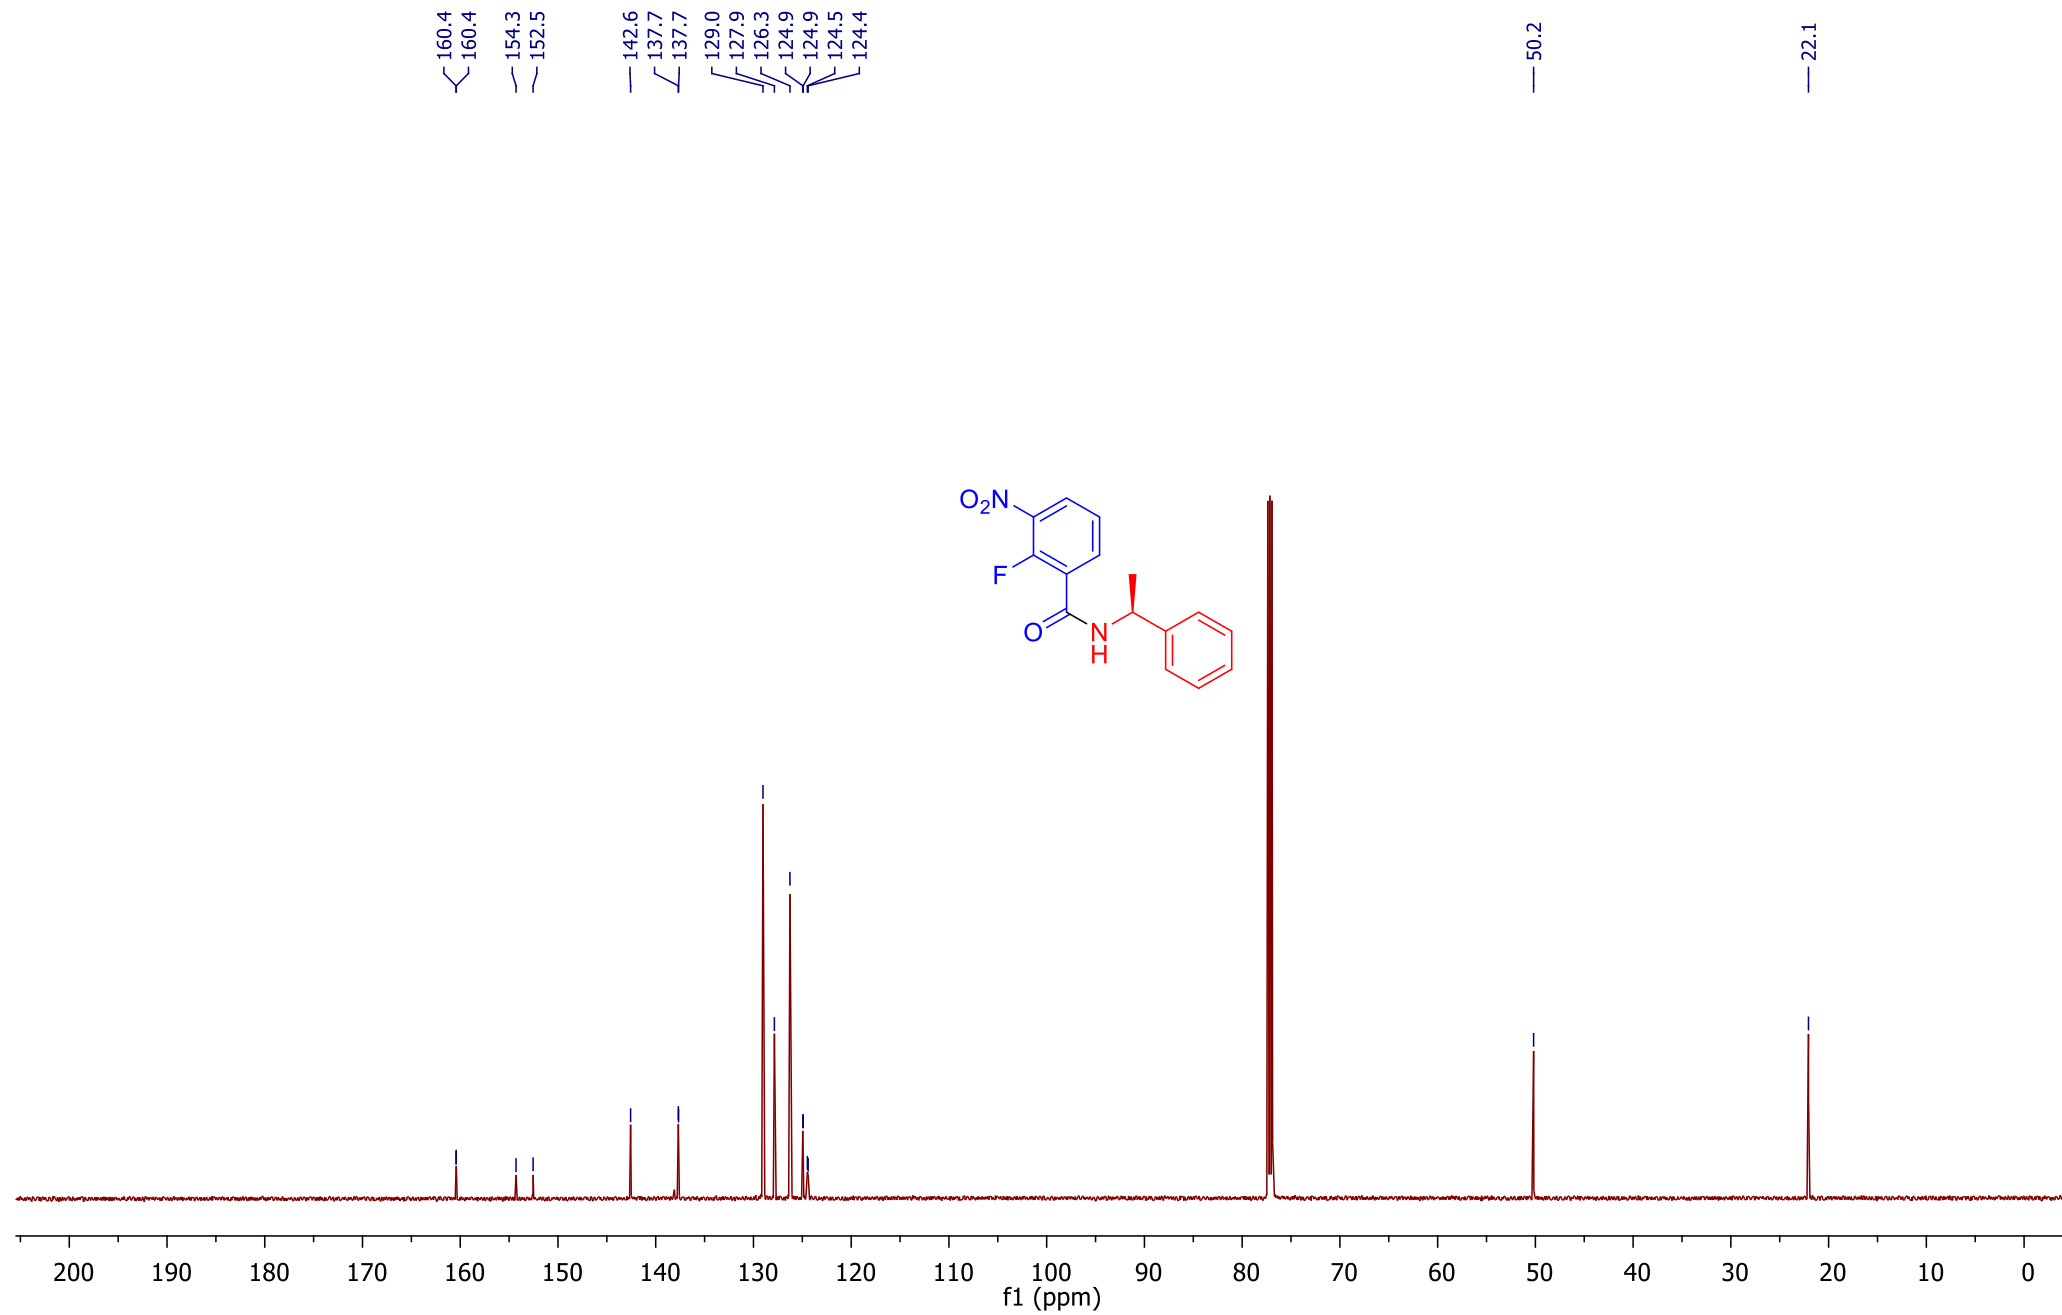

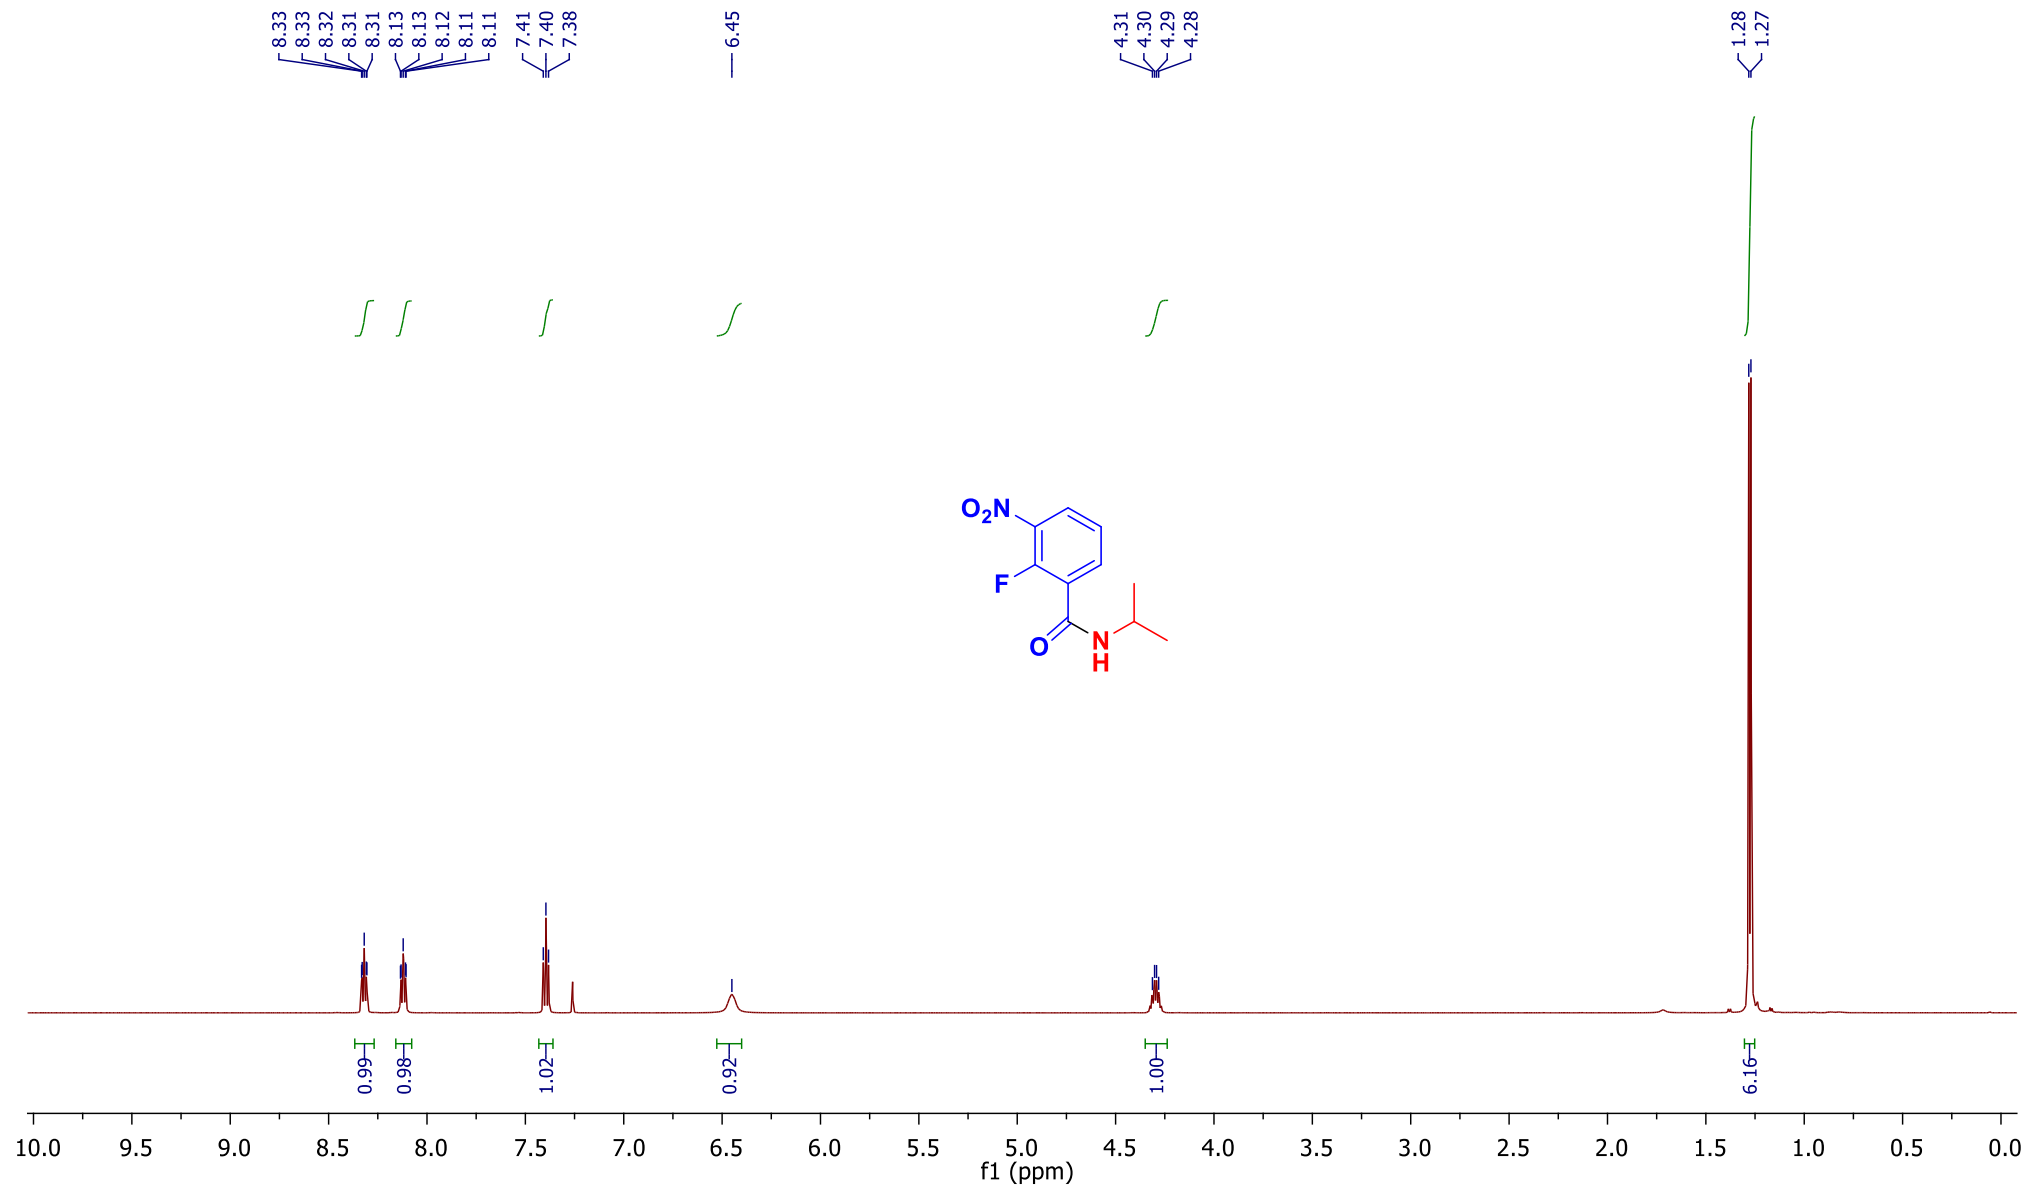

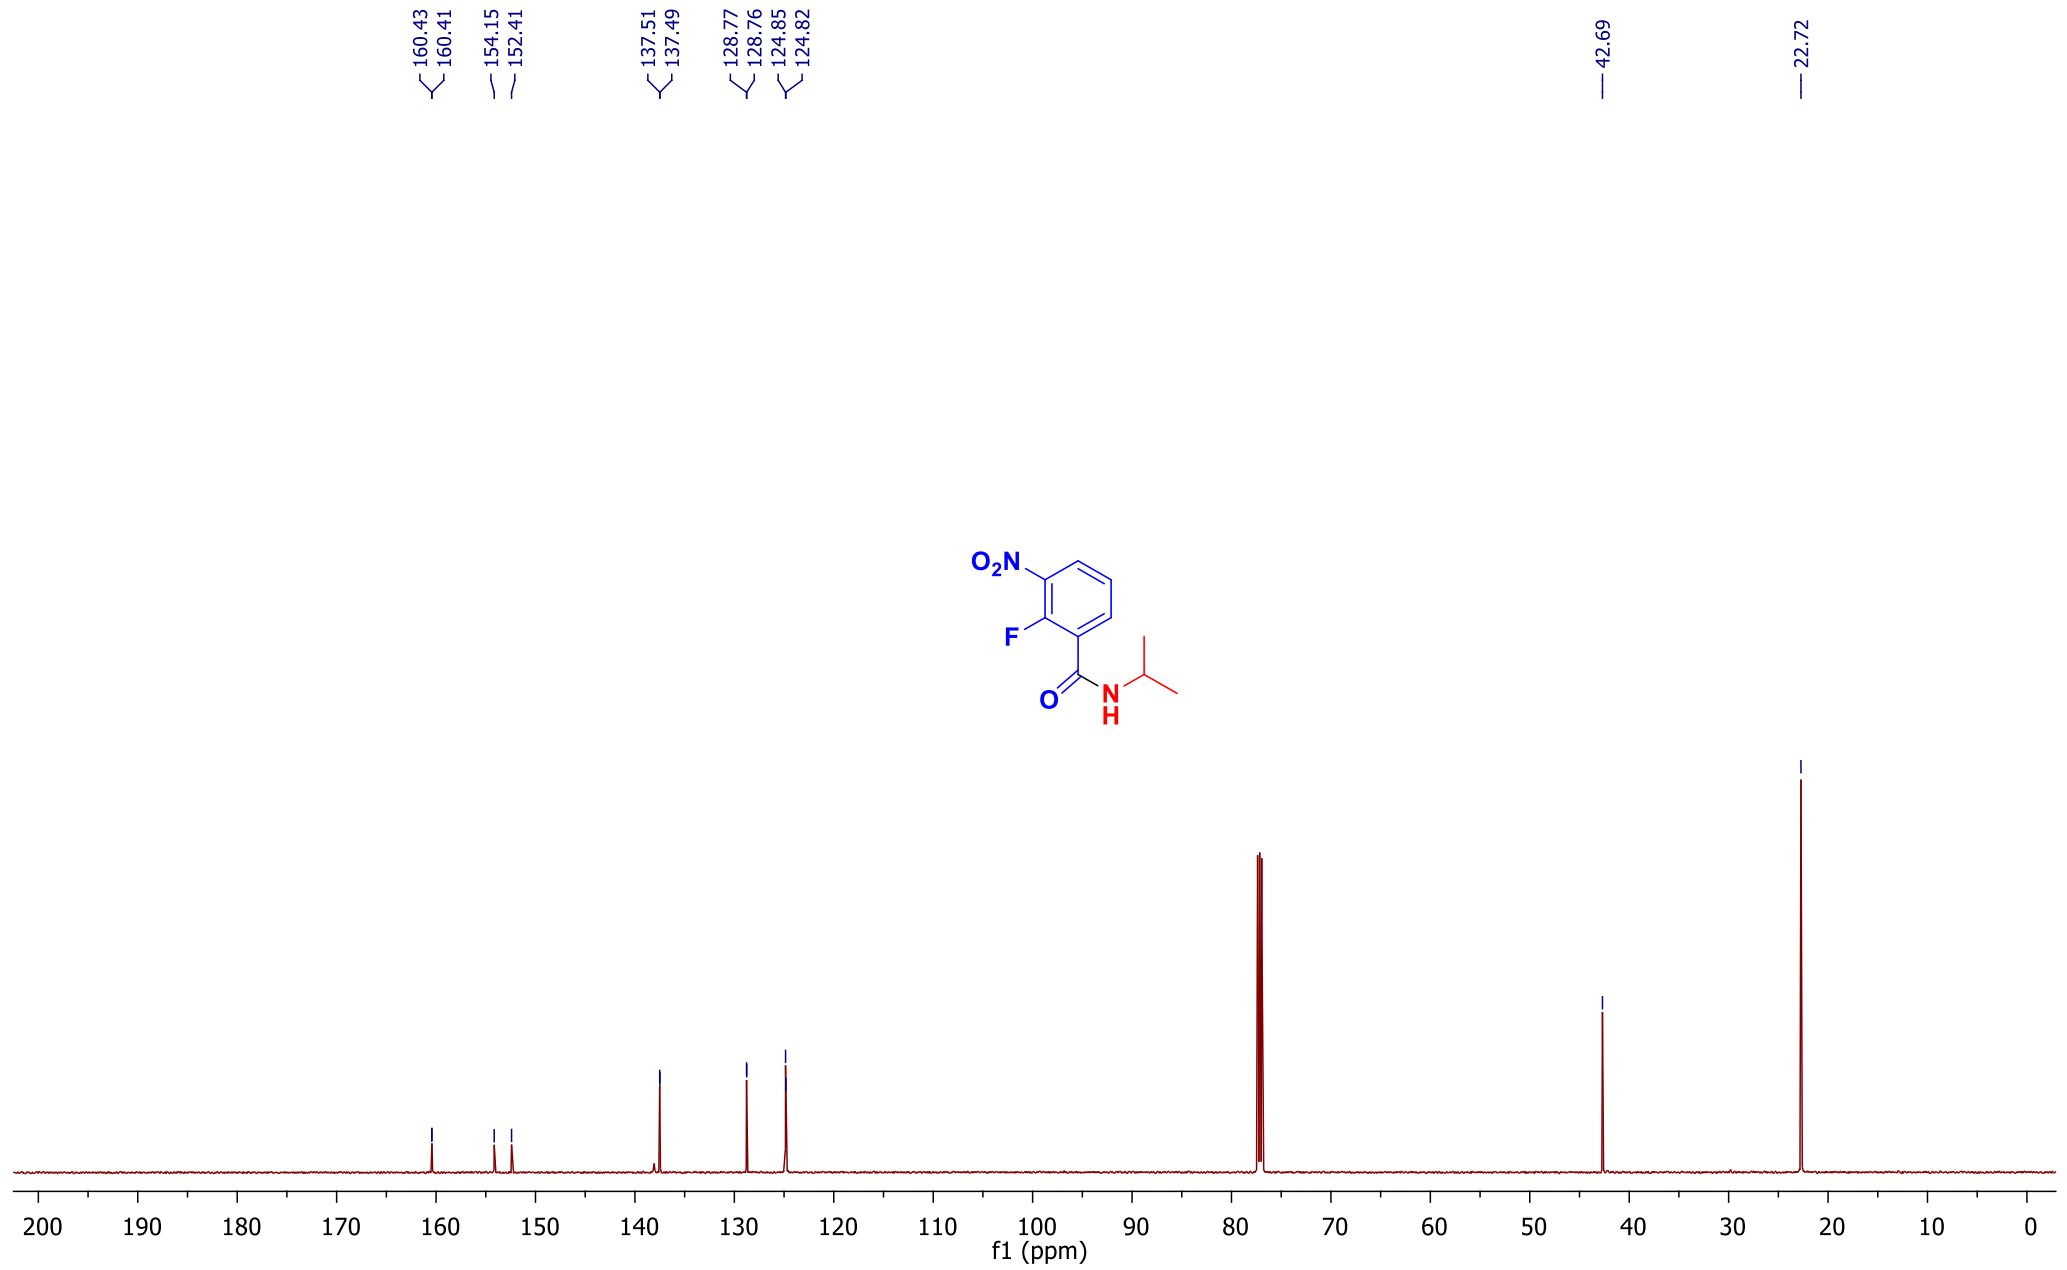



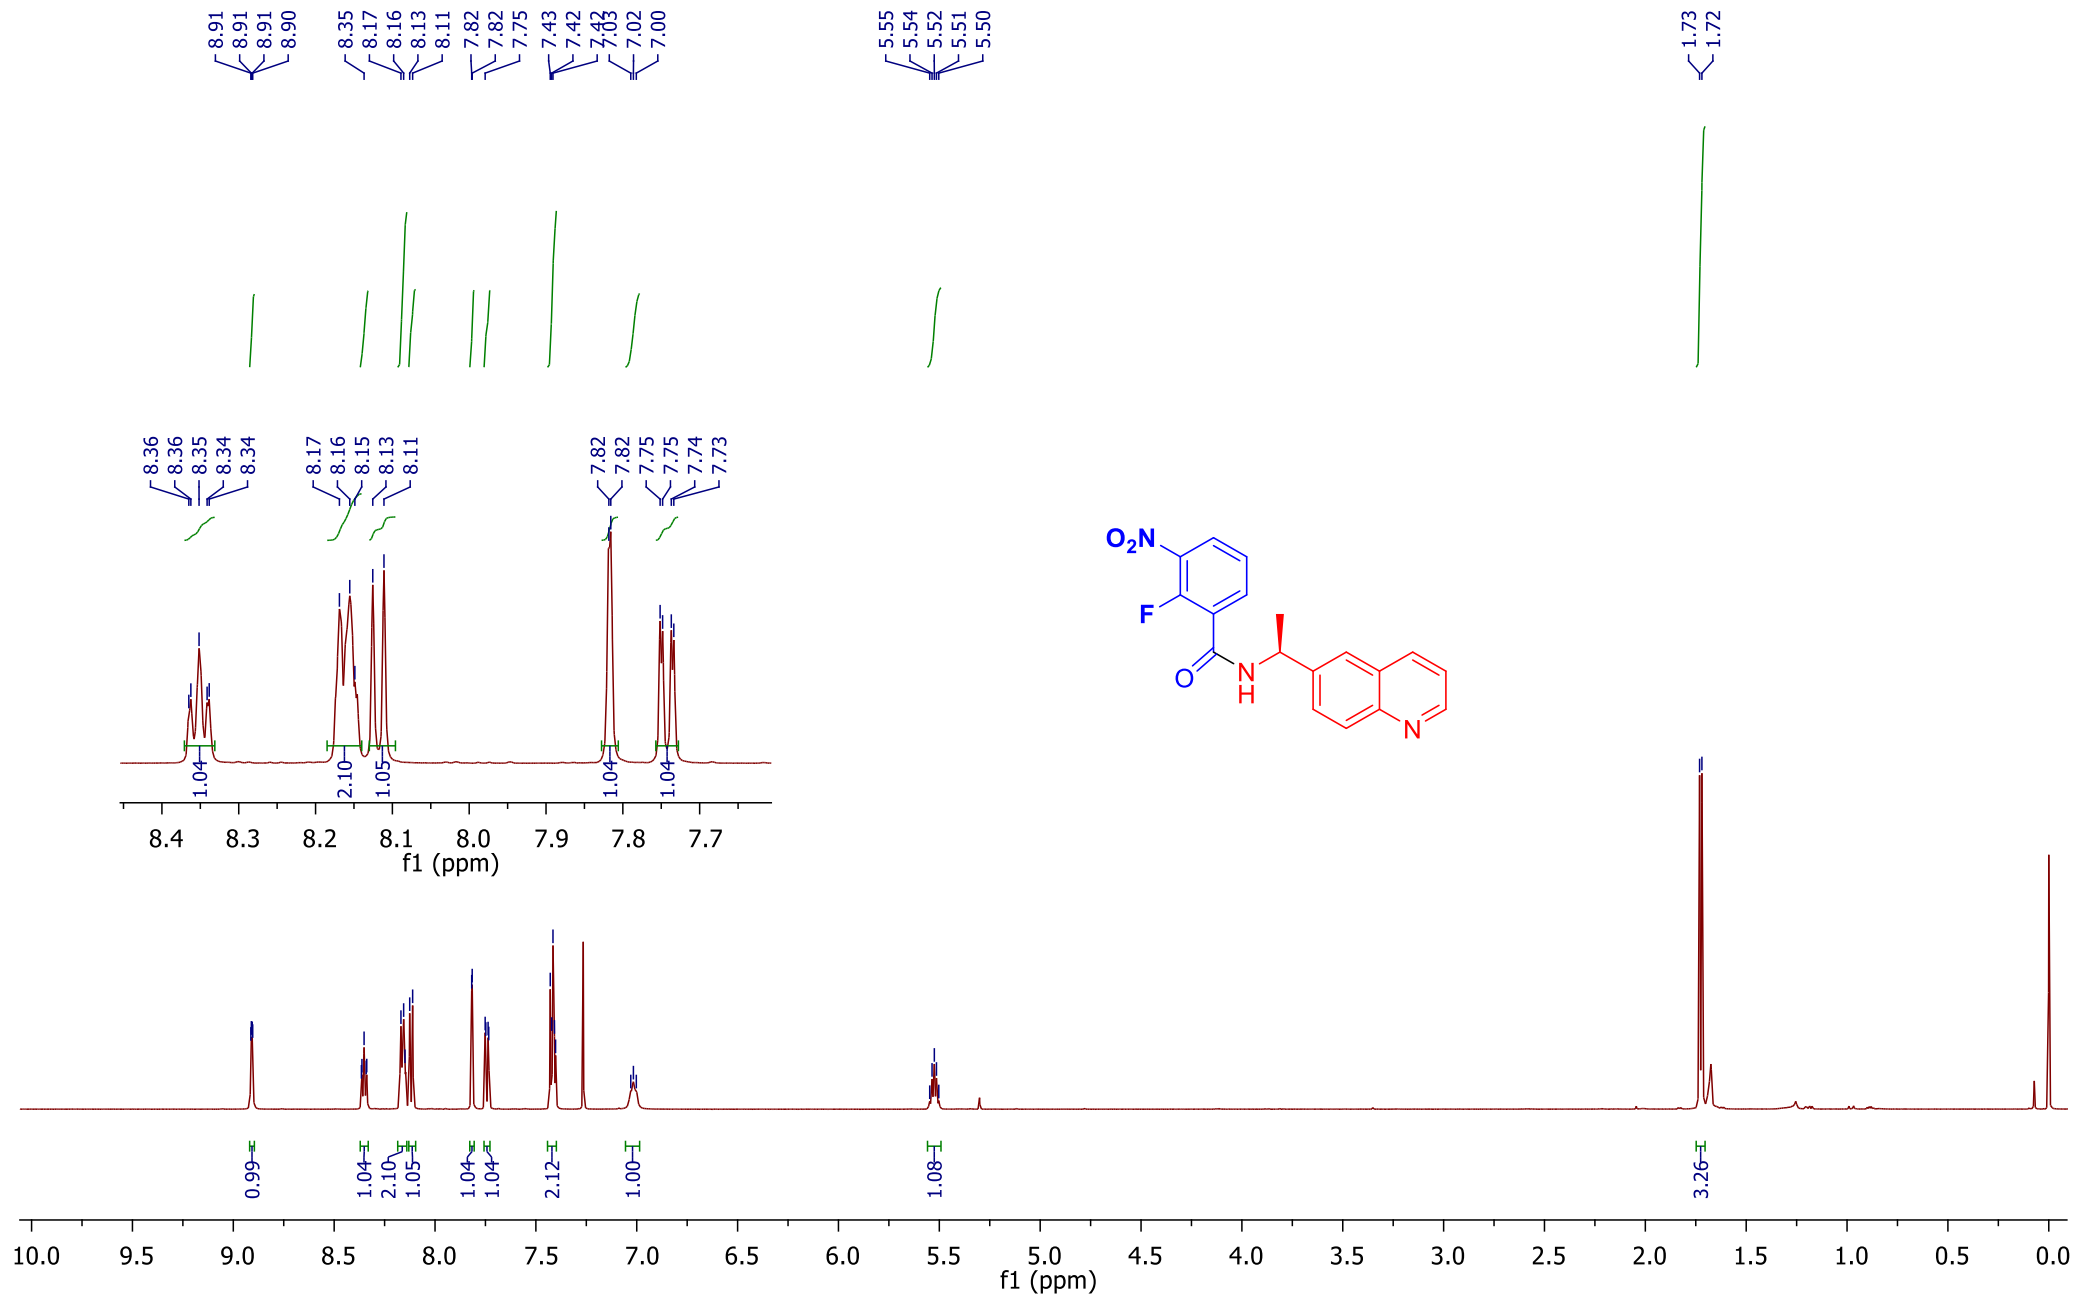



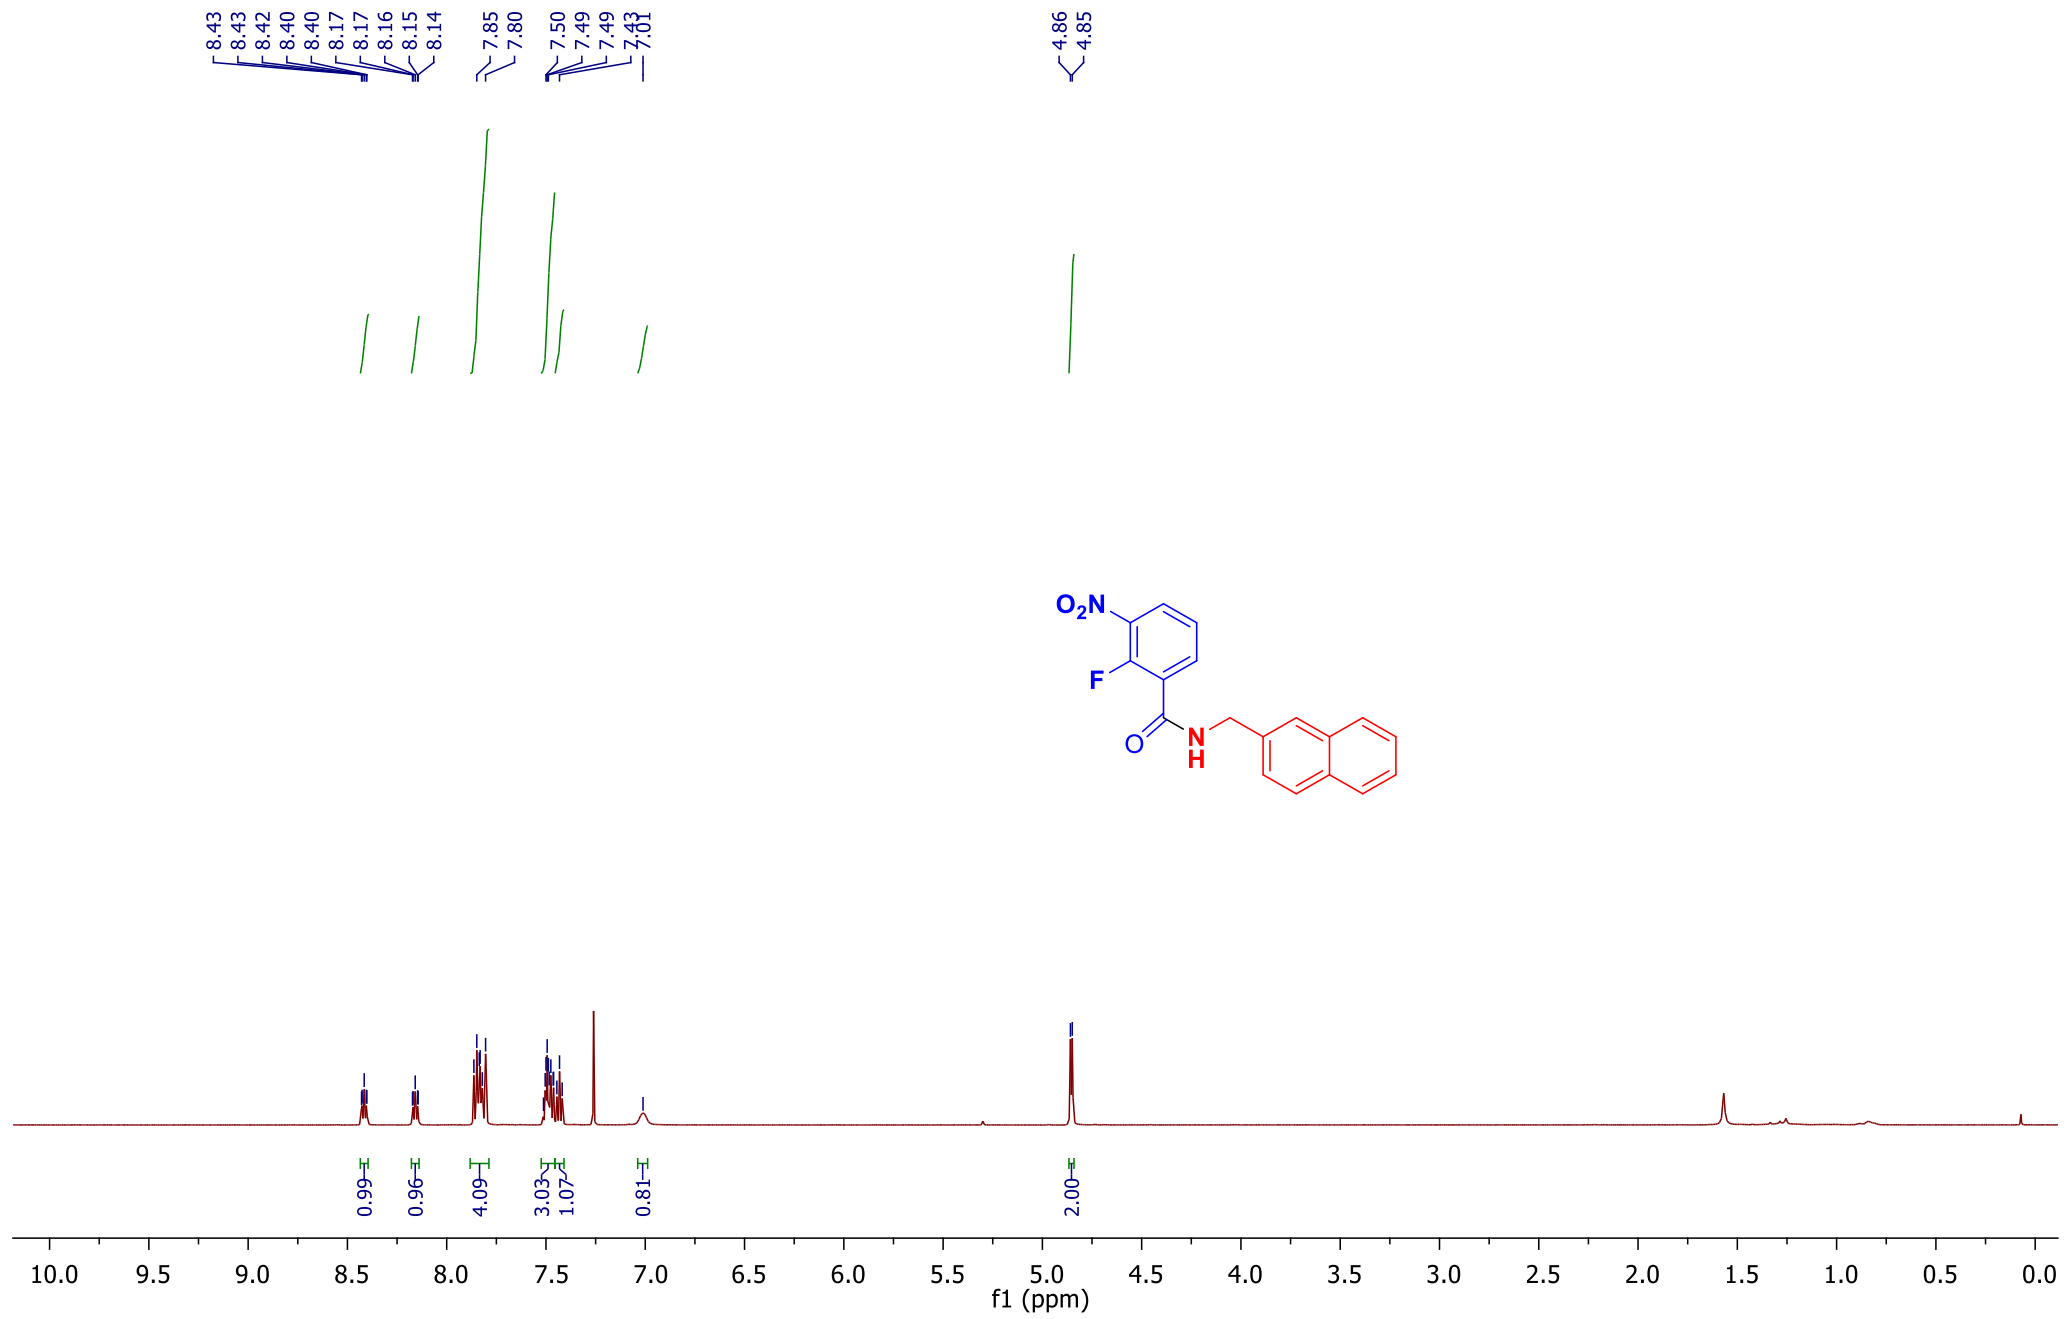

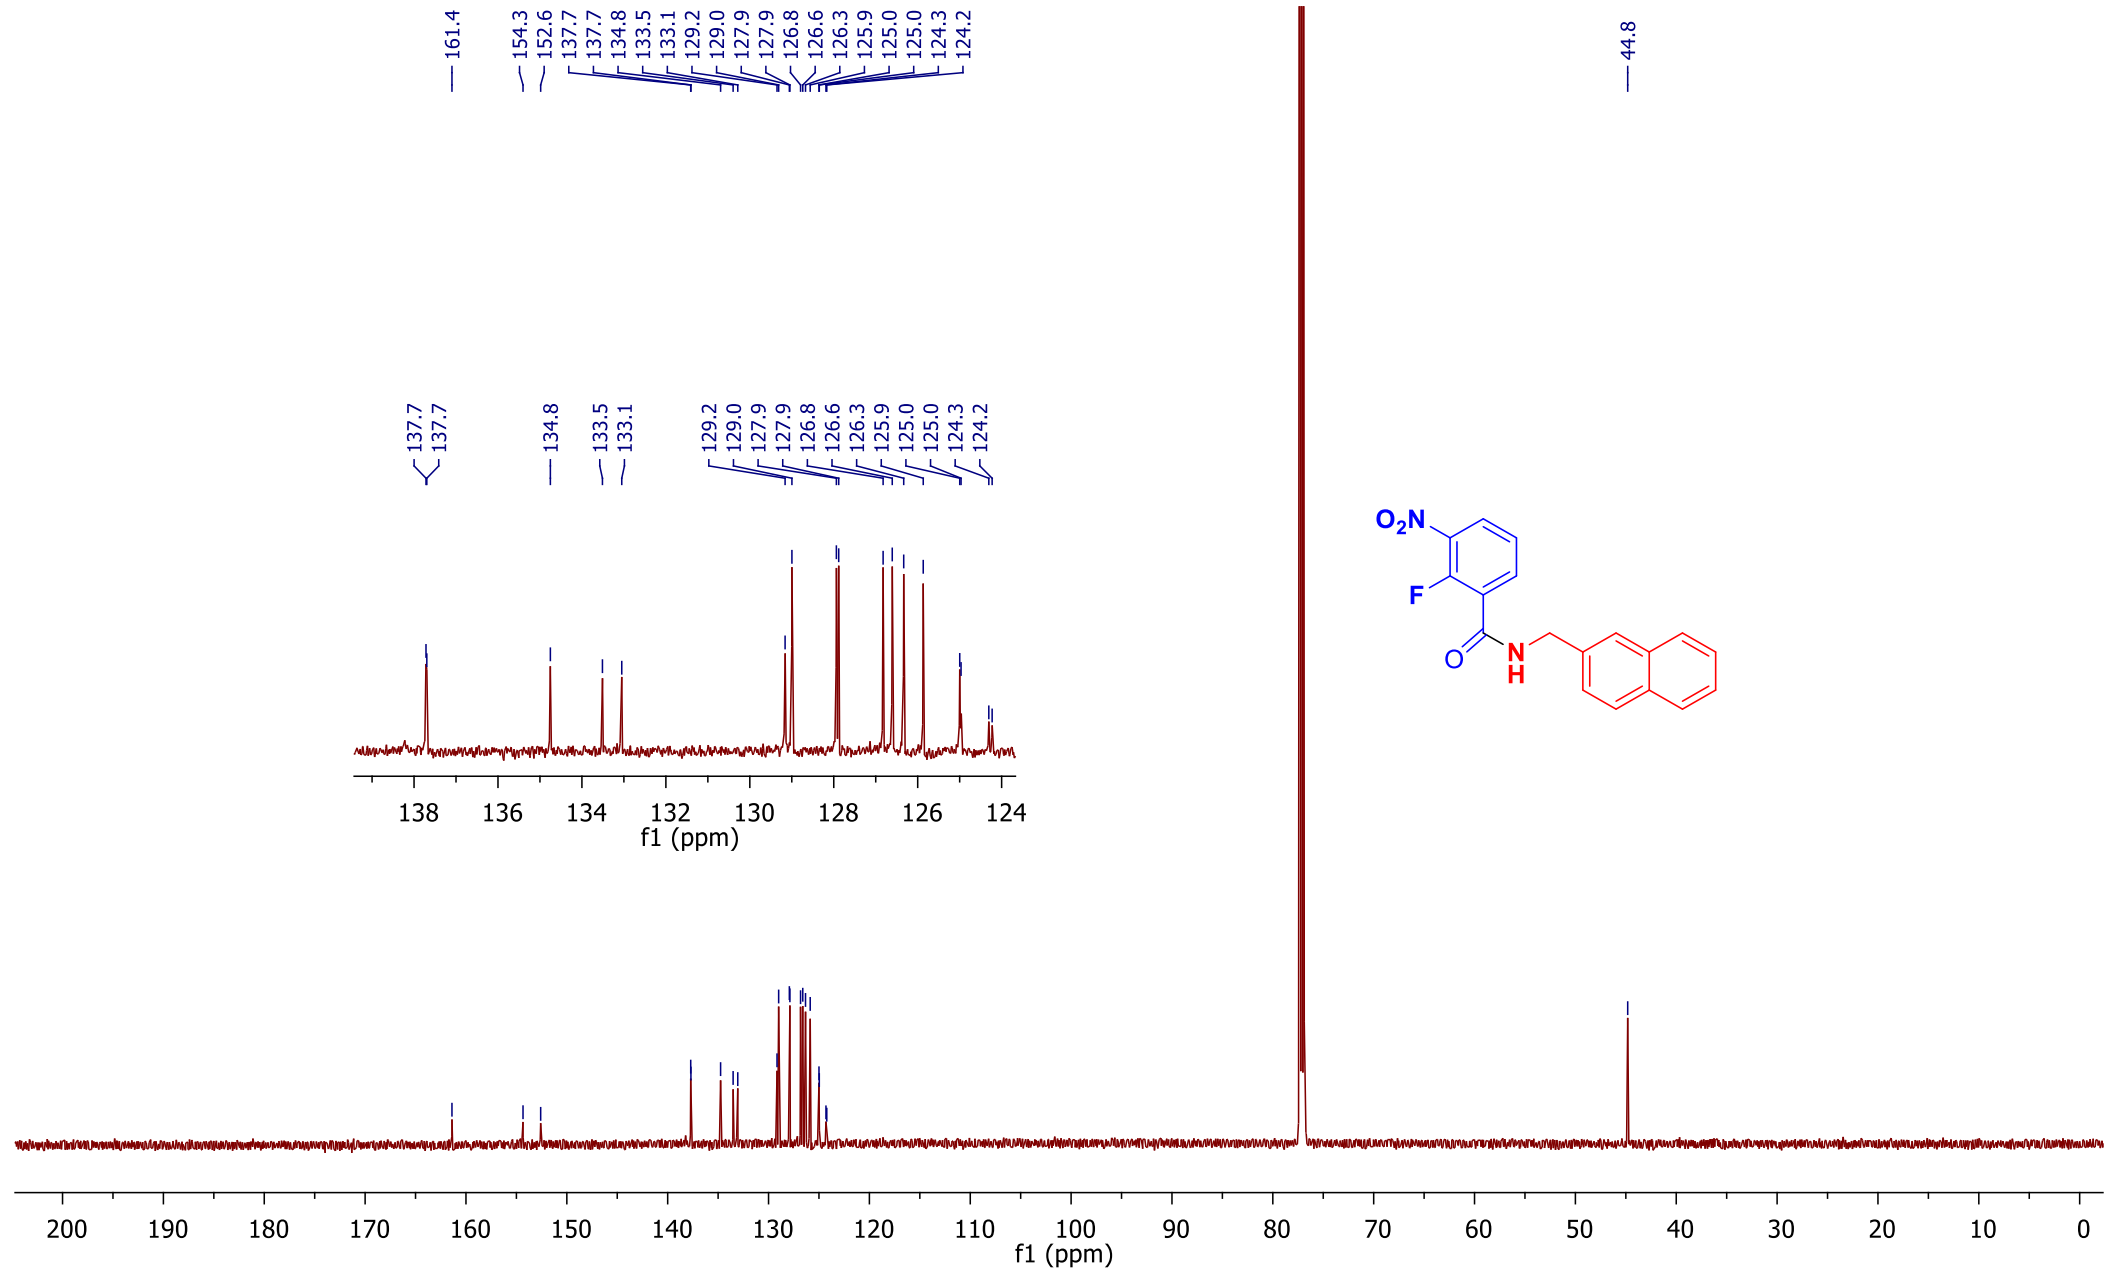

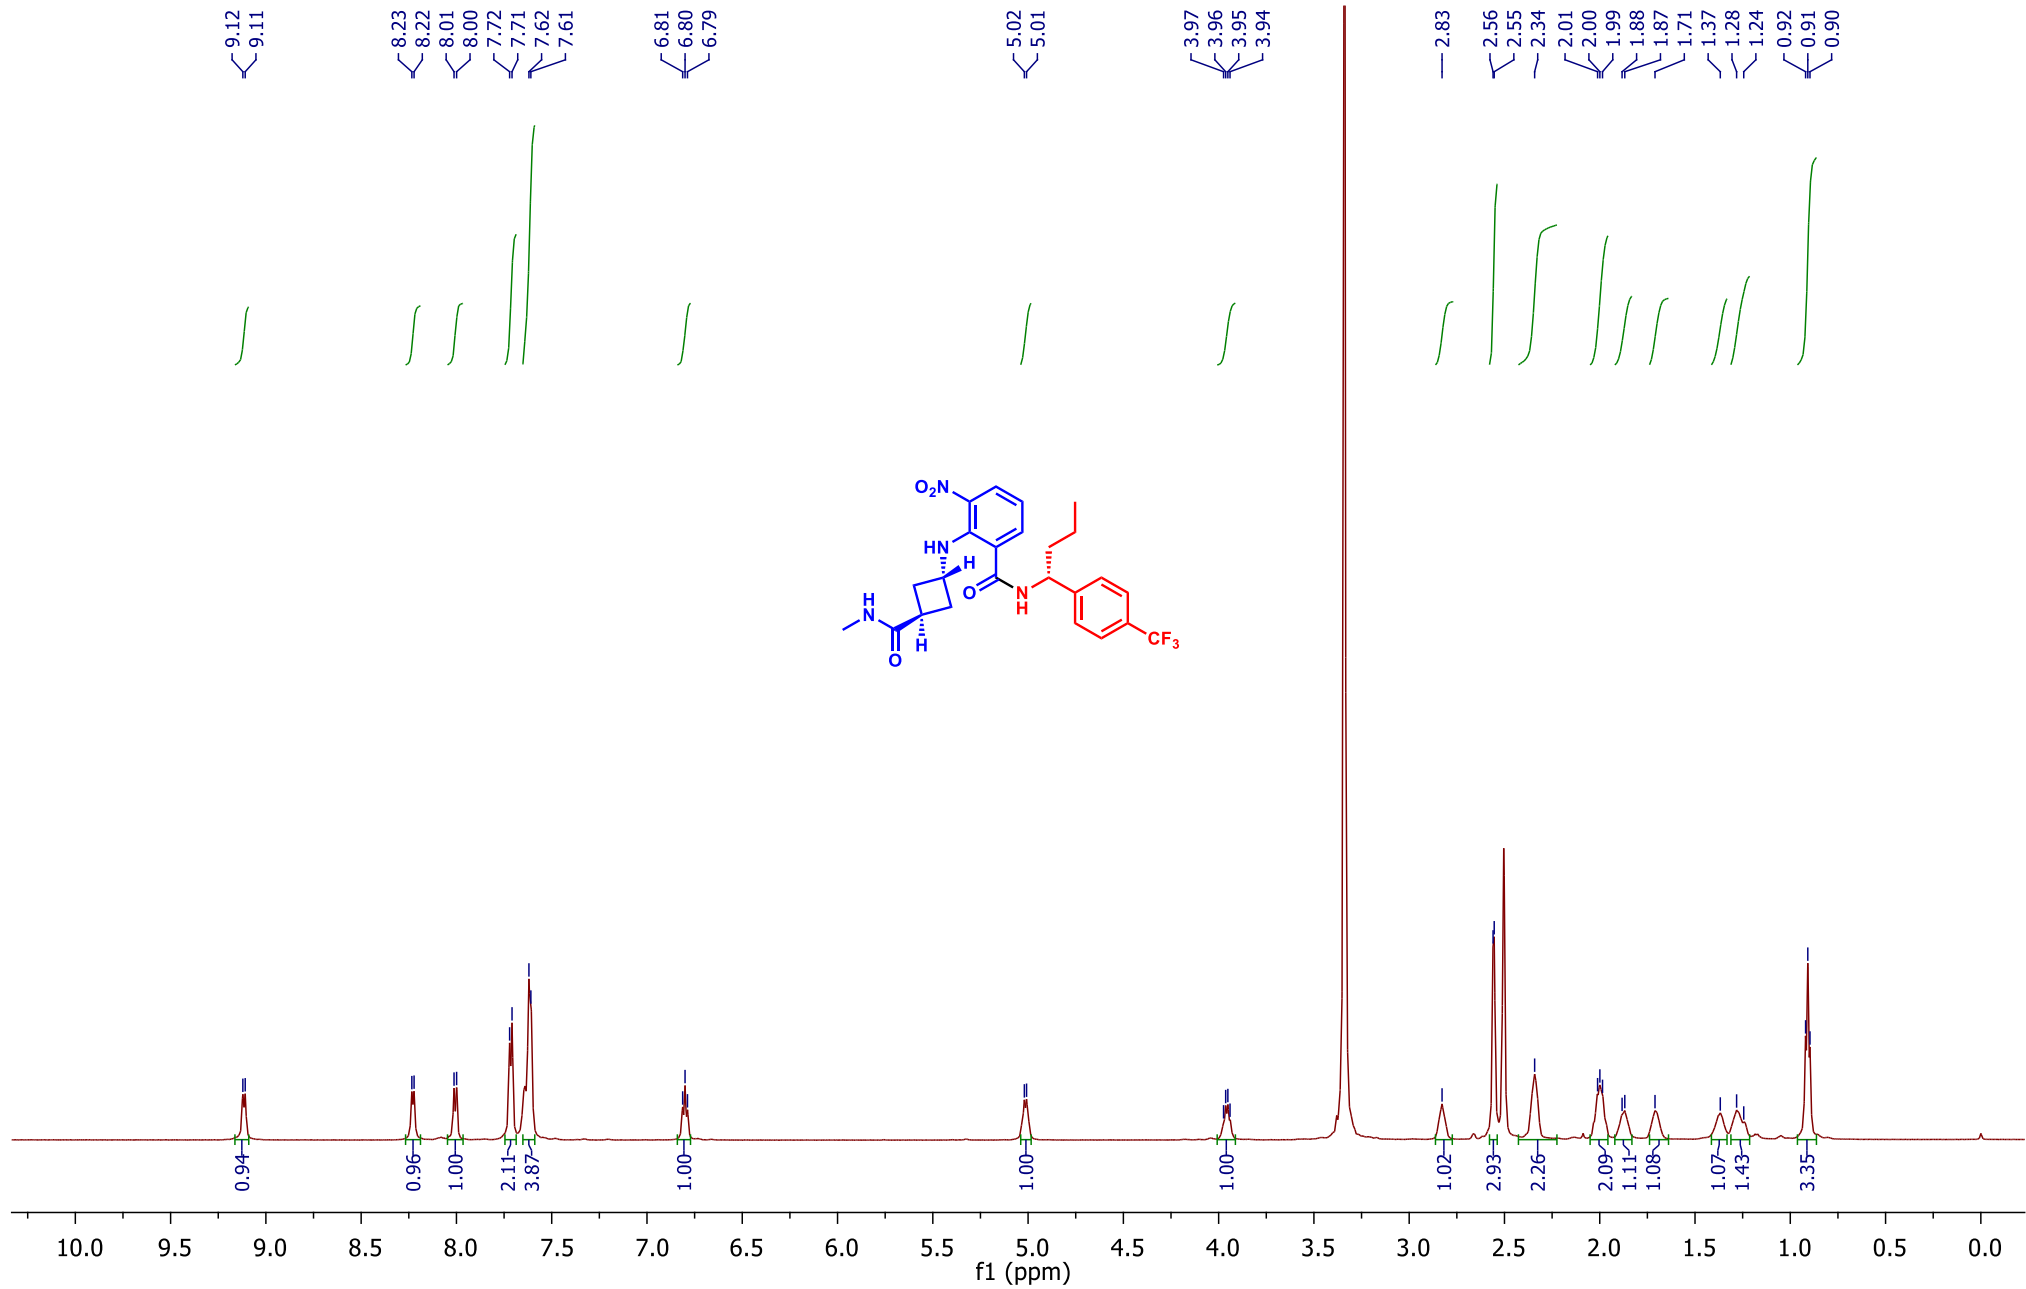

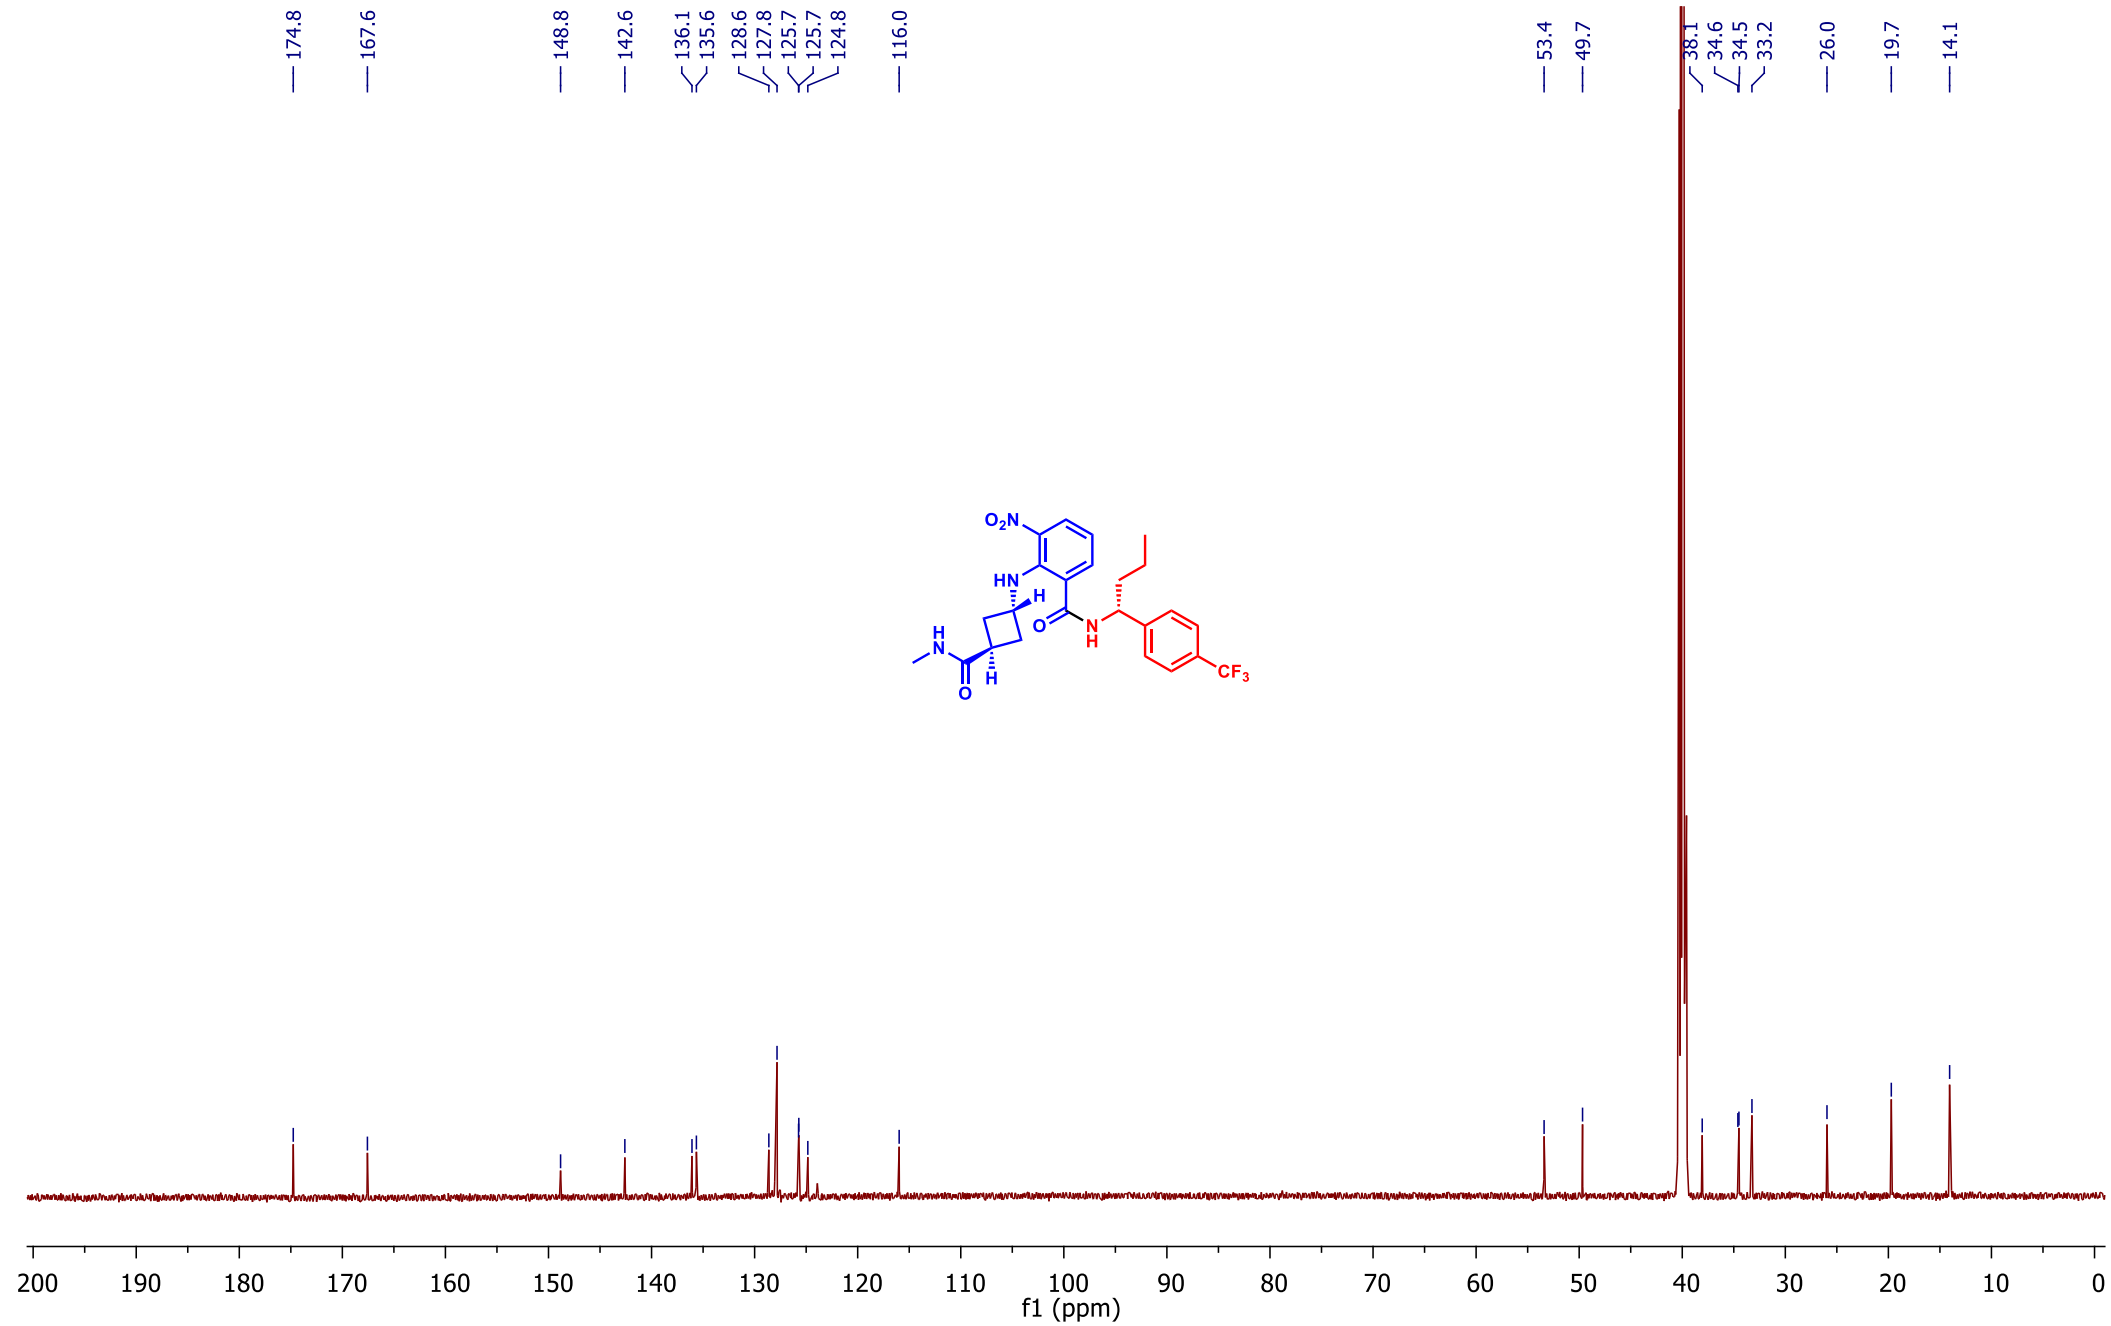

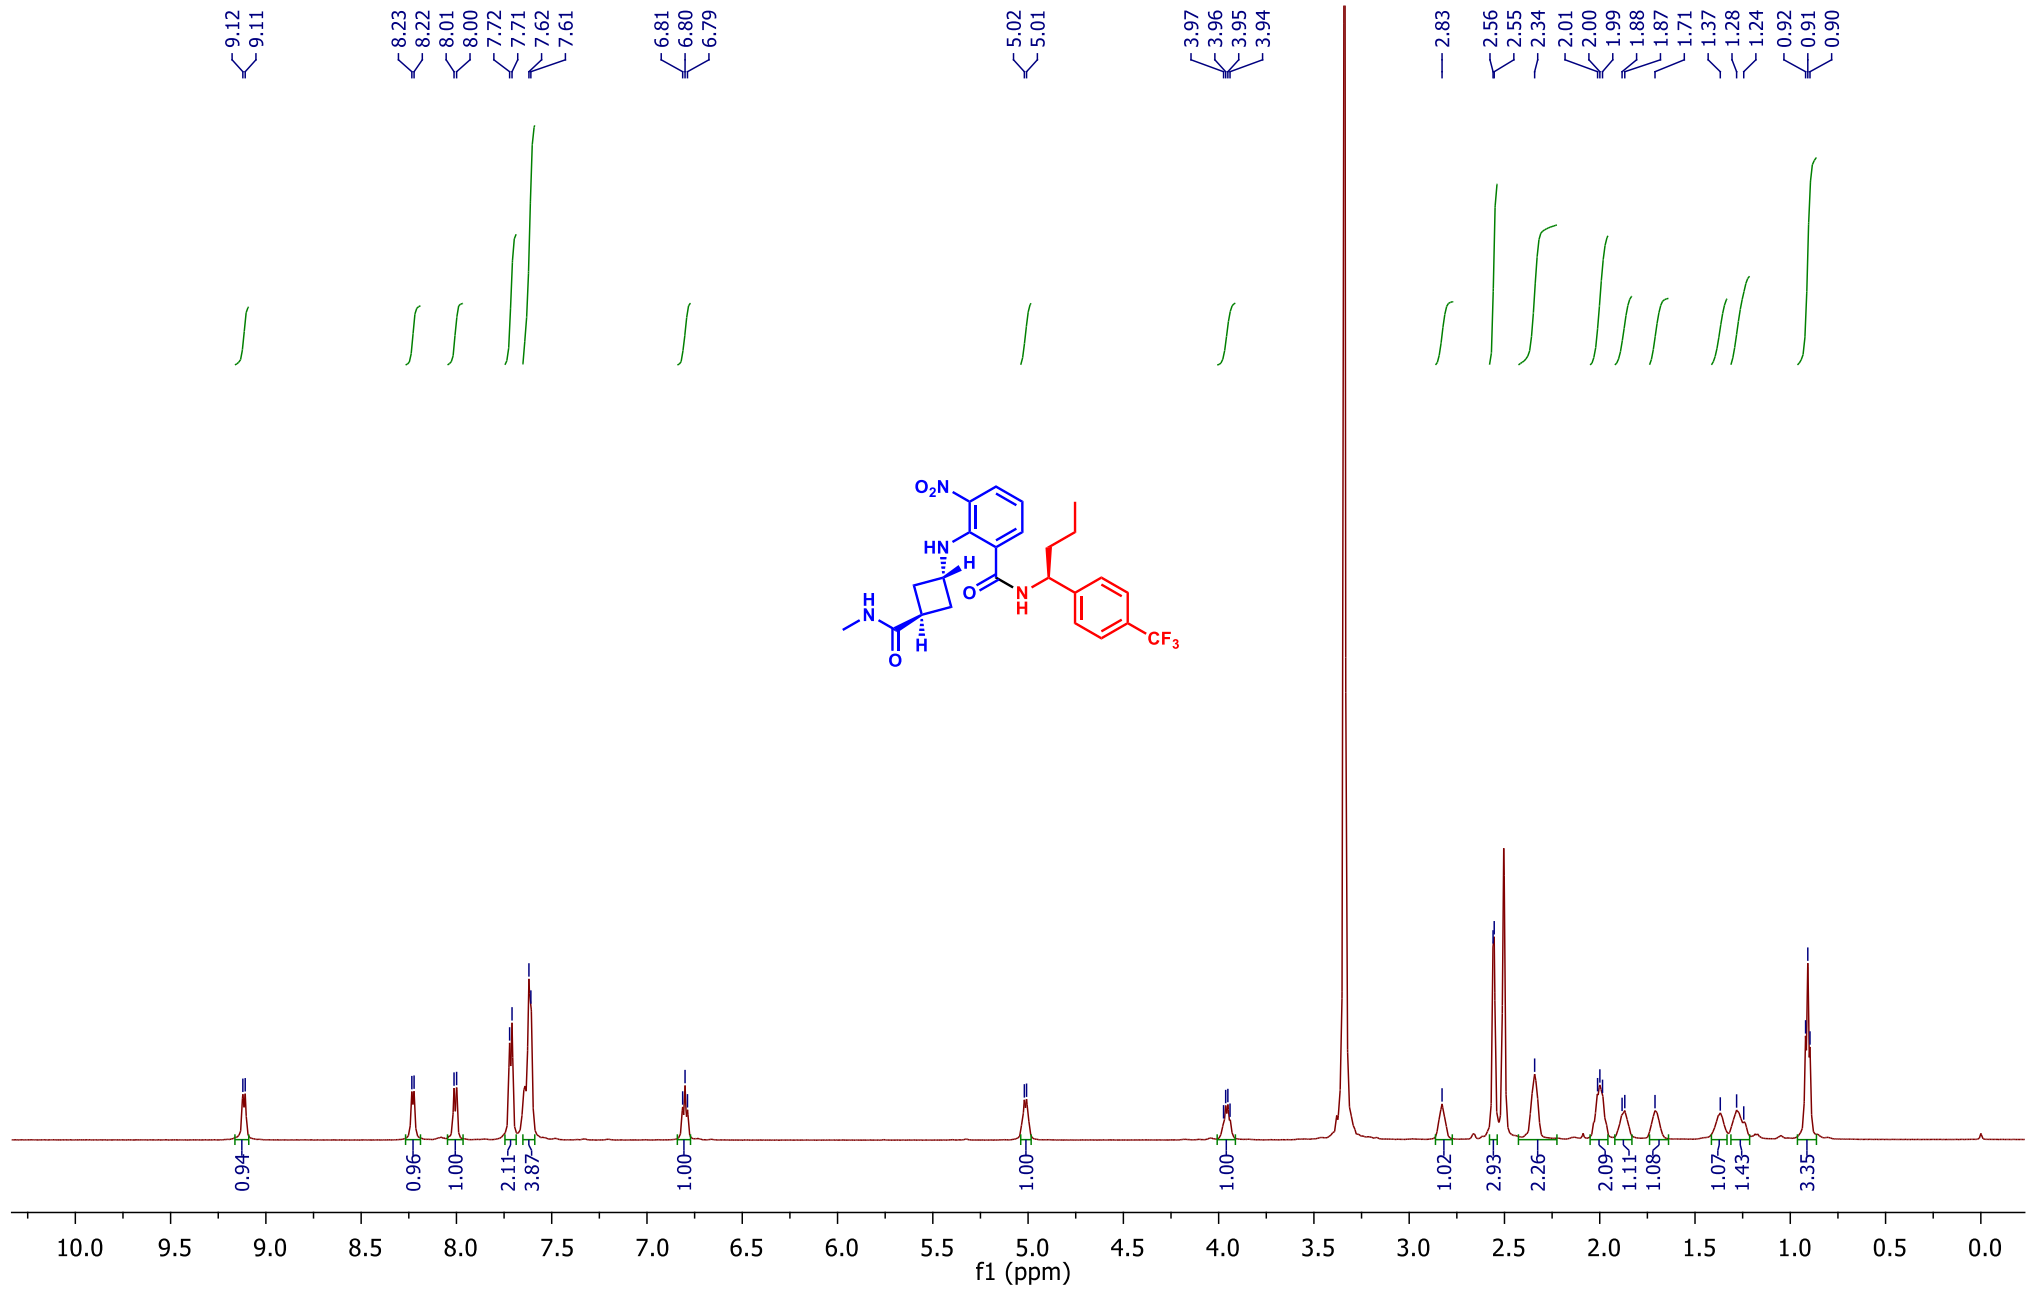

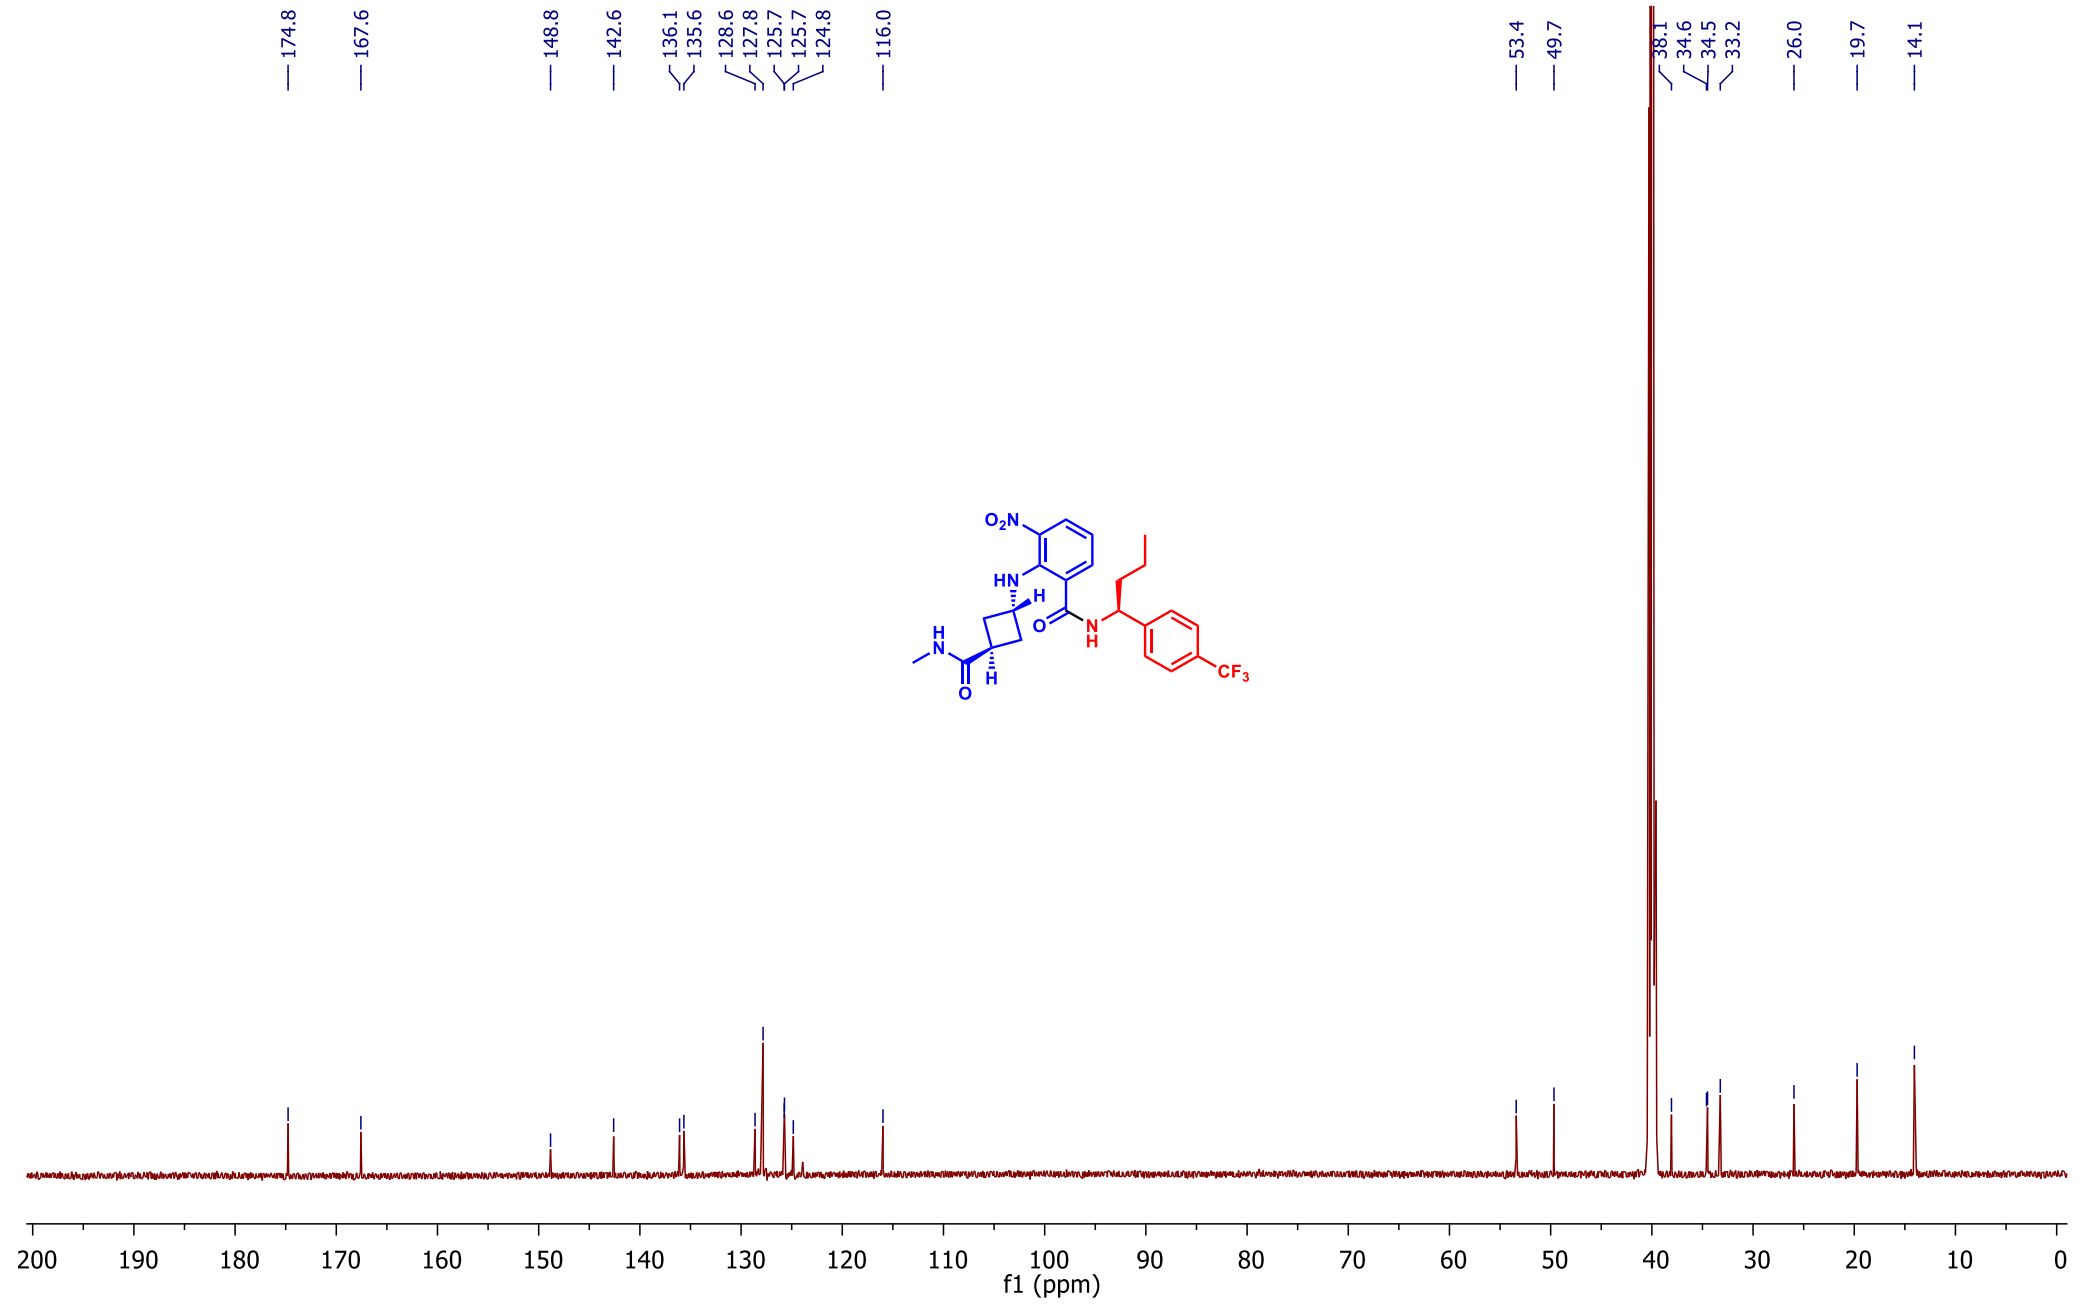



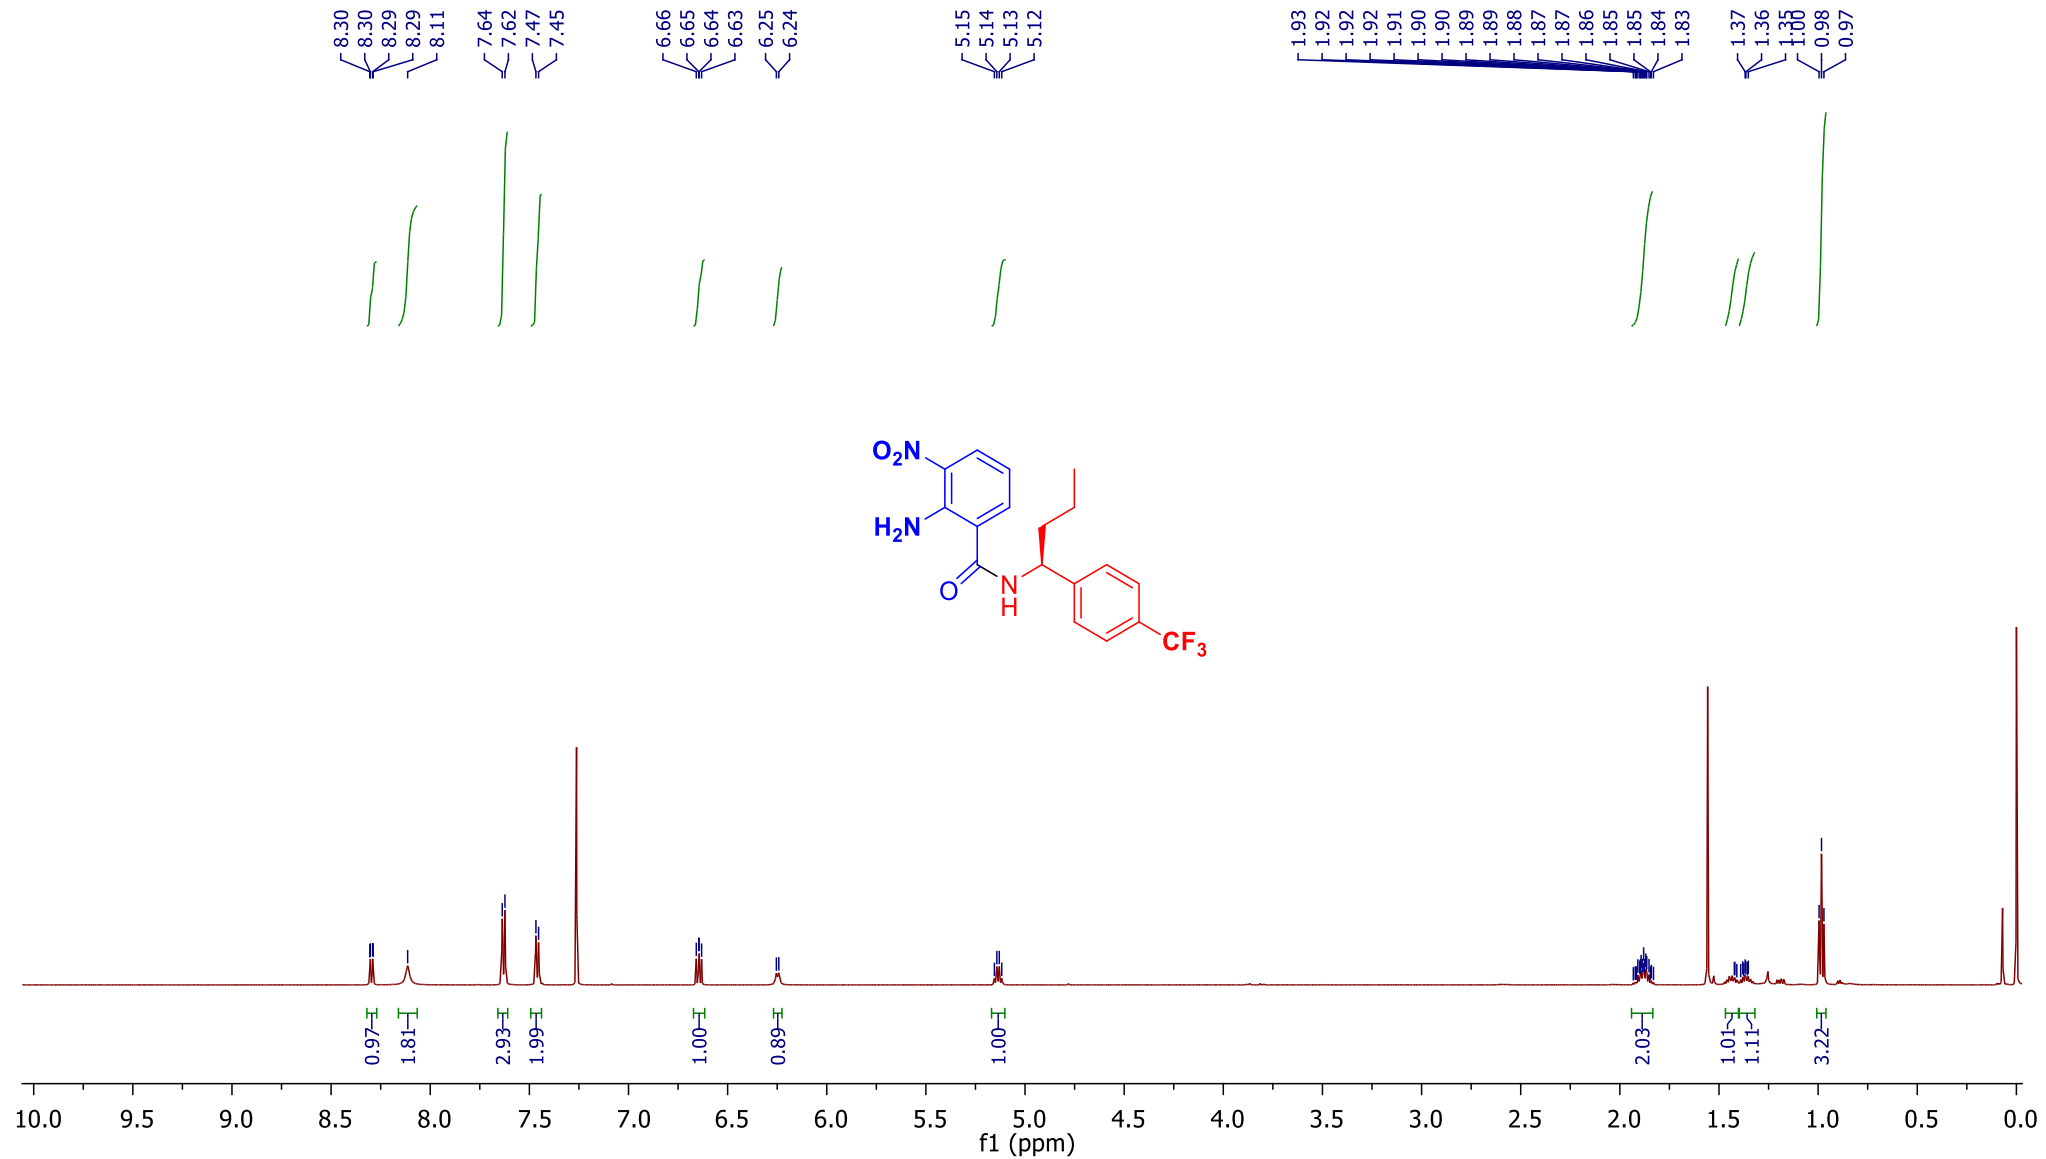

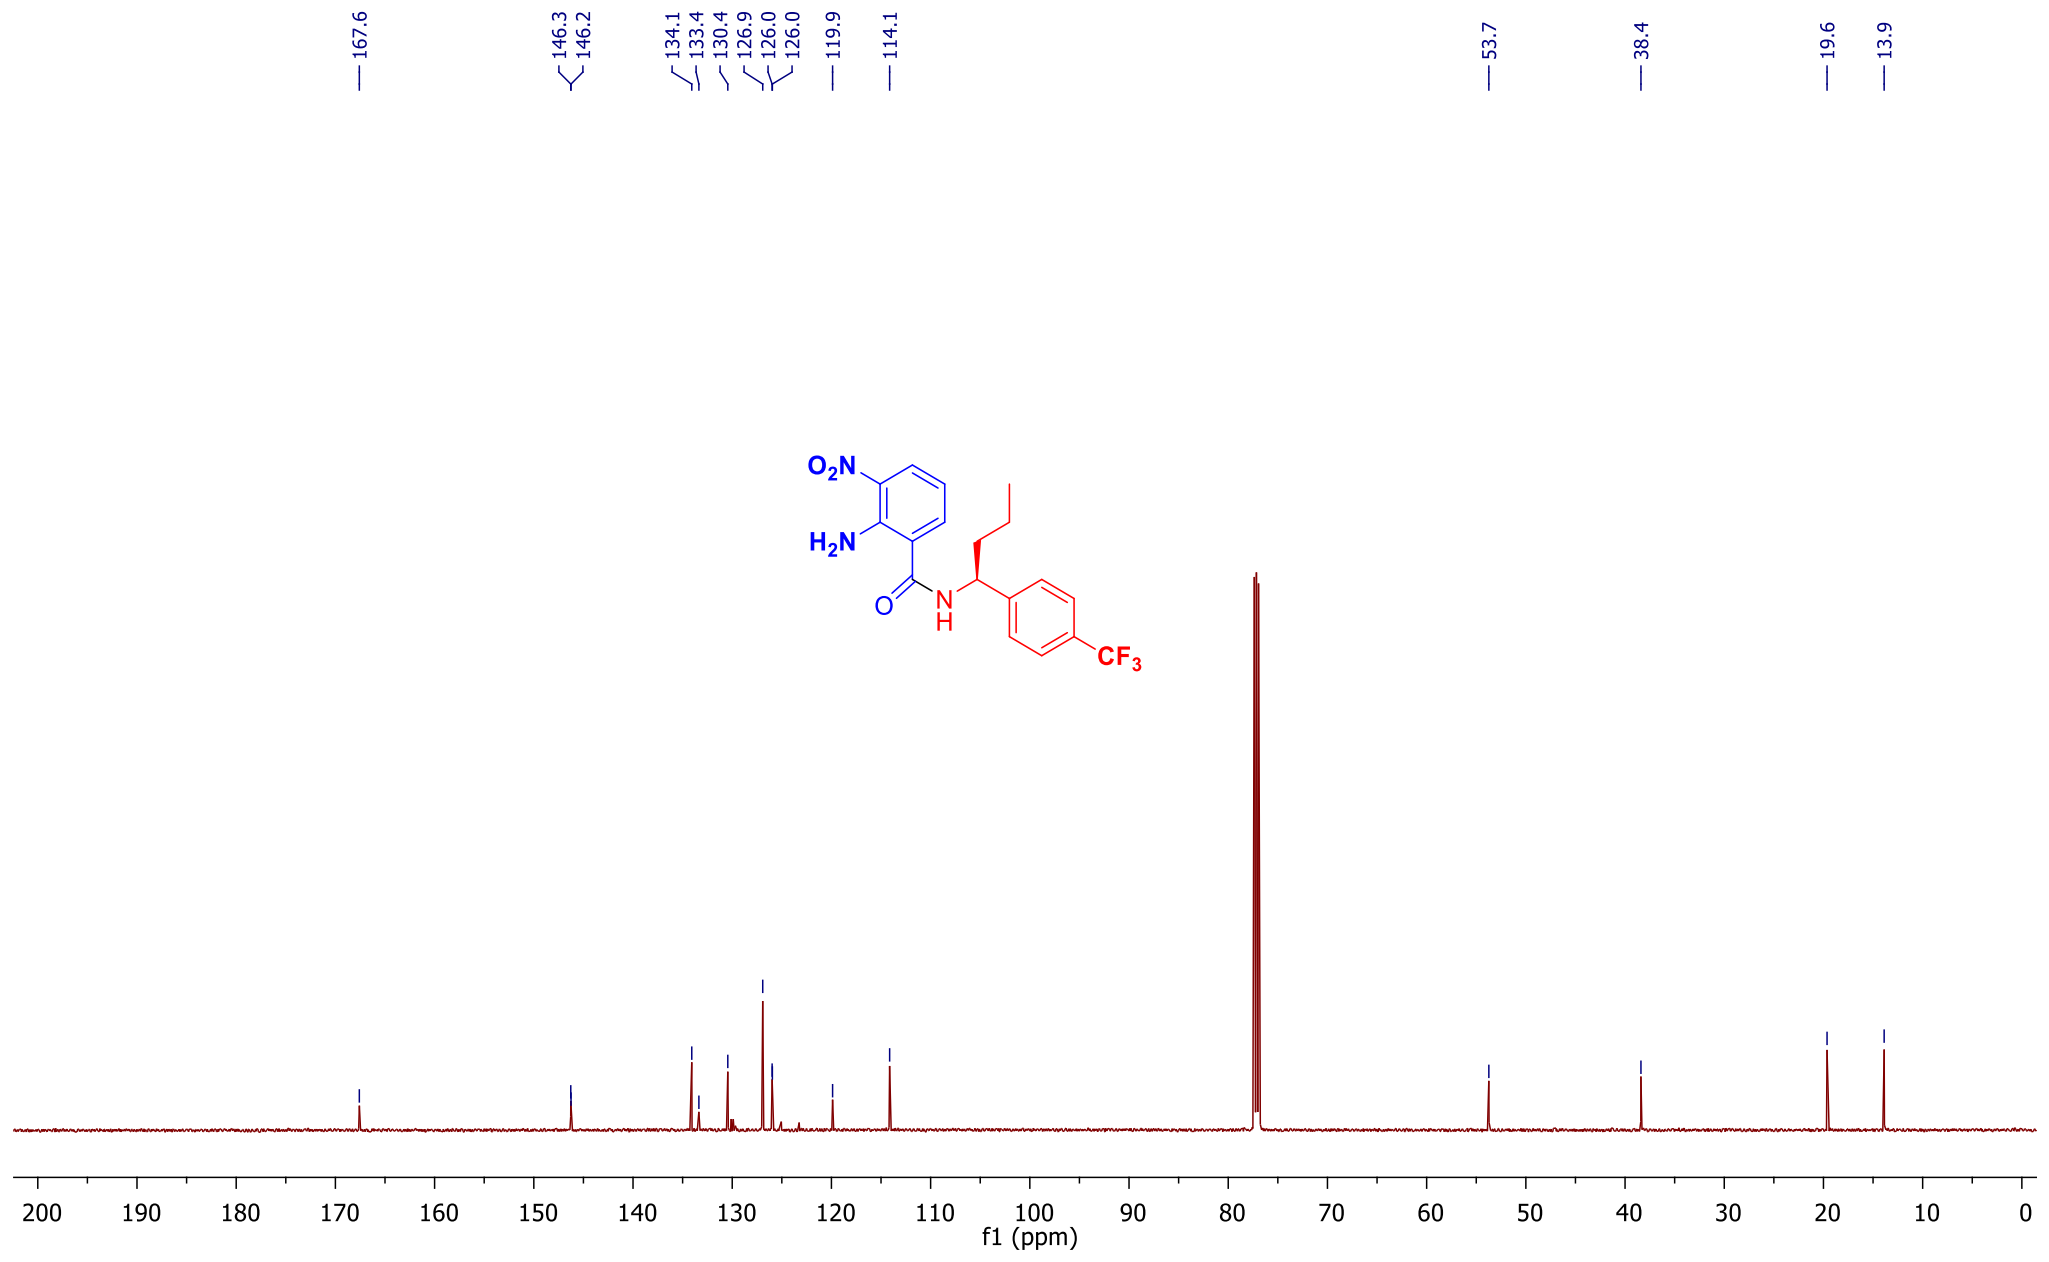

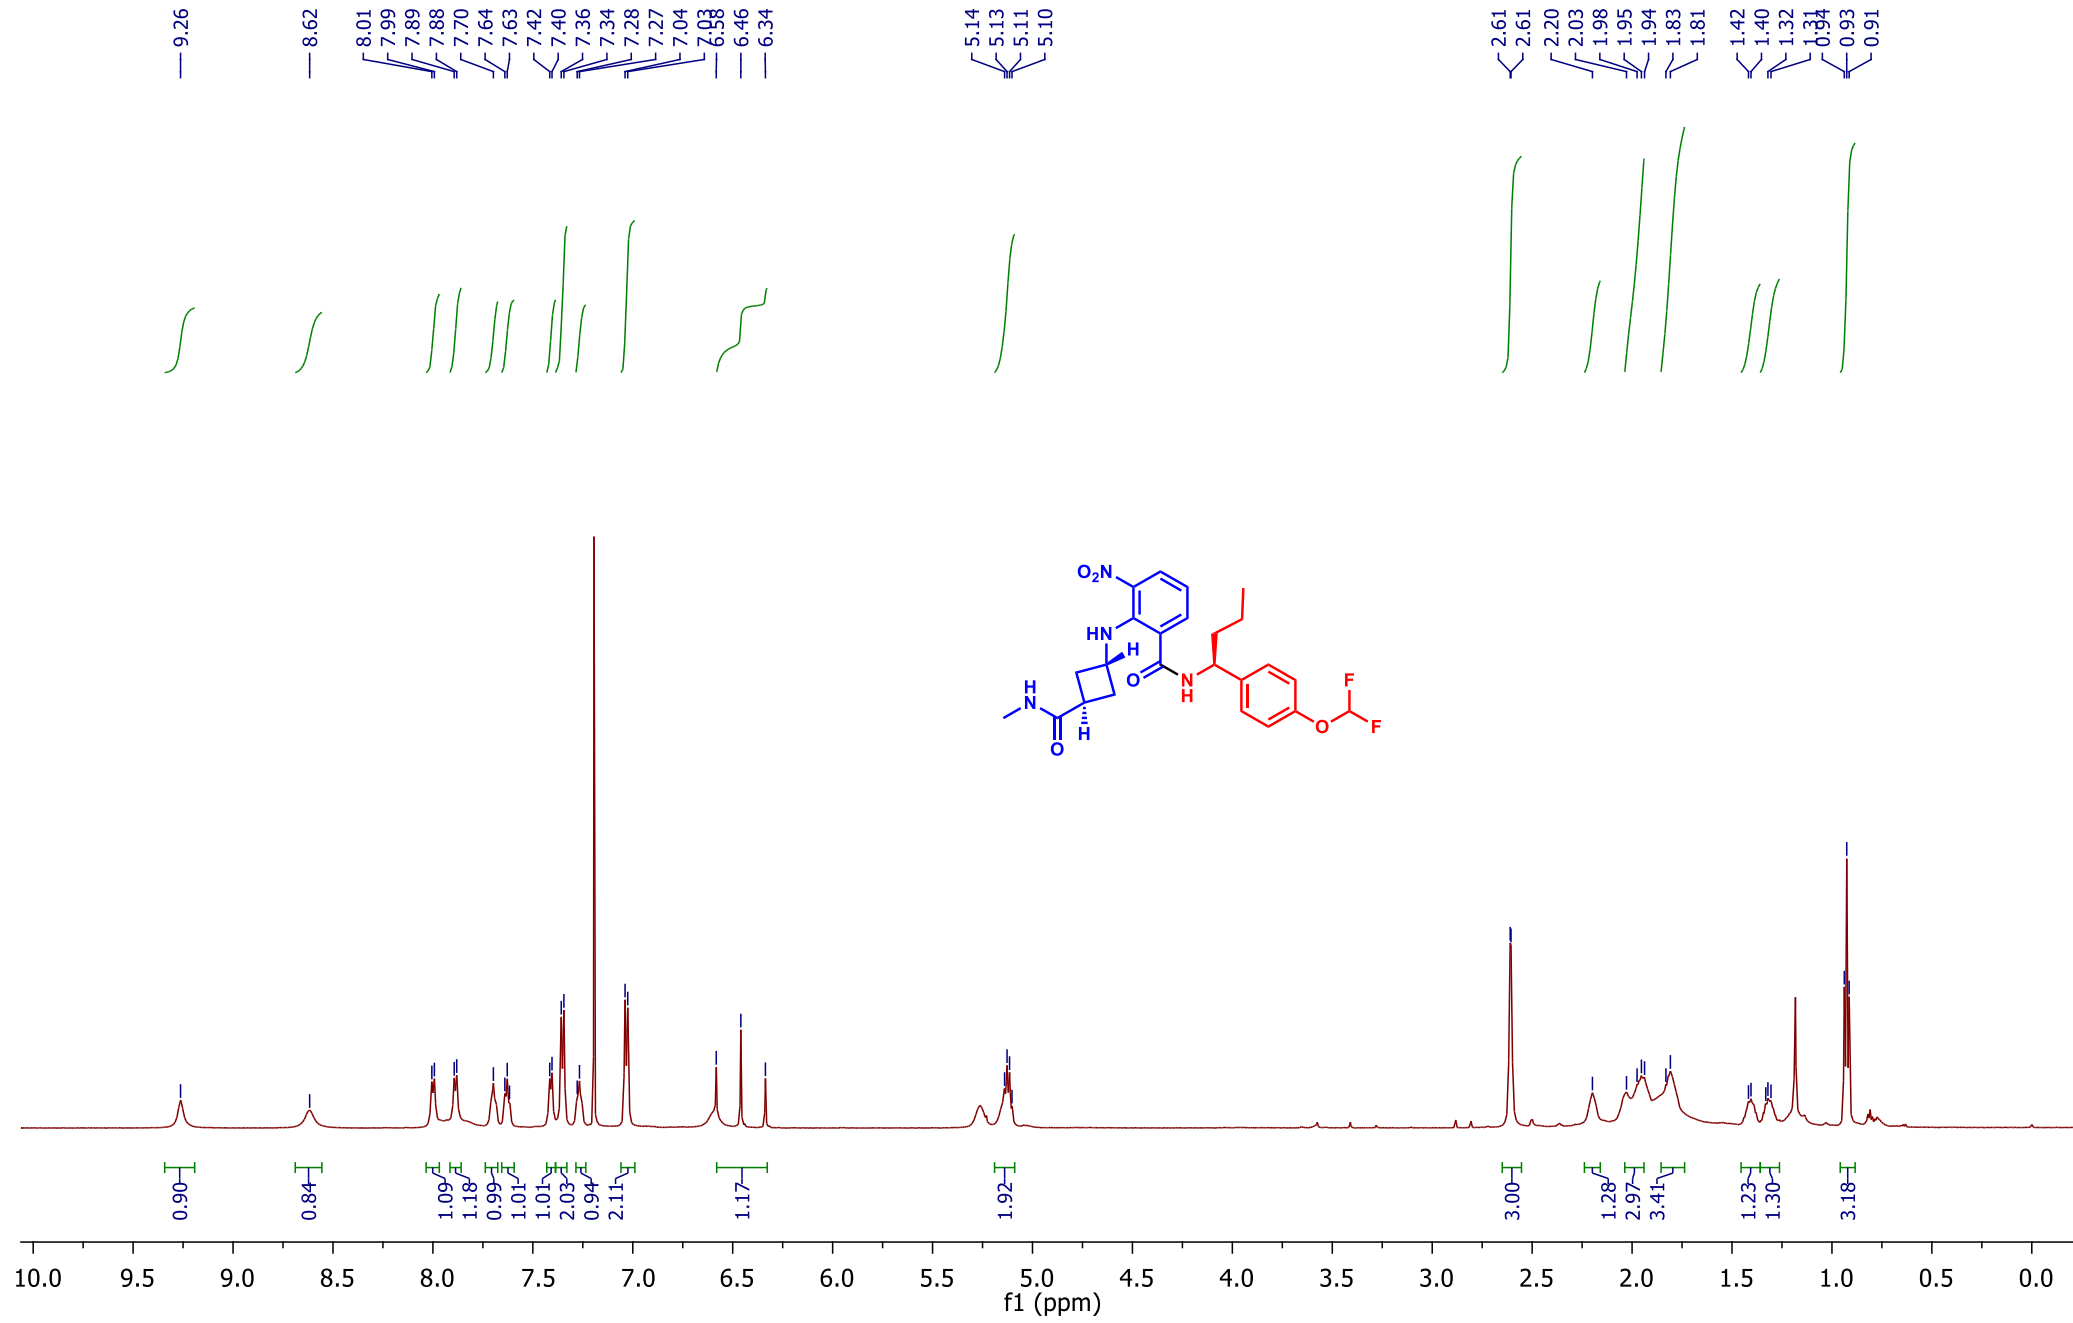

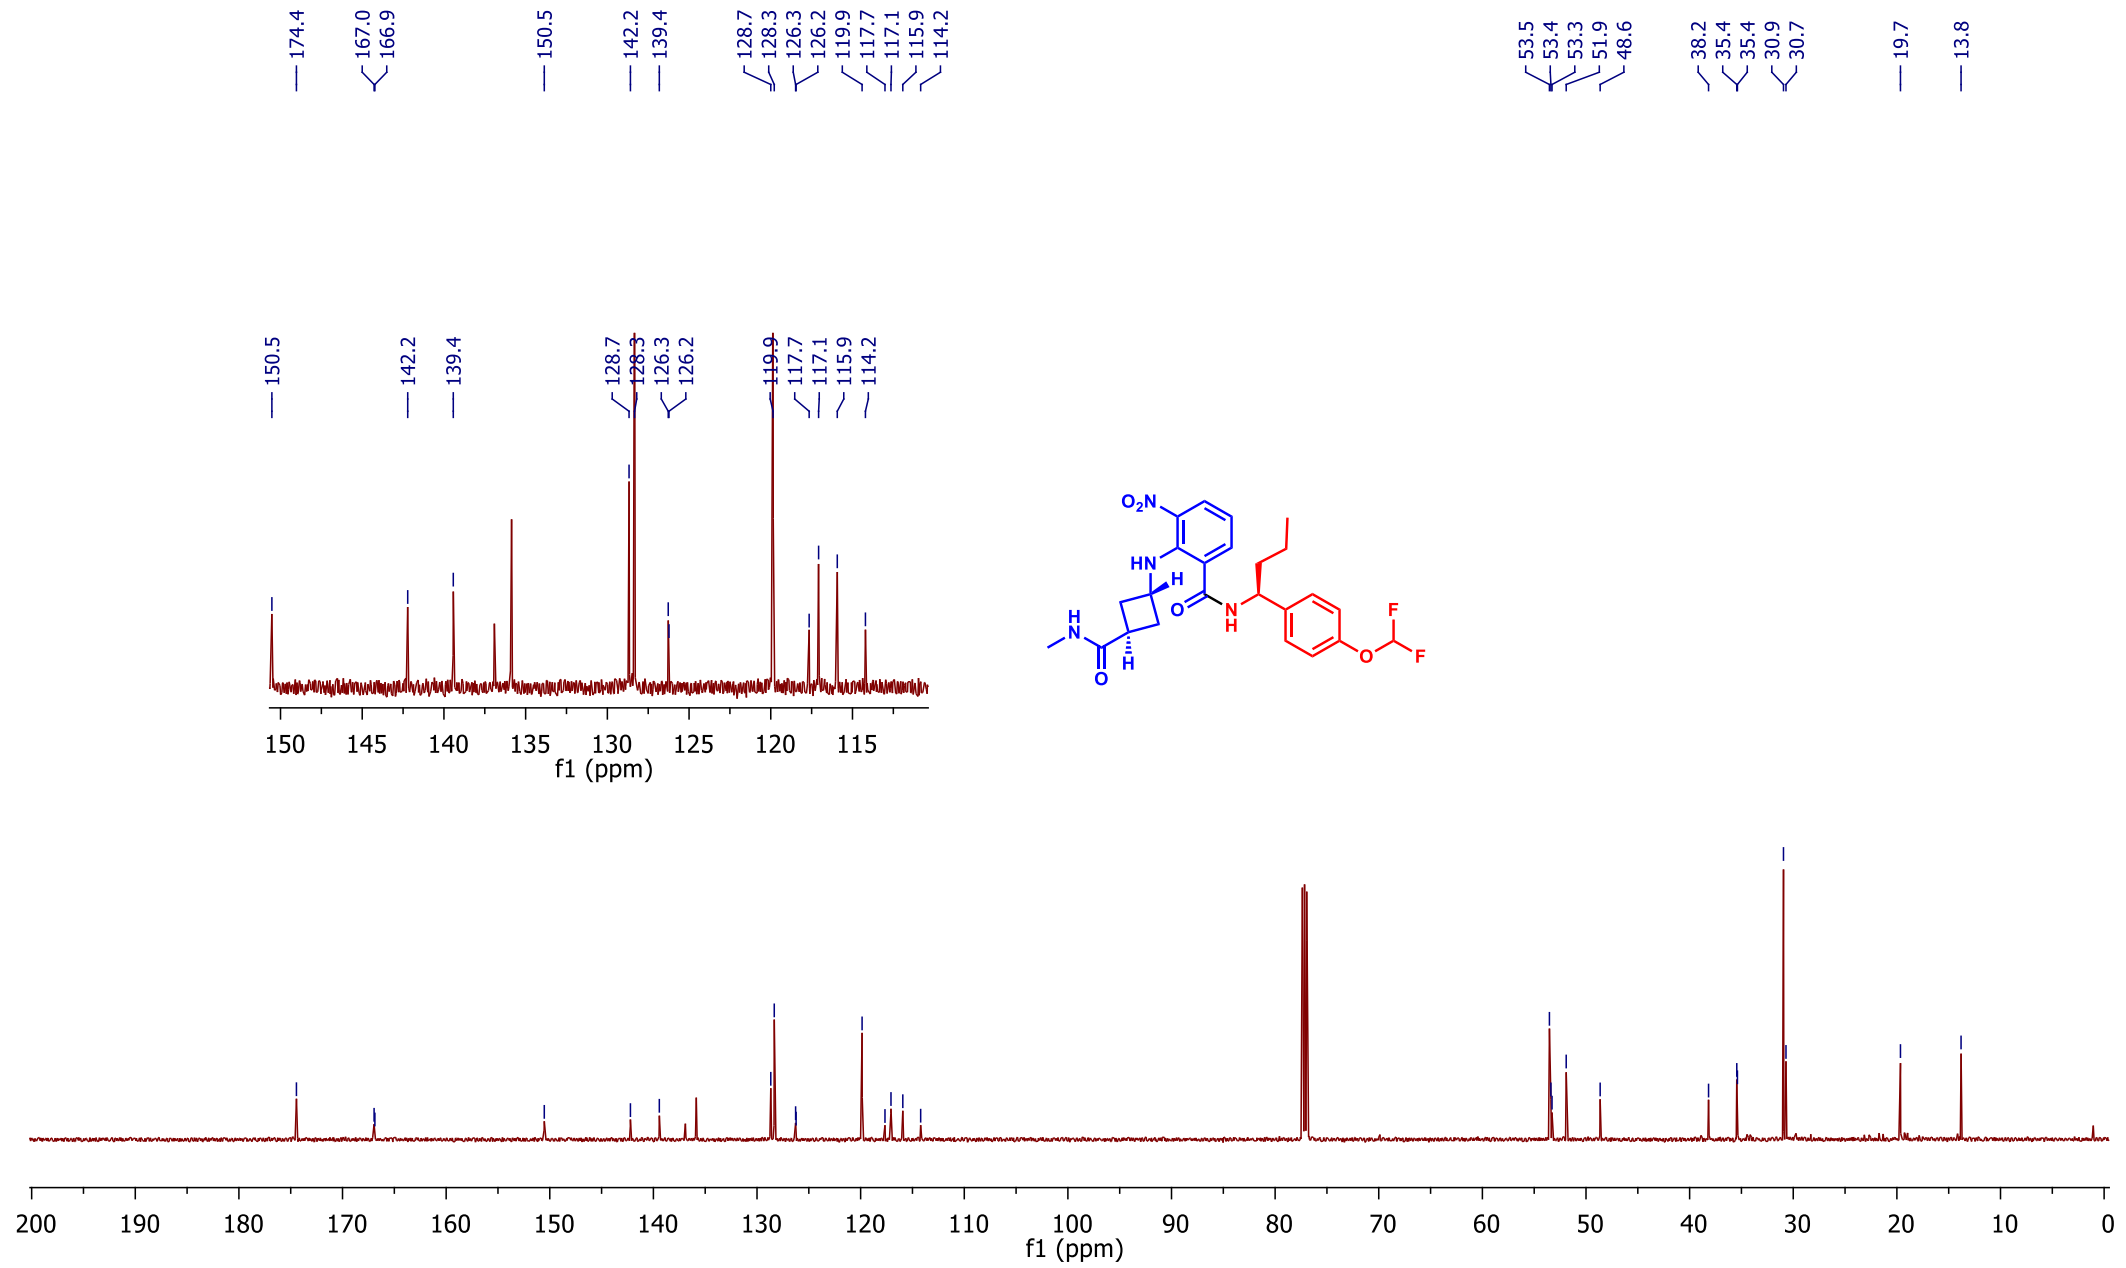

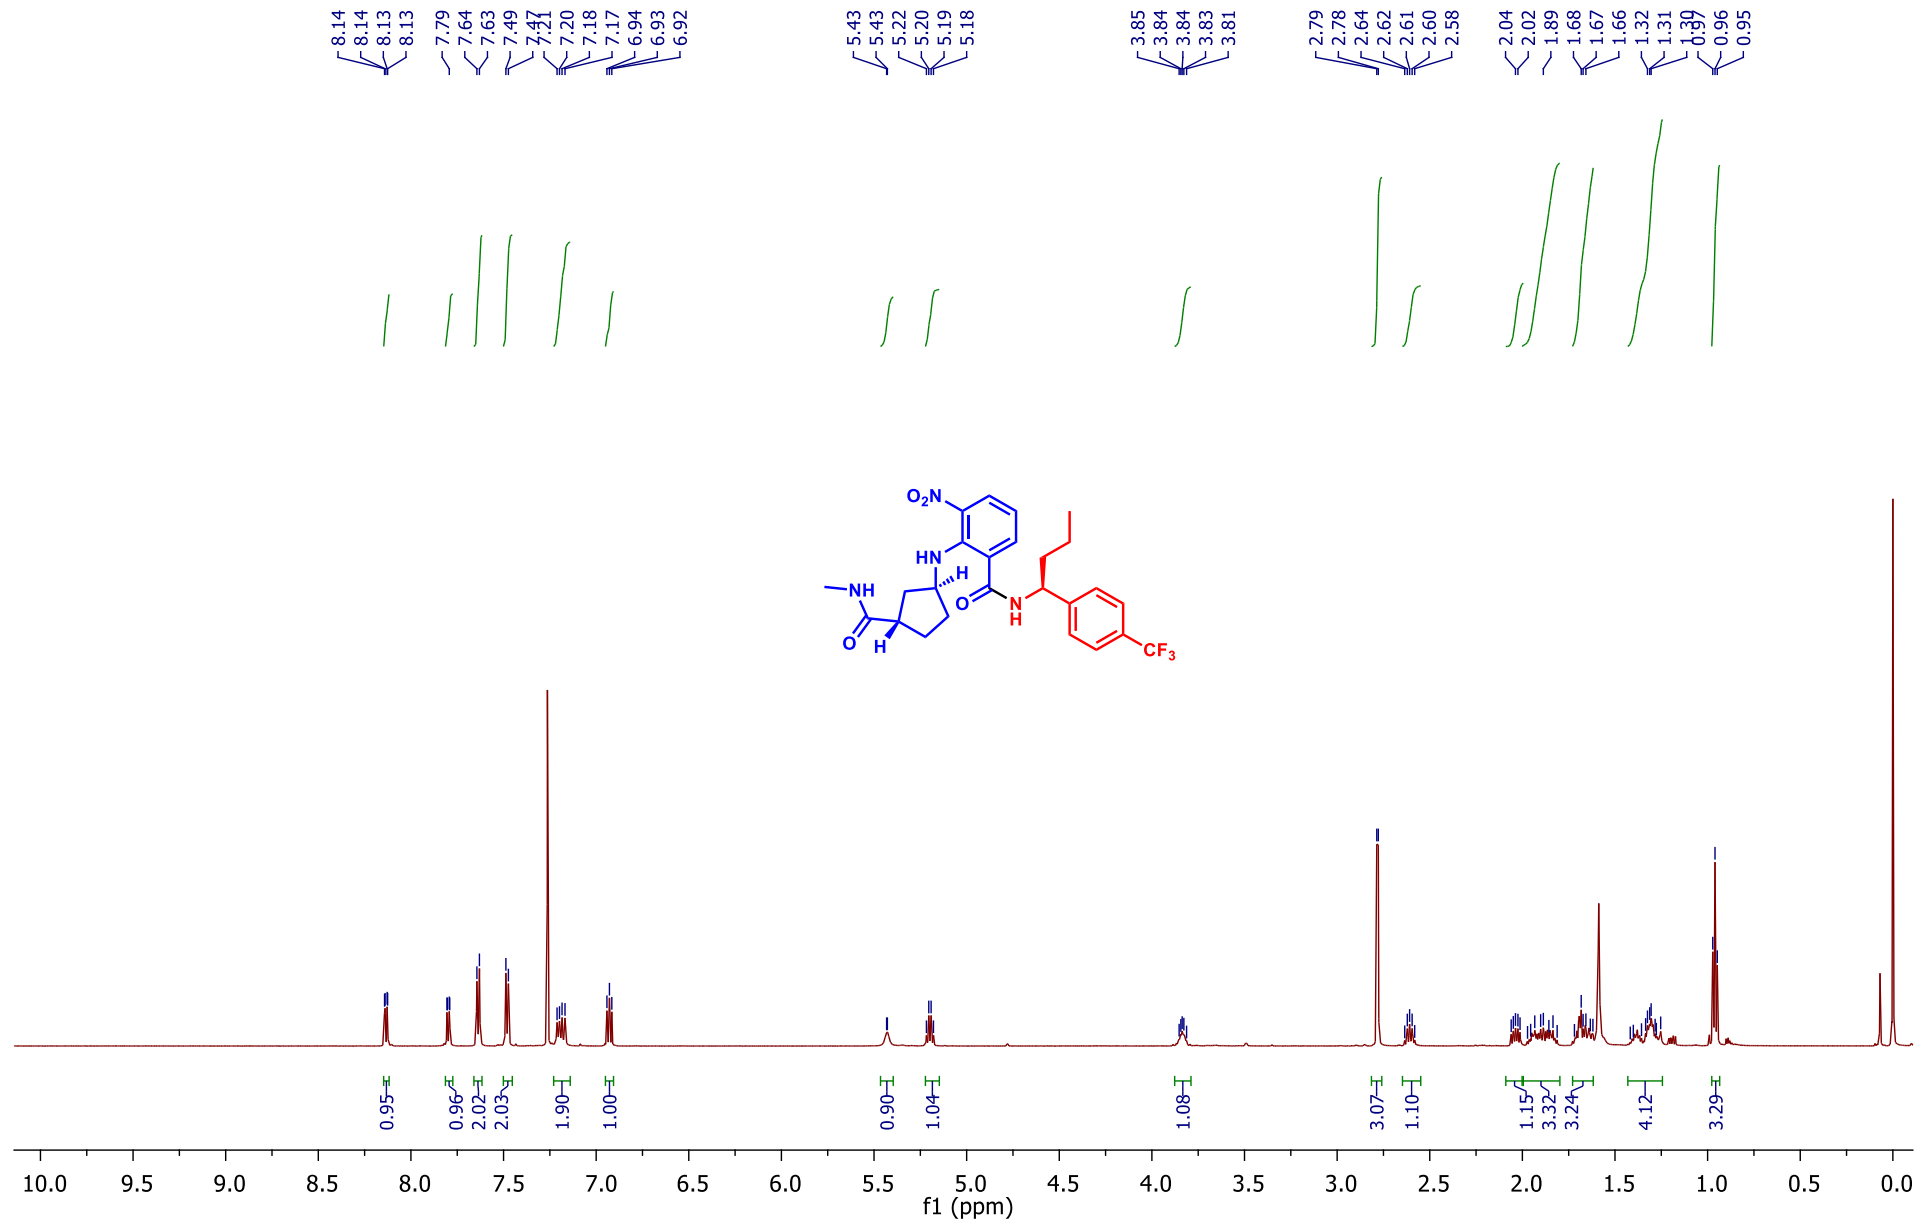

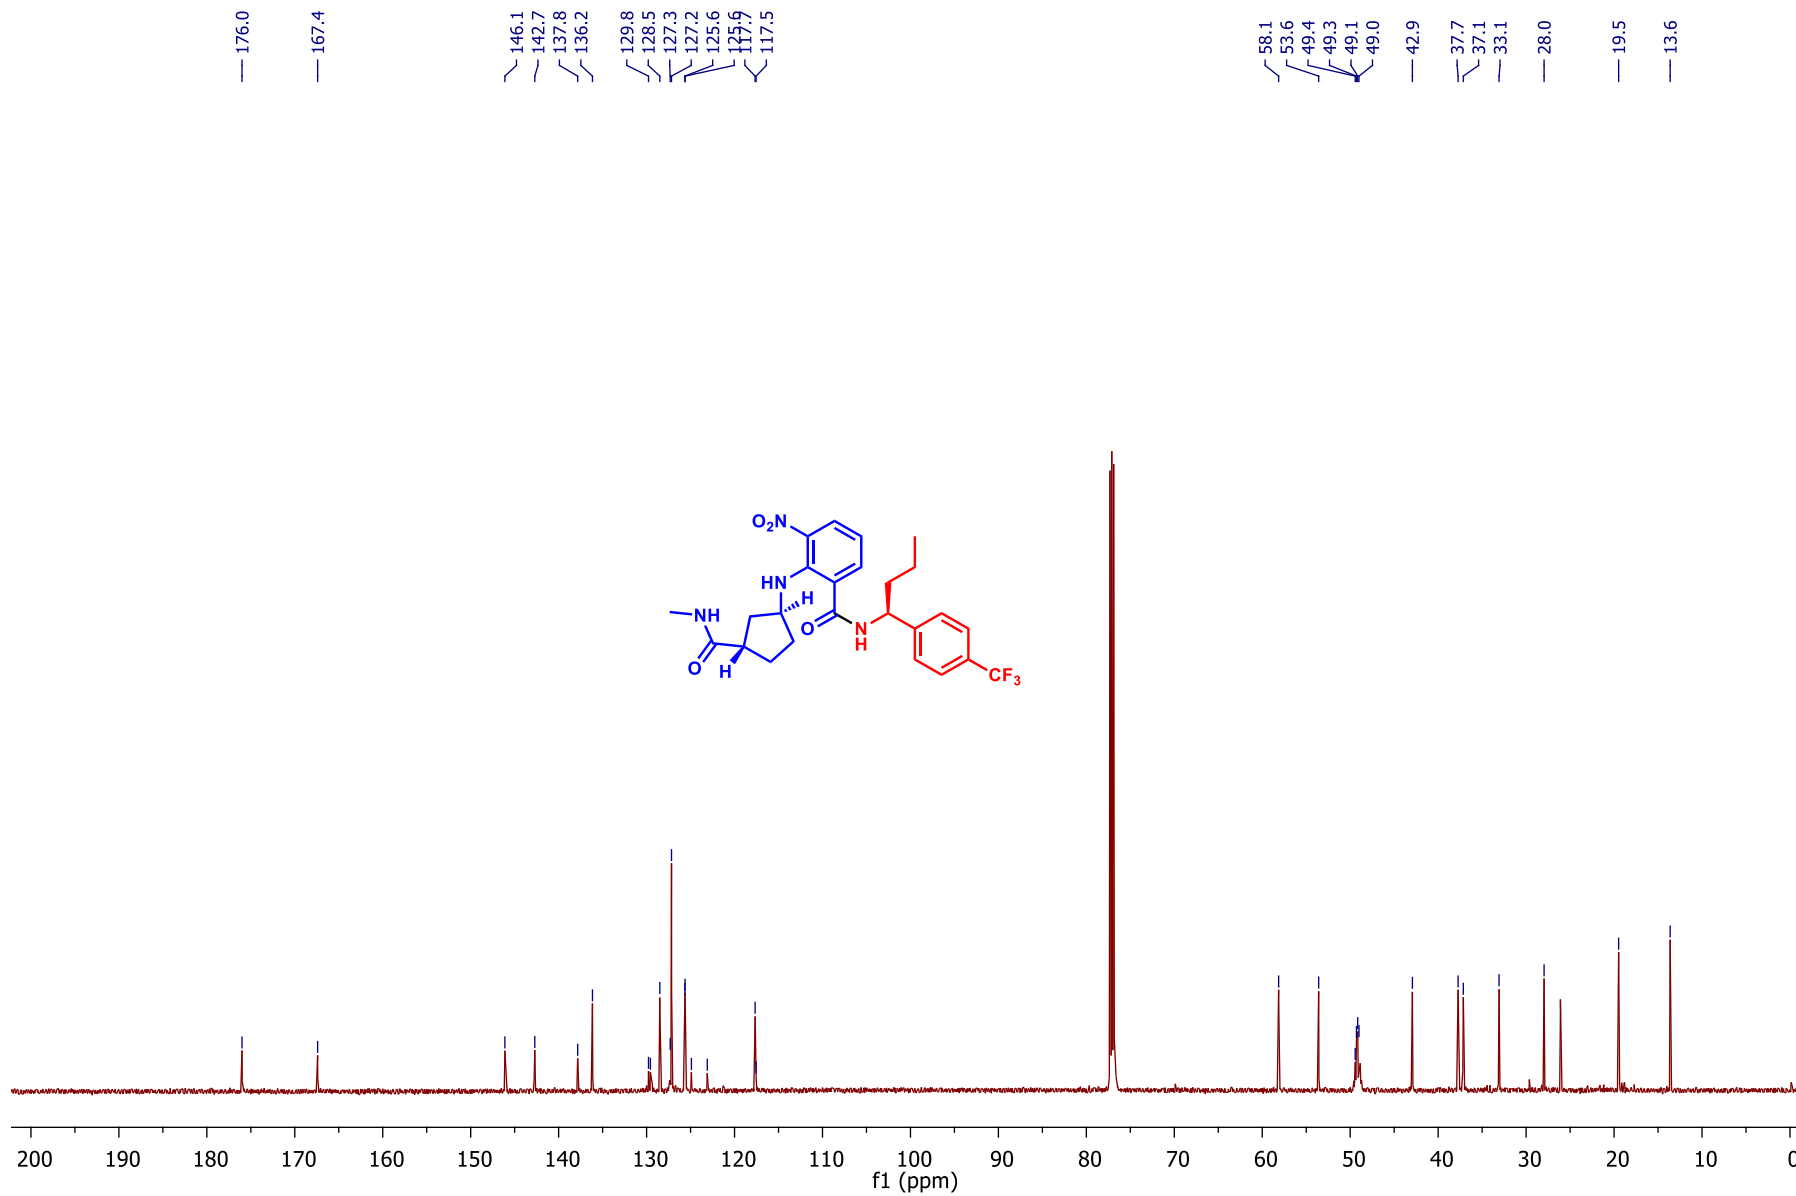

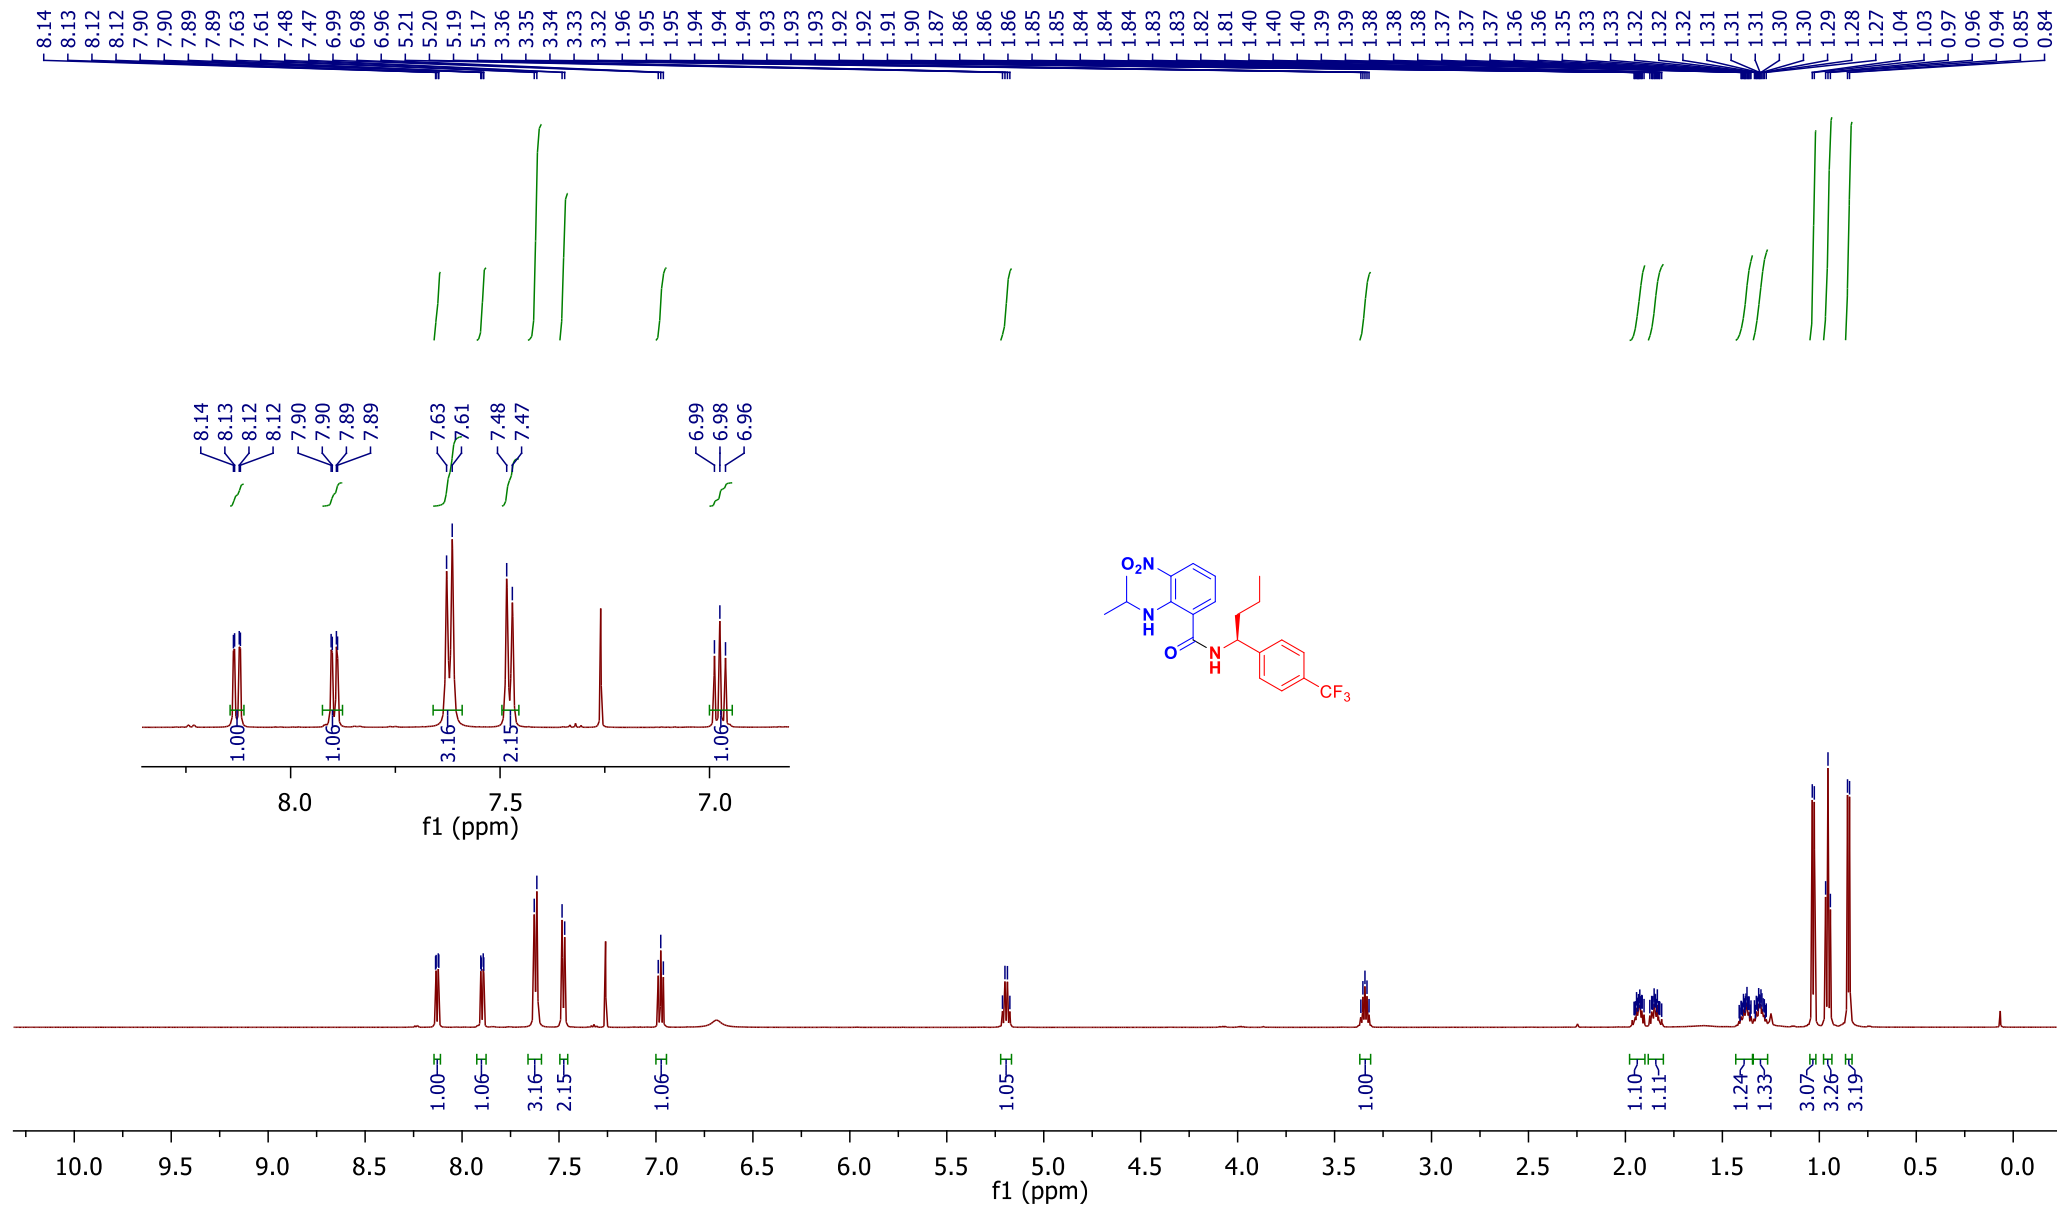

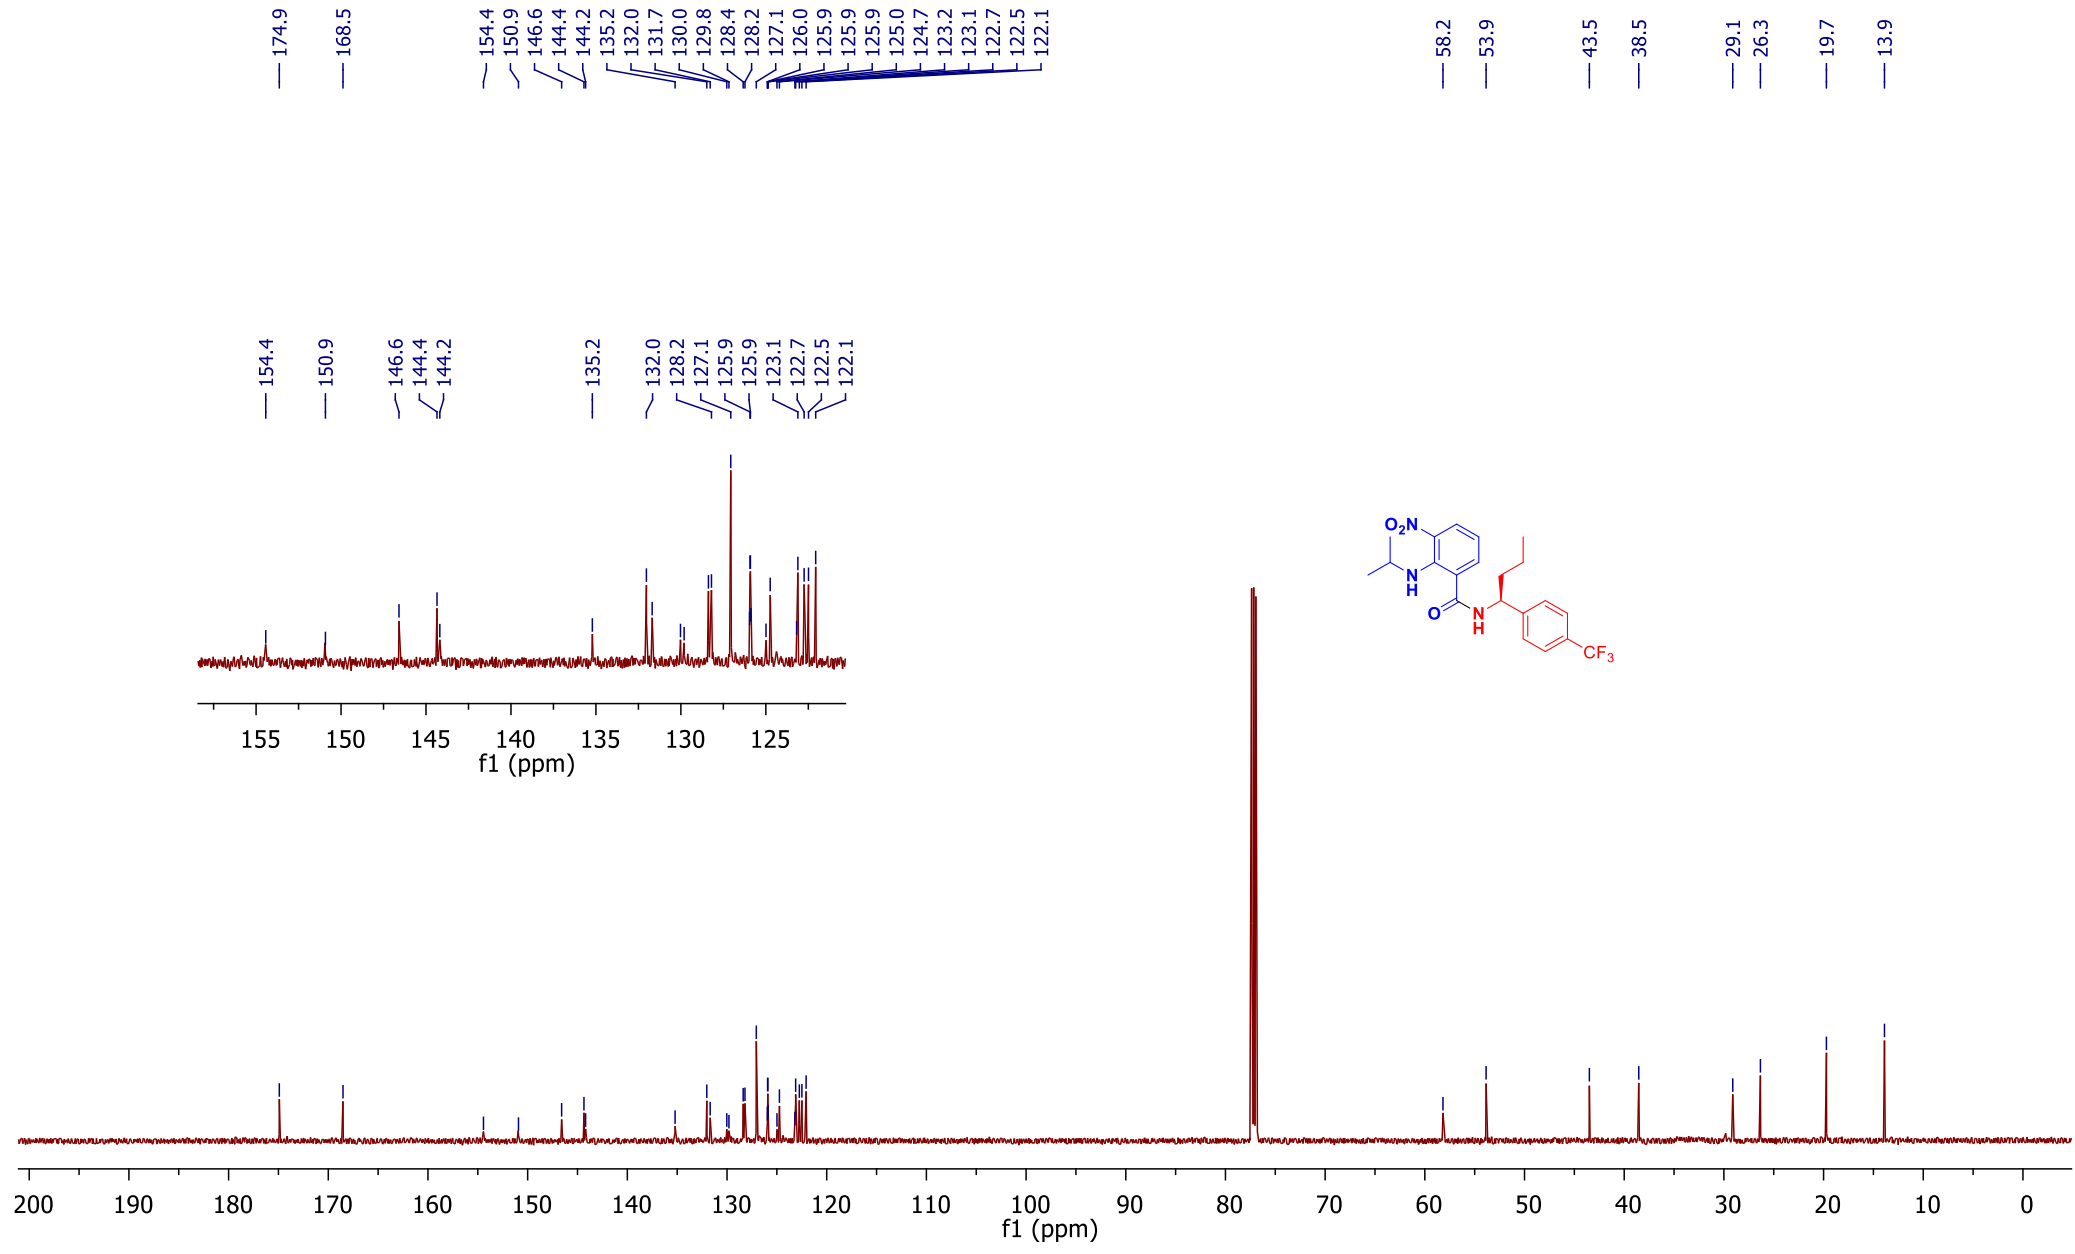



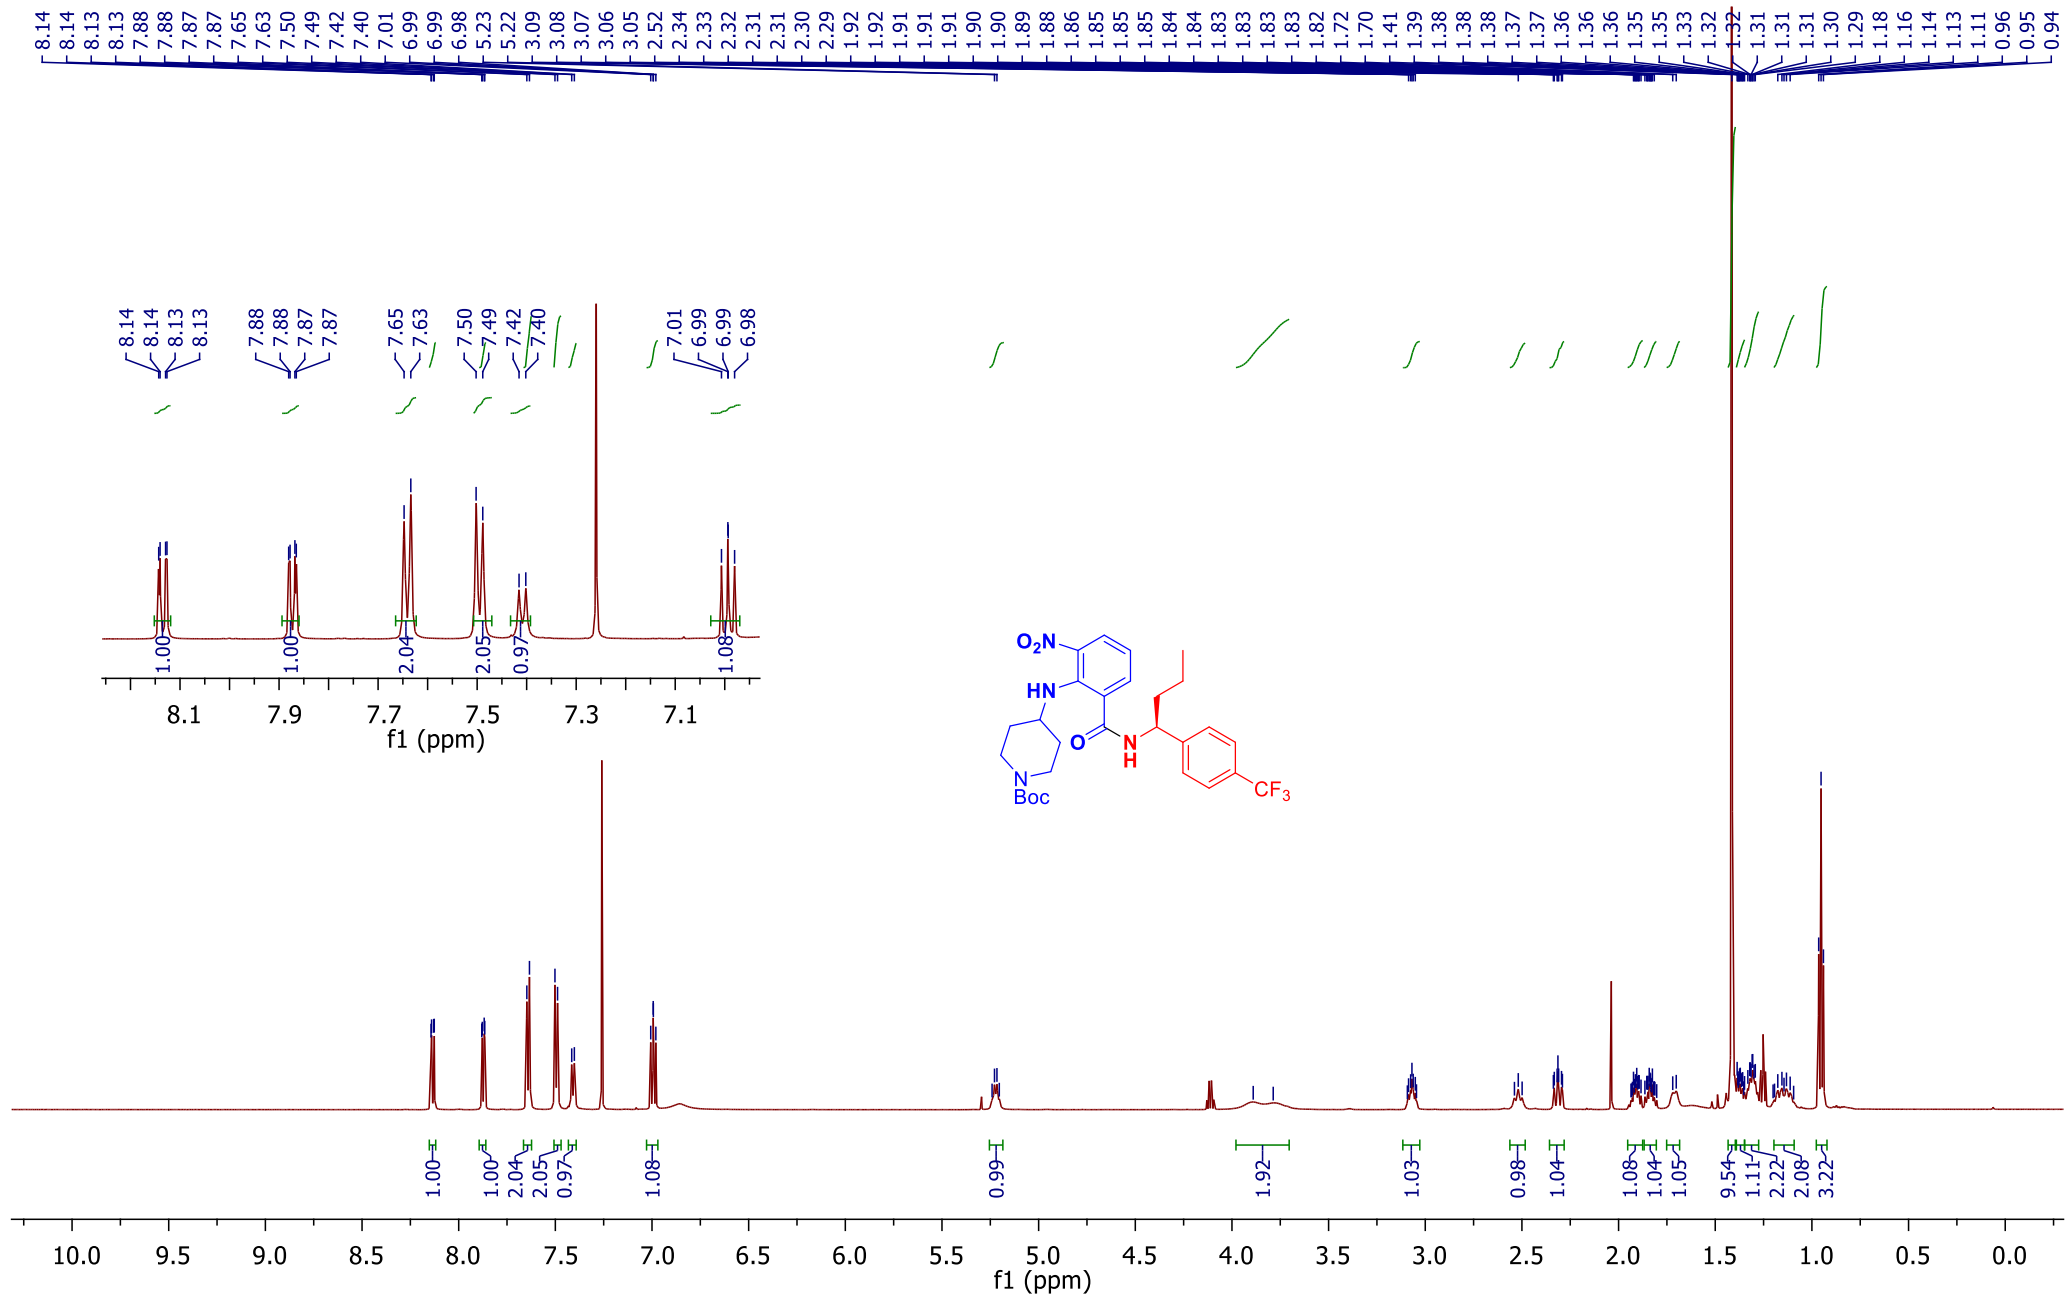

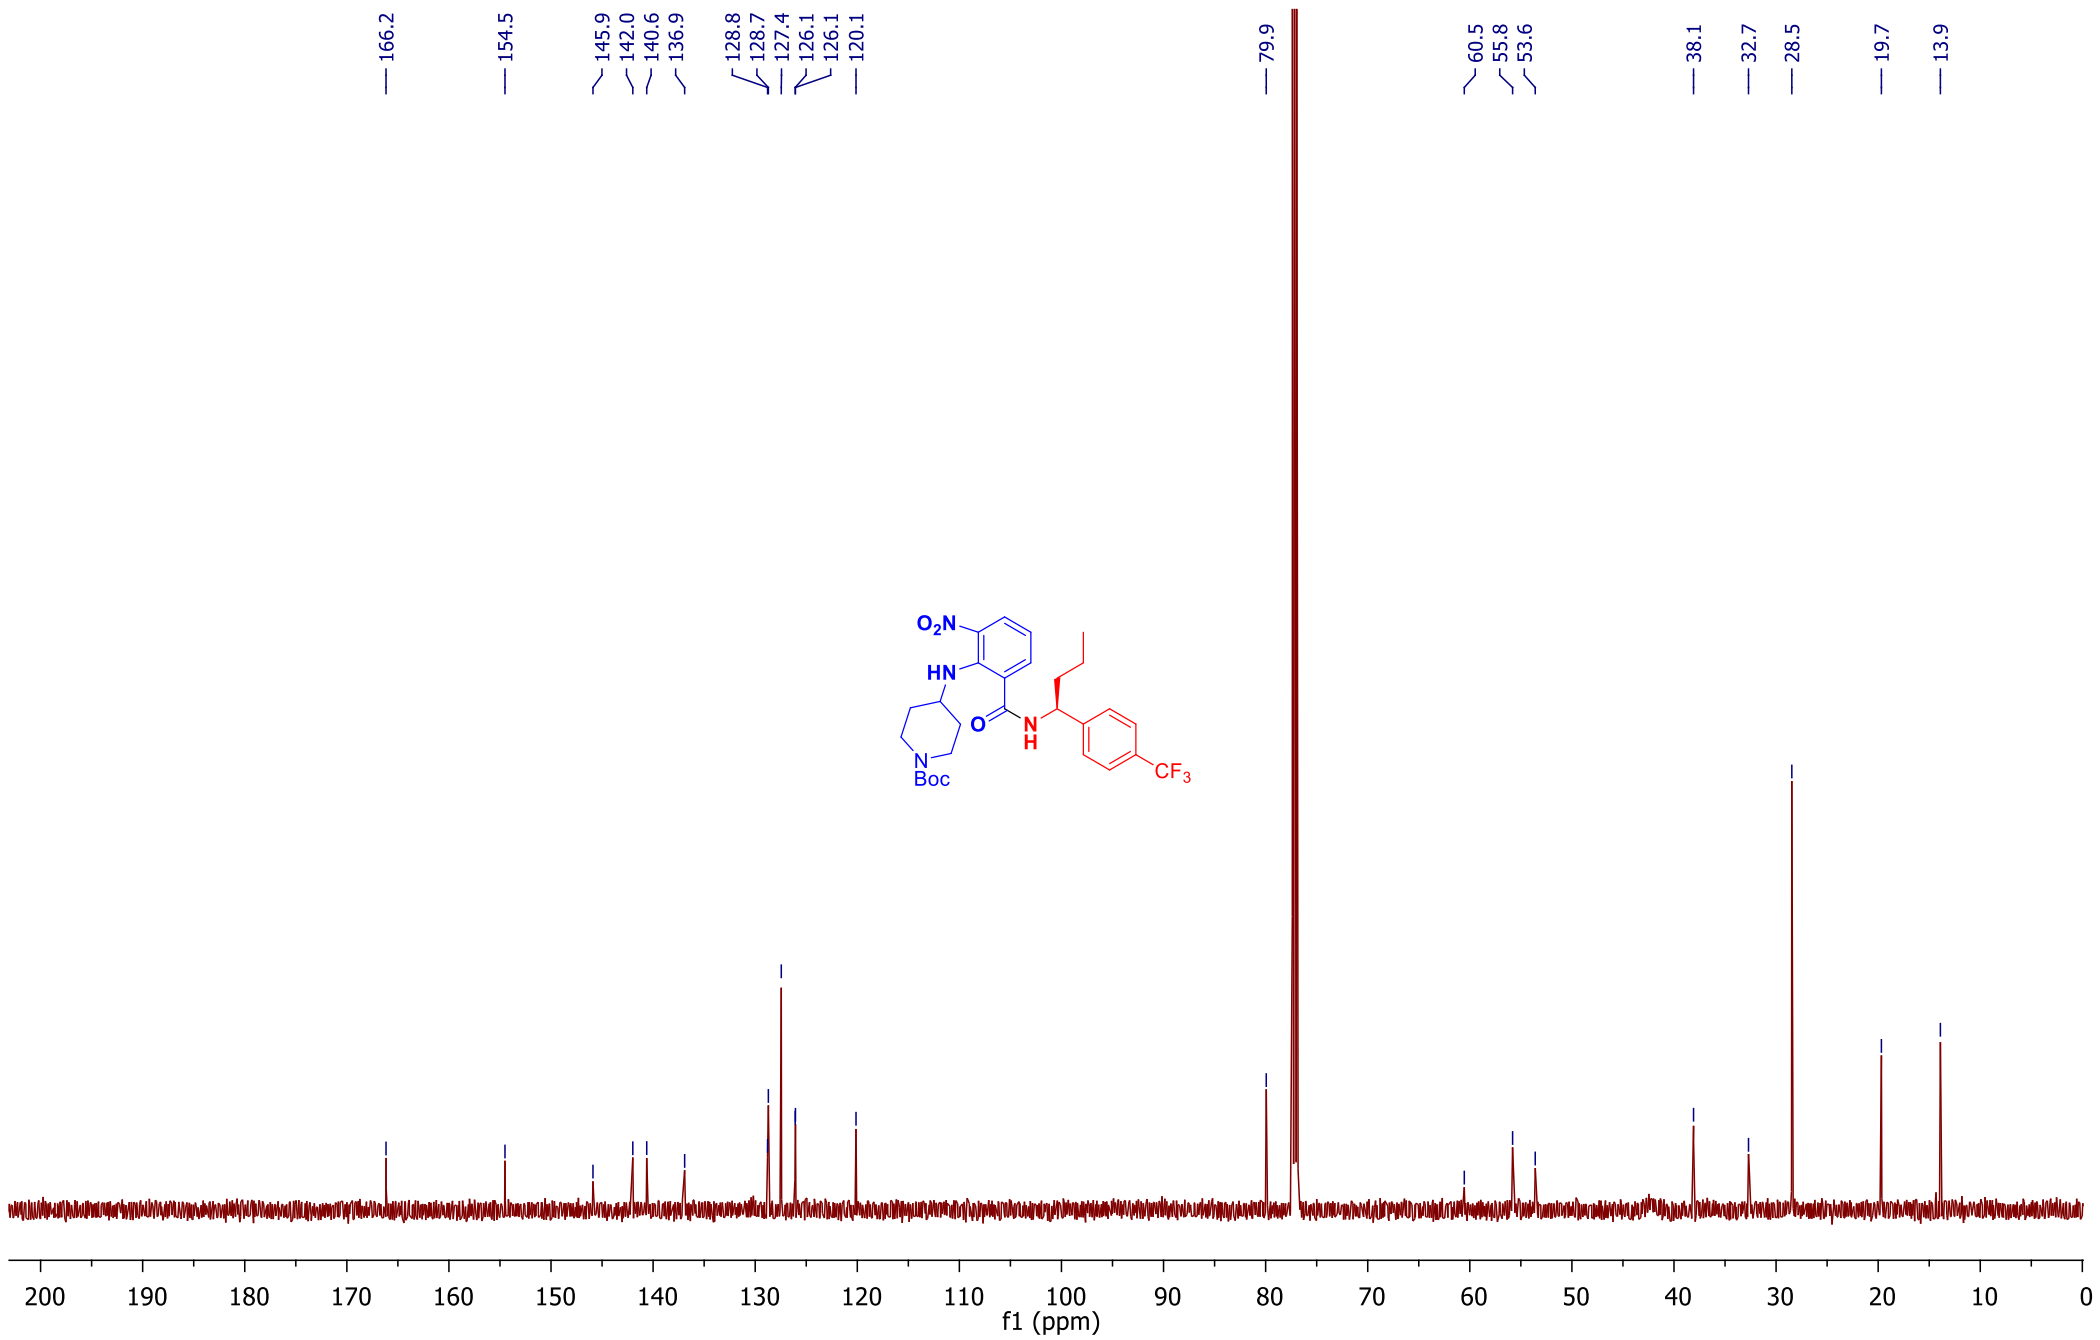

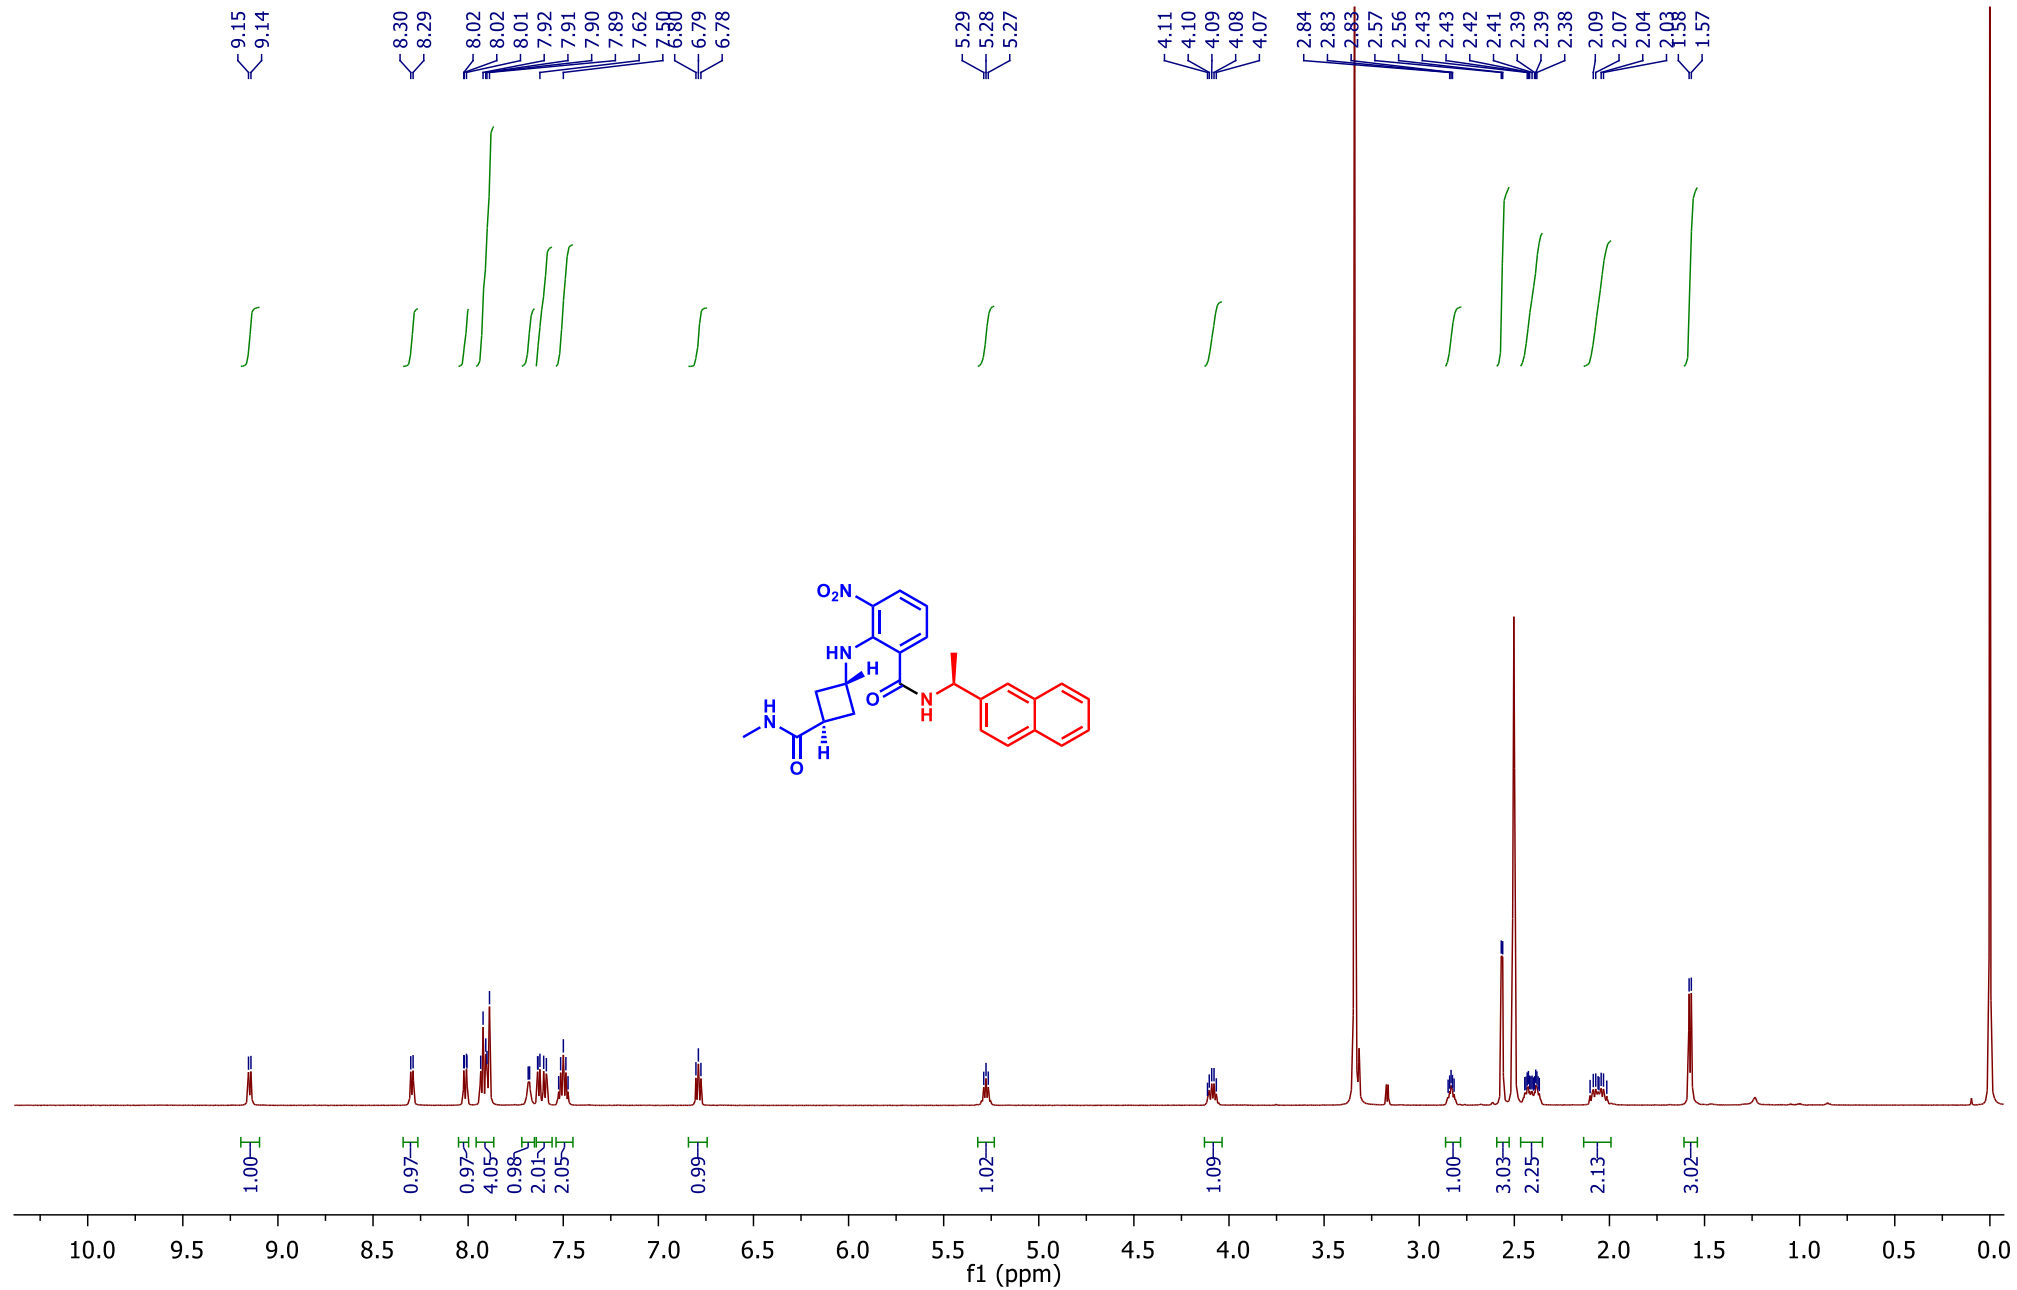

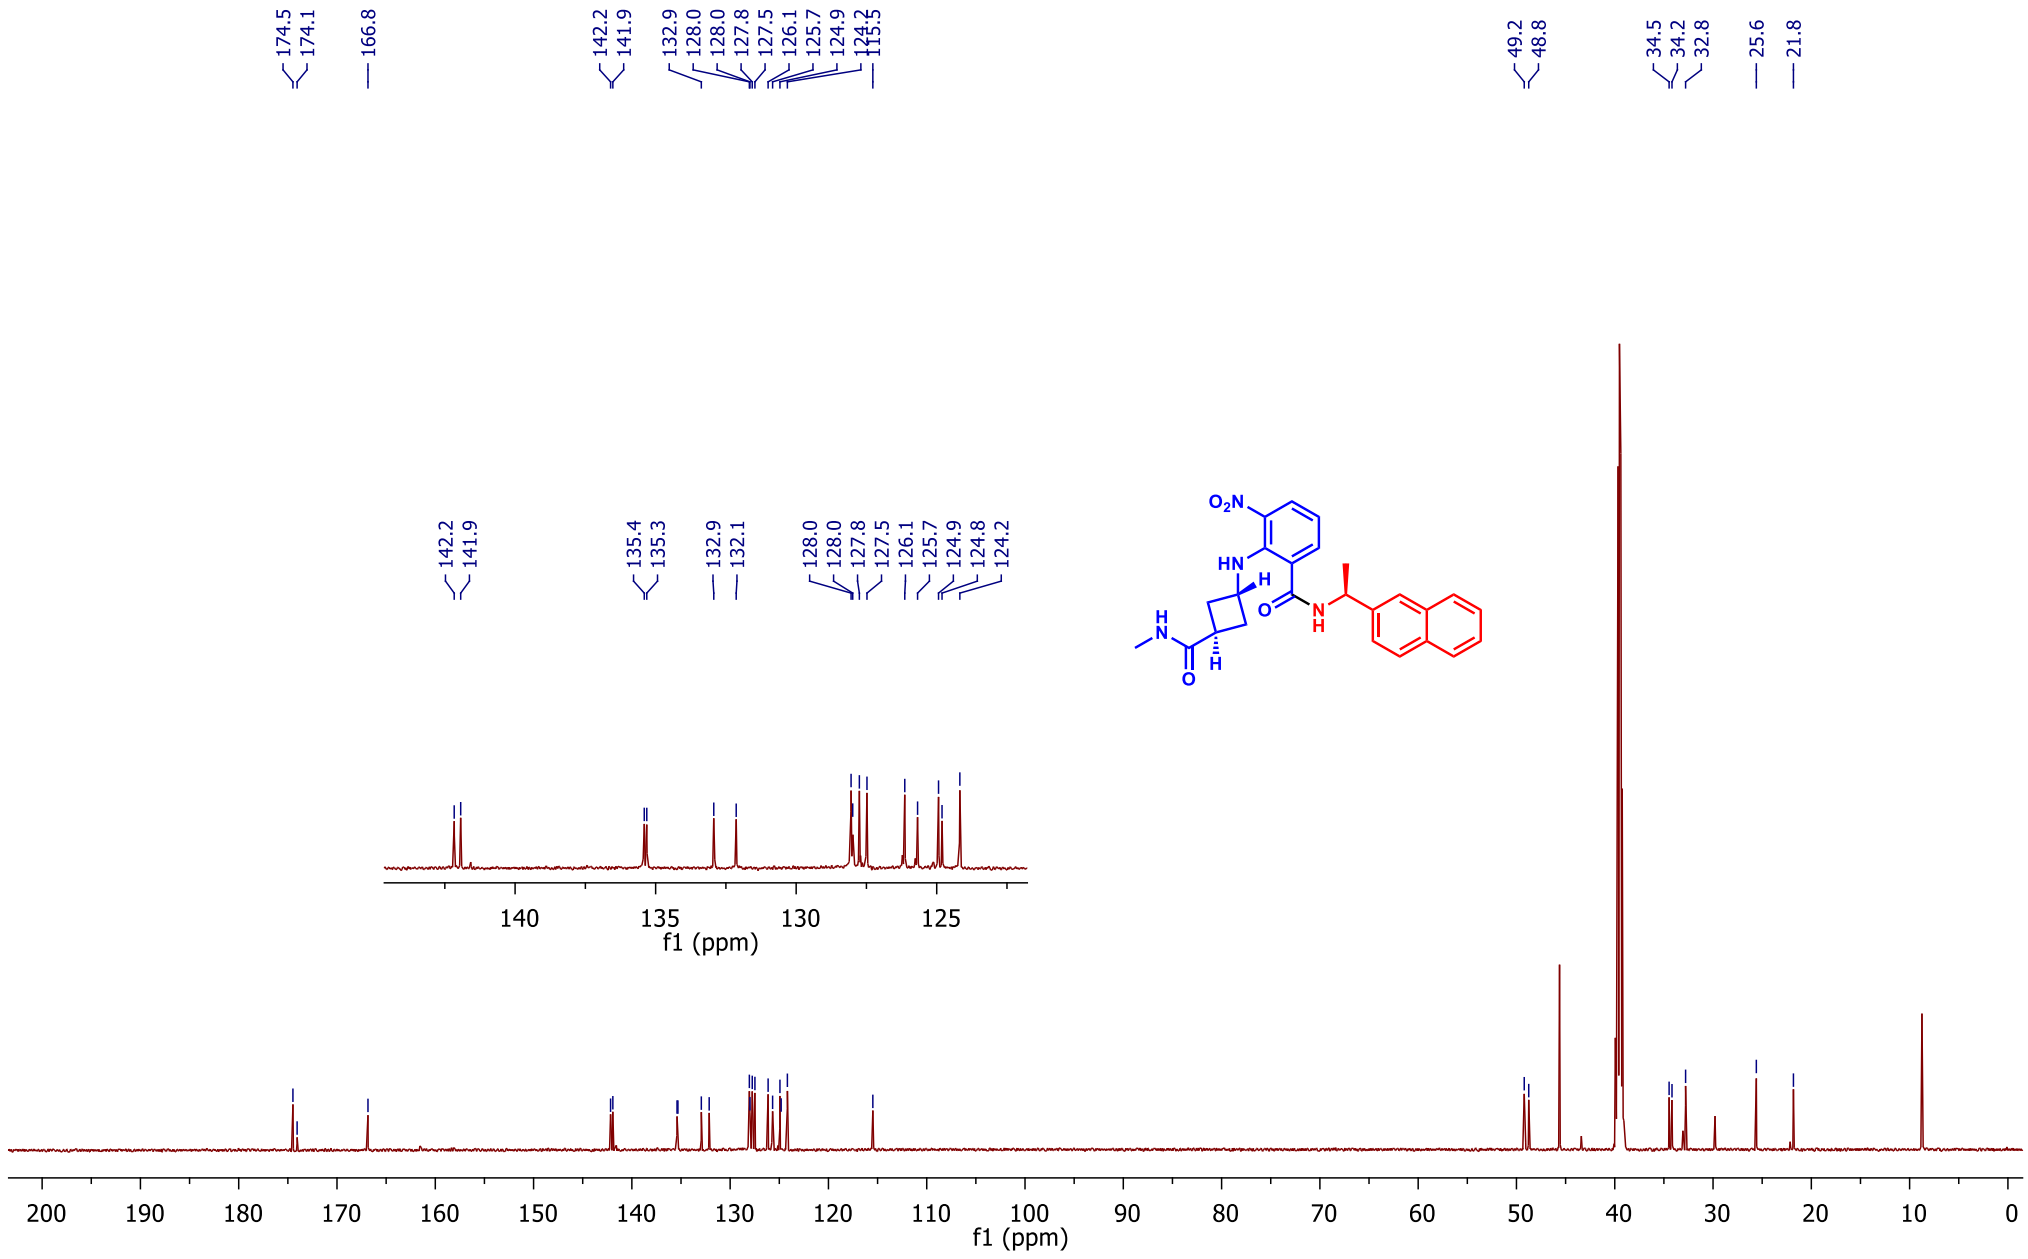

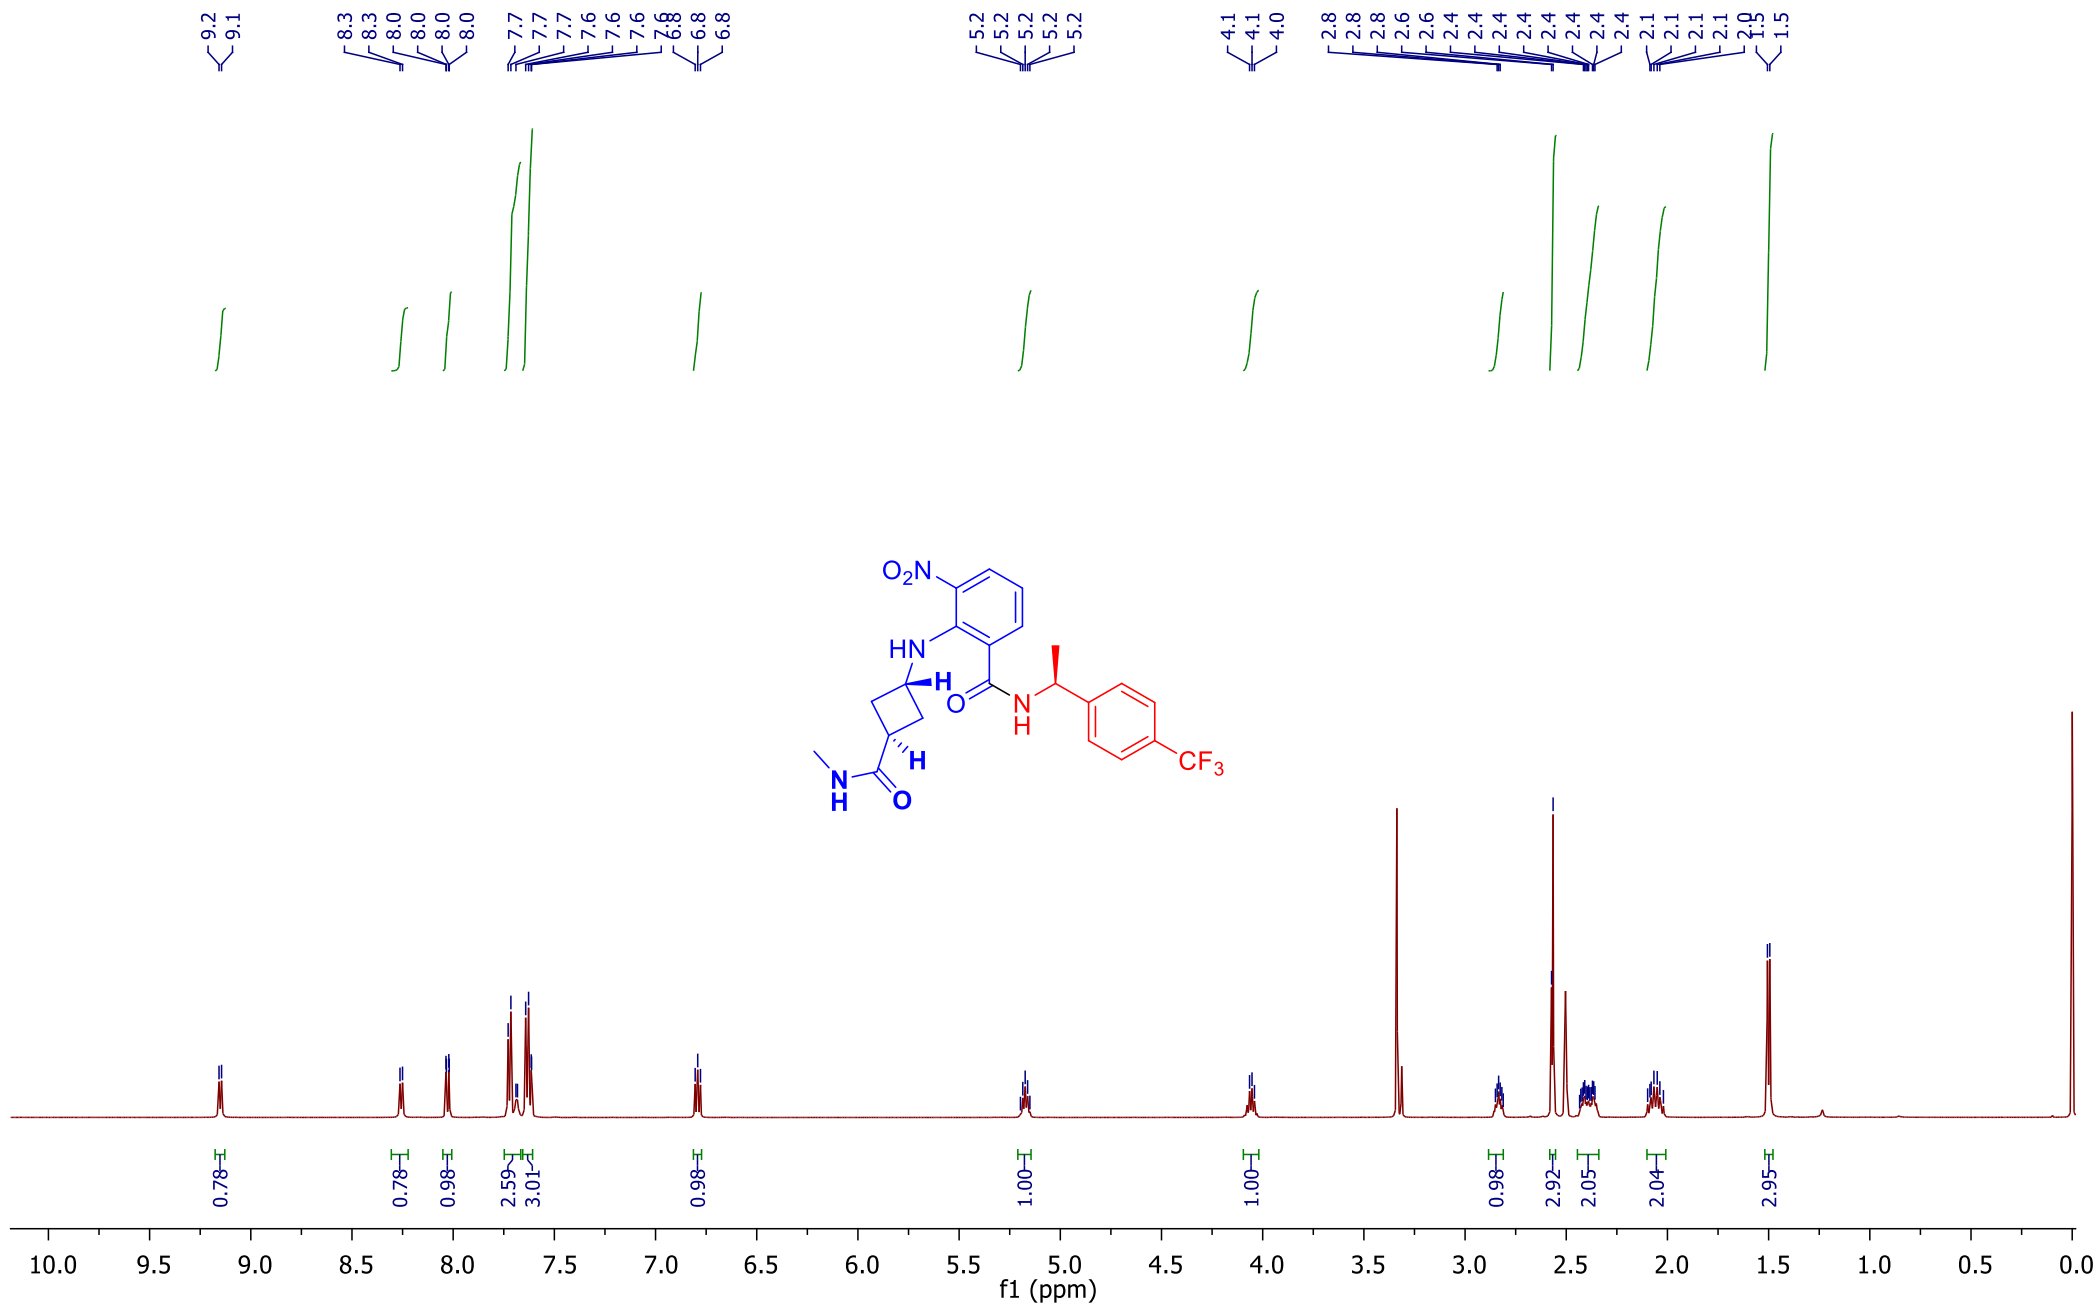

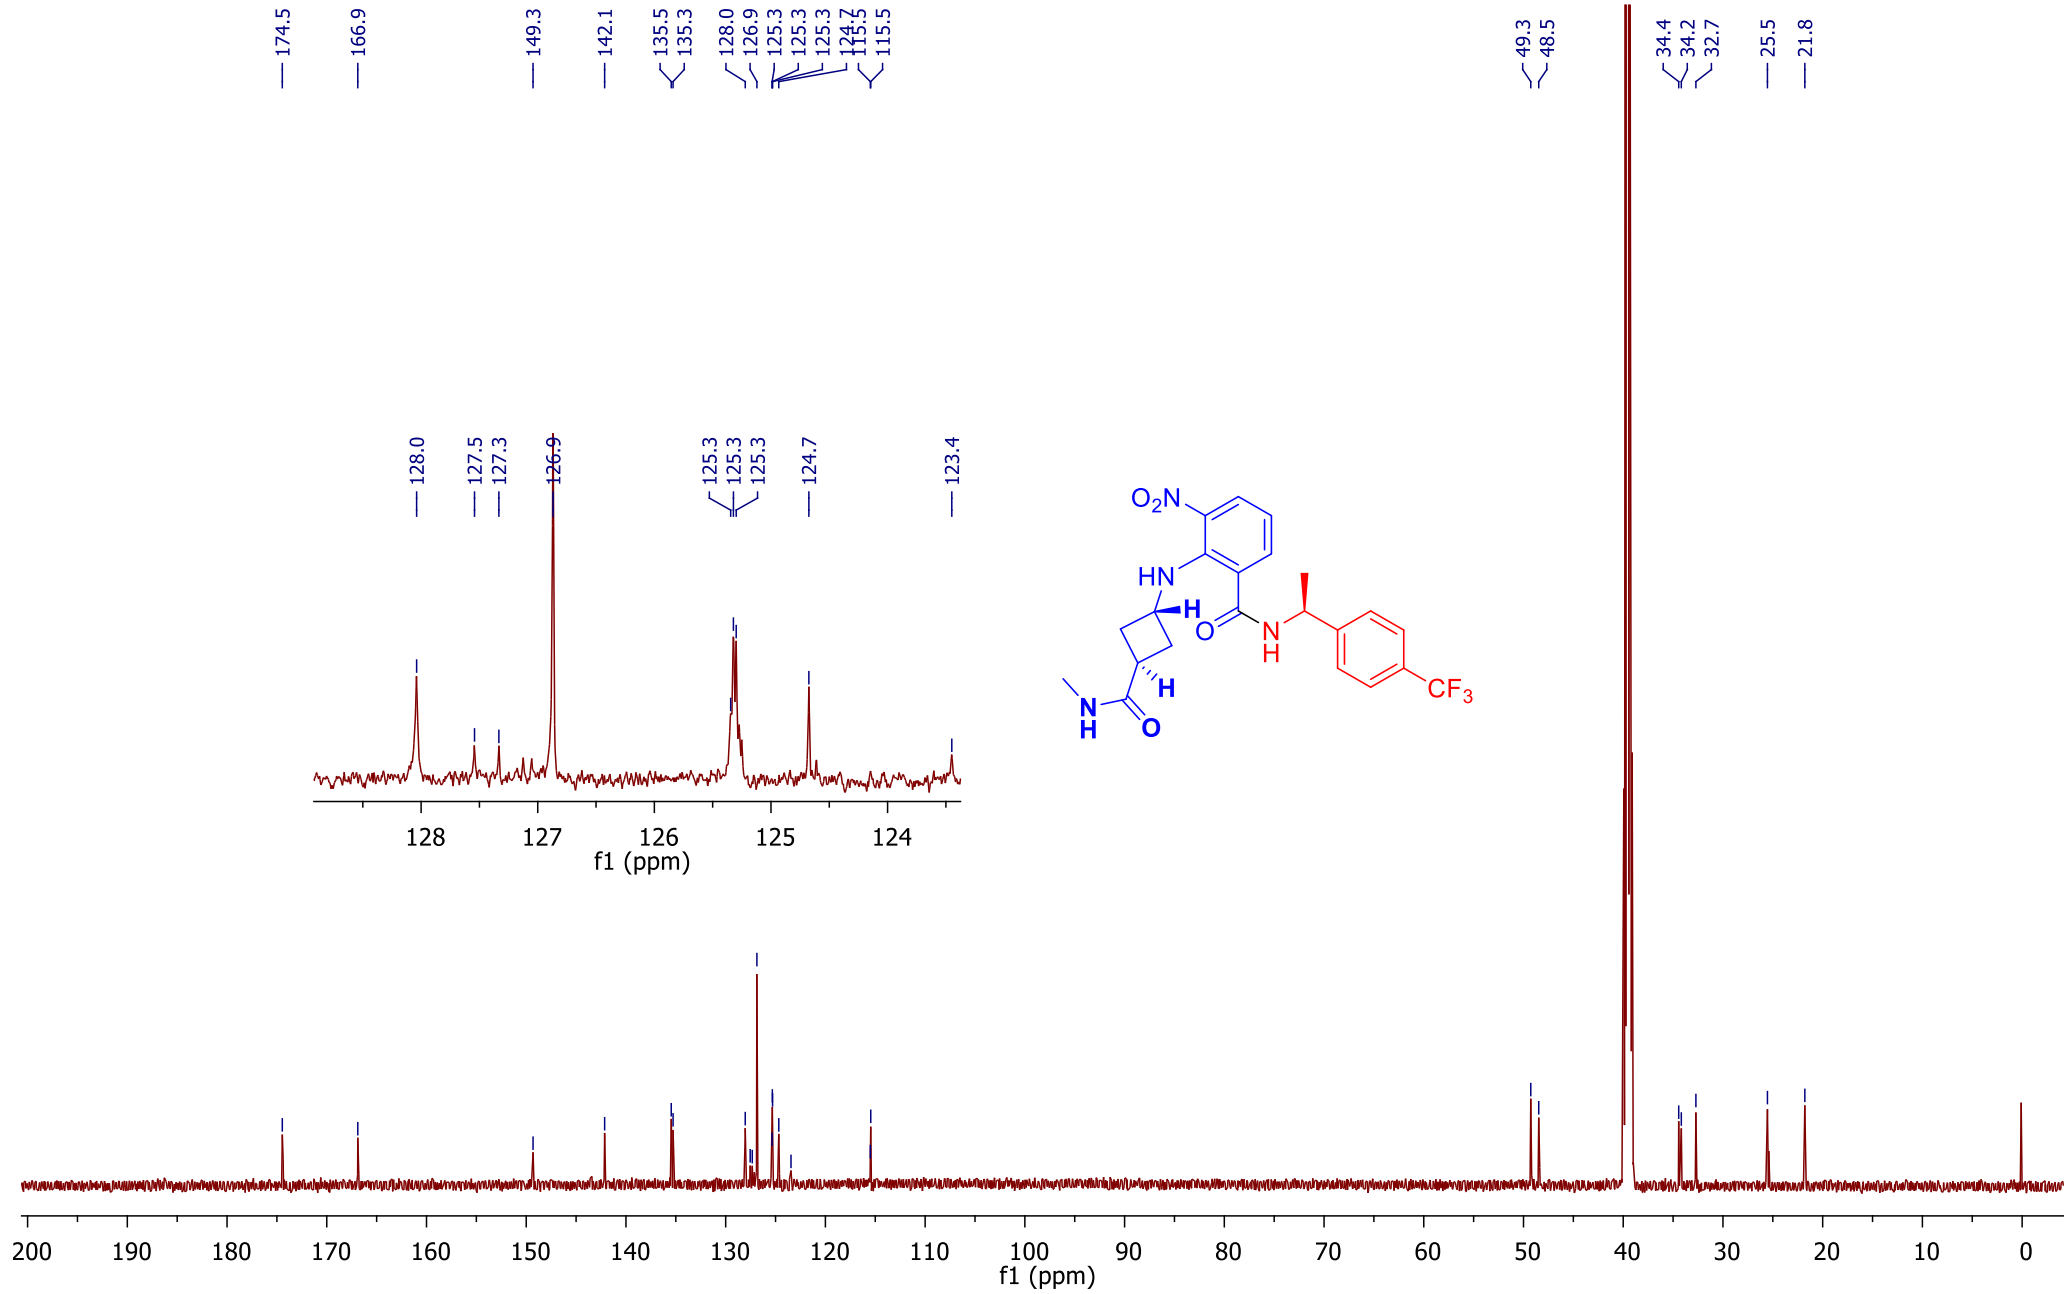

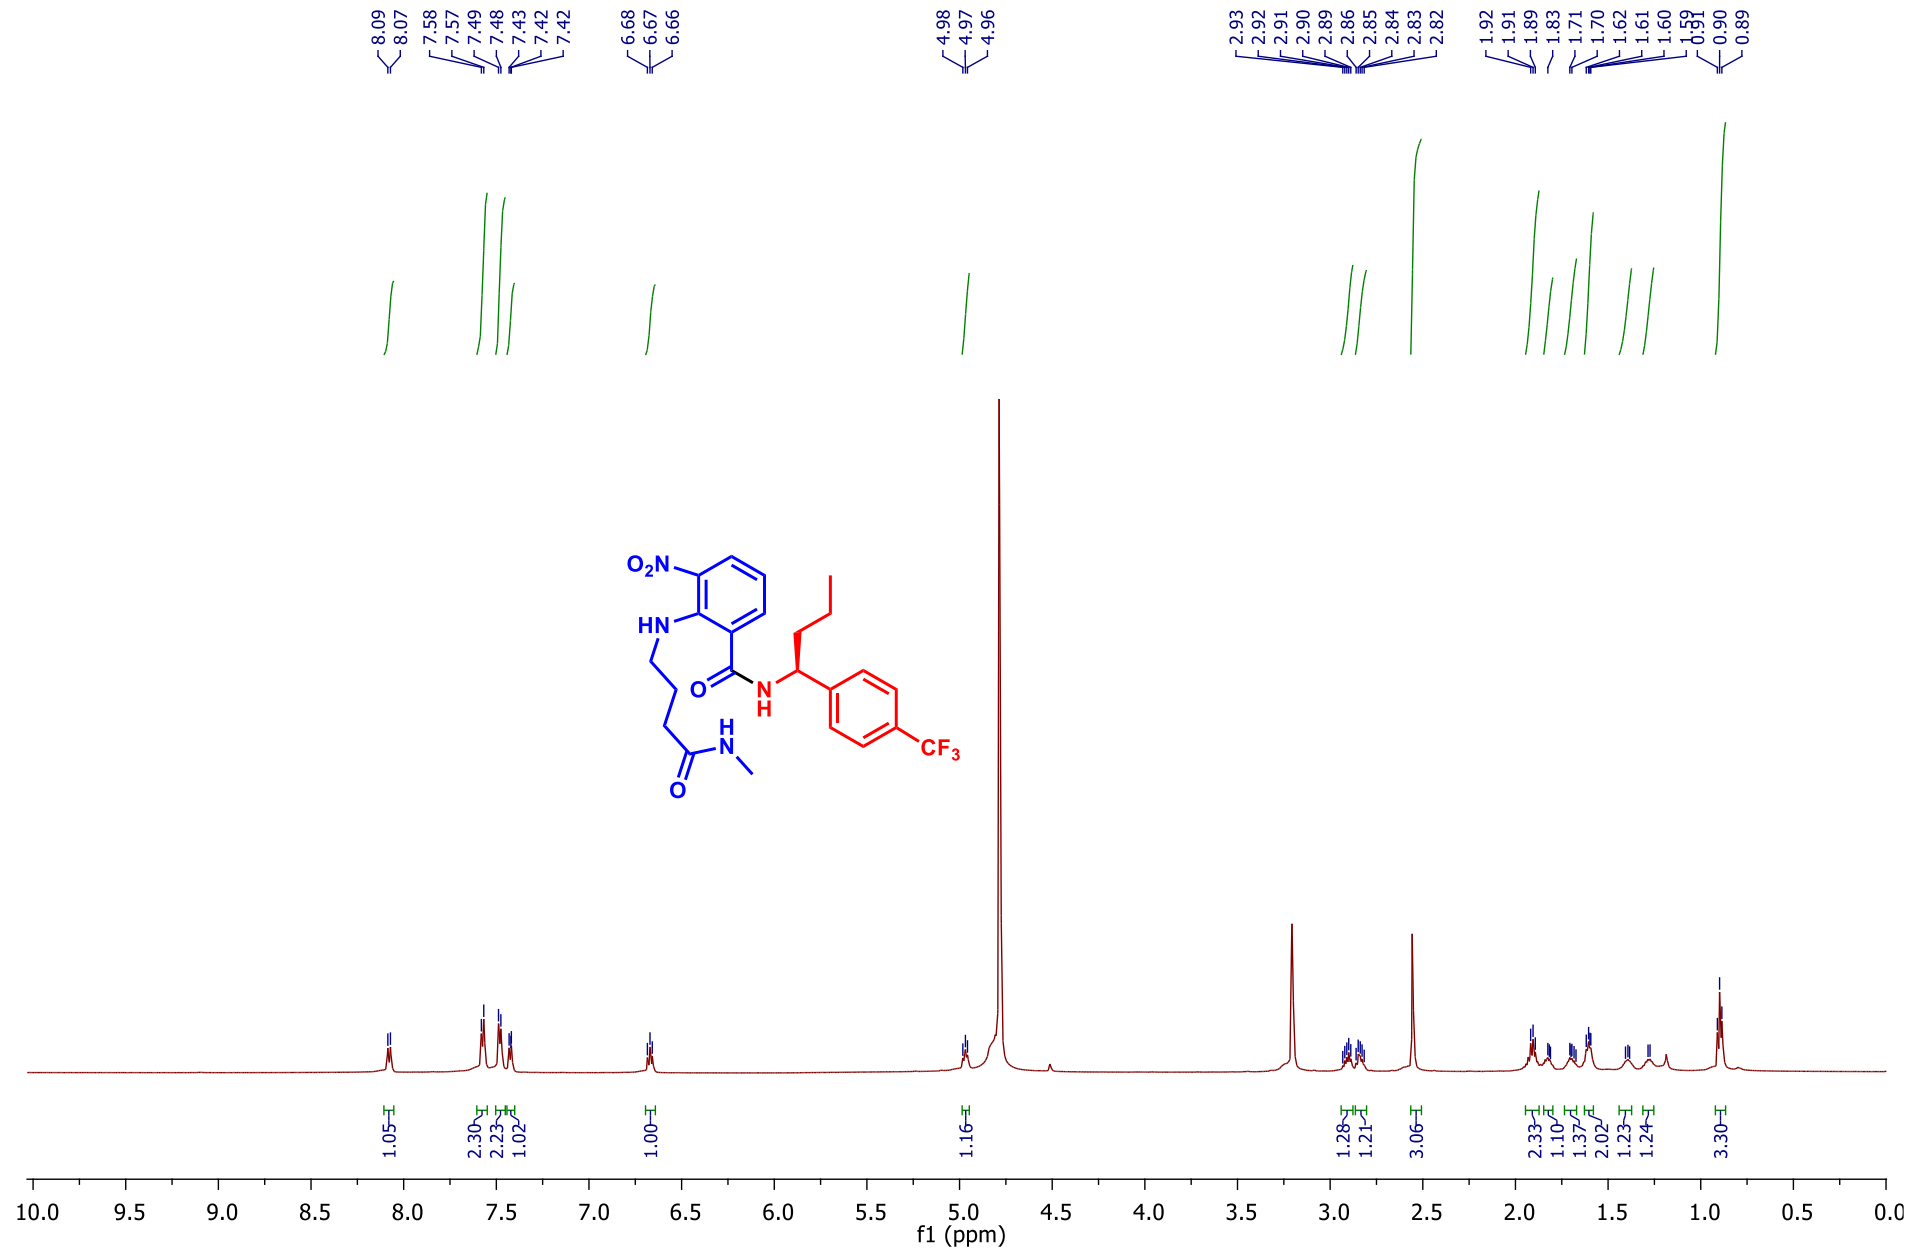

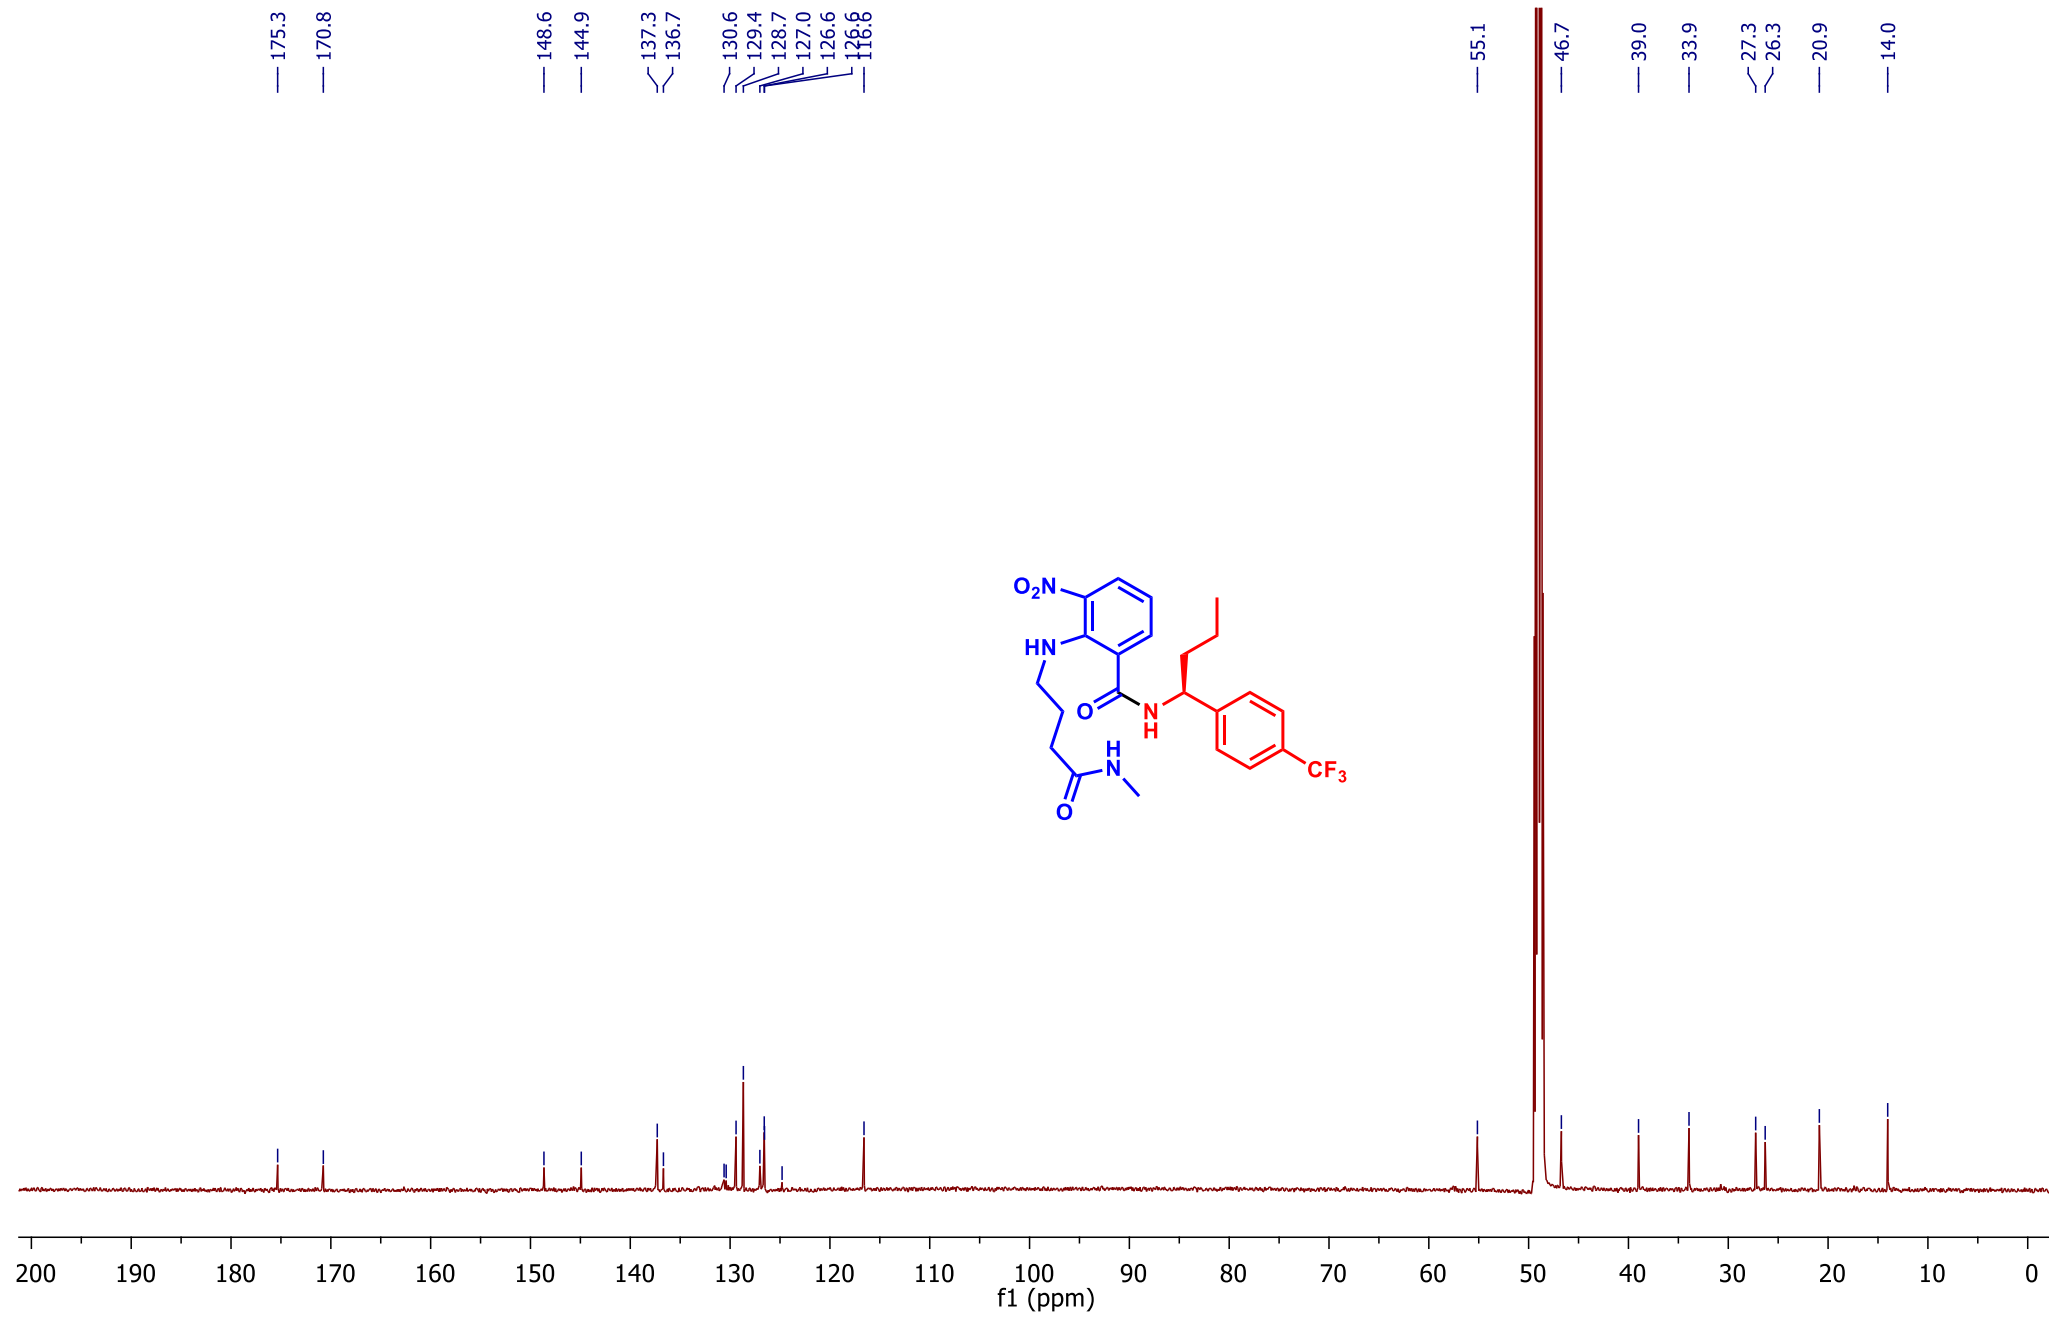



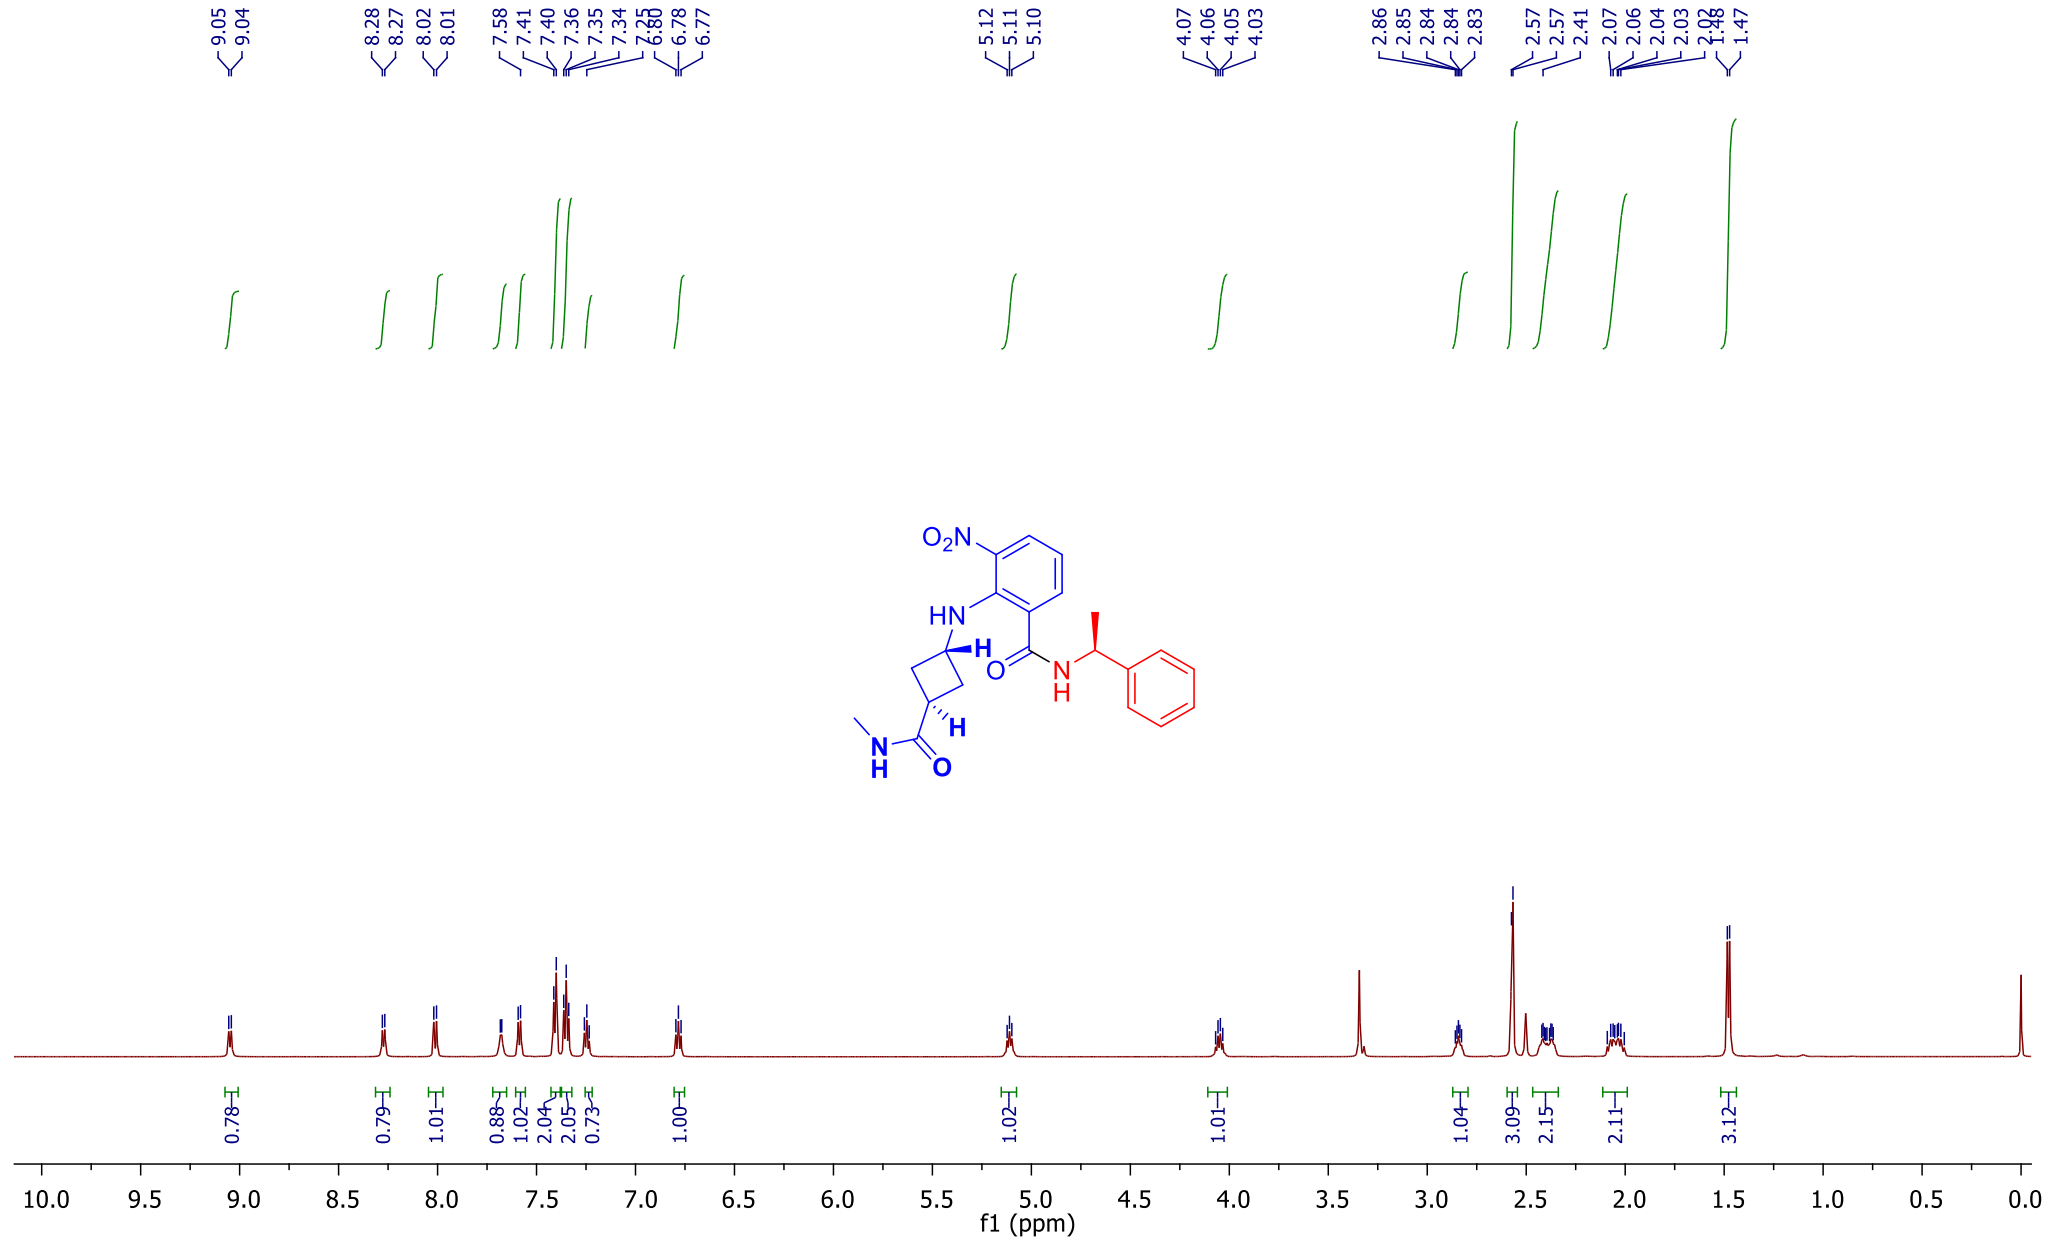

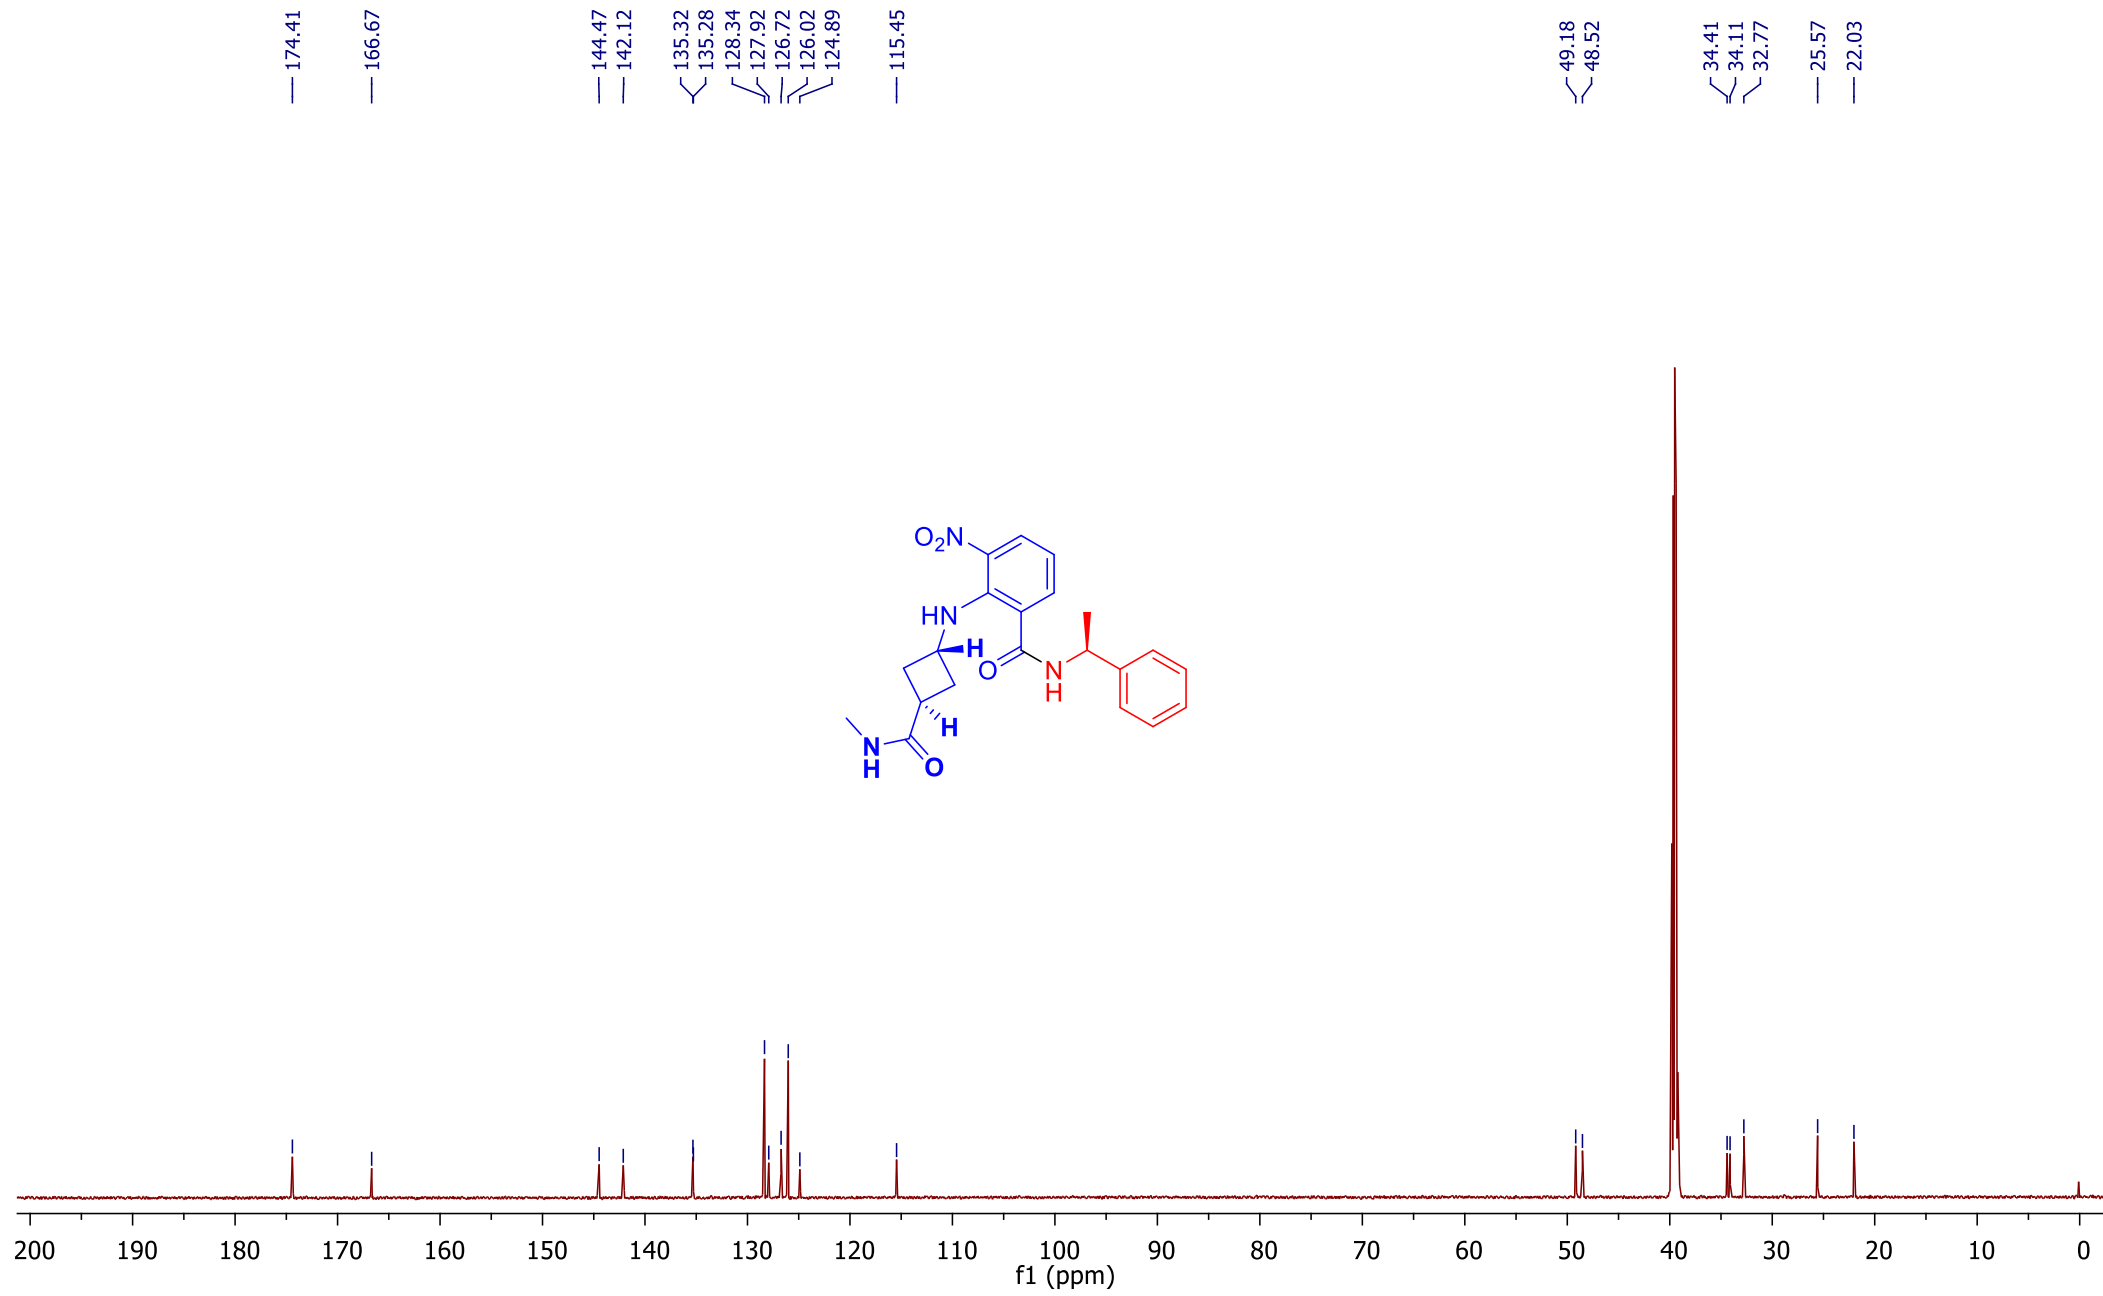

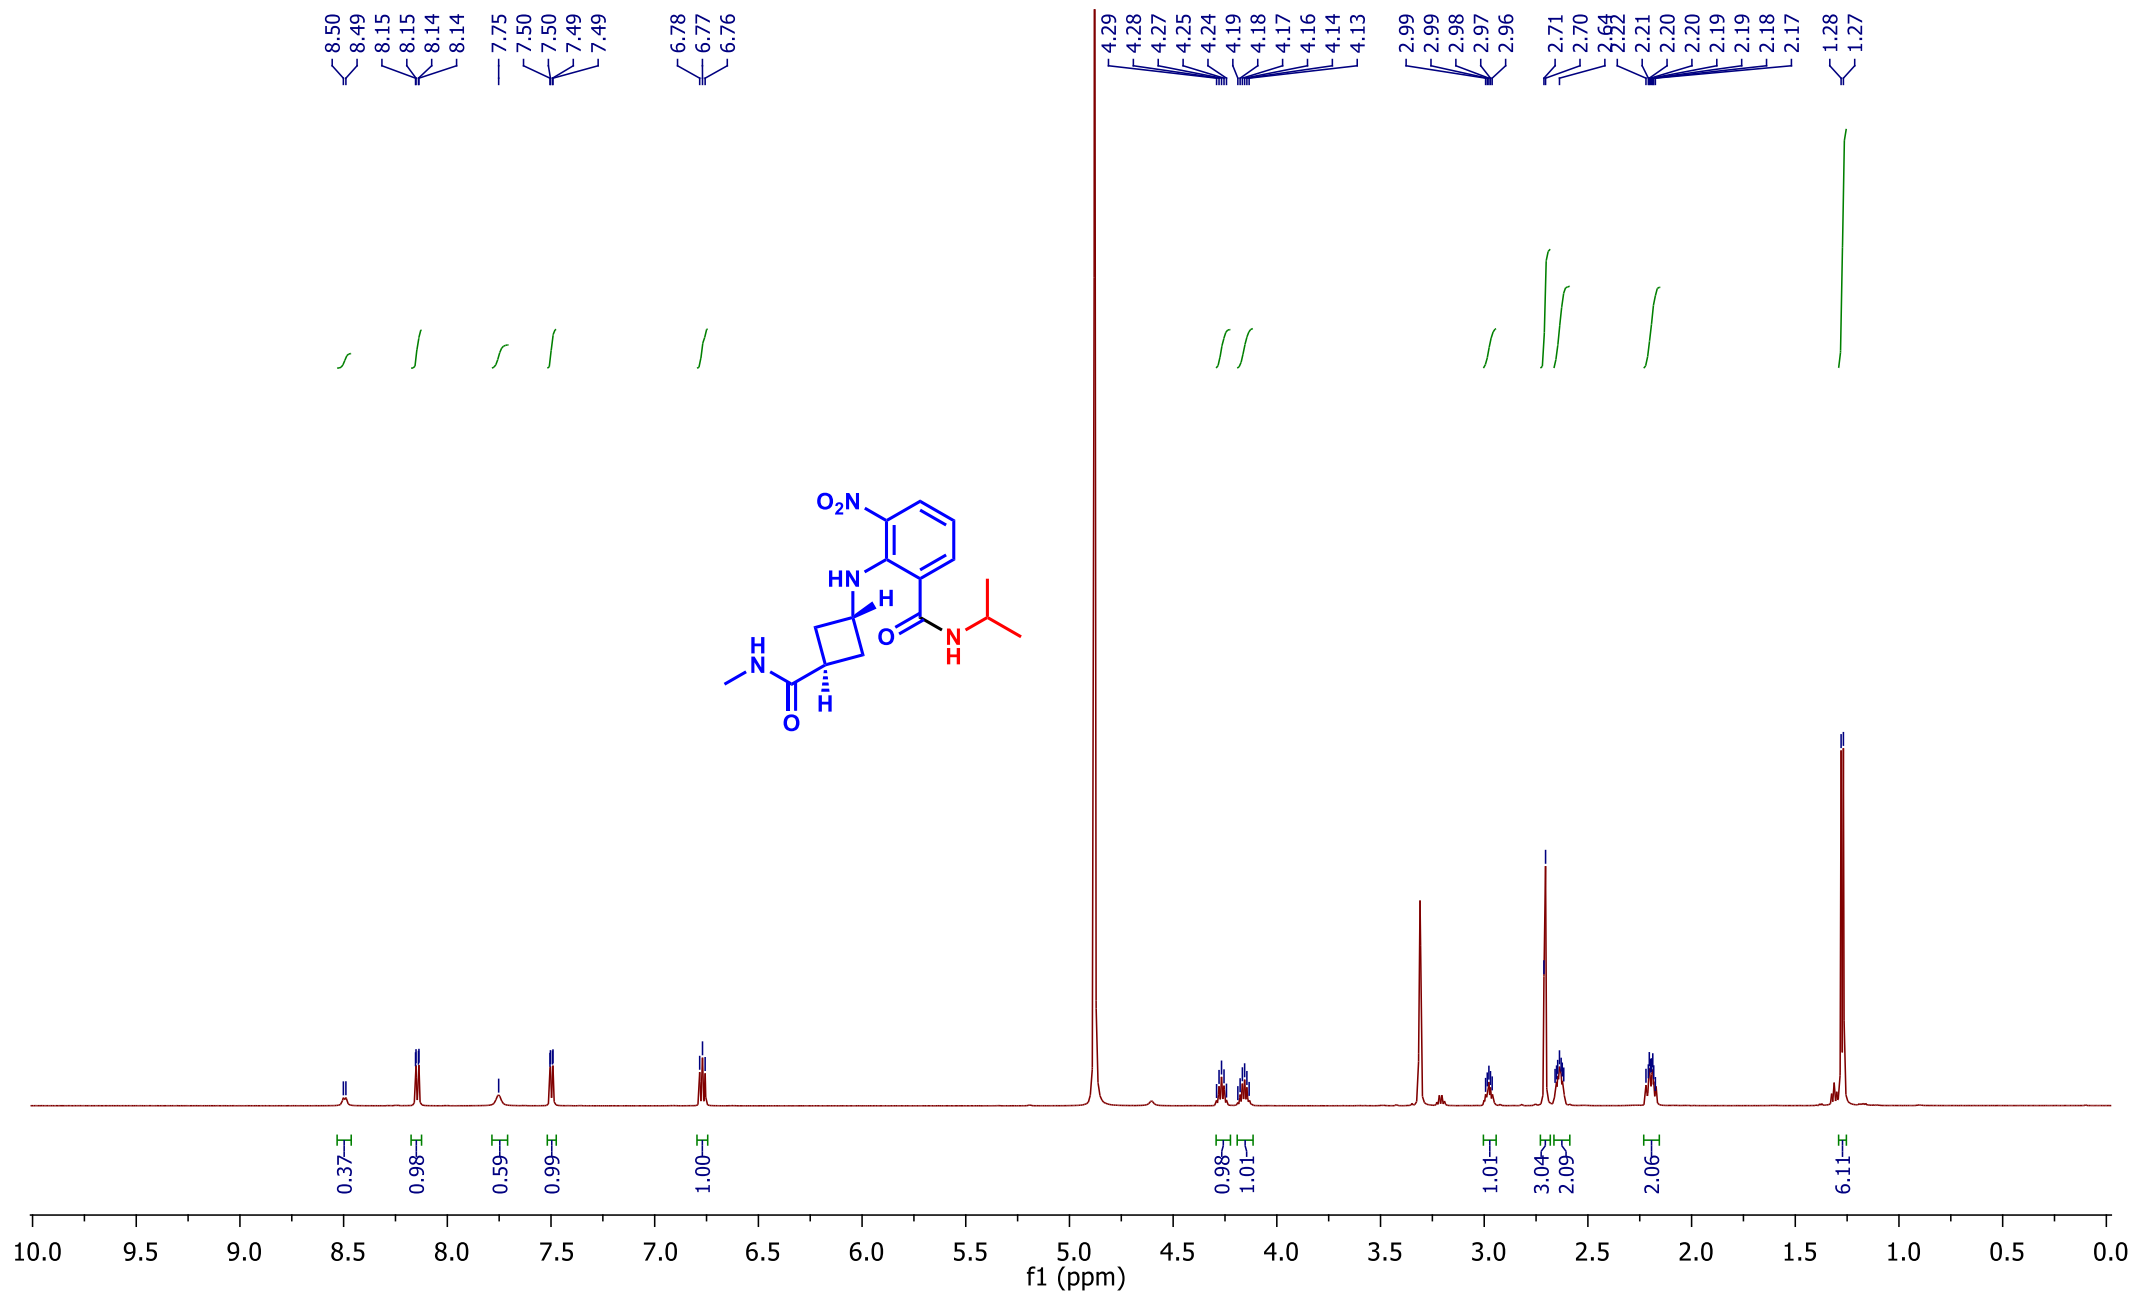

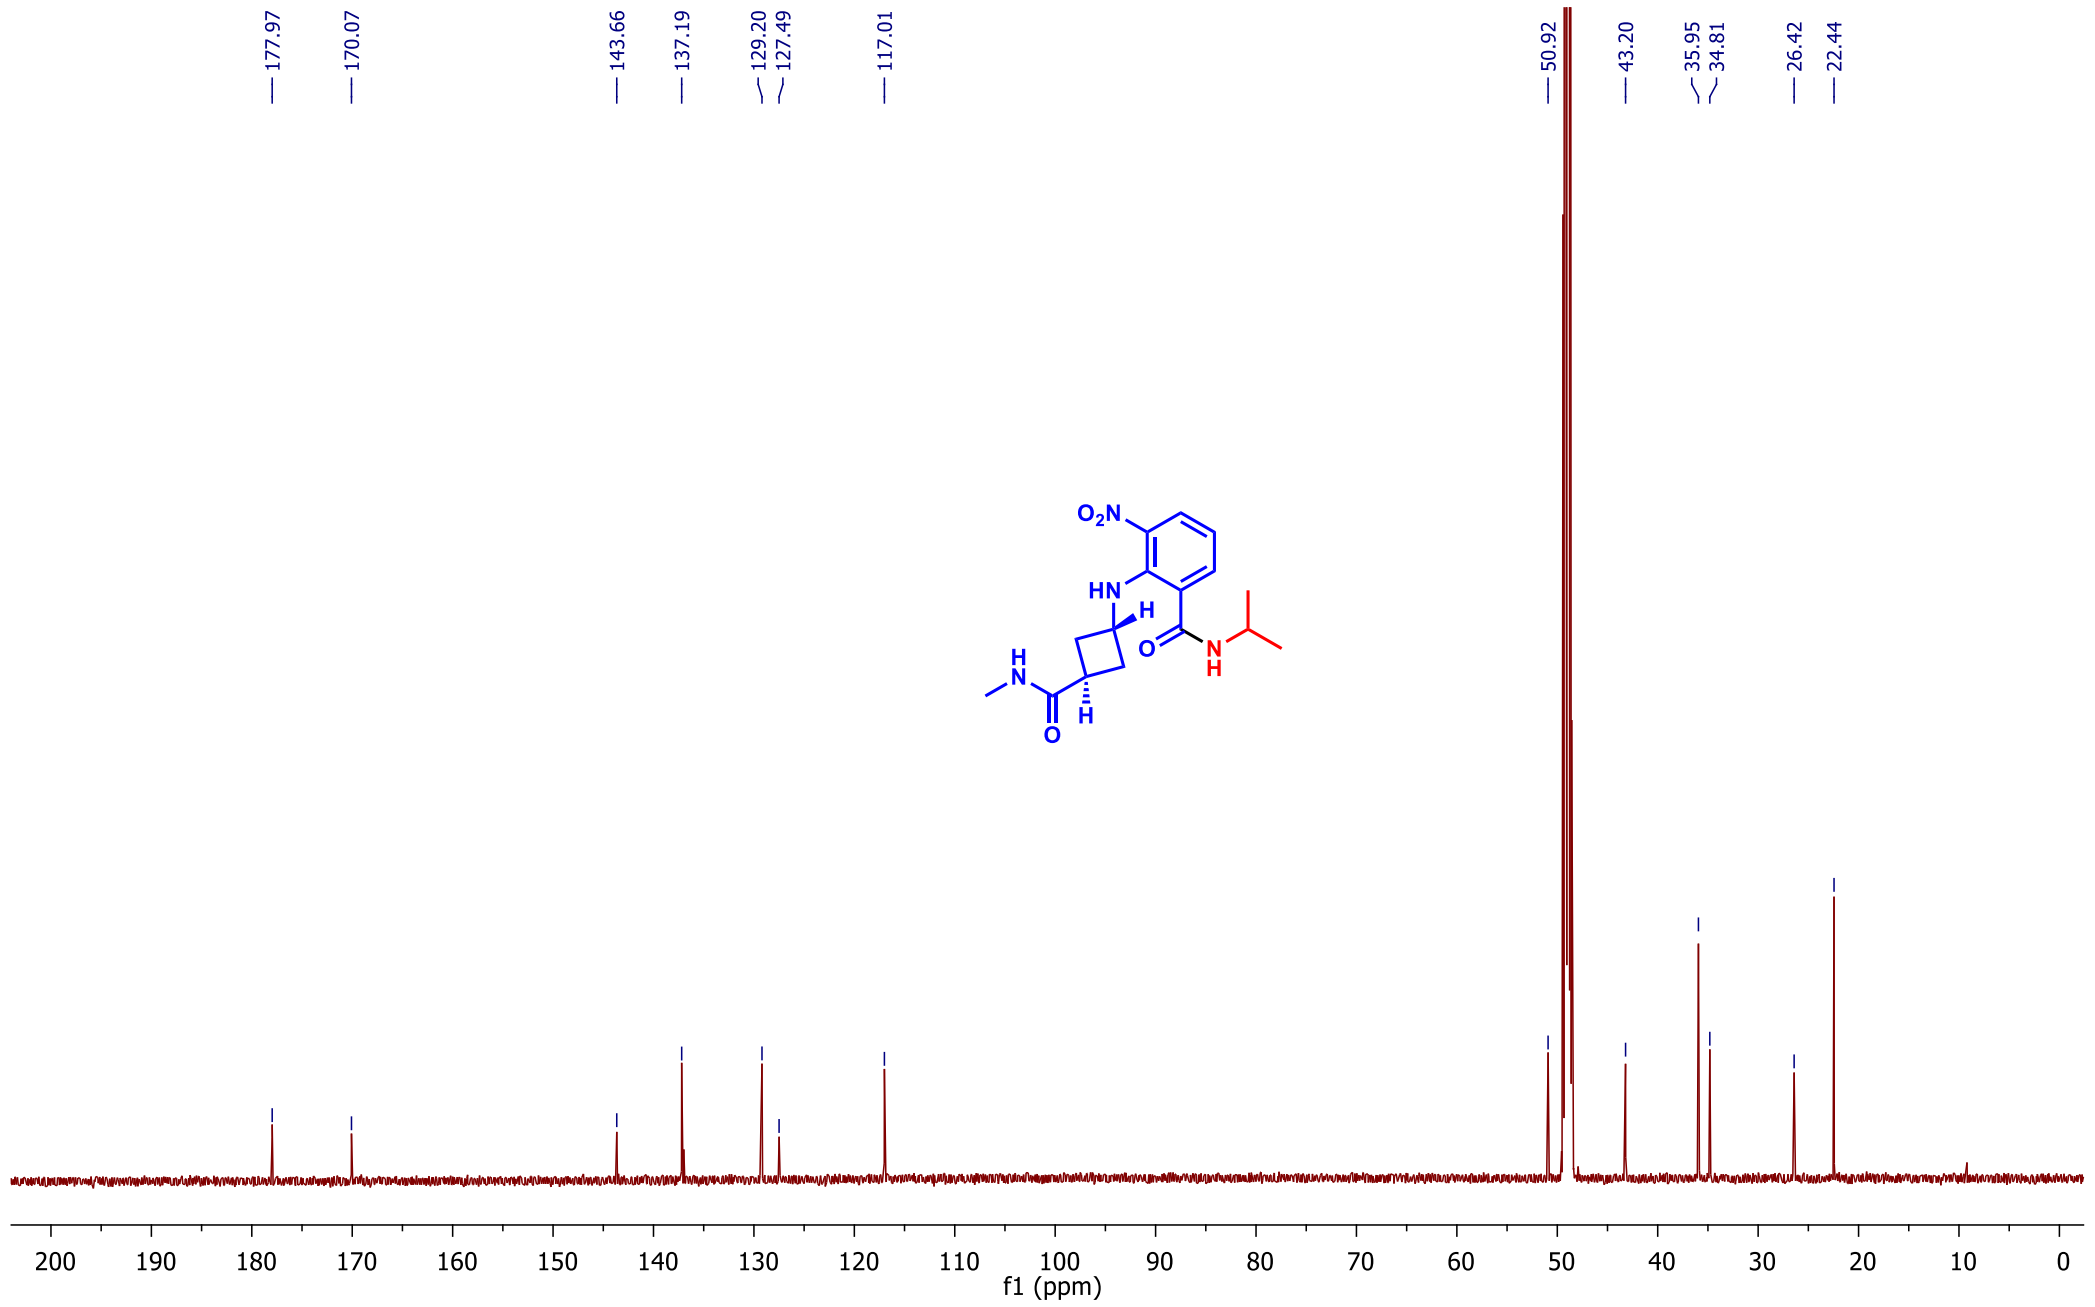

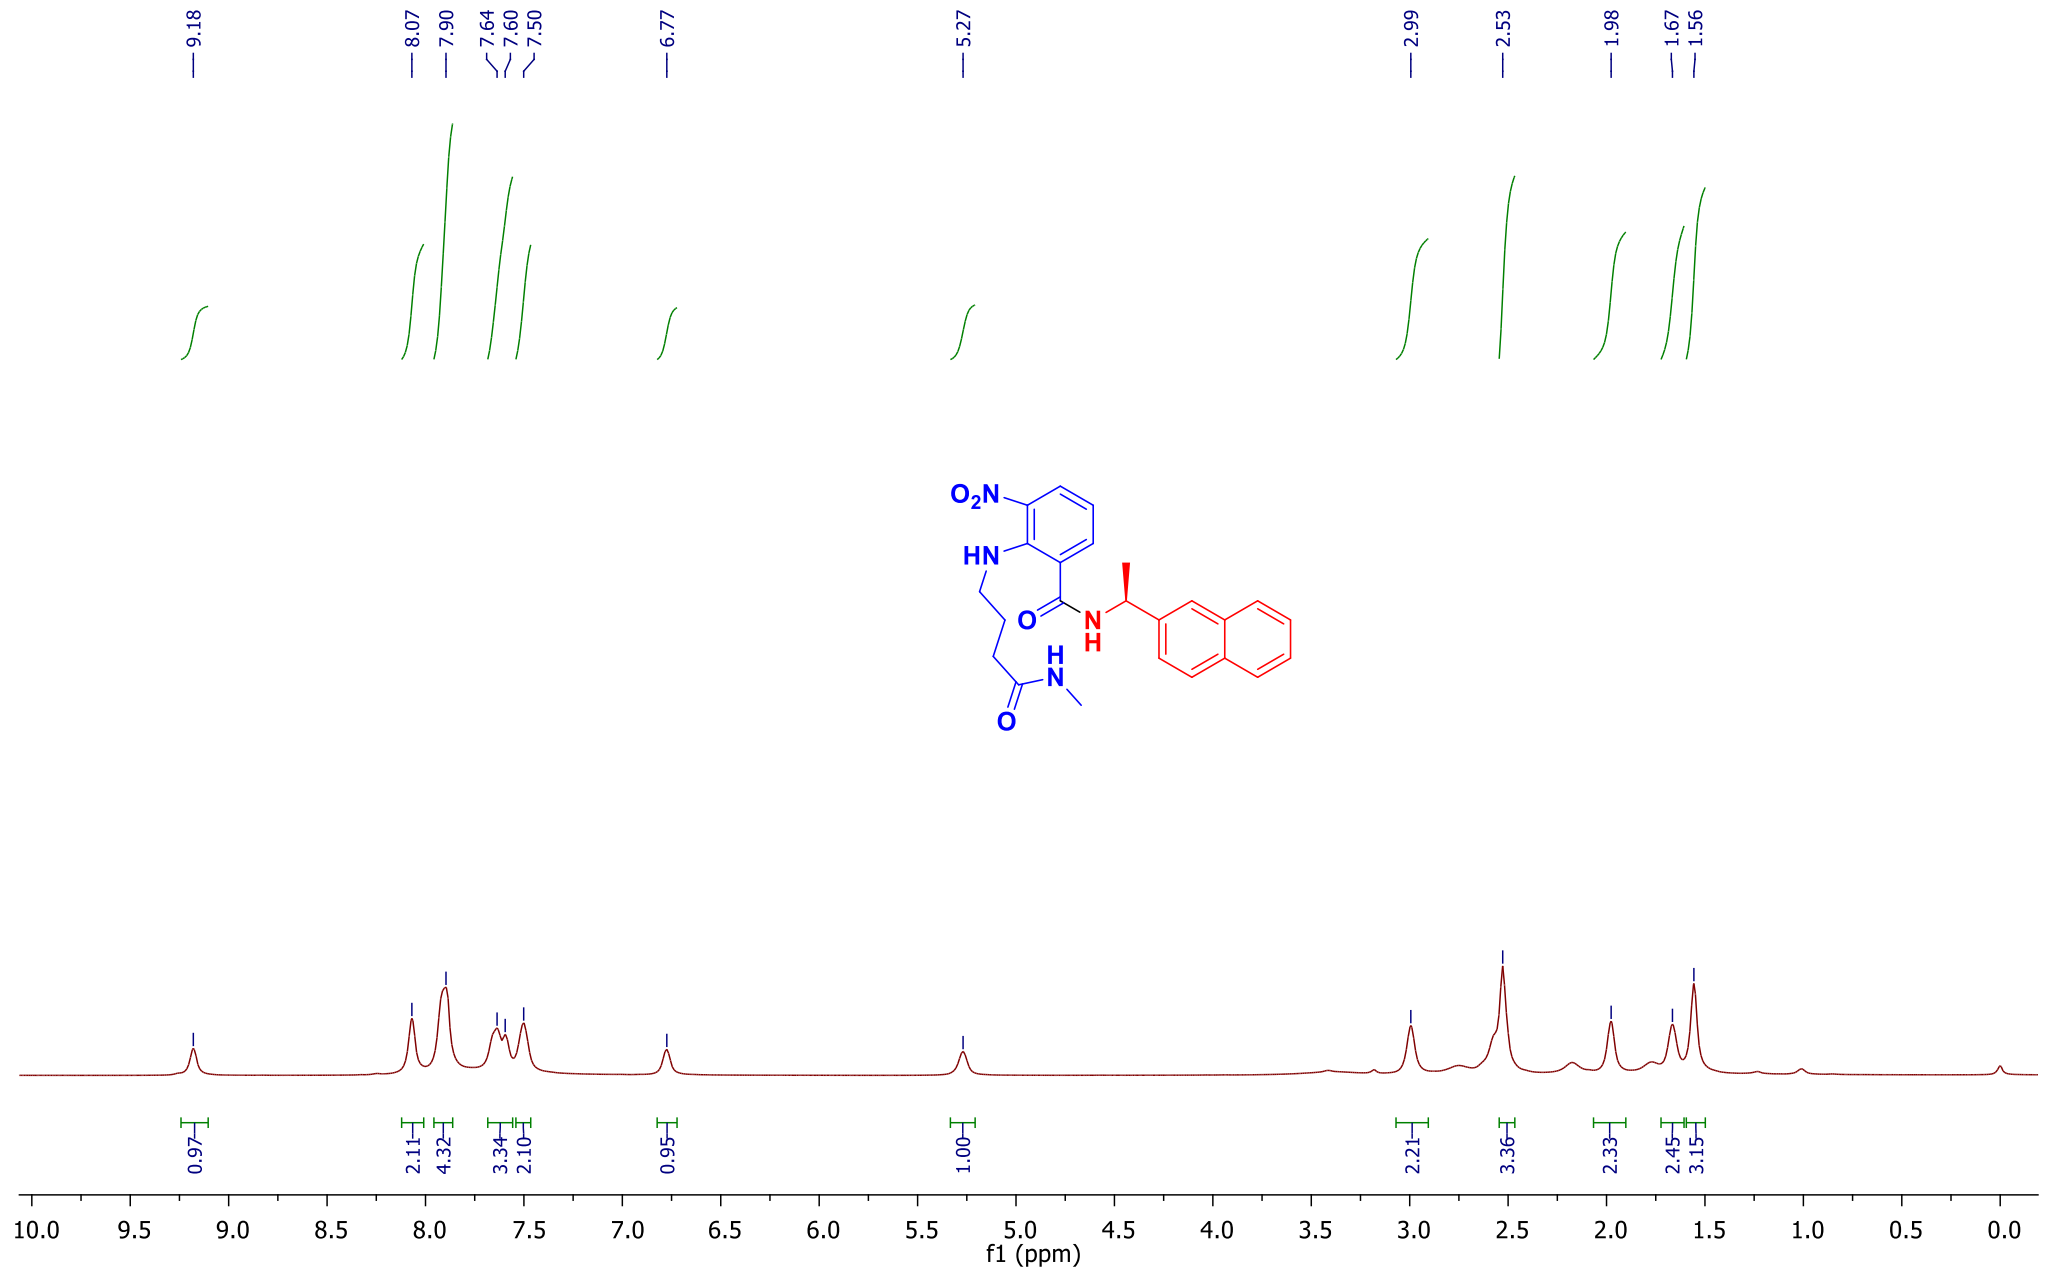

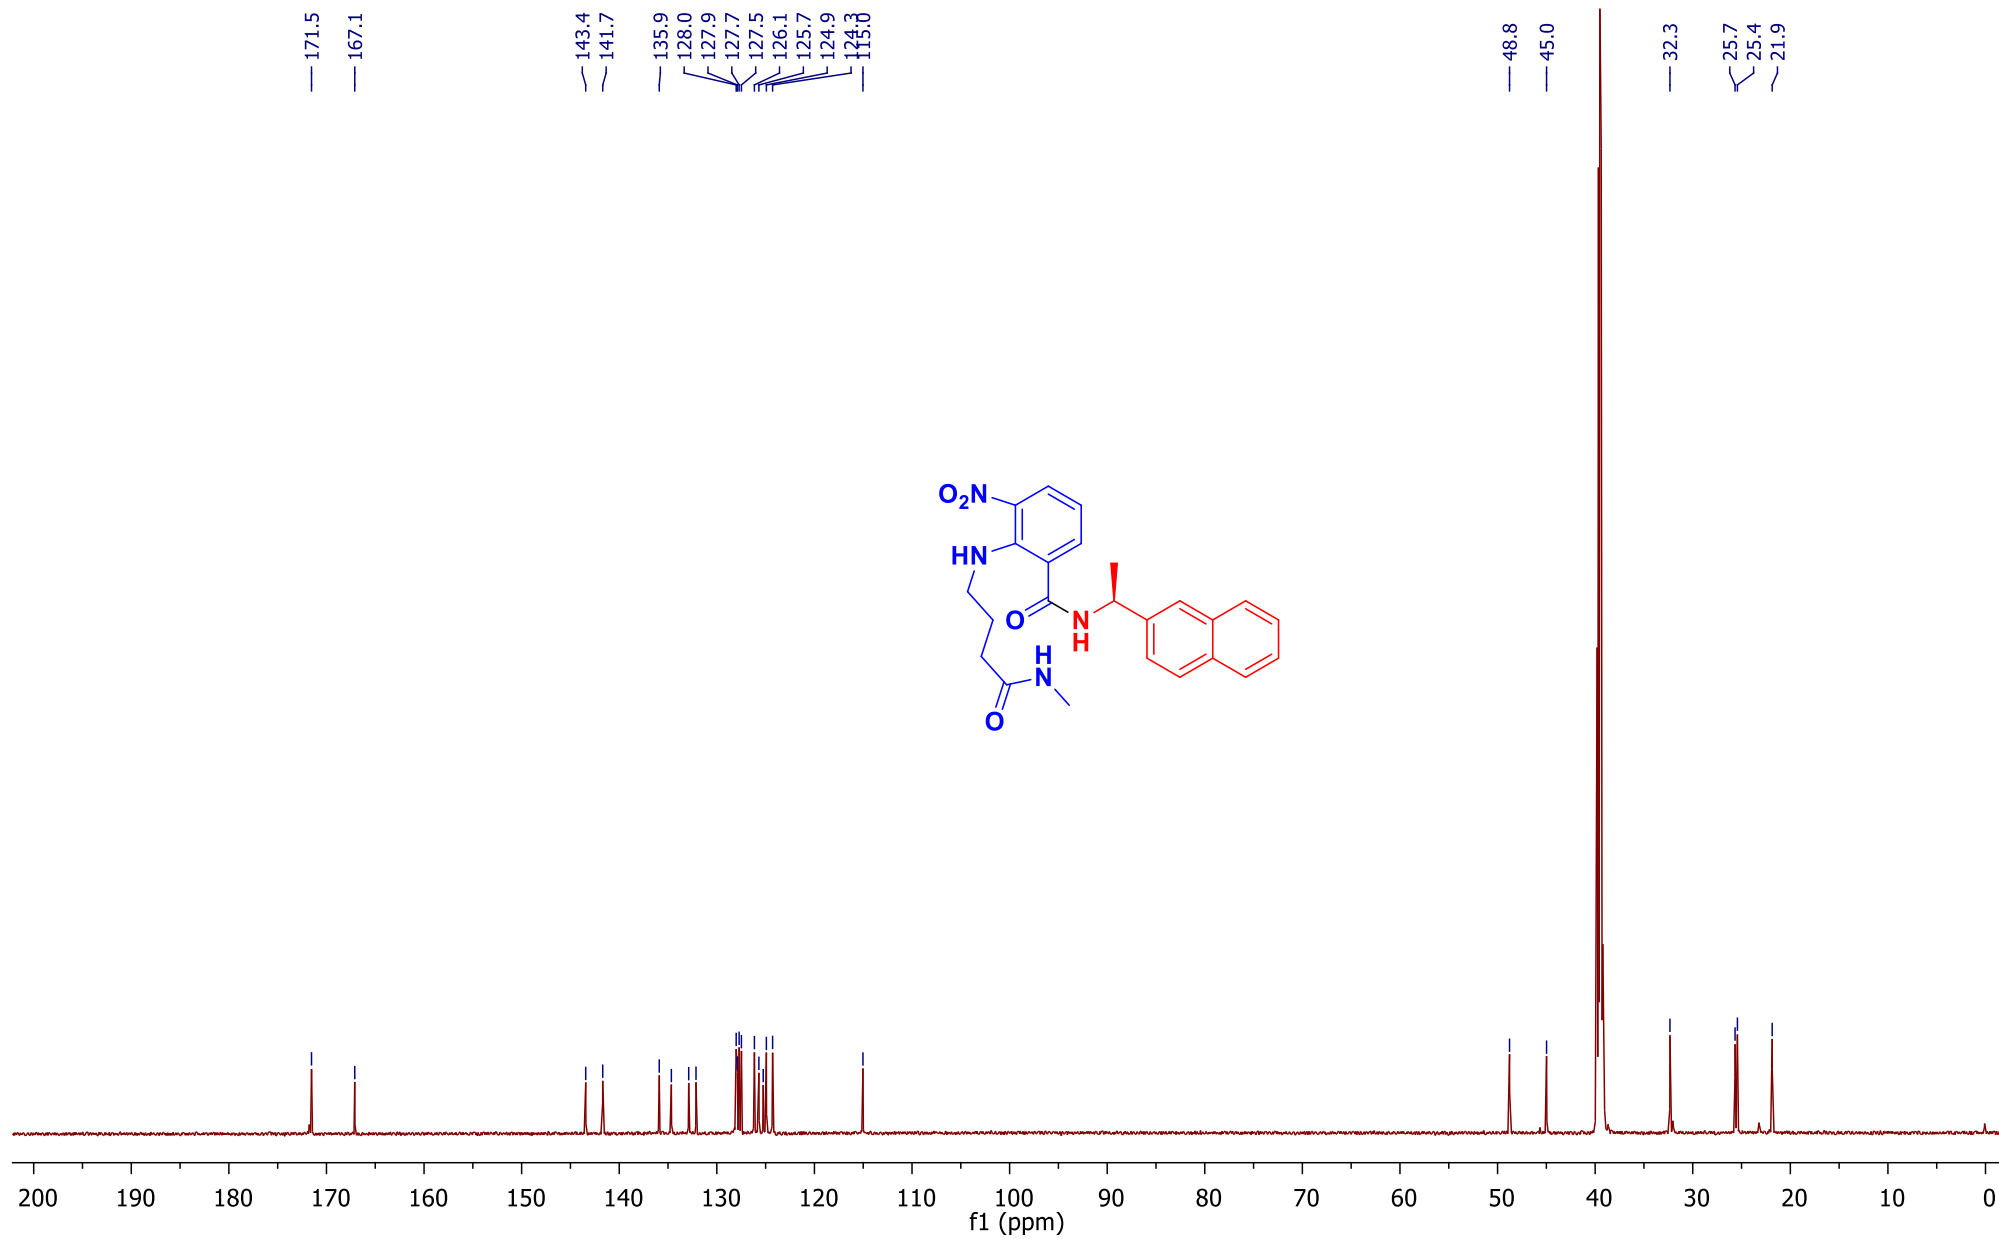

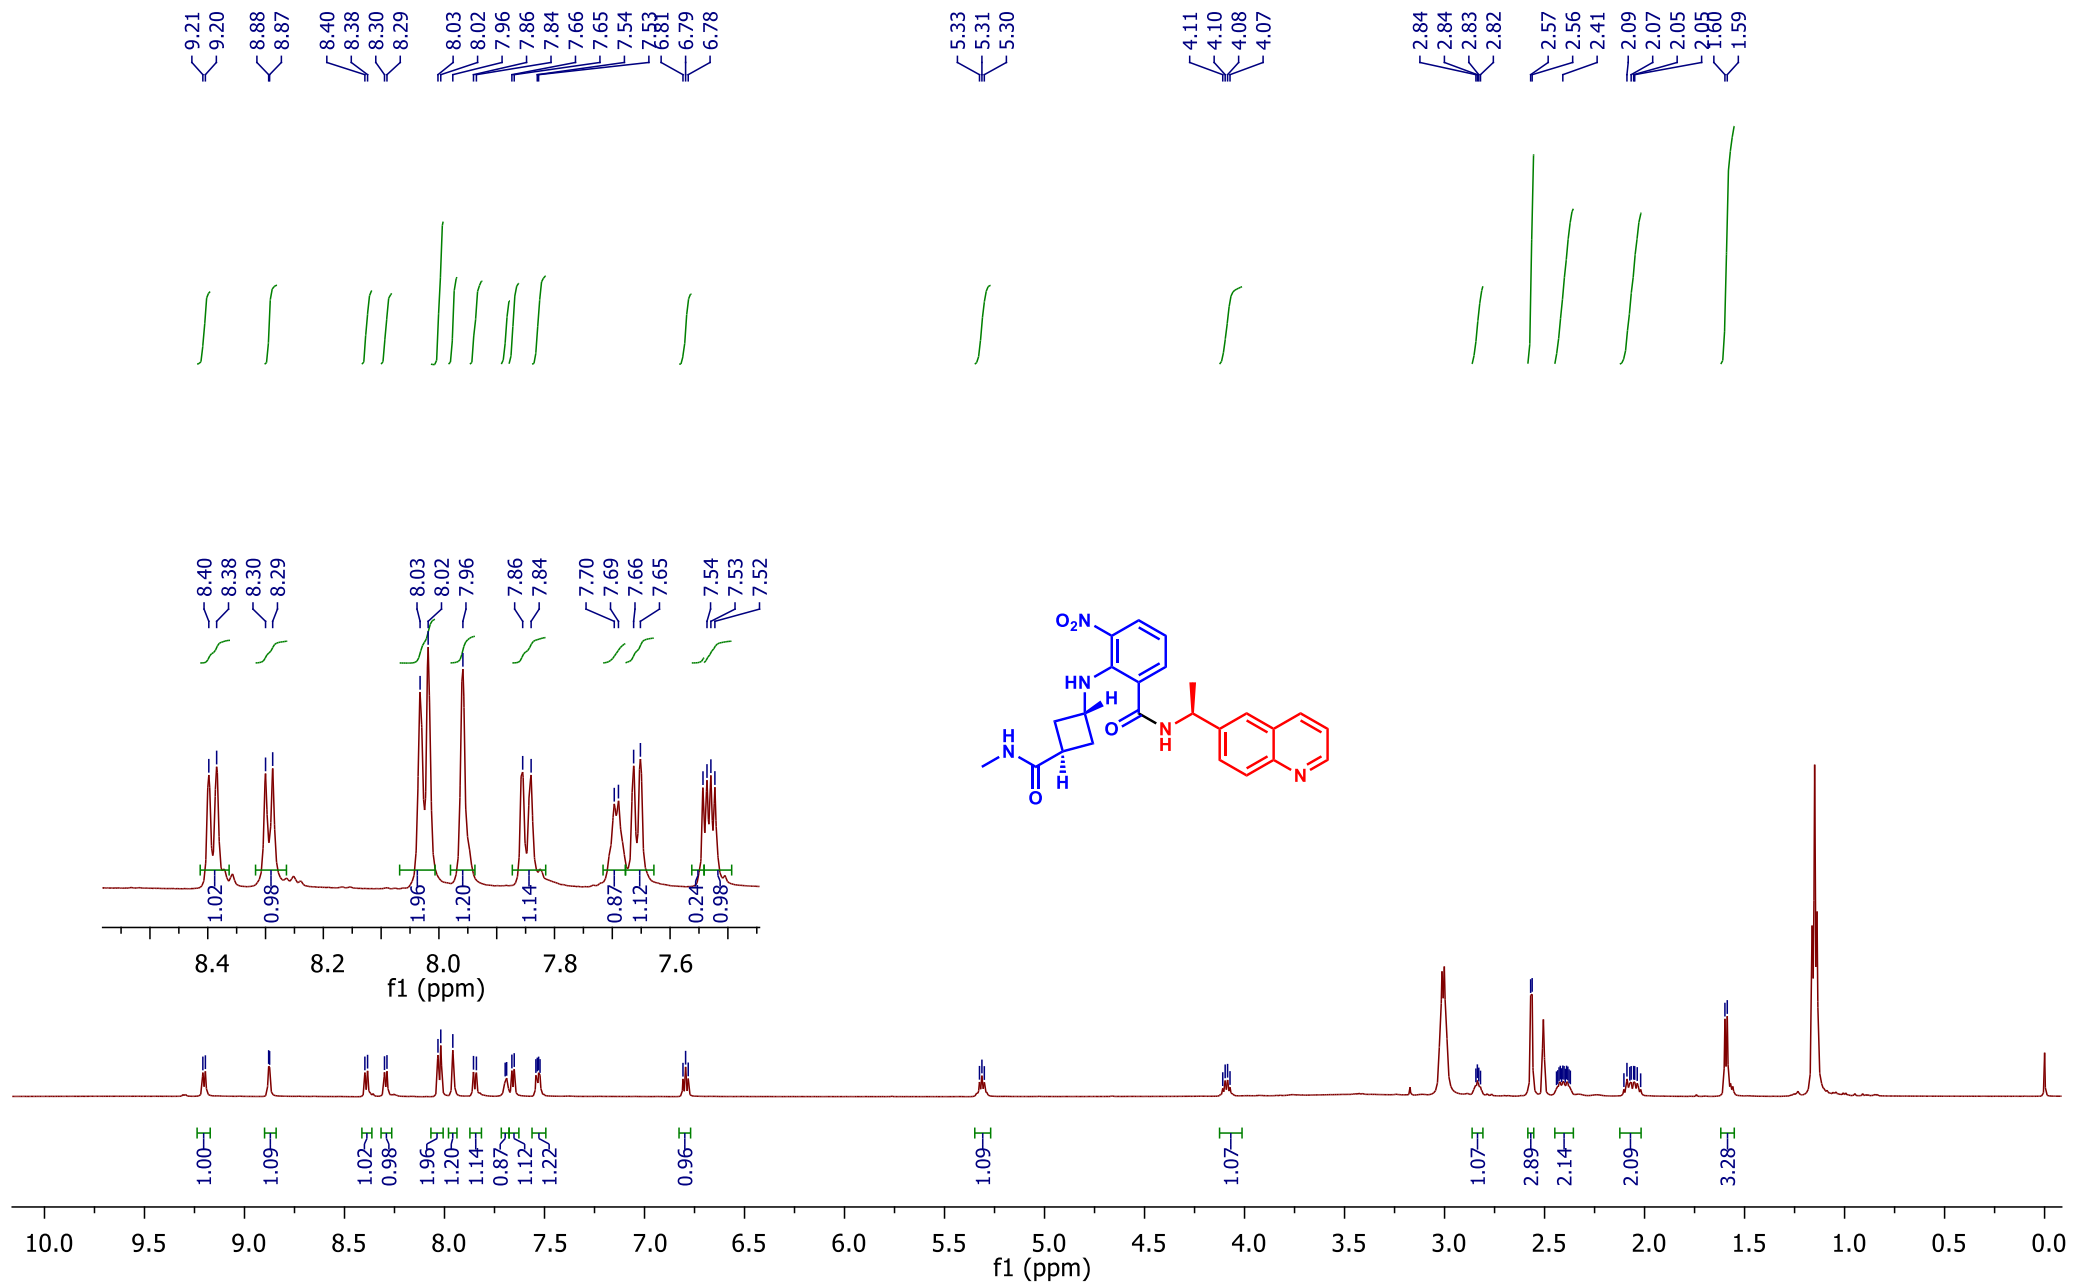

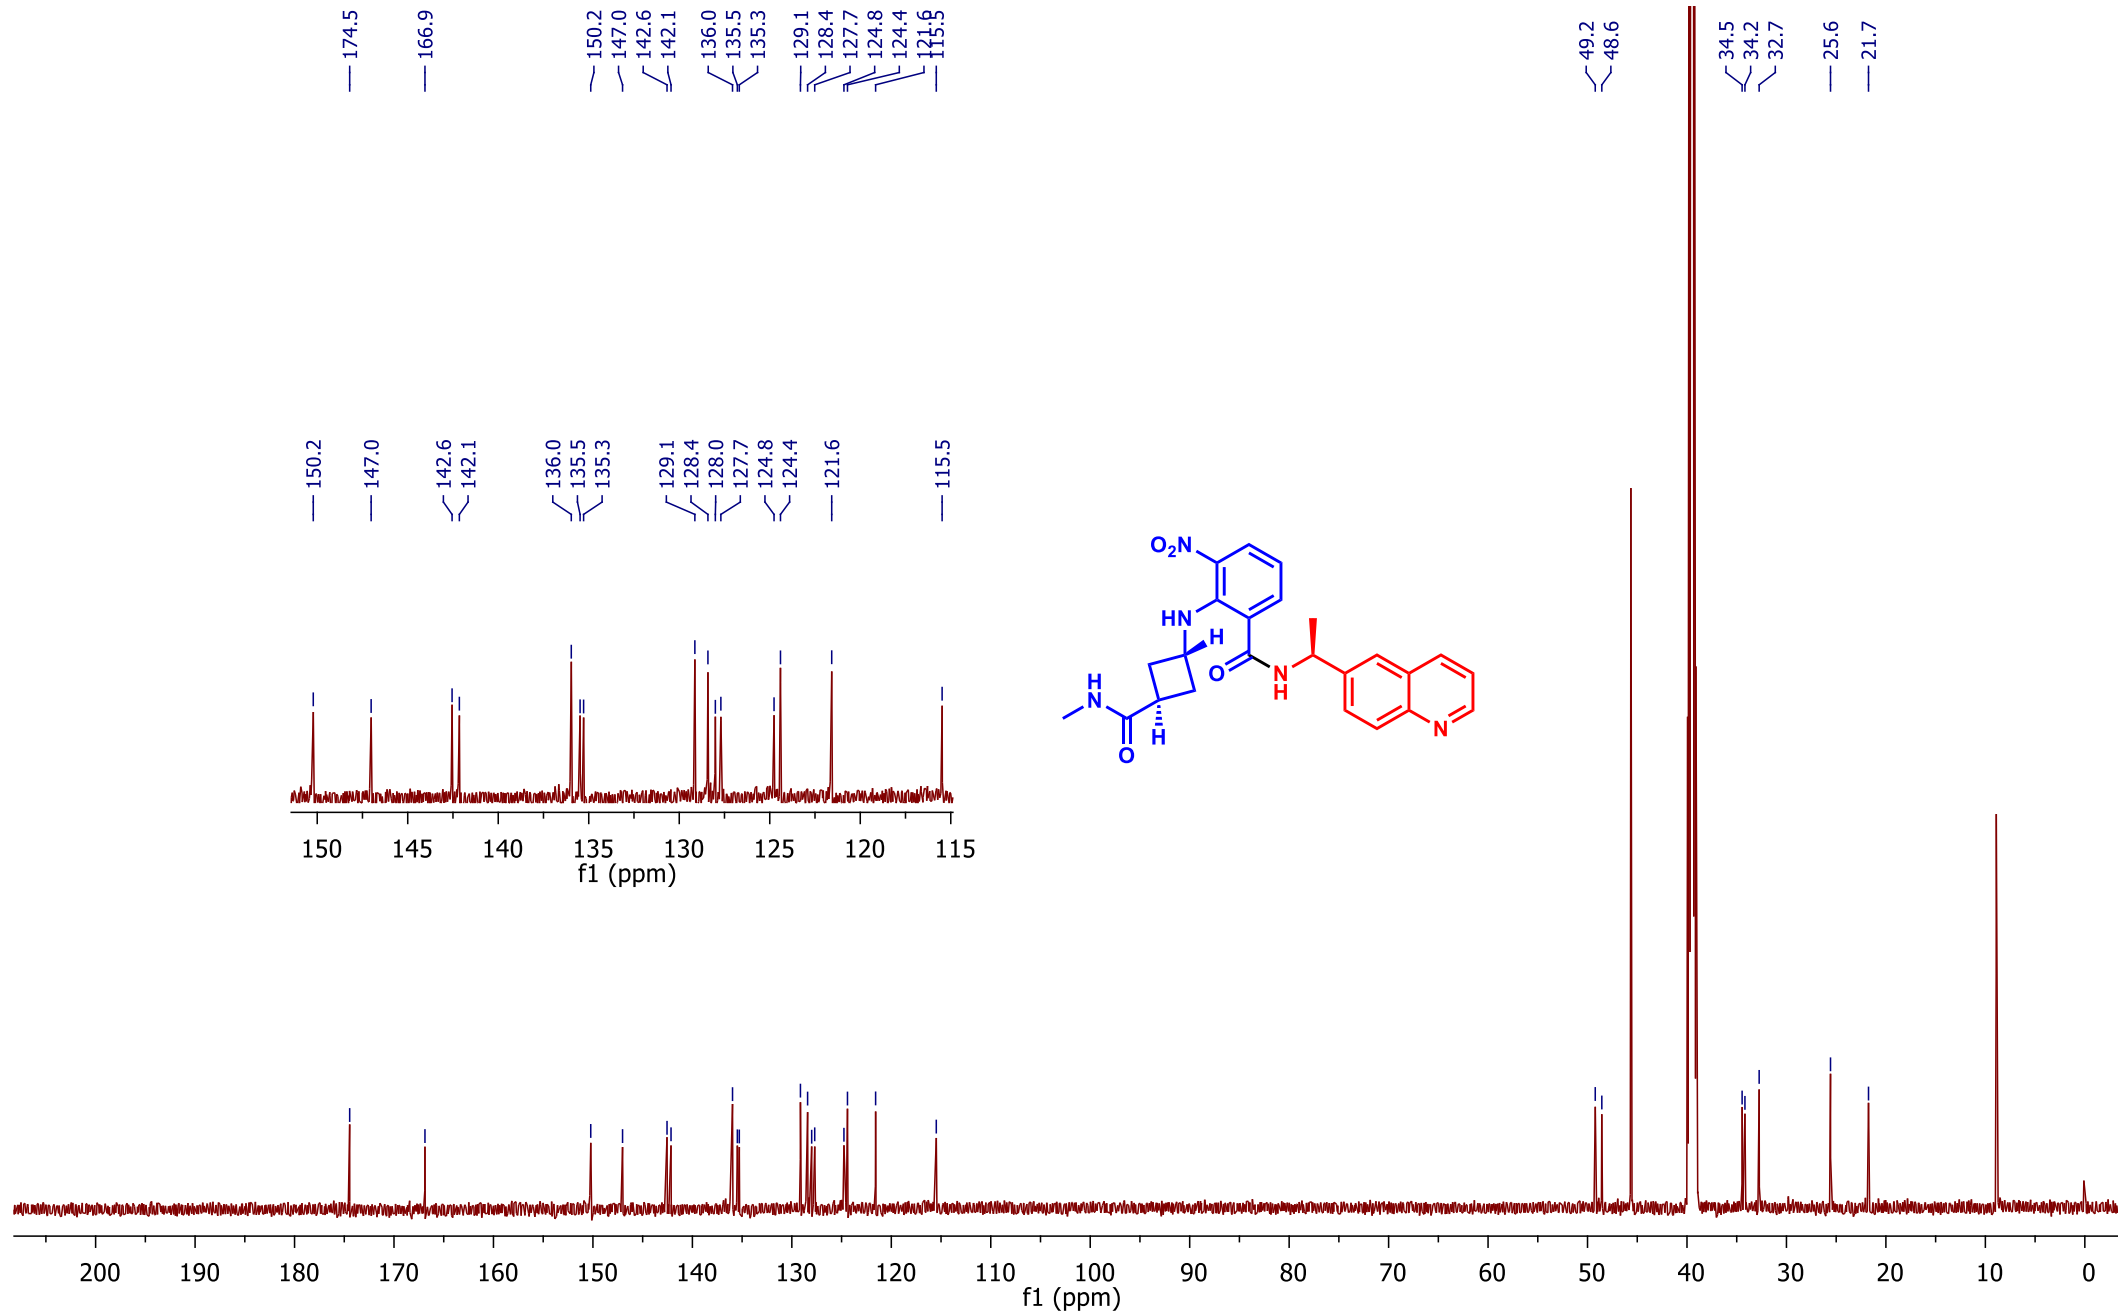



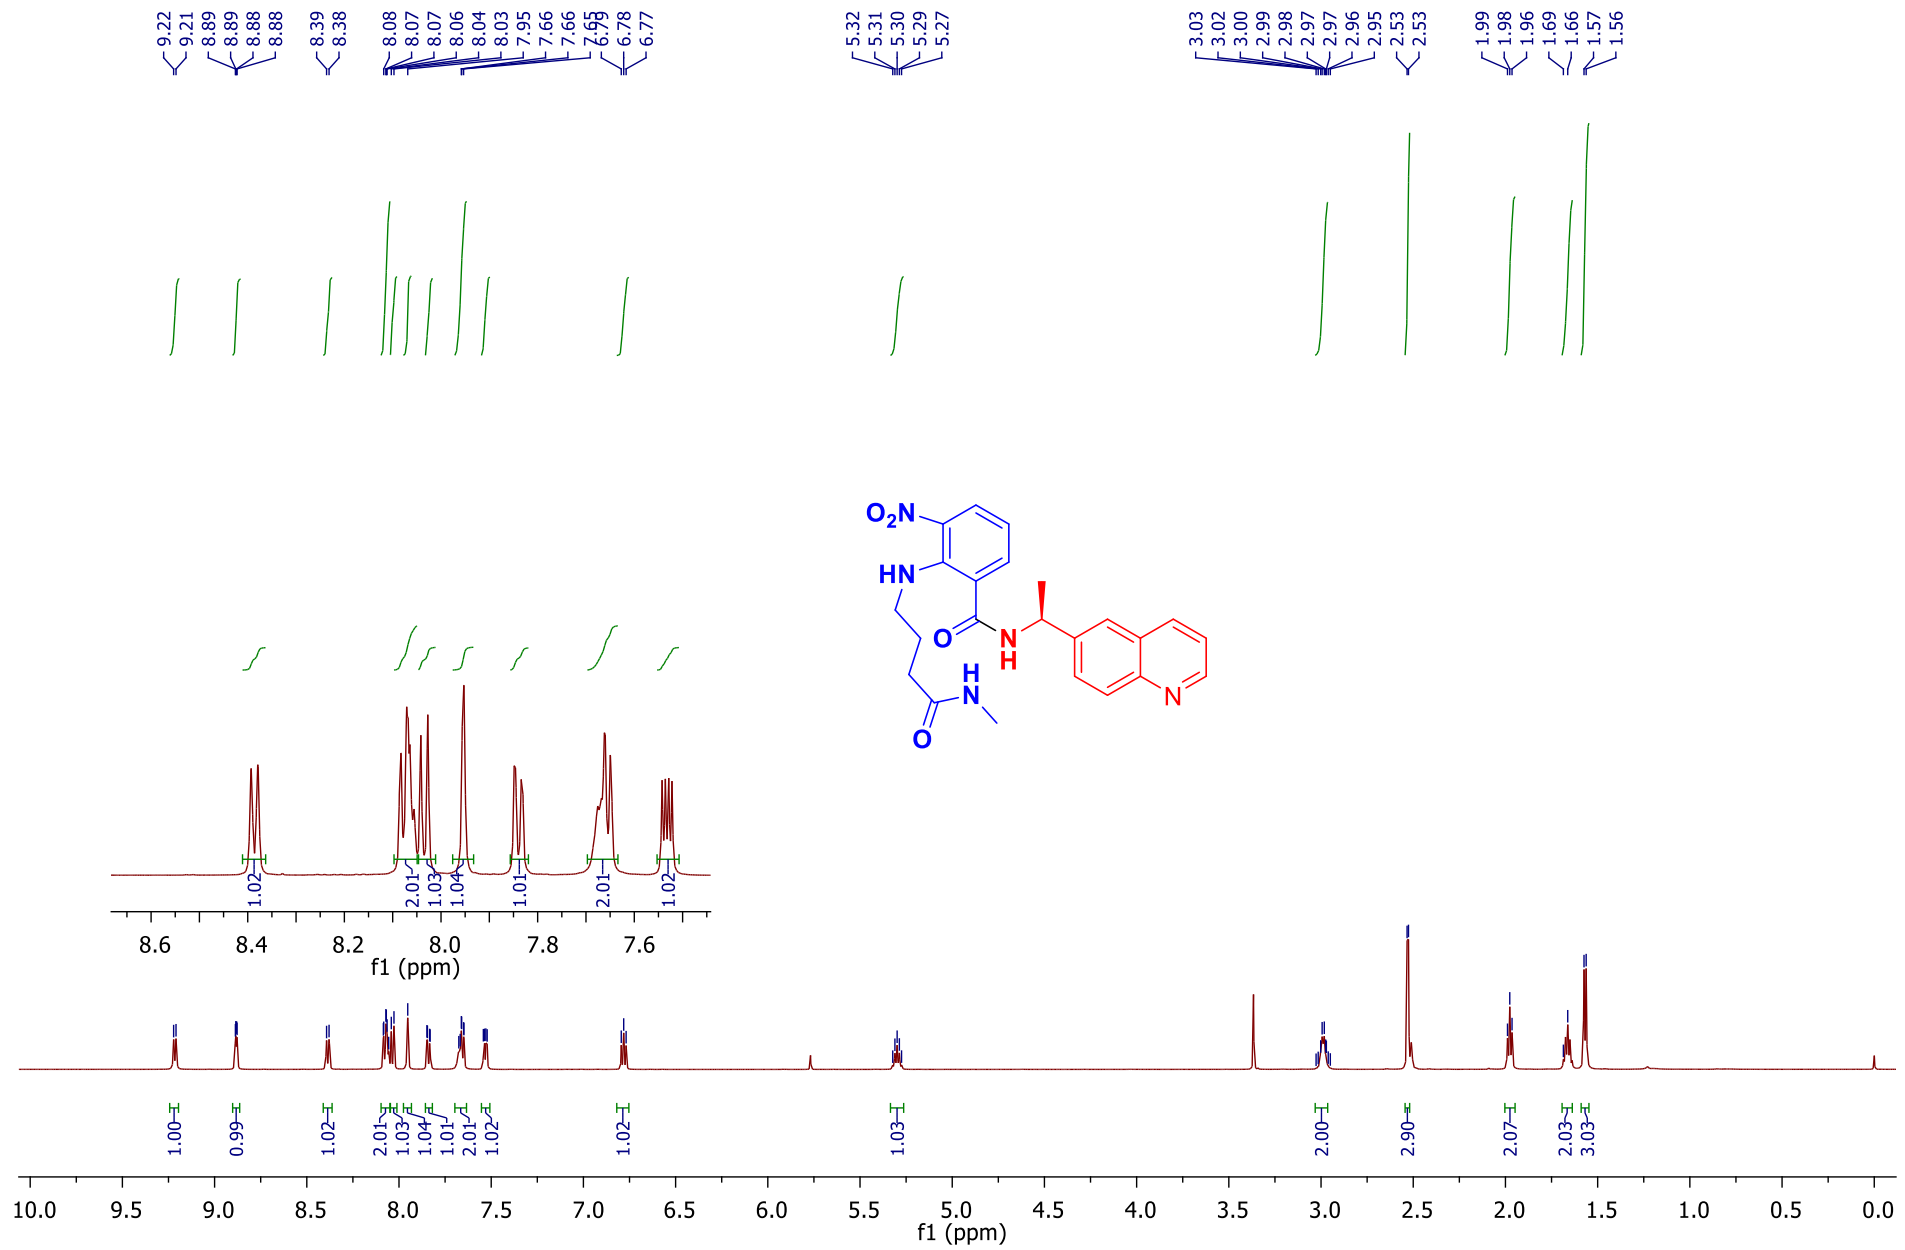

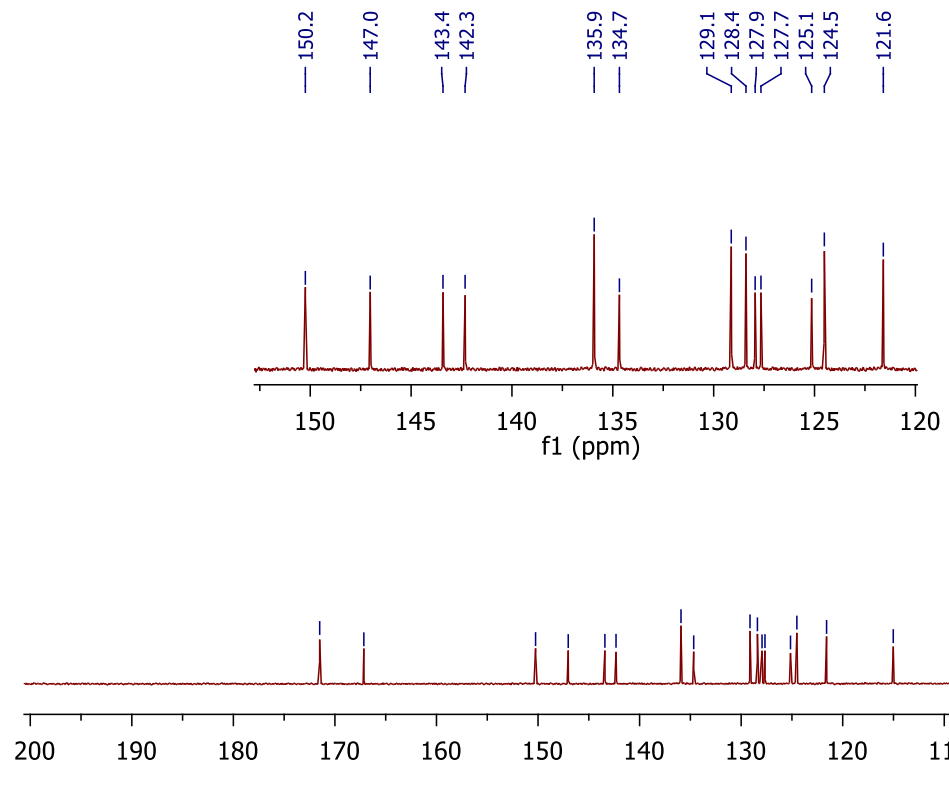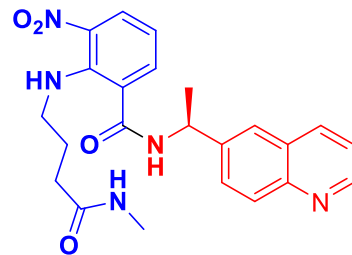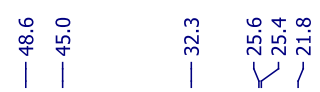

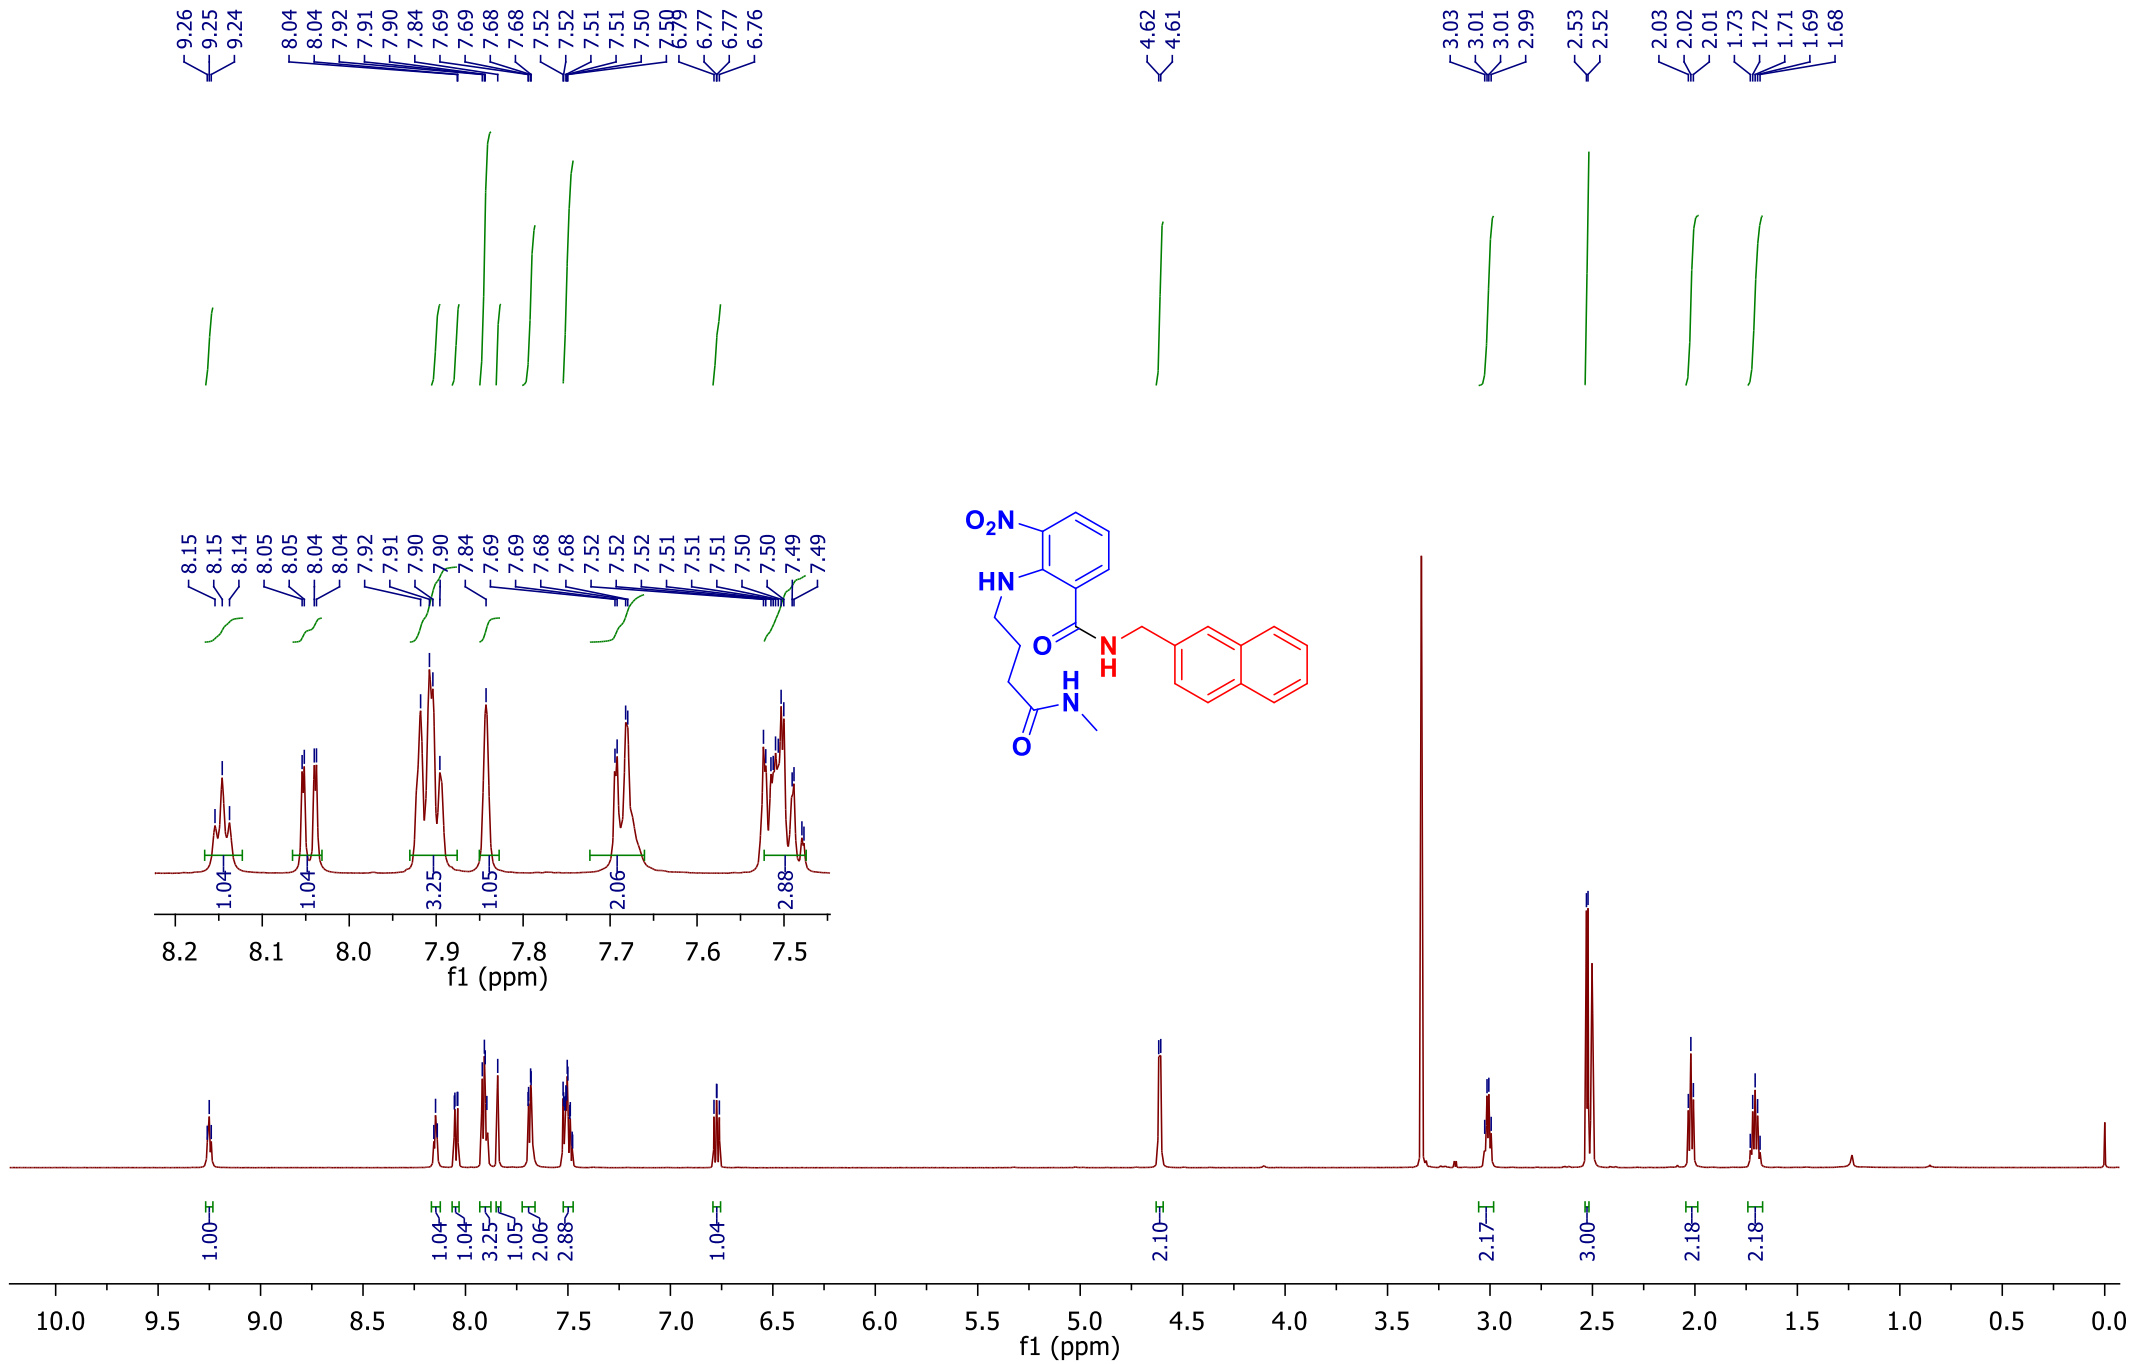

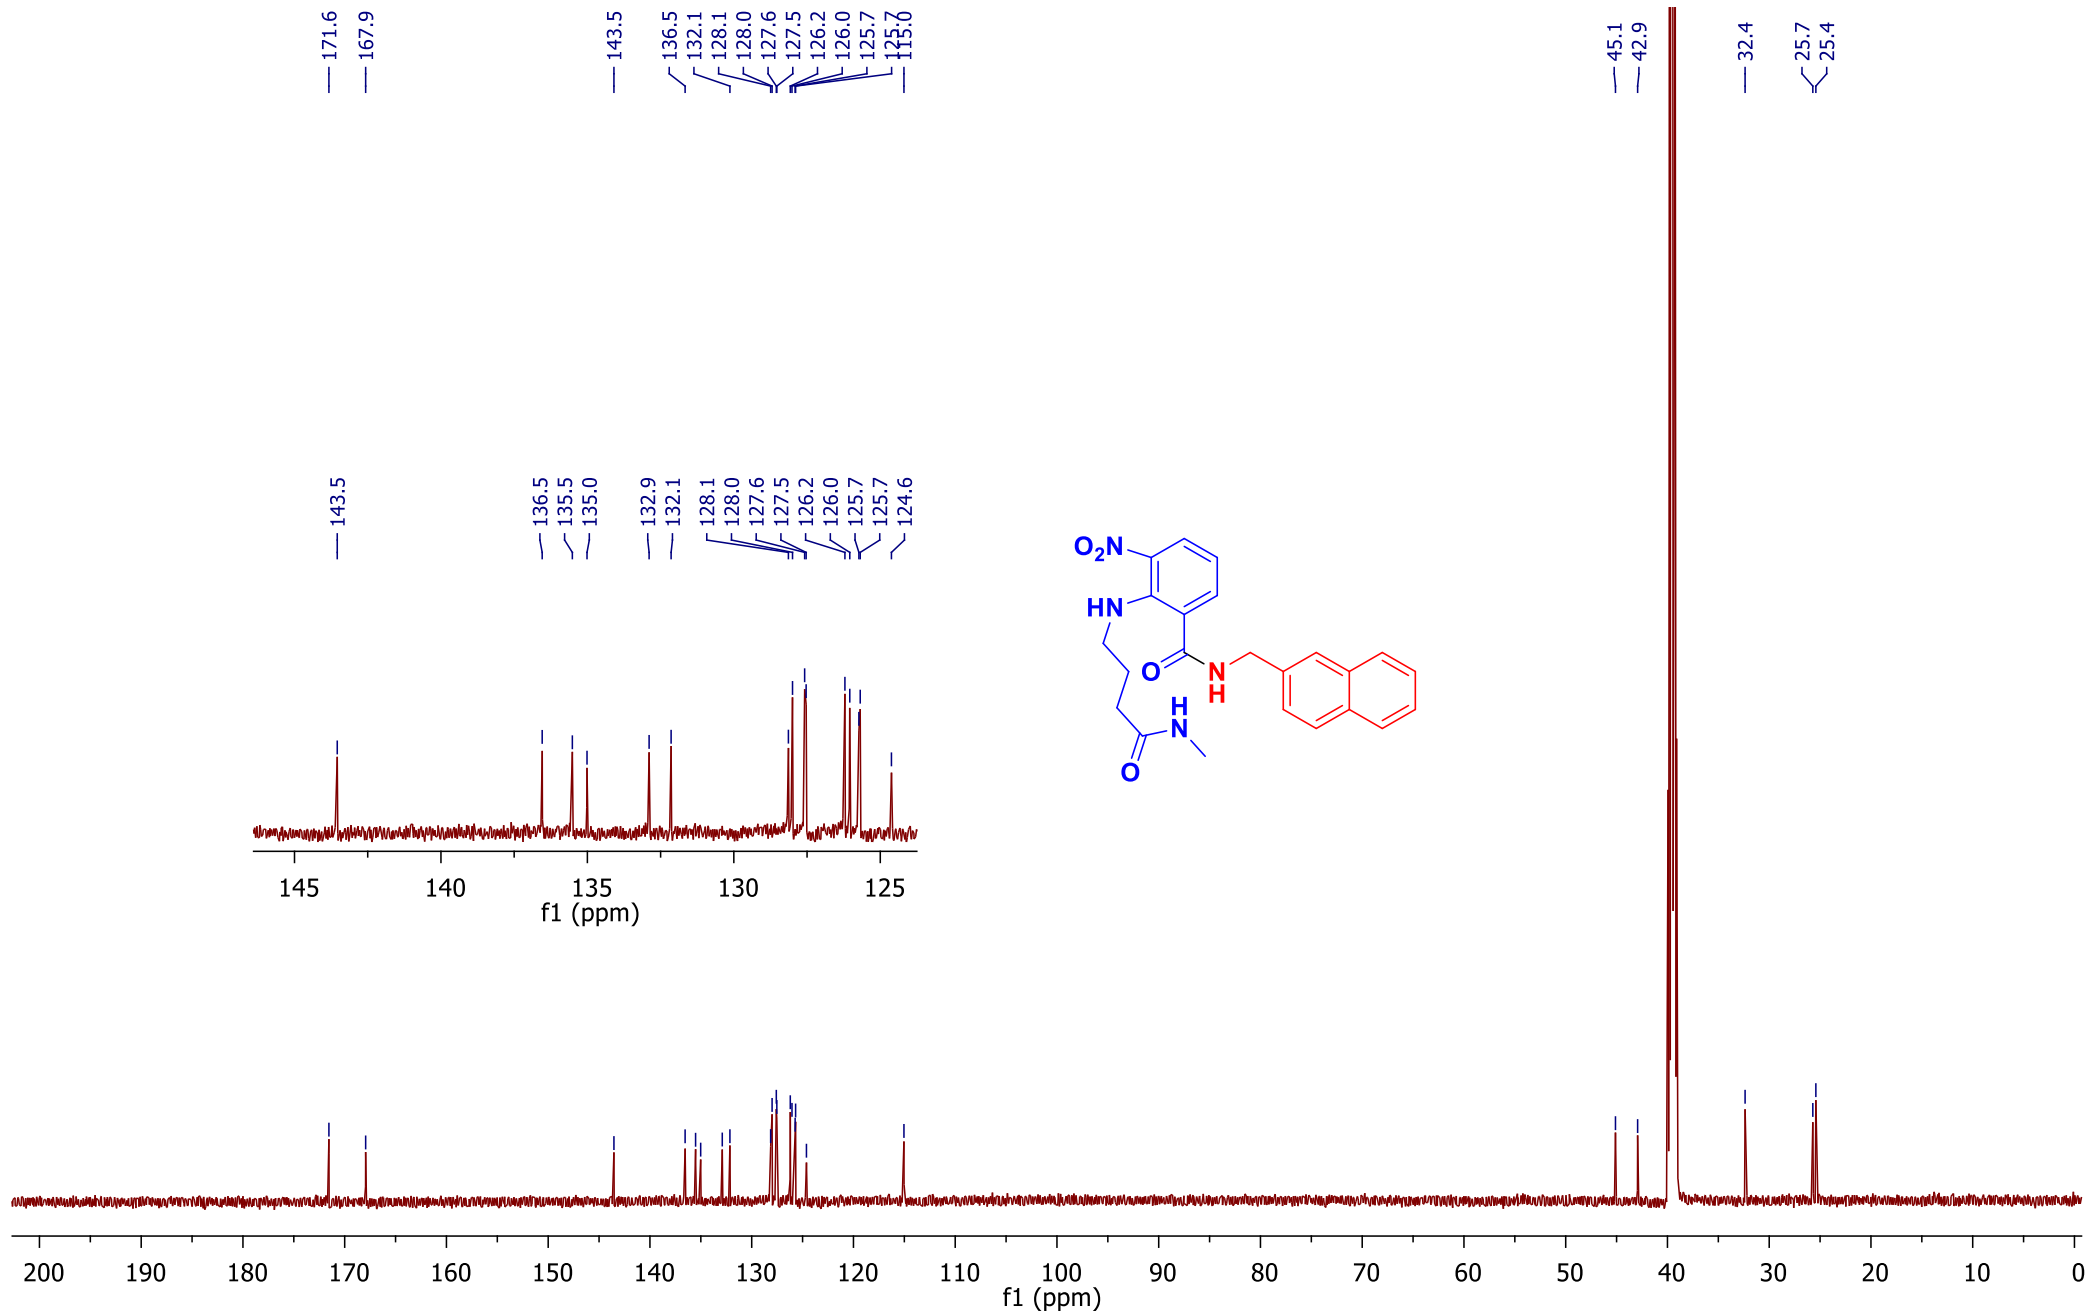

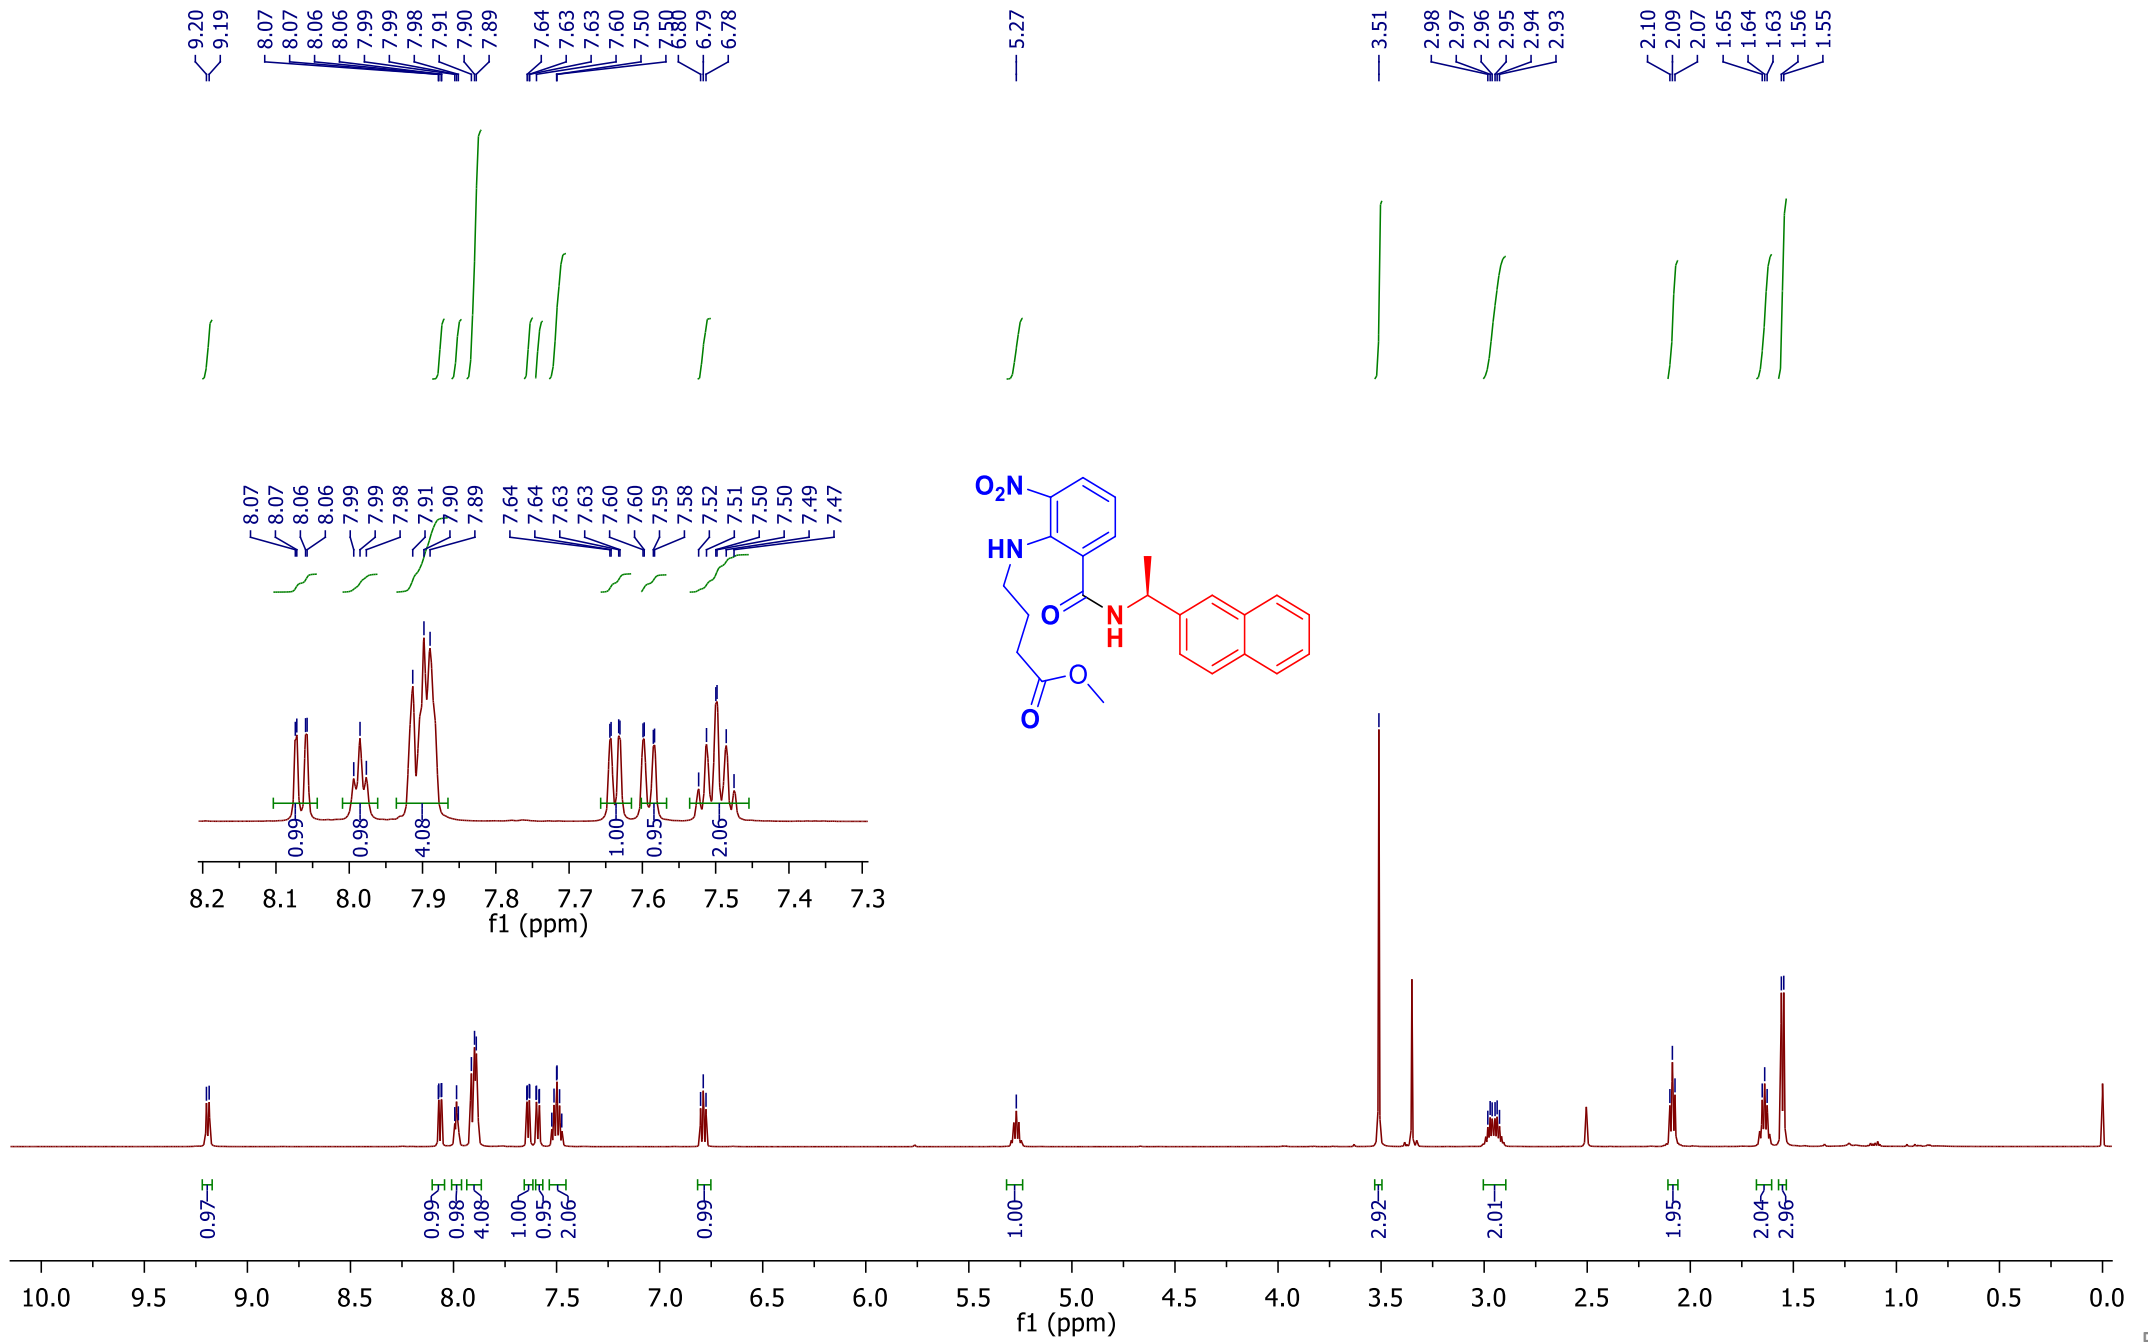

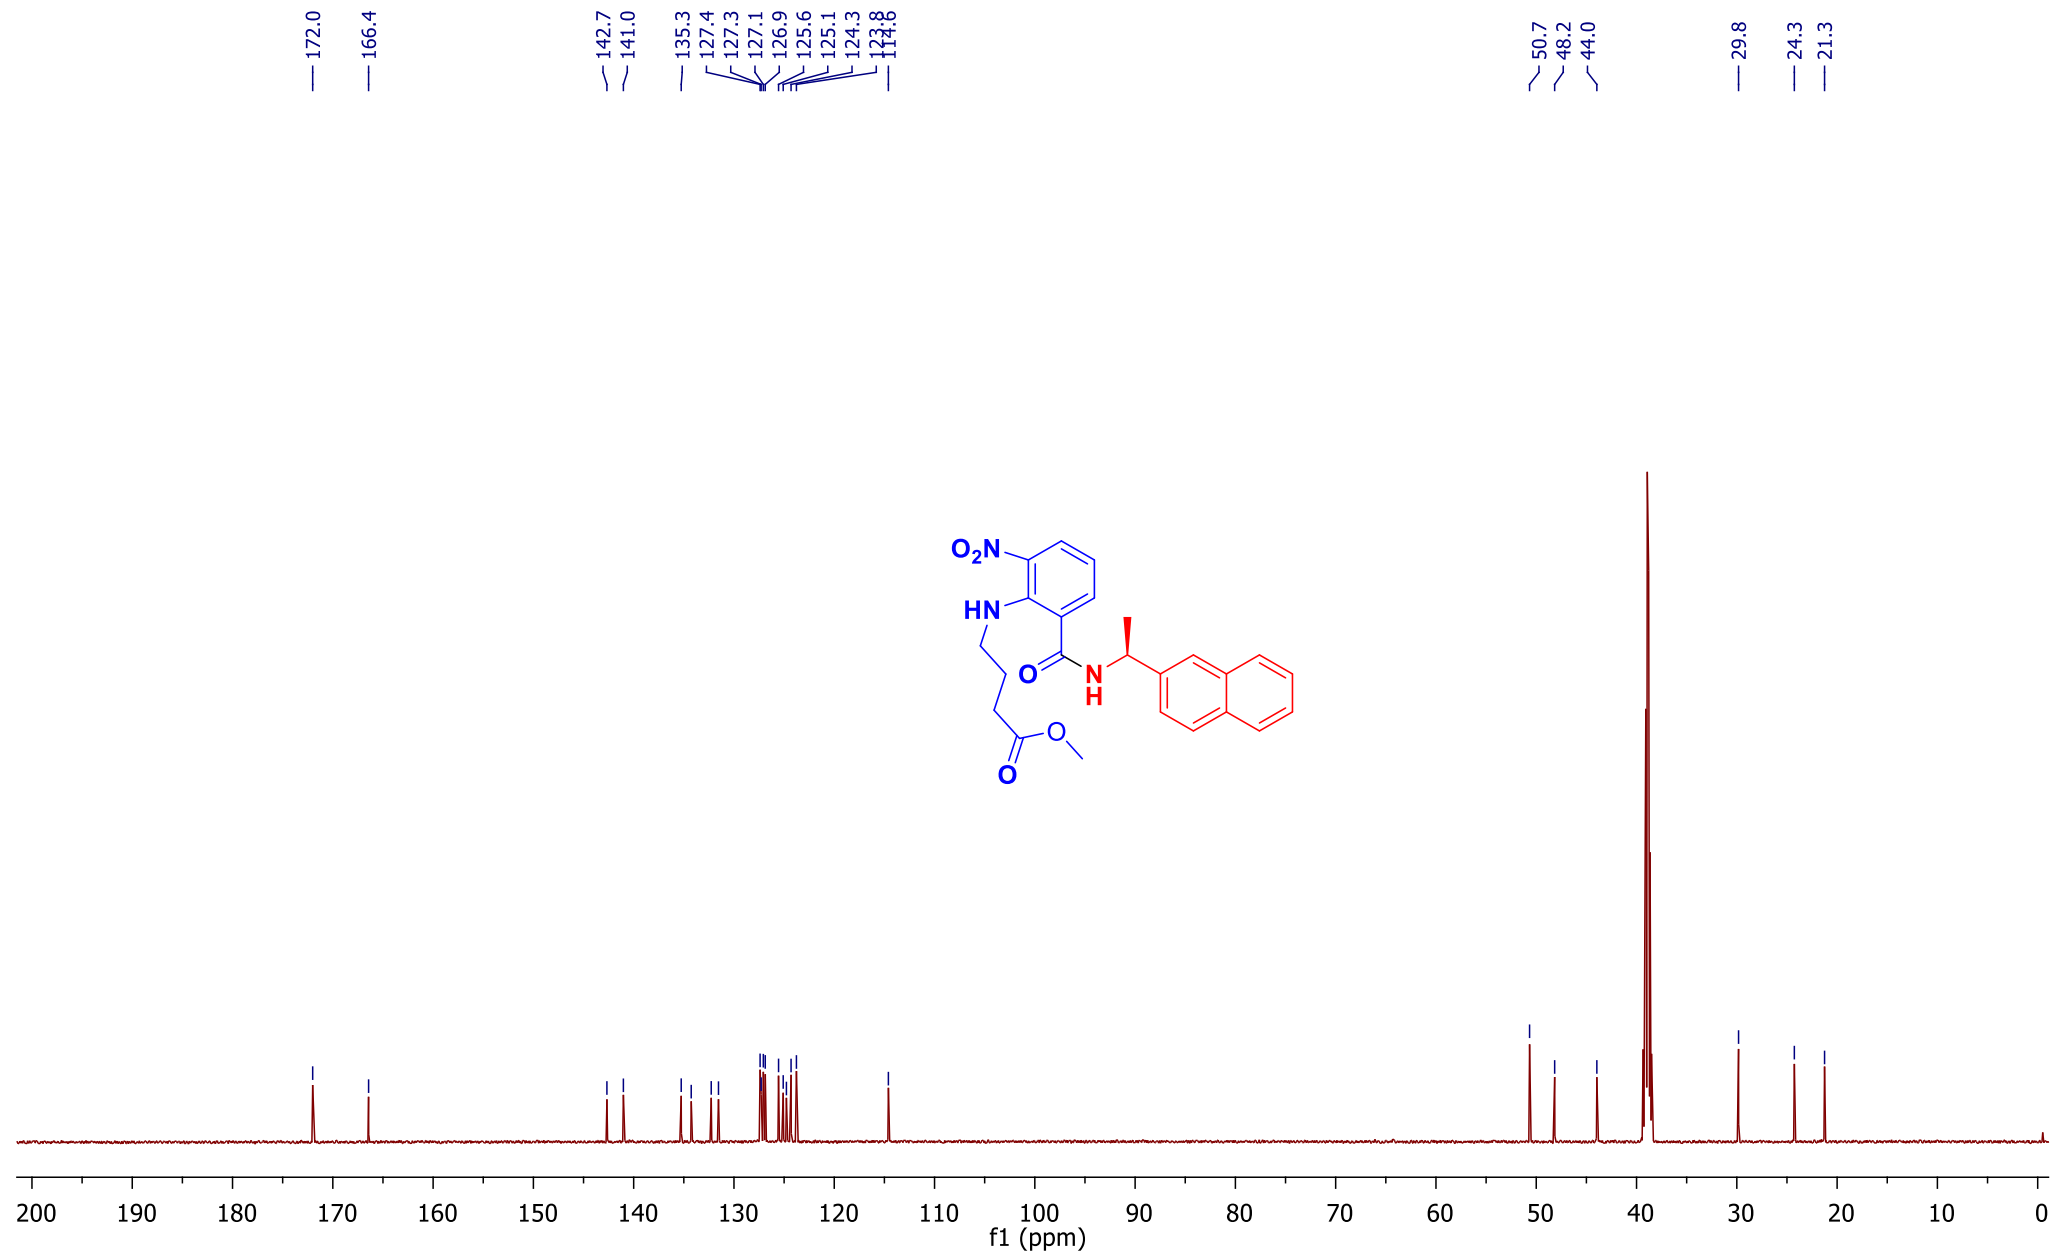

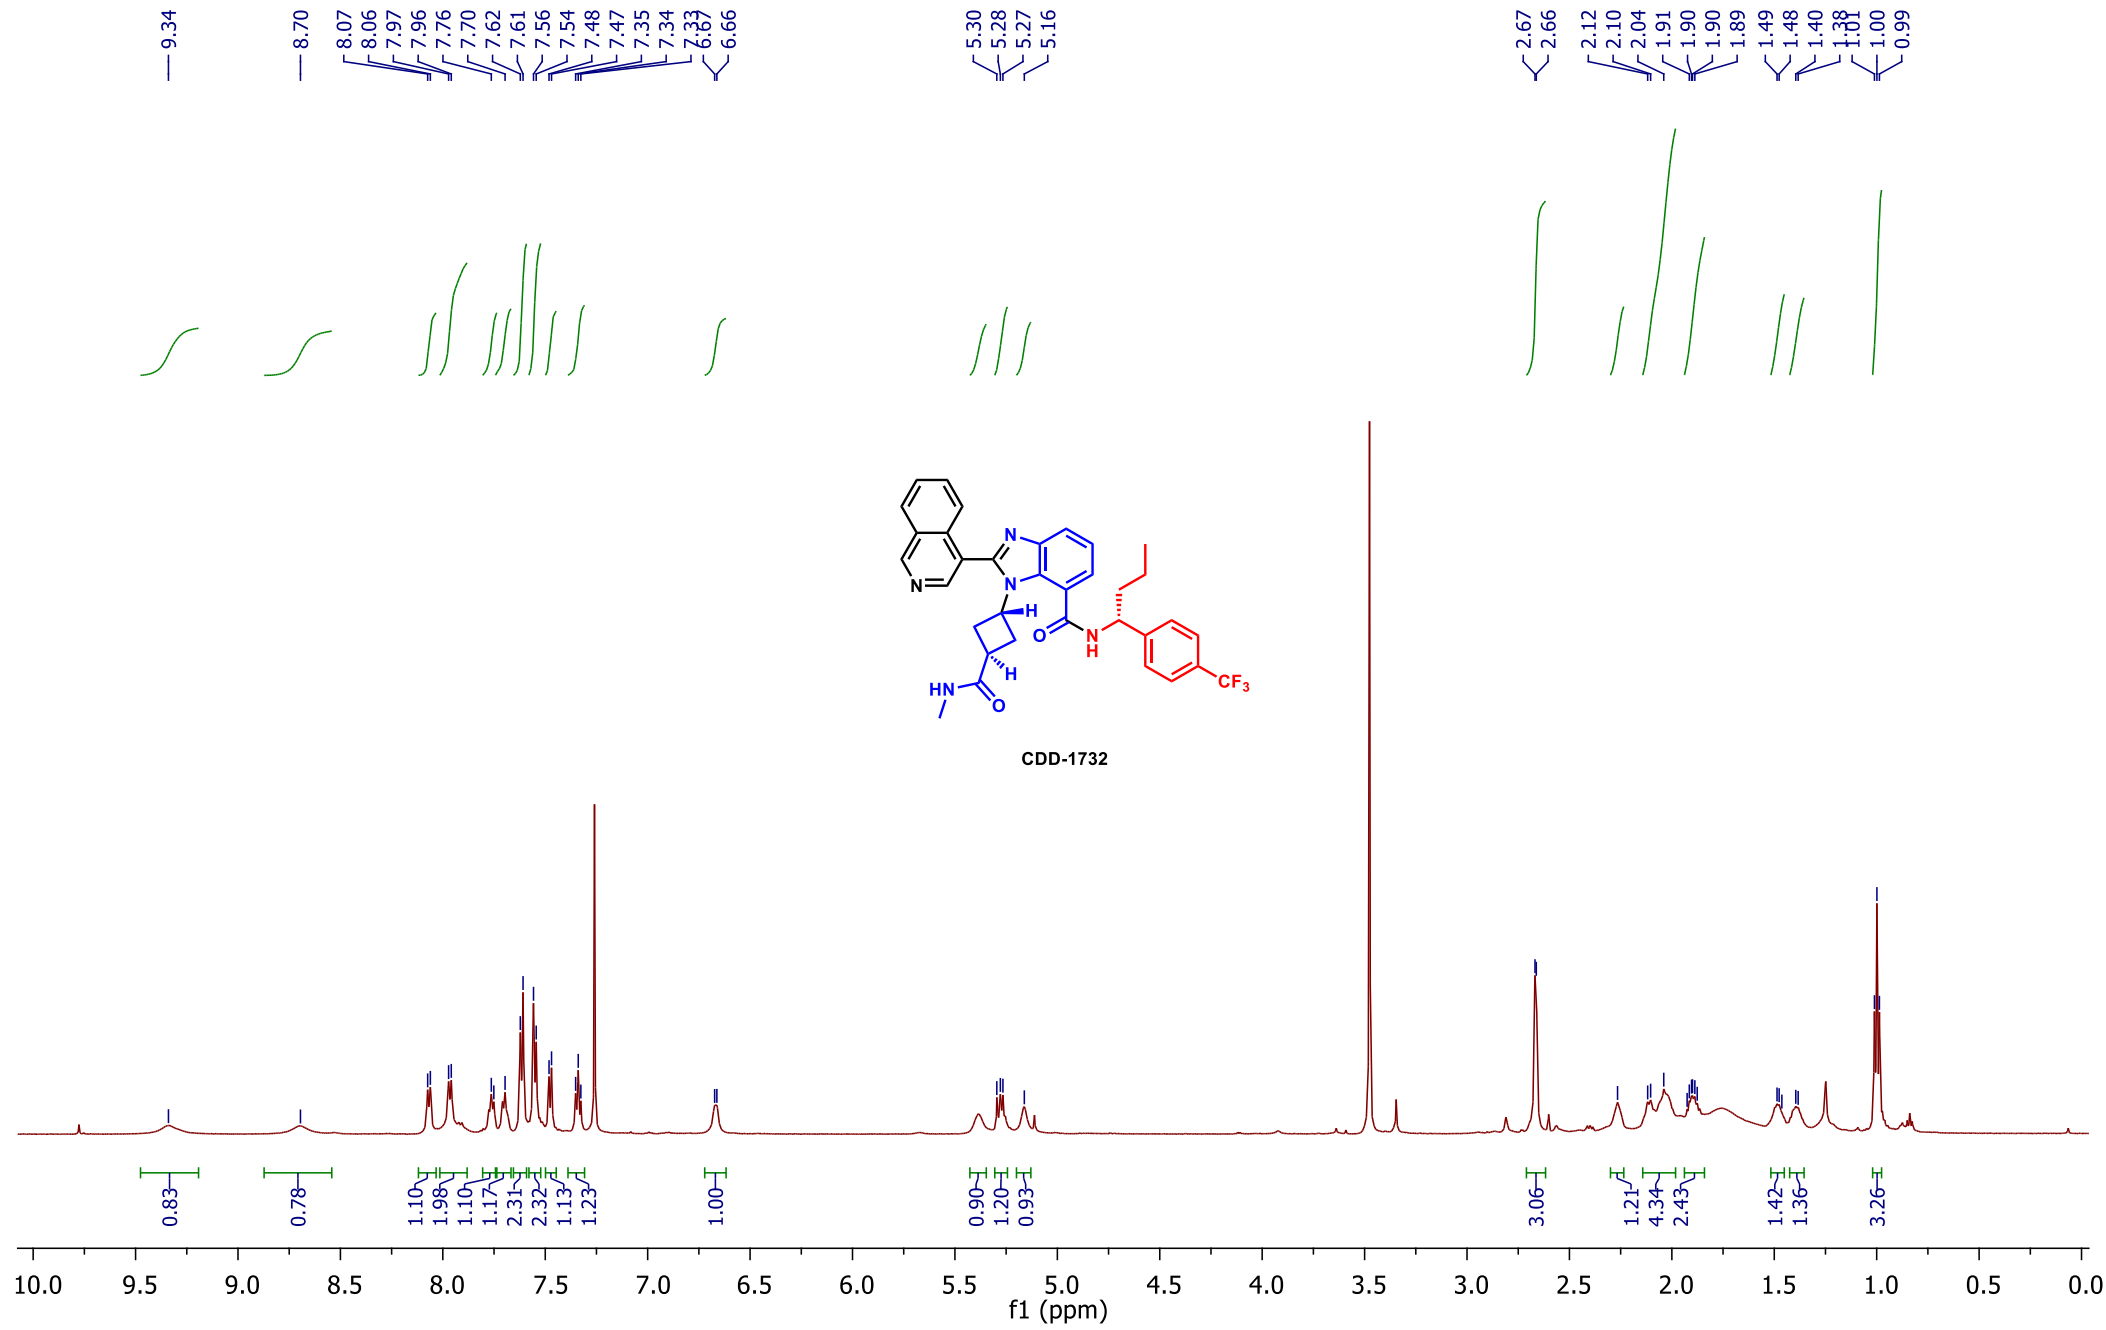

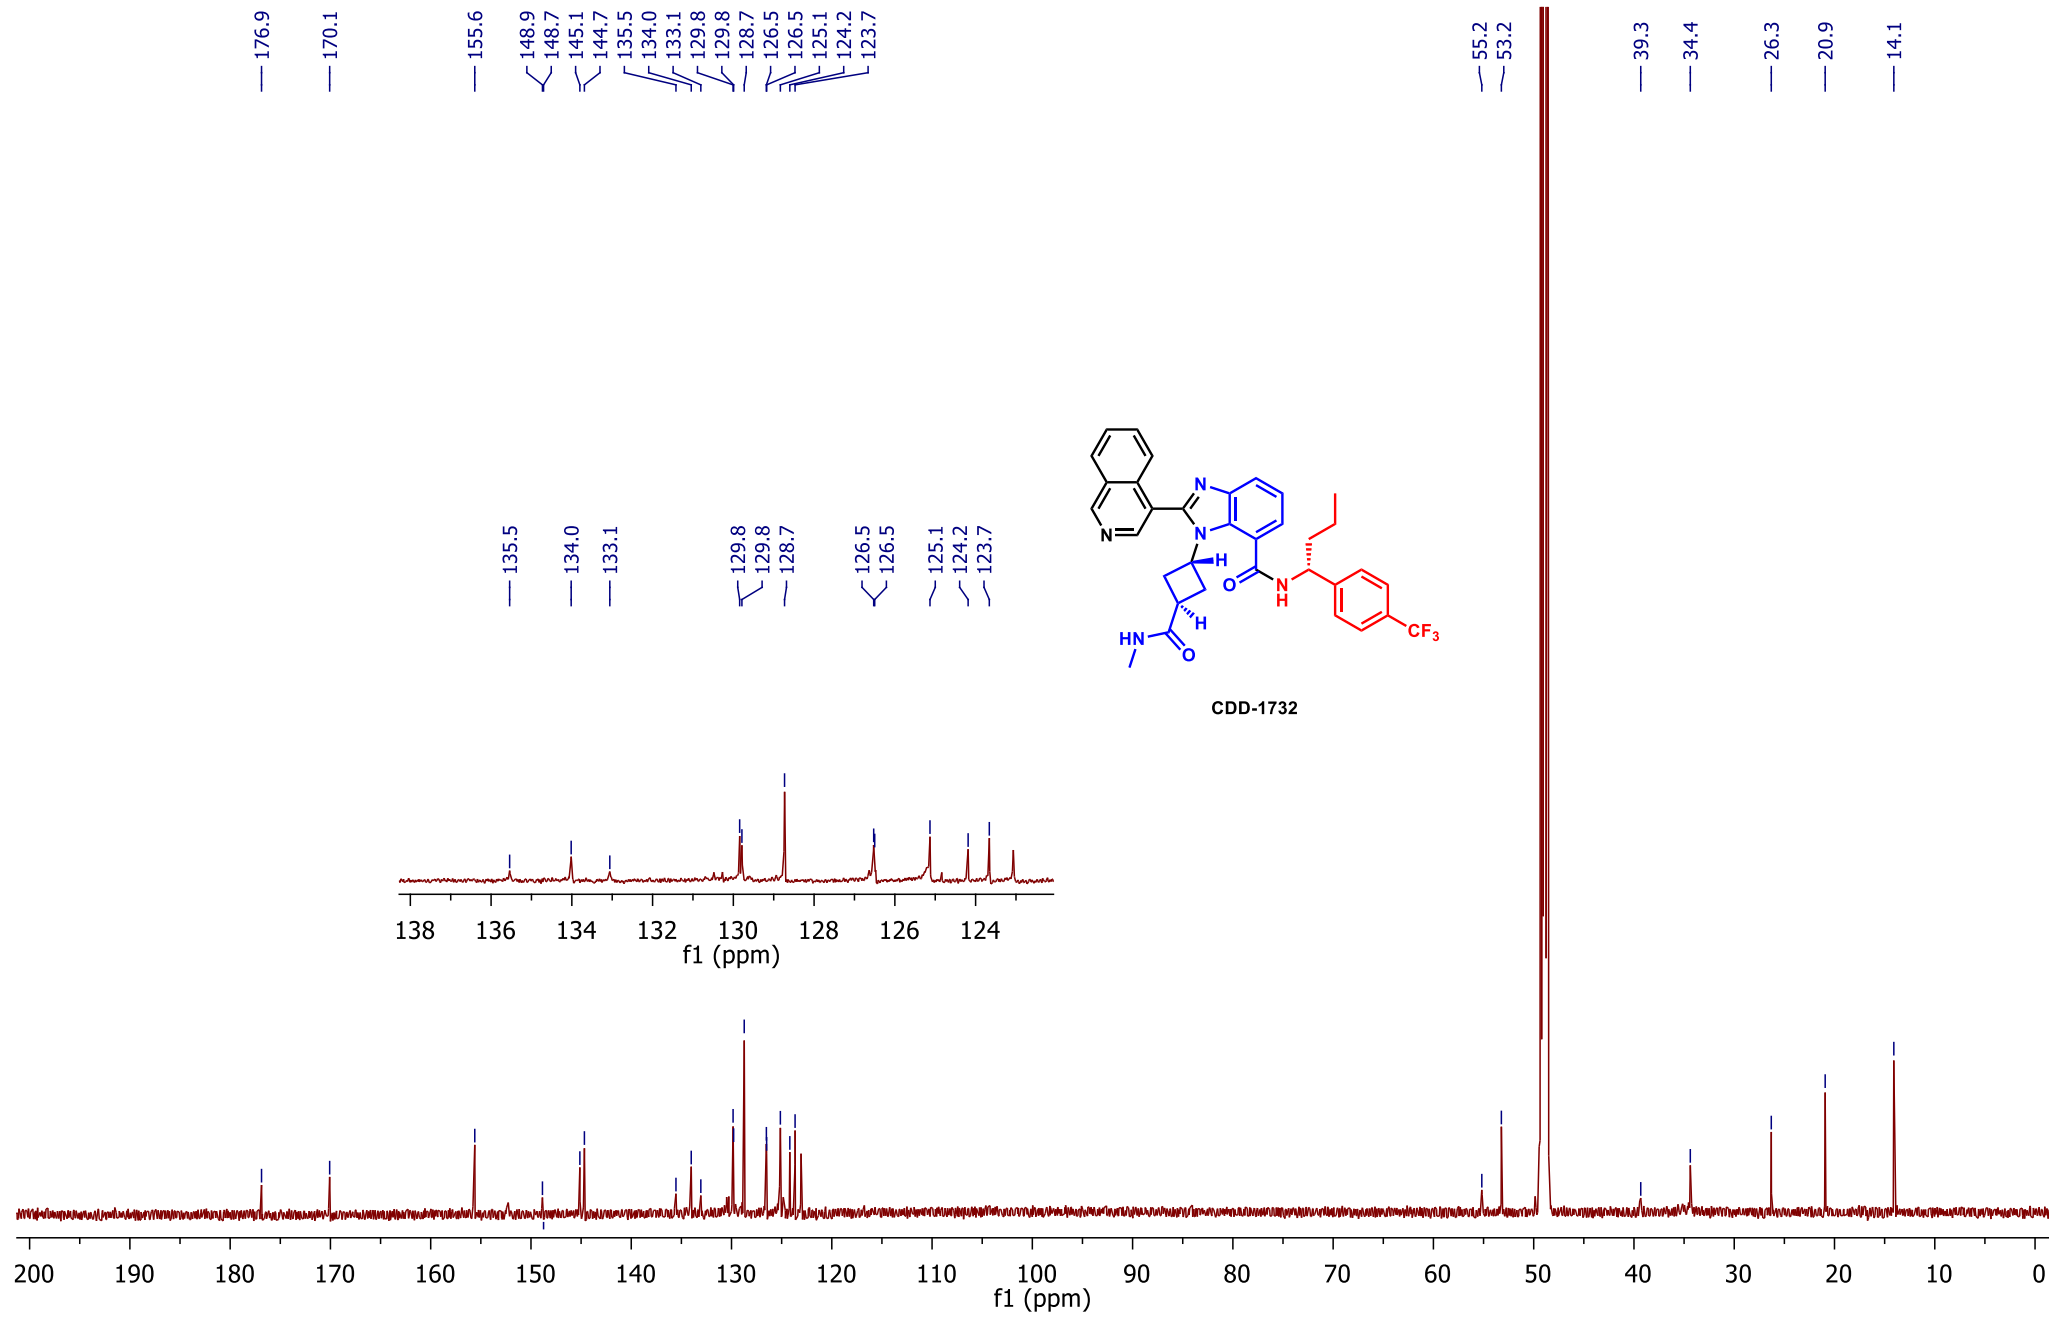



RT: 0.00 - 7.00 SM: 7B

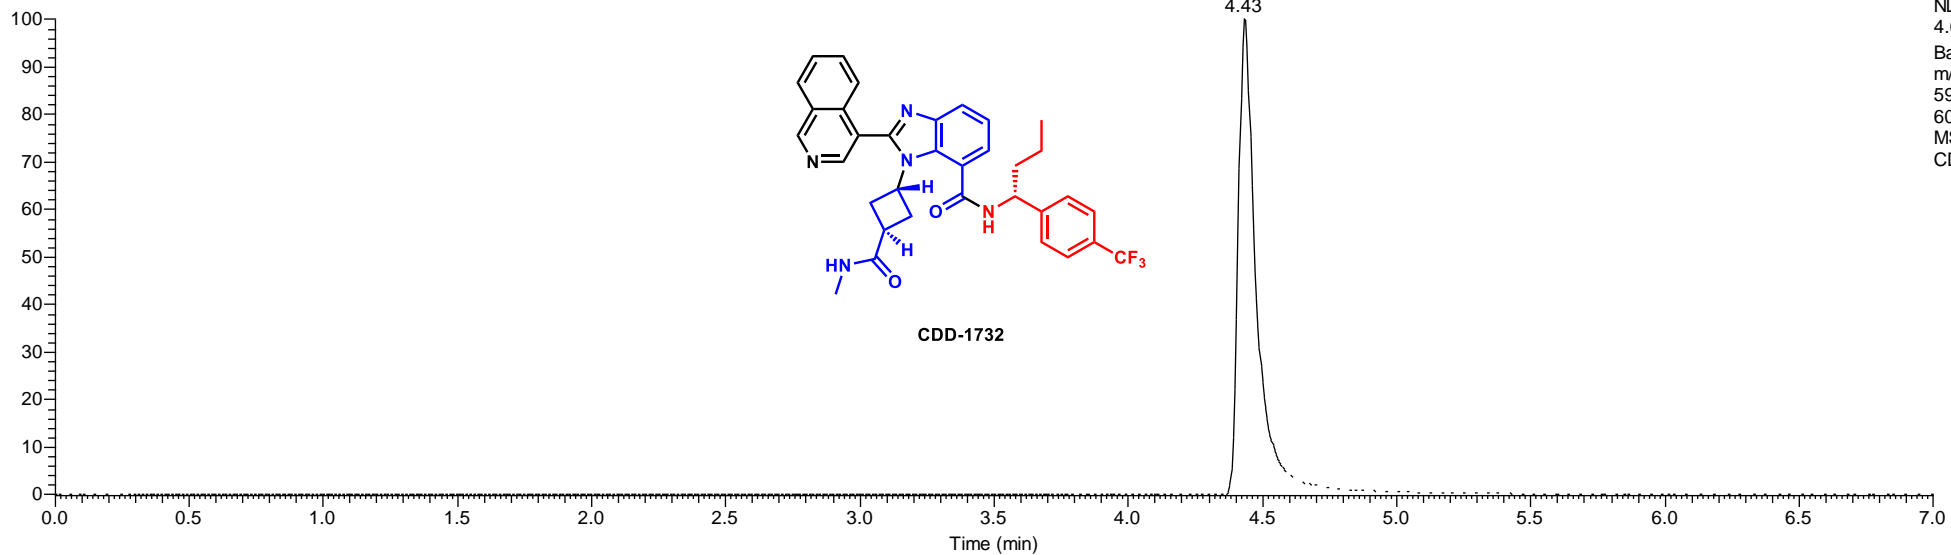

CDD1732 #573 RT: 4.43 AV: 1 NL: 5.10E9  
T: FTMS + p ESI Full ms [100.0000-1000.0000]

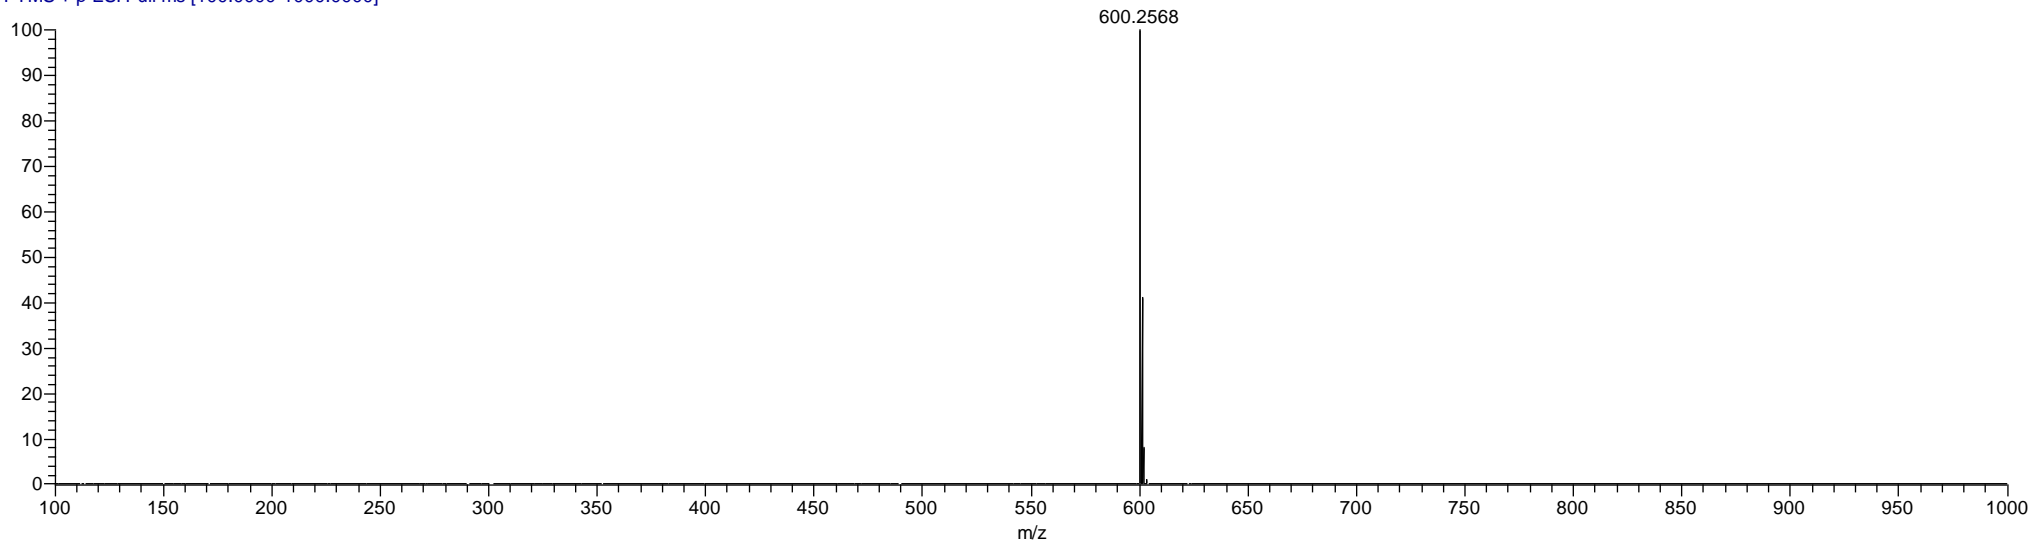

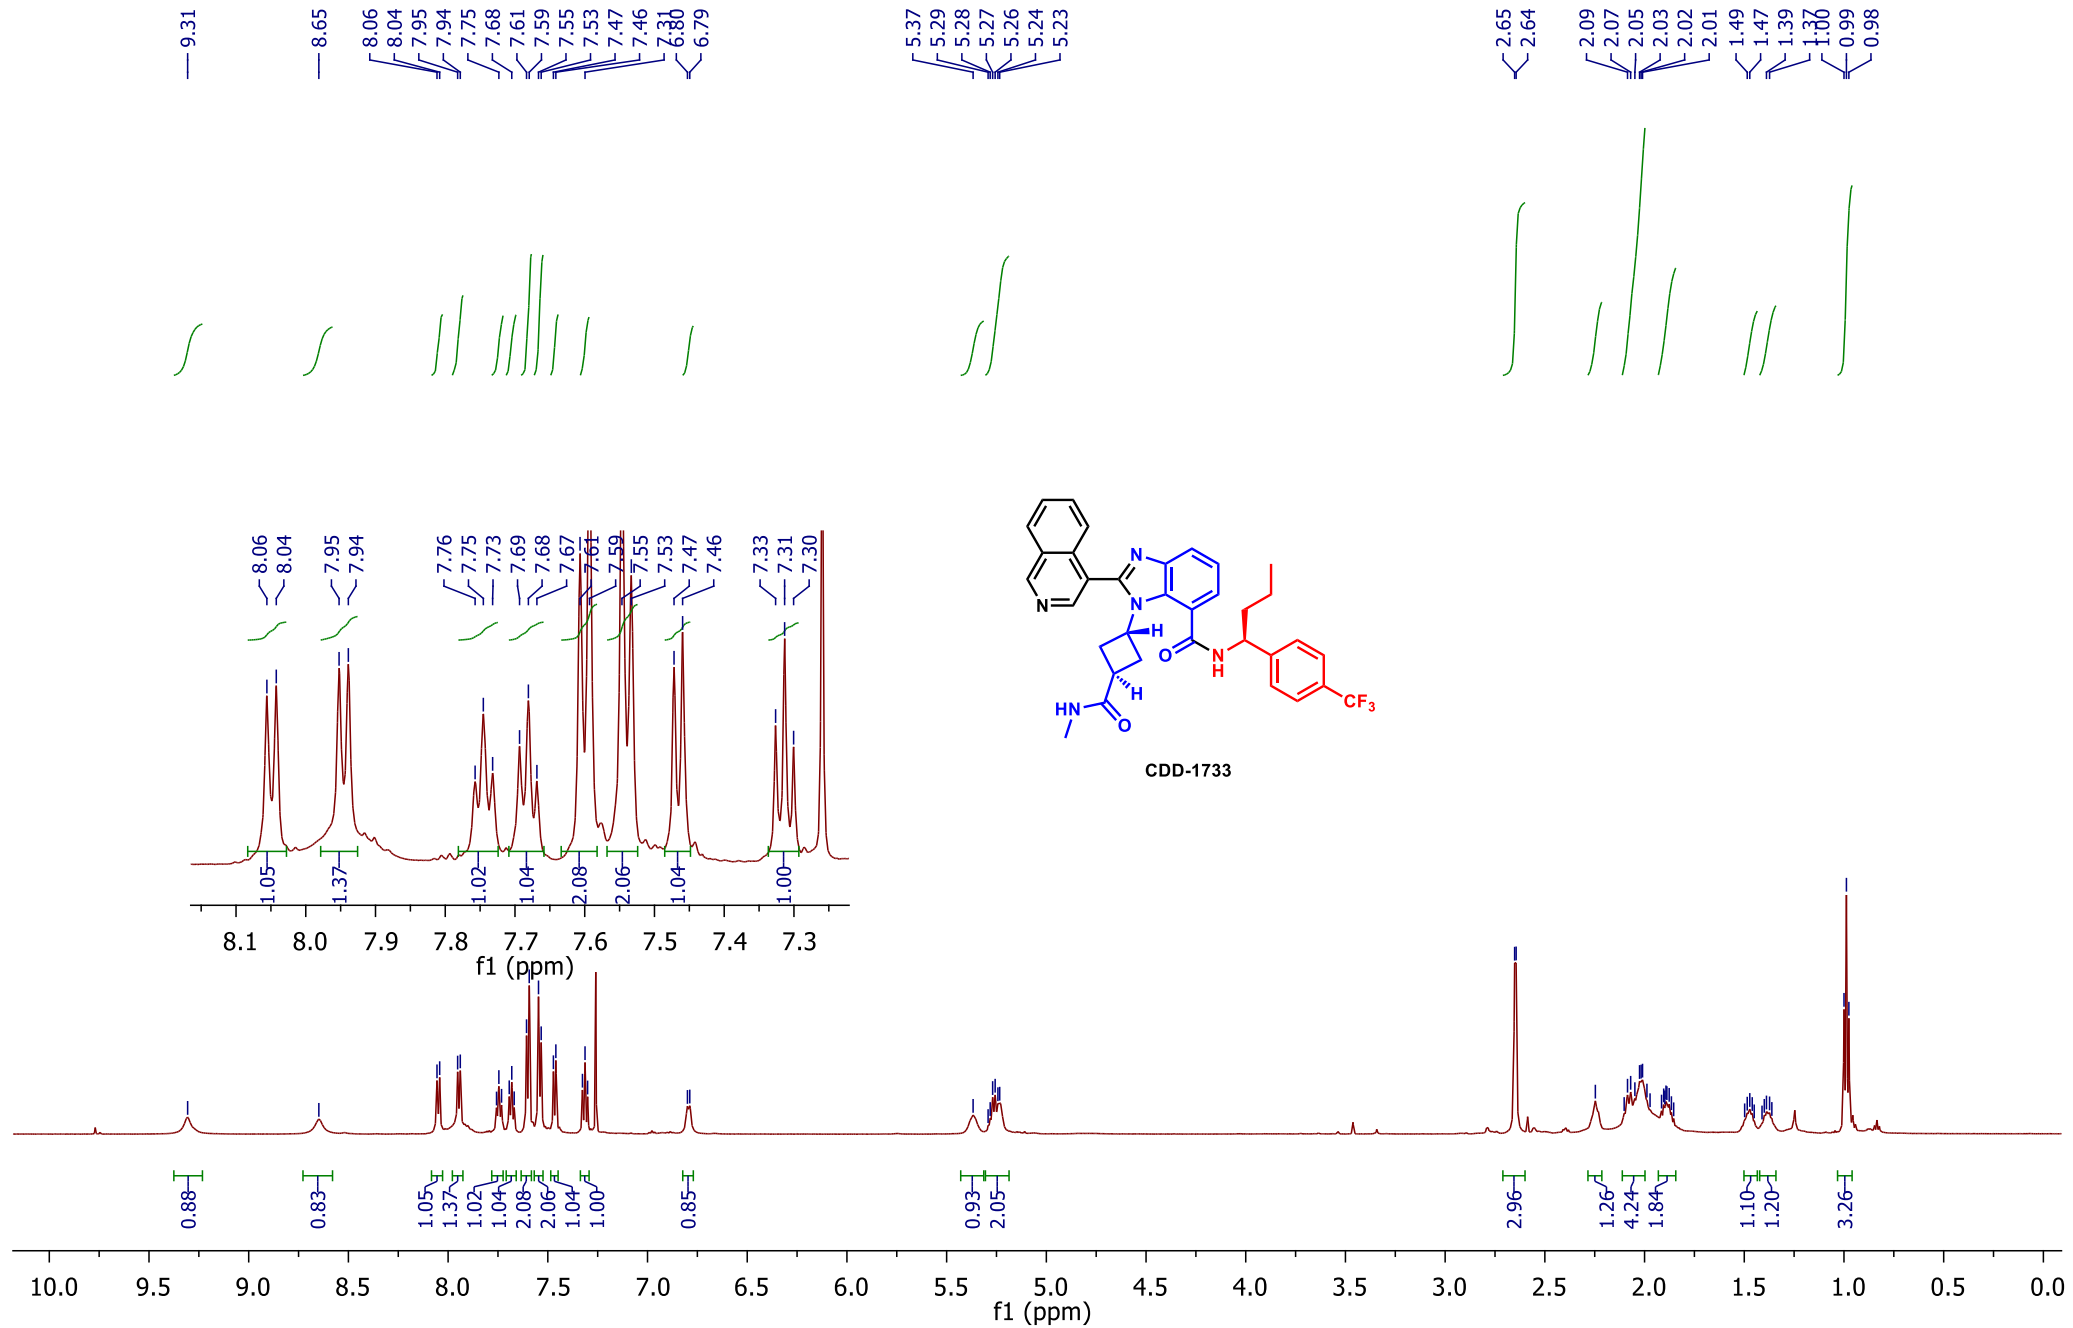

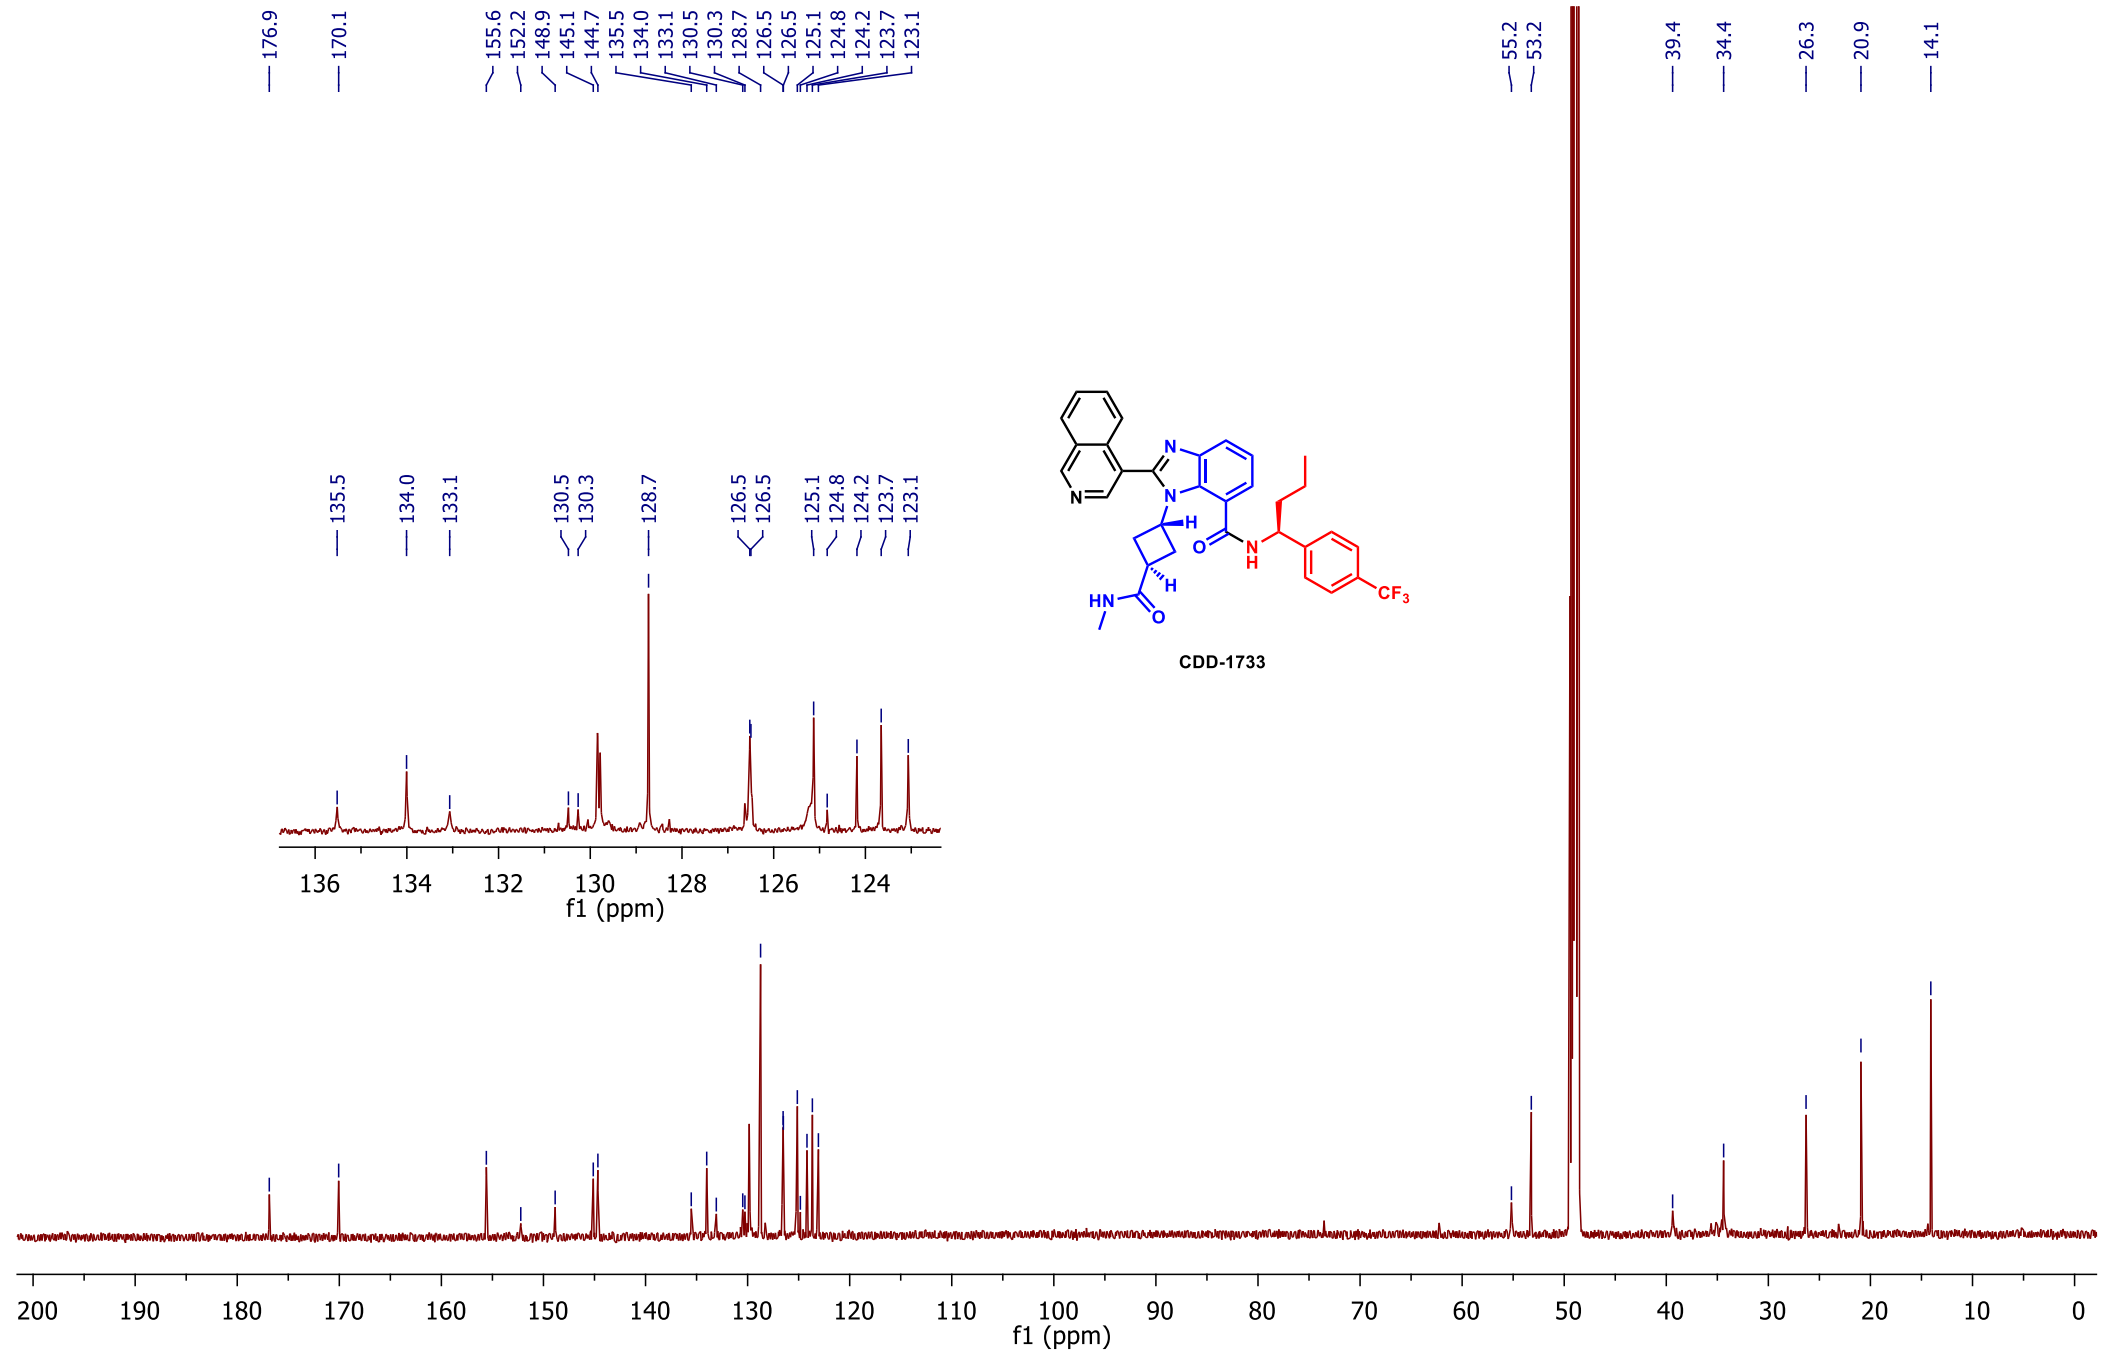

RT: 0.00 - 7.00 SM: 7B

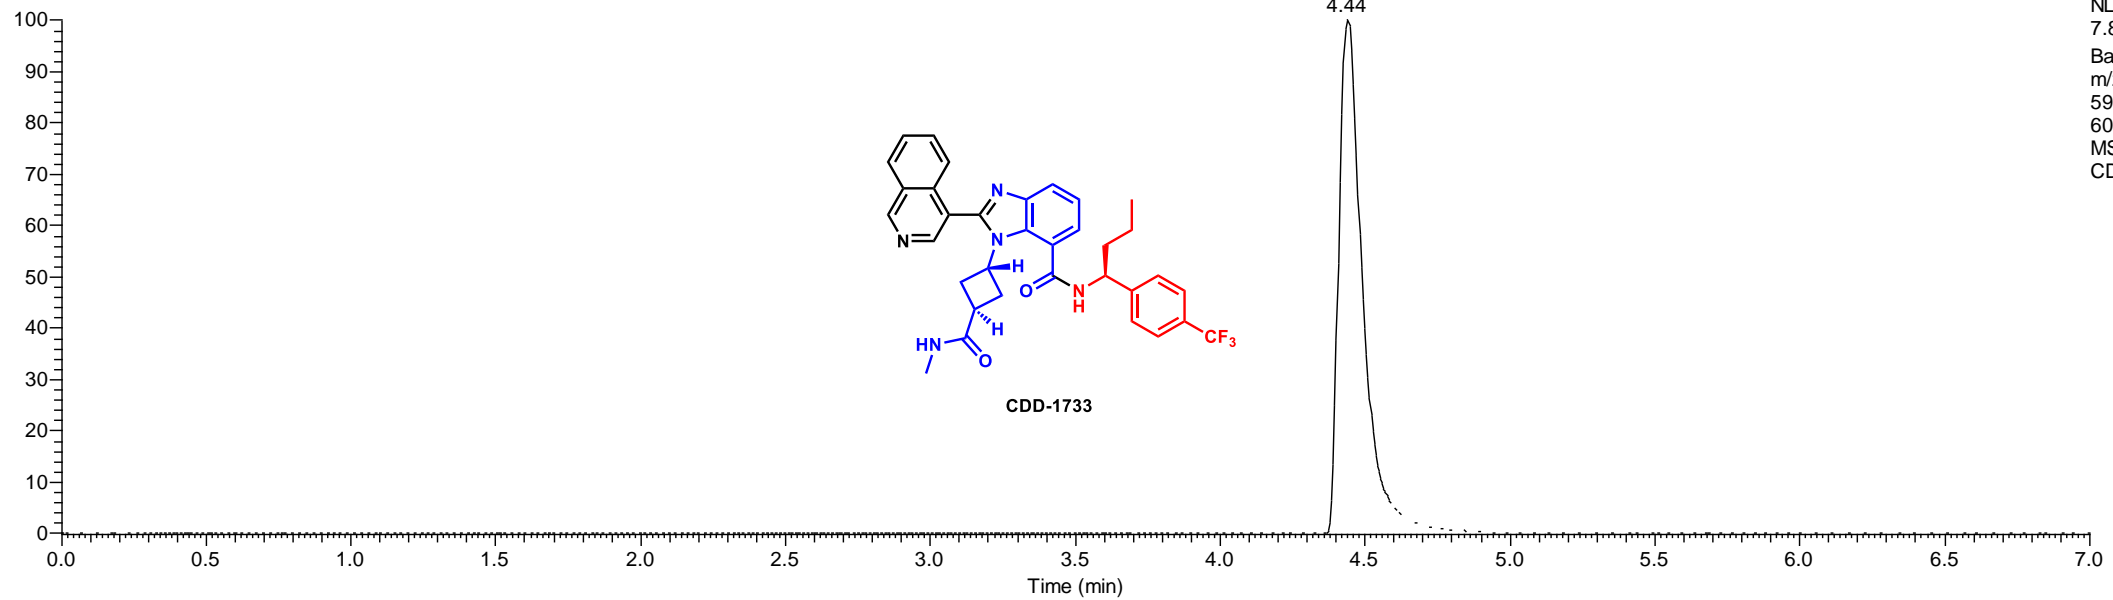

NL:  
7.86E9  
Base Peak  
m/z=  
599.7580-  
600.7580  
MS  
CDD1733

CDD1733 #660 RT: 4.44 AV: 1 NL: 8.21E9  
T: FTMS + p ESI Full ms [100.0000-1000.0000]

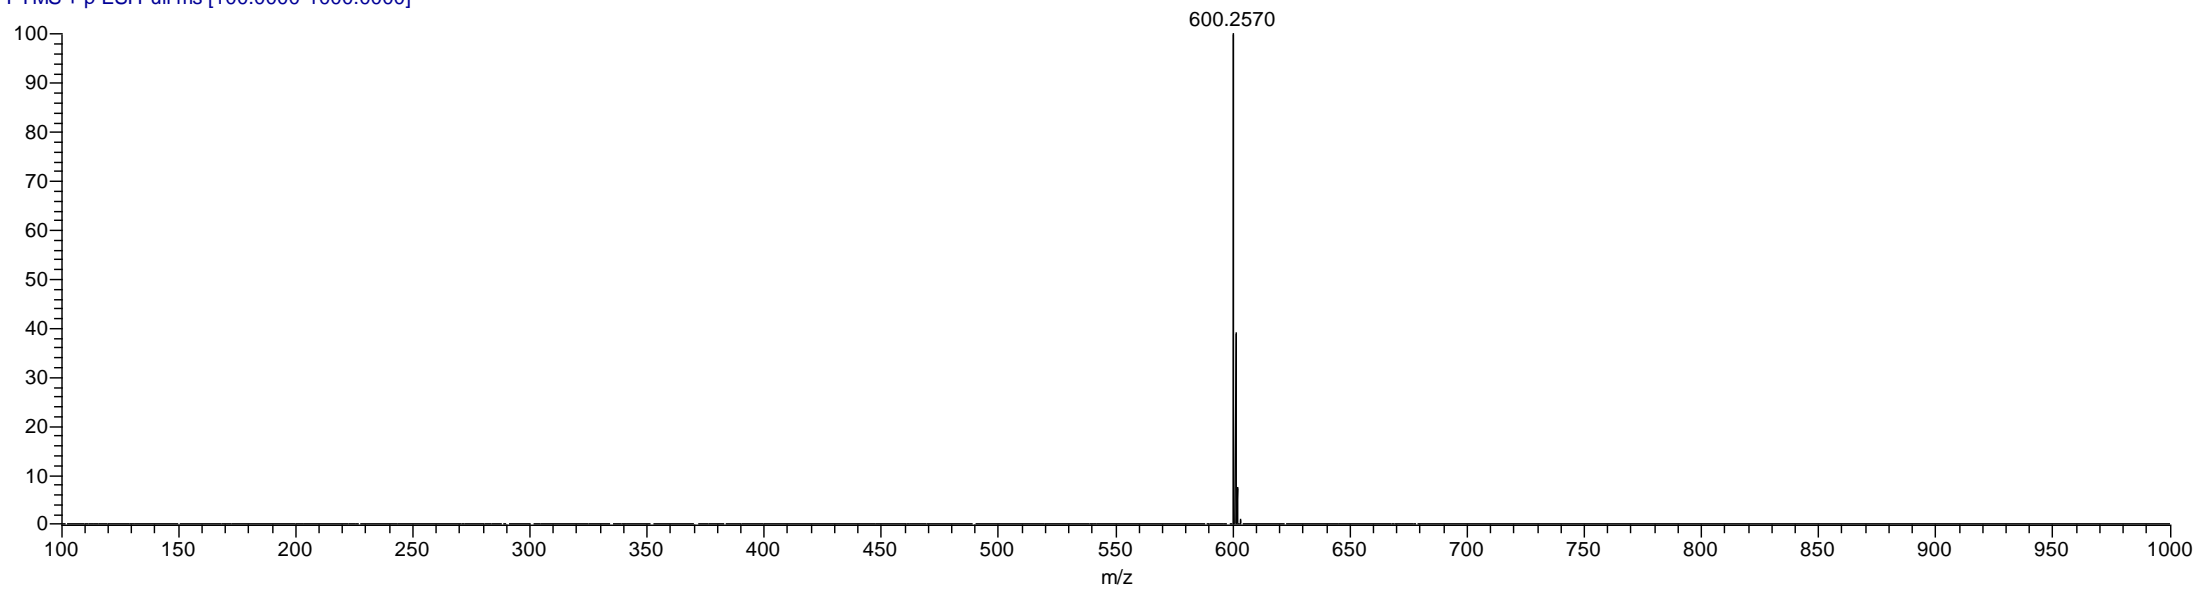

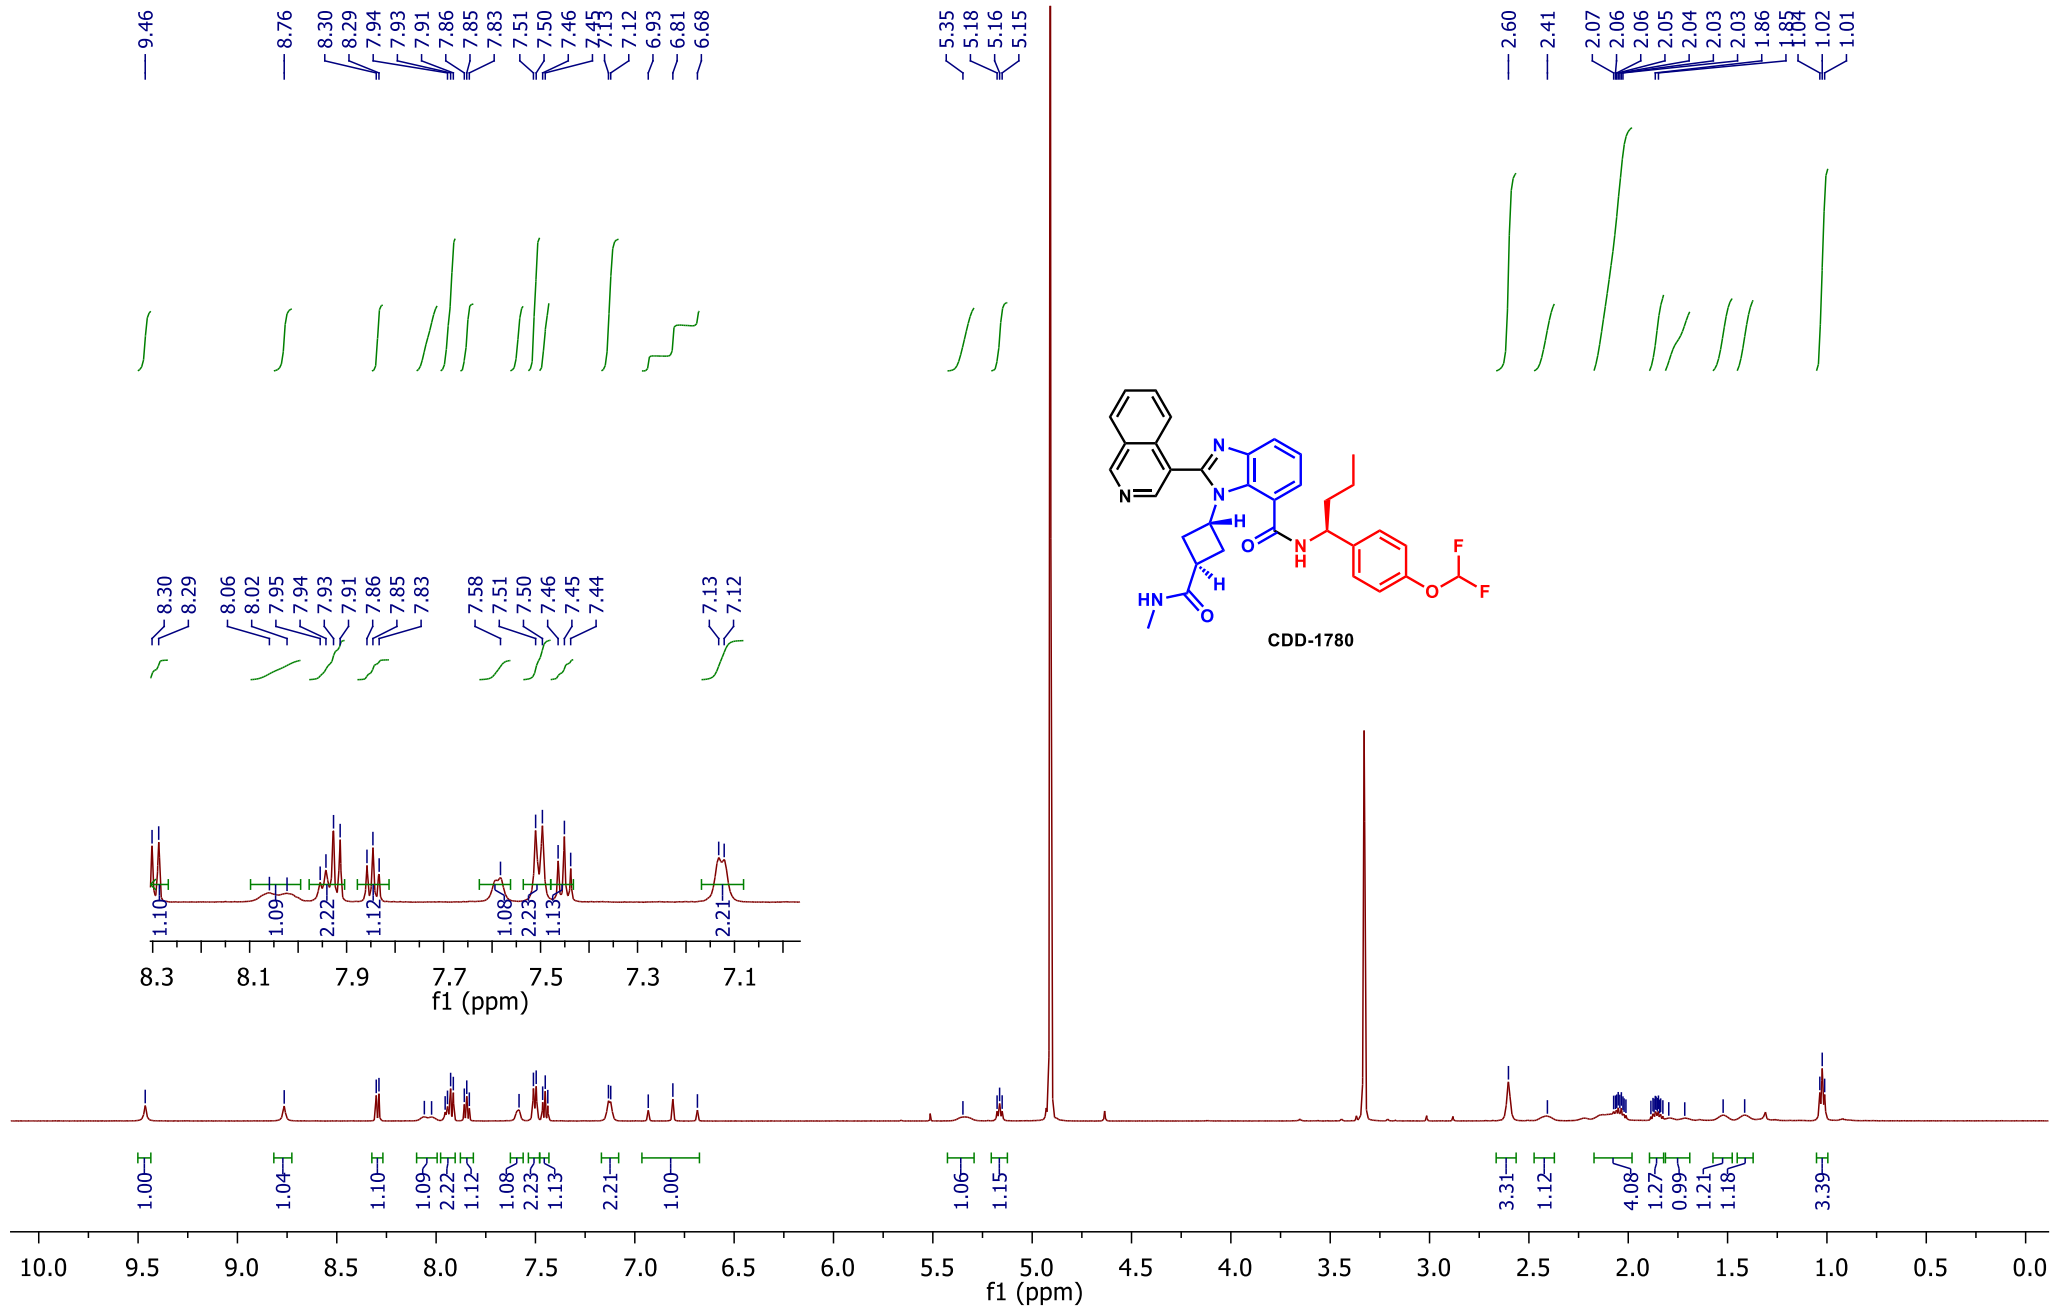

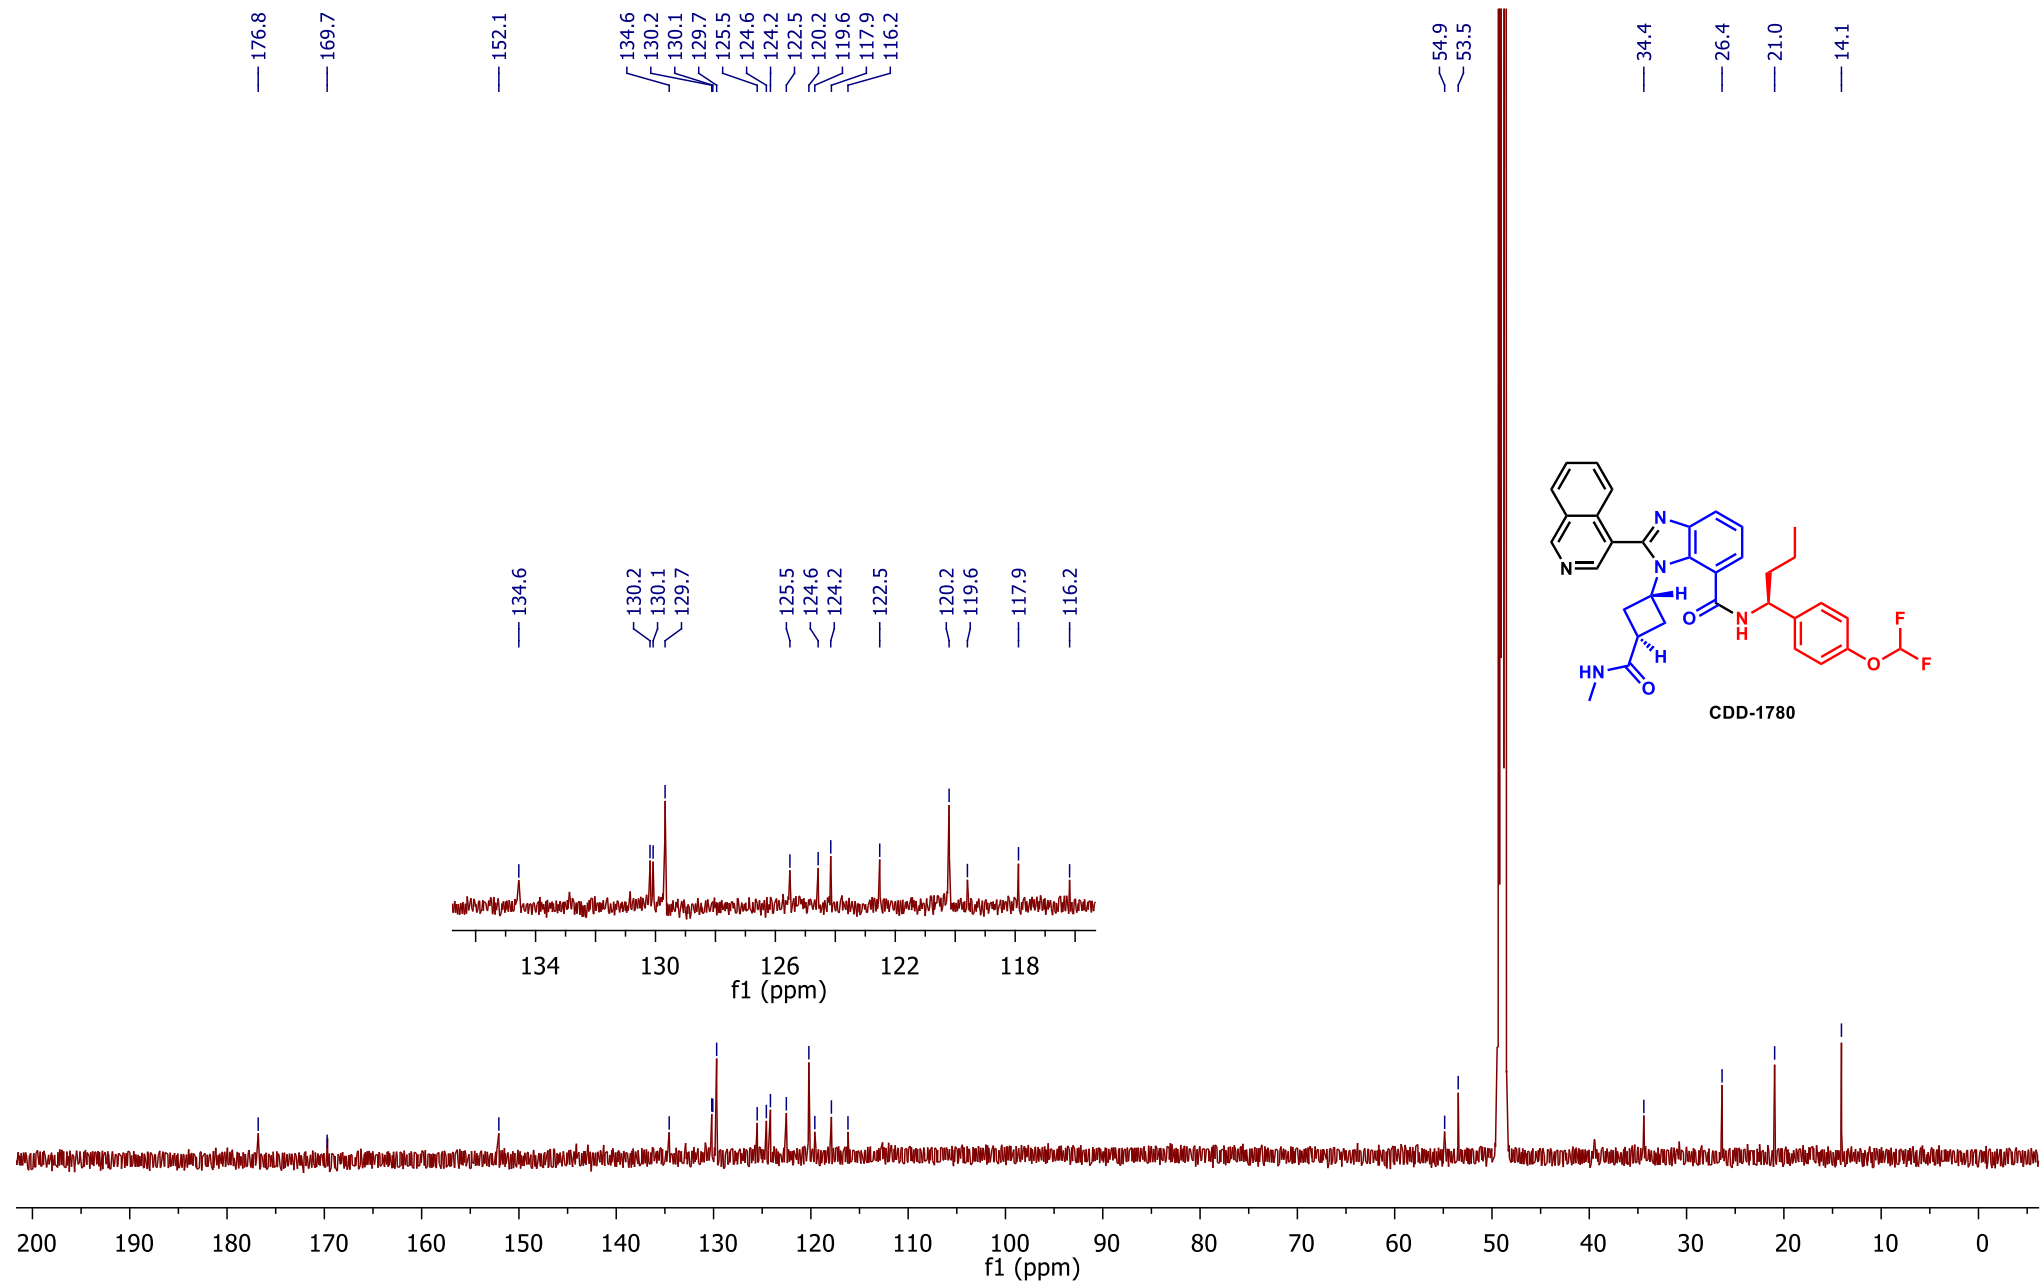

RT: 0.00 - 7.00 SM: 7B

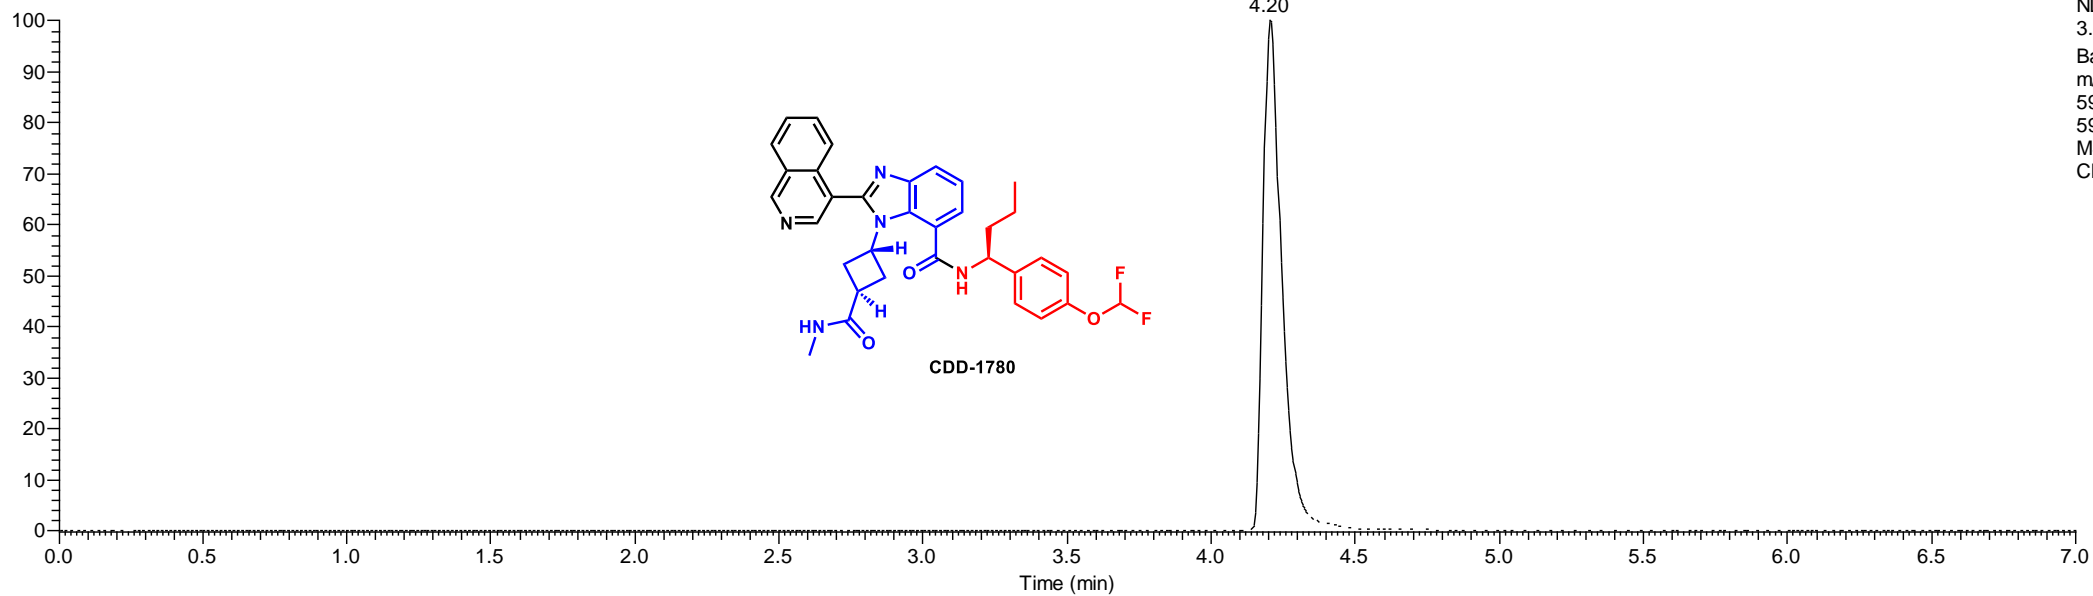

NL:  
3.25E9  
Base Peak  
m/z=  
597.7624-  
598.7624  
MS  
CDD1780

CDD1780 #572 RT: 4.20 AV: 1 NL: 3.46E9  
T: FTMS + p ESI Full ms [100.0000-1000.0000]

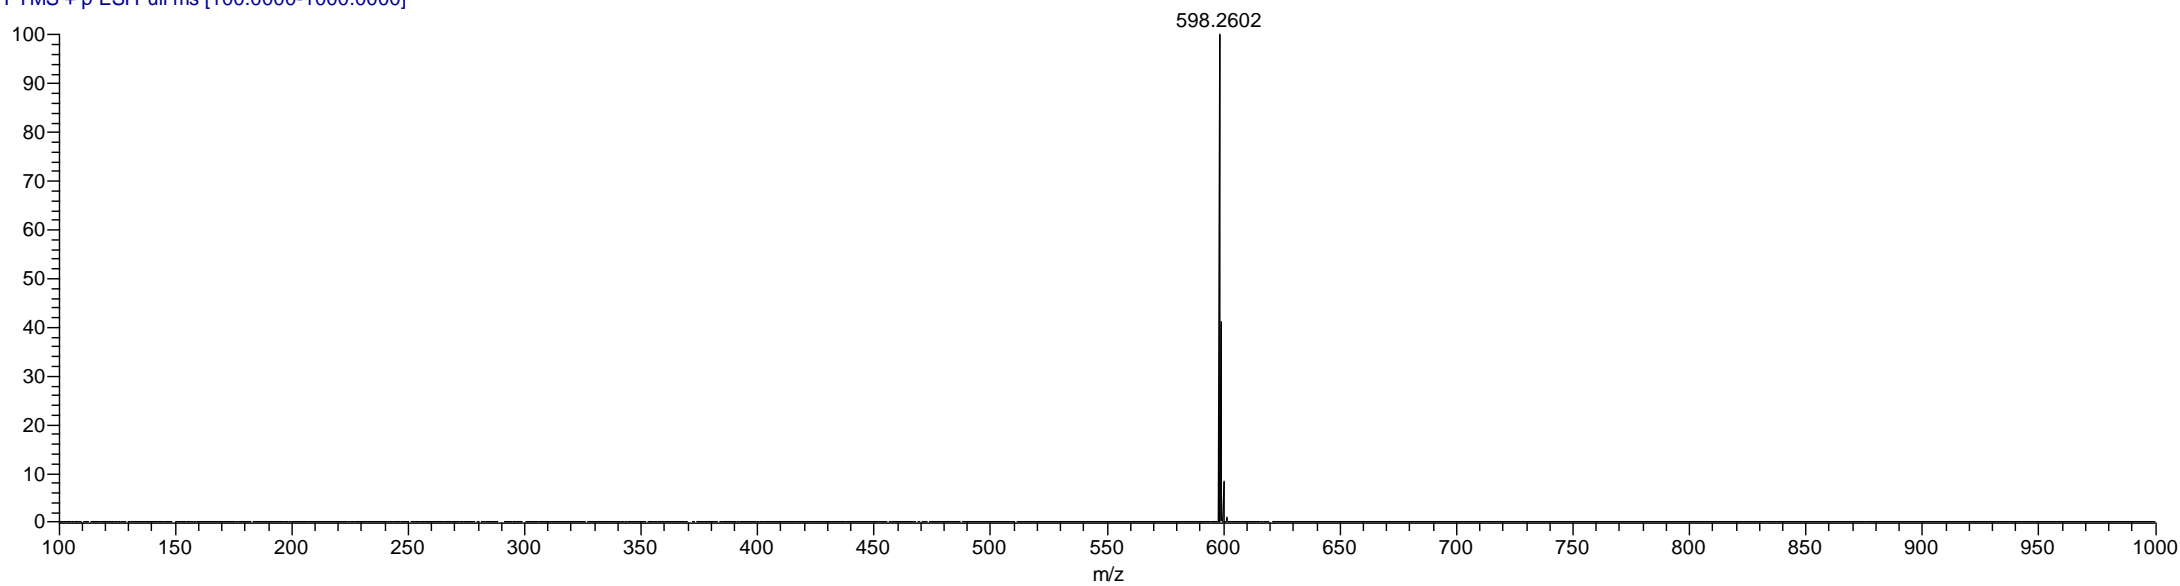

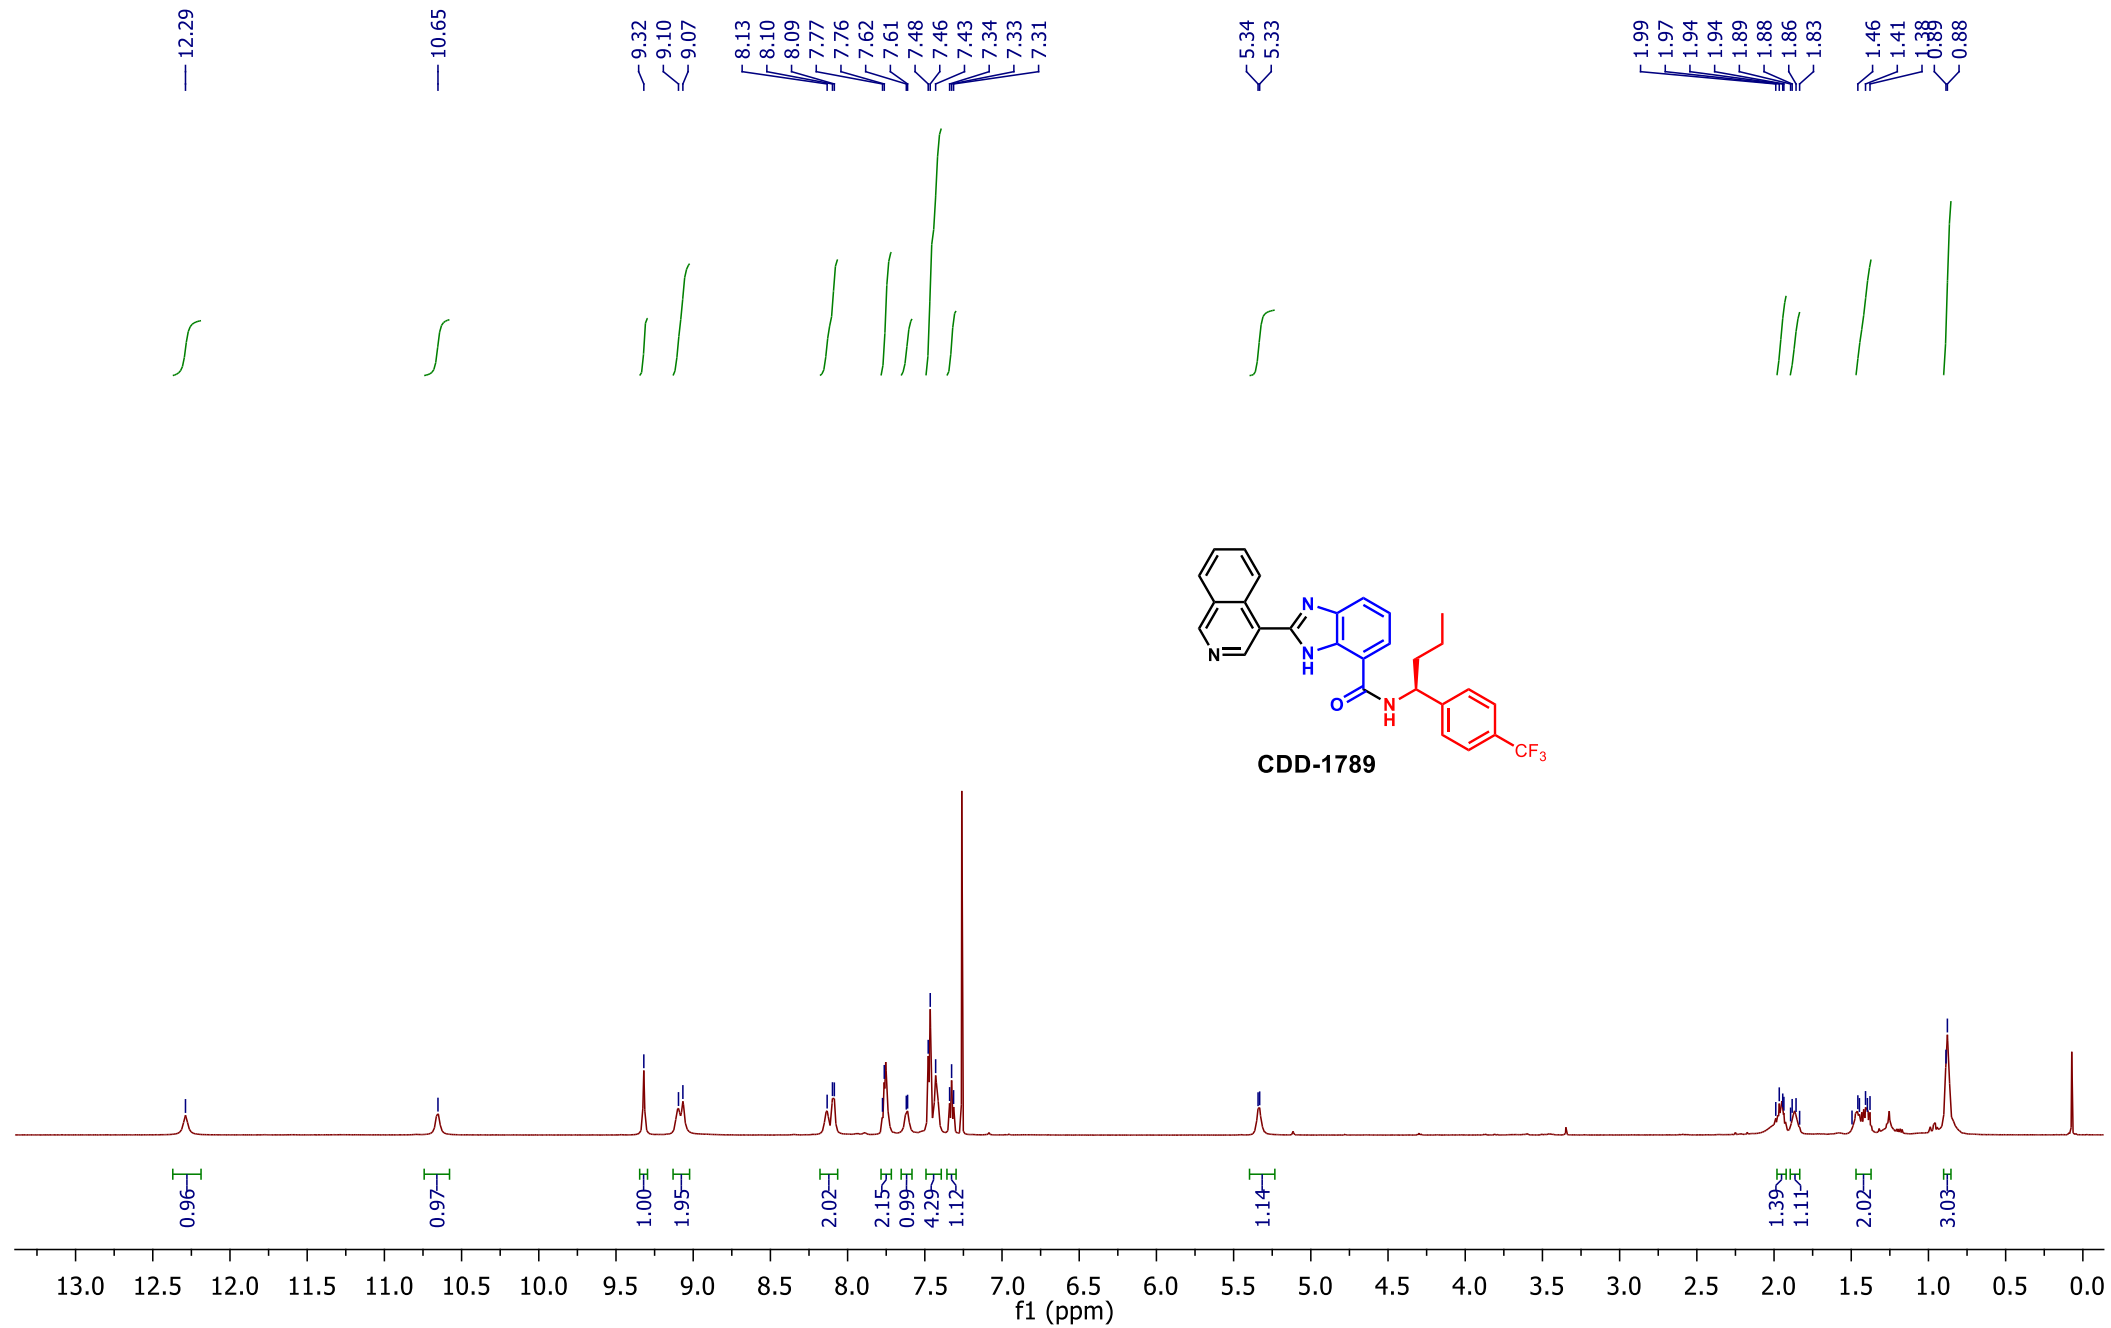



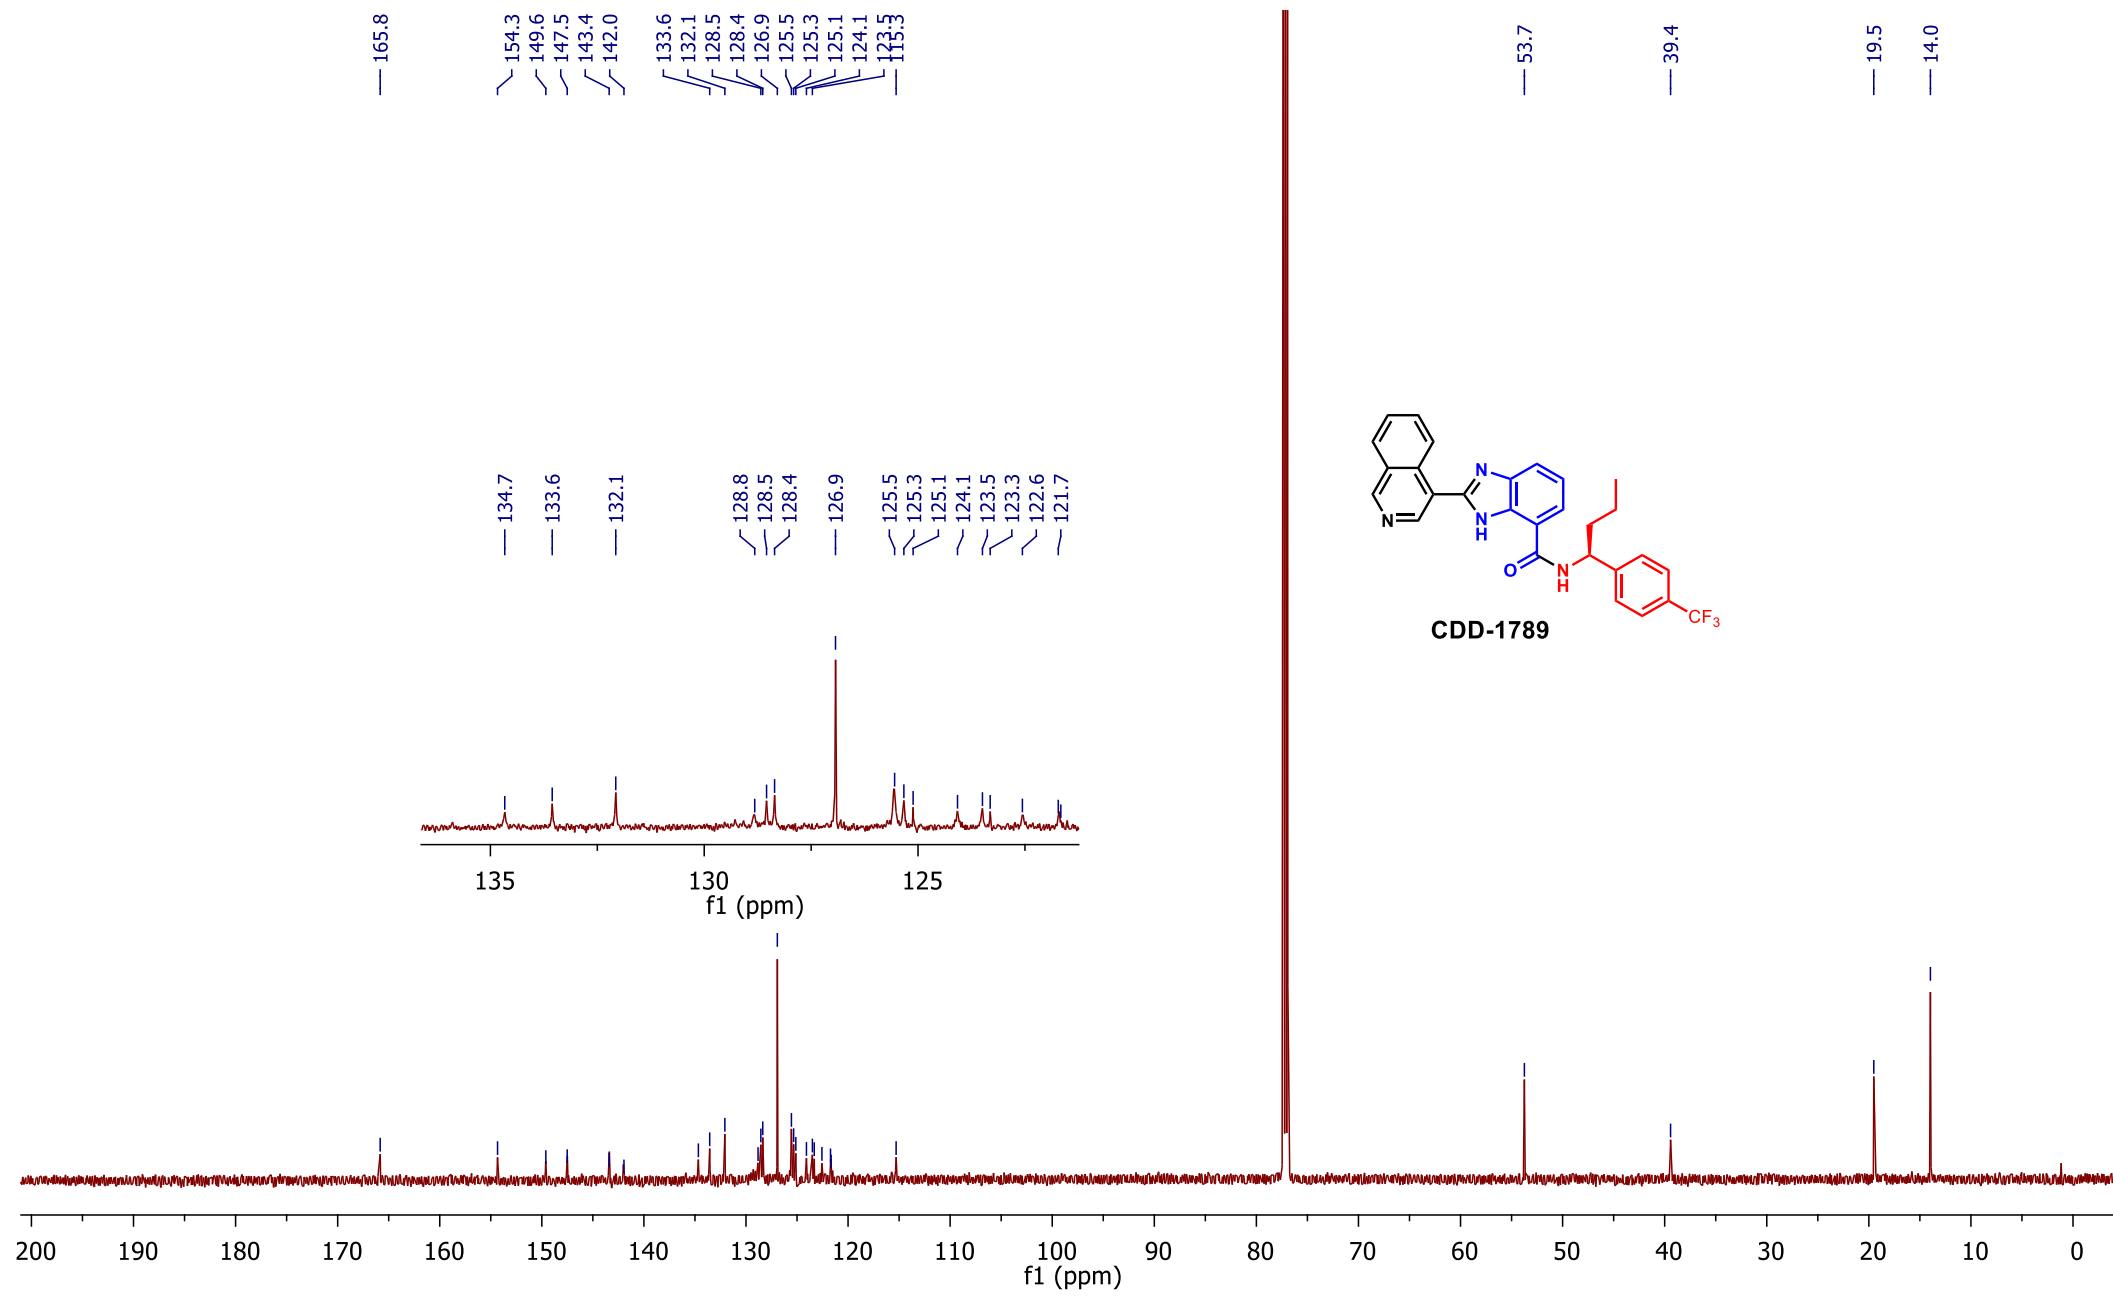

RT: 0.00 - 7.01 SM: 7B

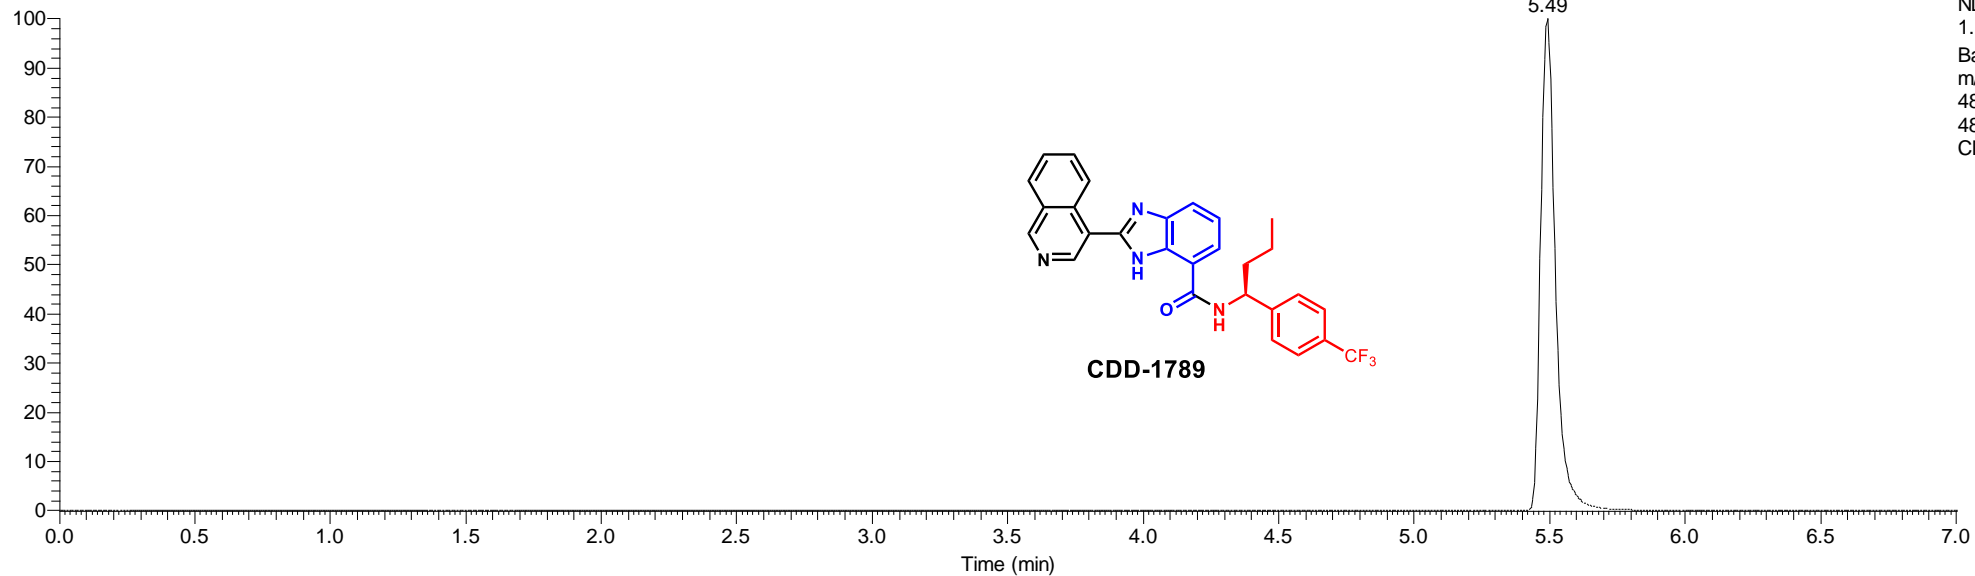

NL:  
1.17E9  
Base Peak  
m/z=  
488.68-  
489.68 MS  
CDD1789

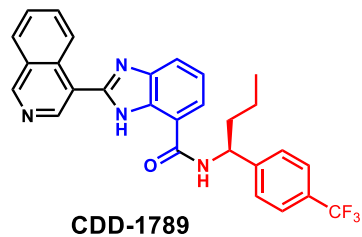

CDD1789 #744 RT: 5.49 AV: 1 NL: 1.28E9  
T: FTMS + p ESI Full ms [100.0000-1000.0000]

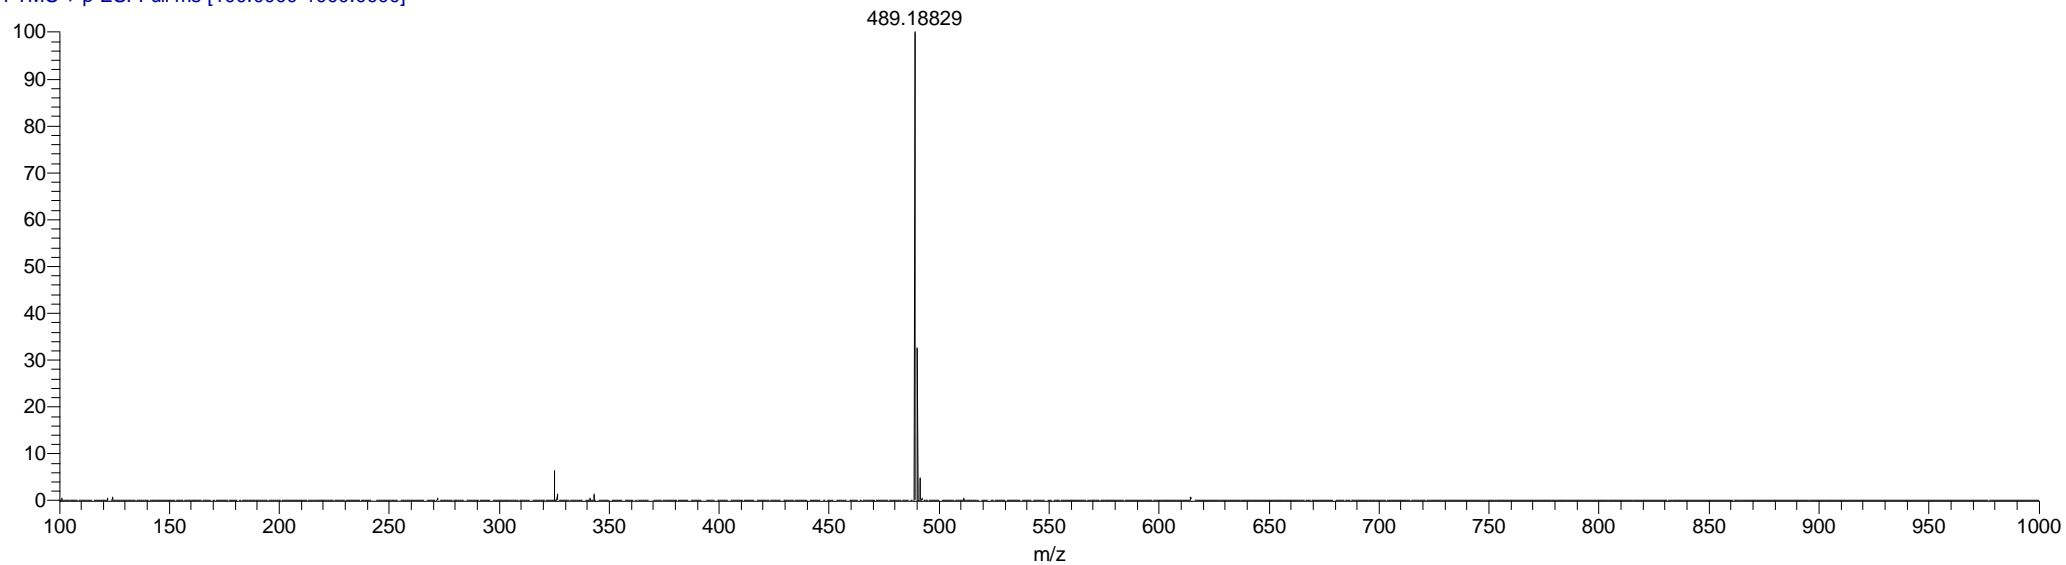

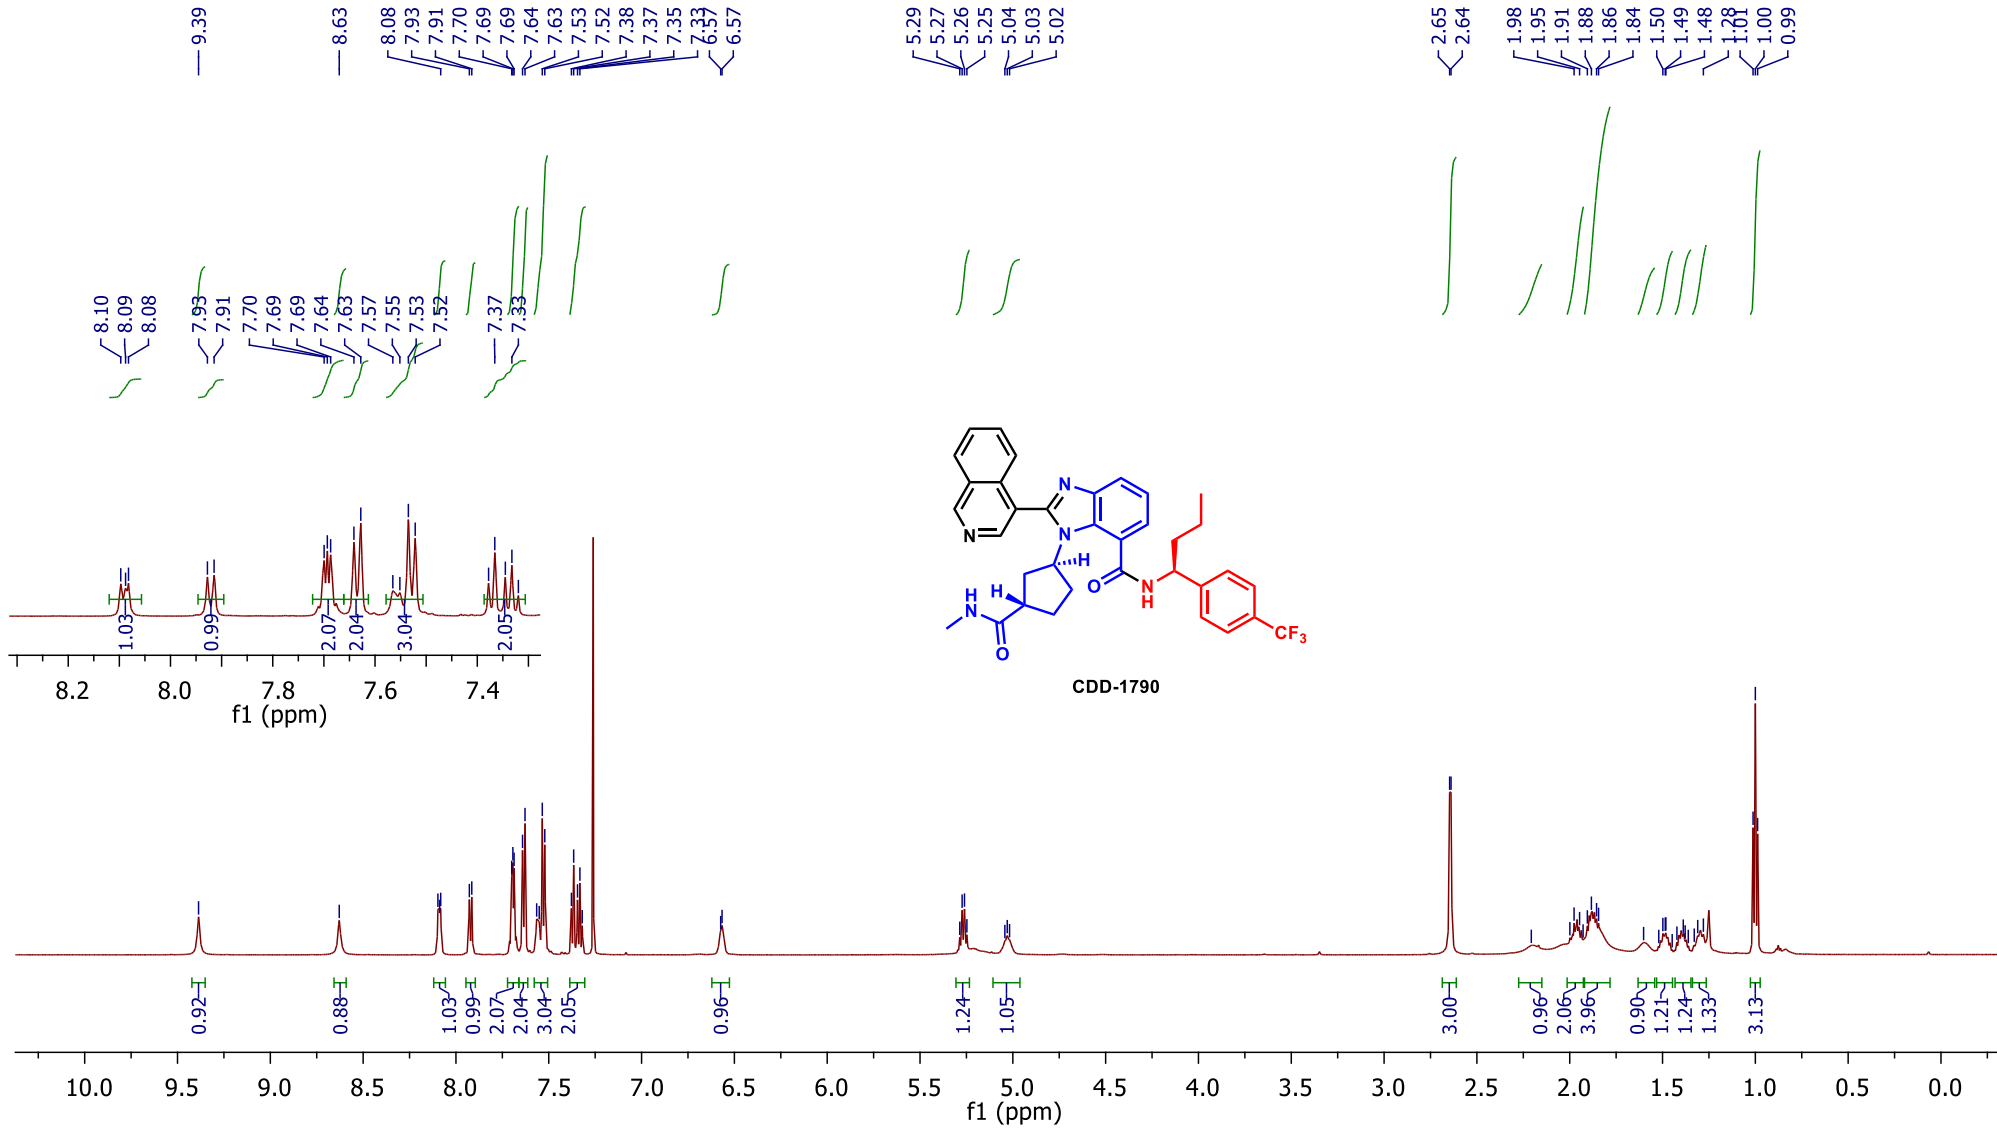

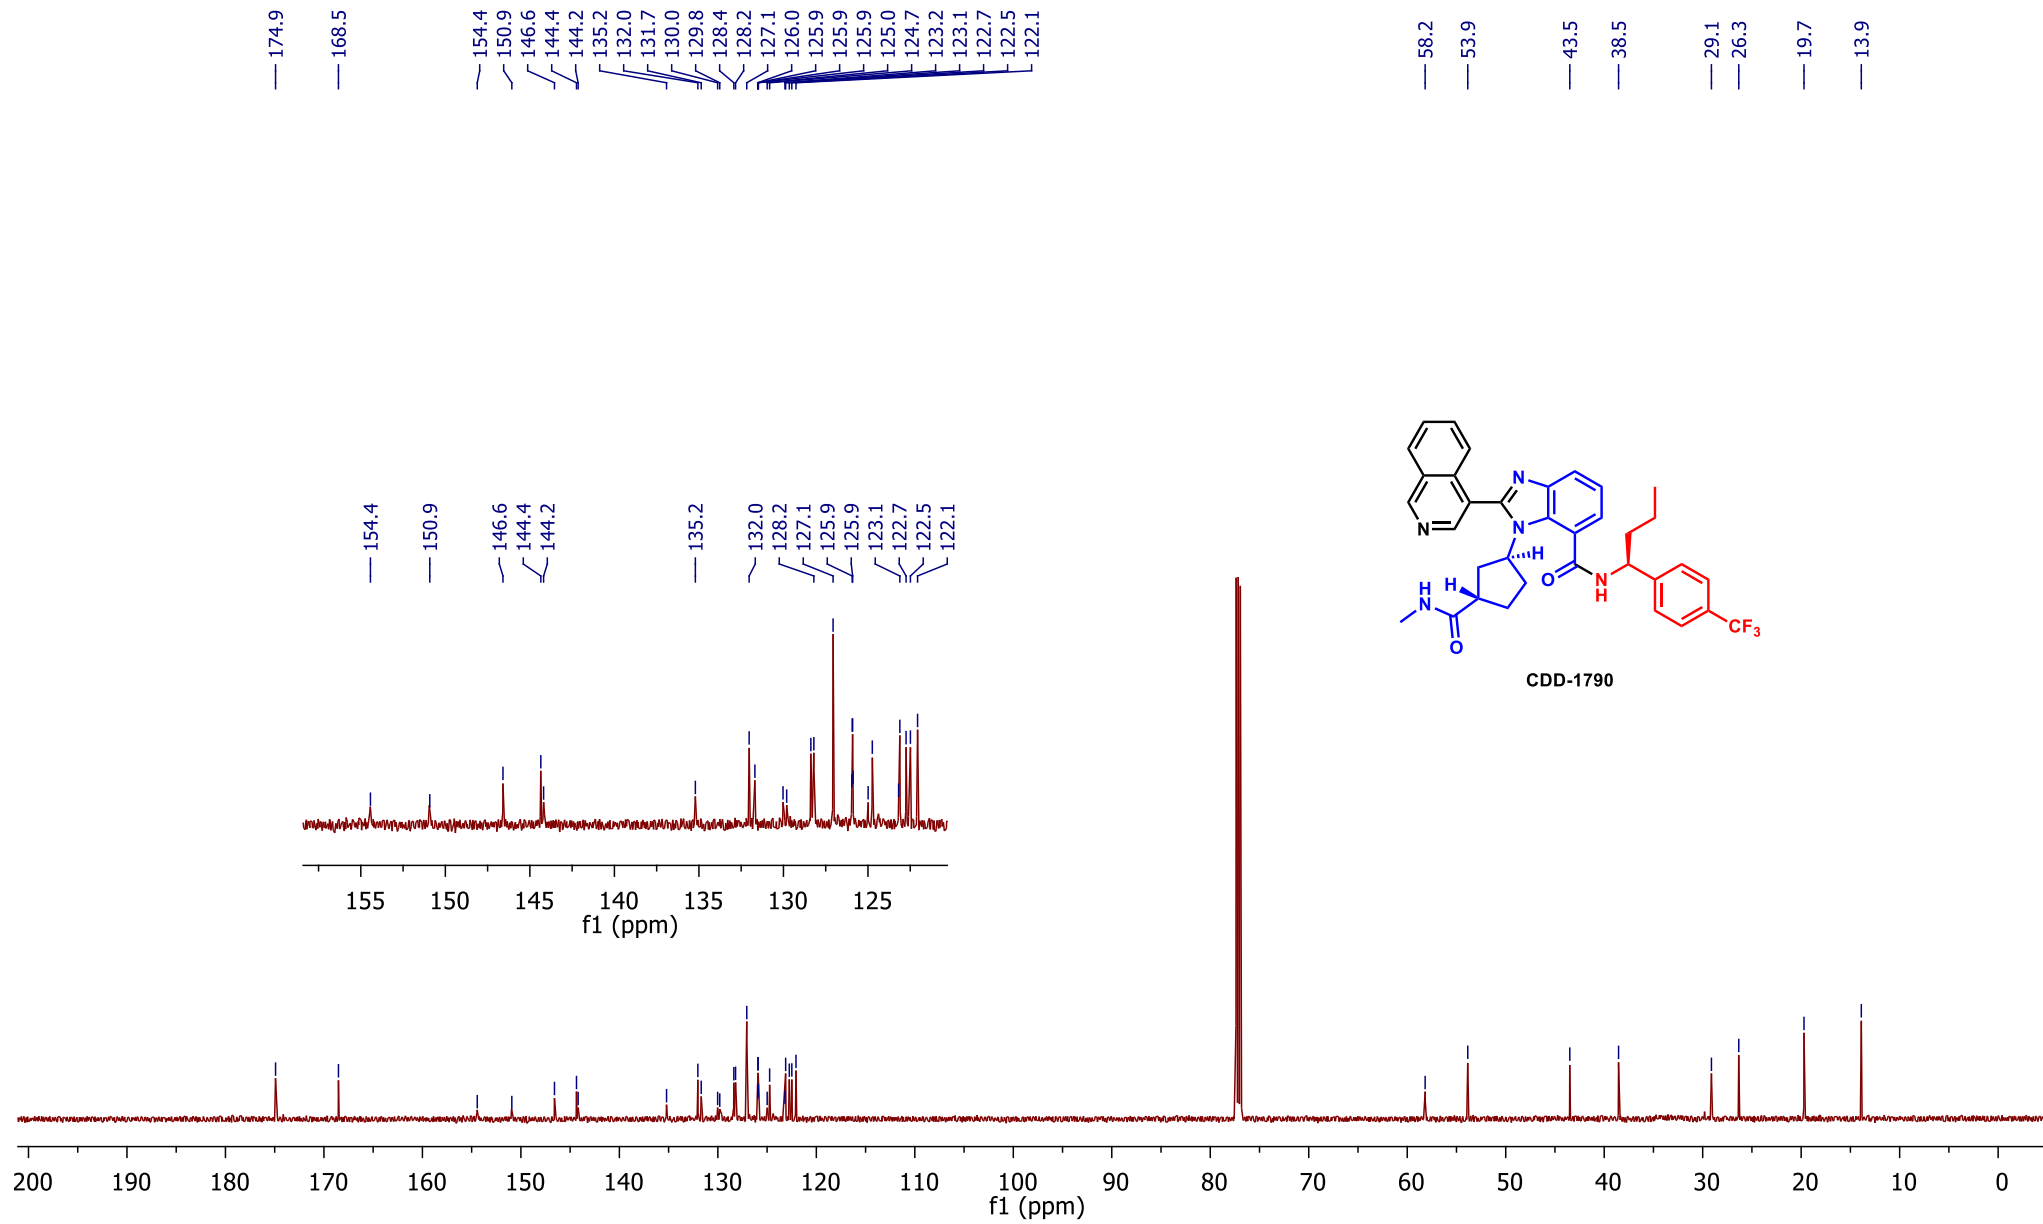

RT: 0.00 - 7.00 SM: 7B

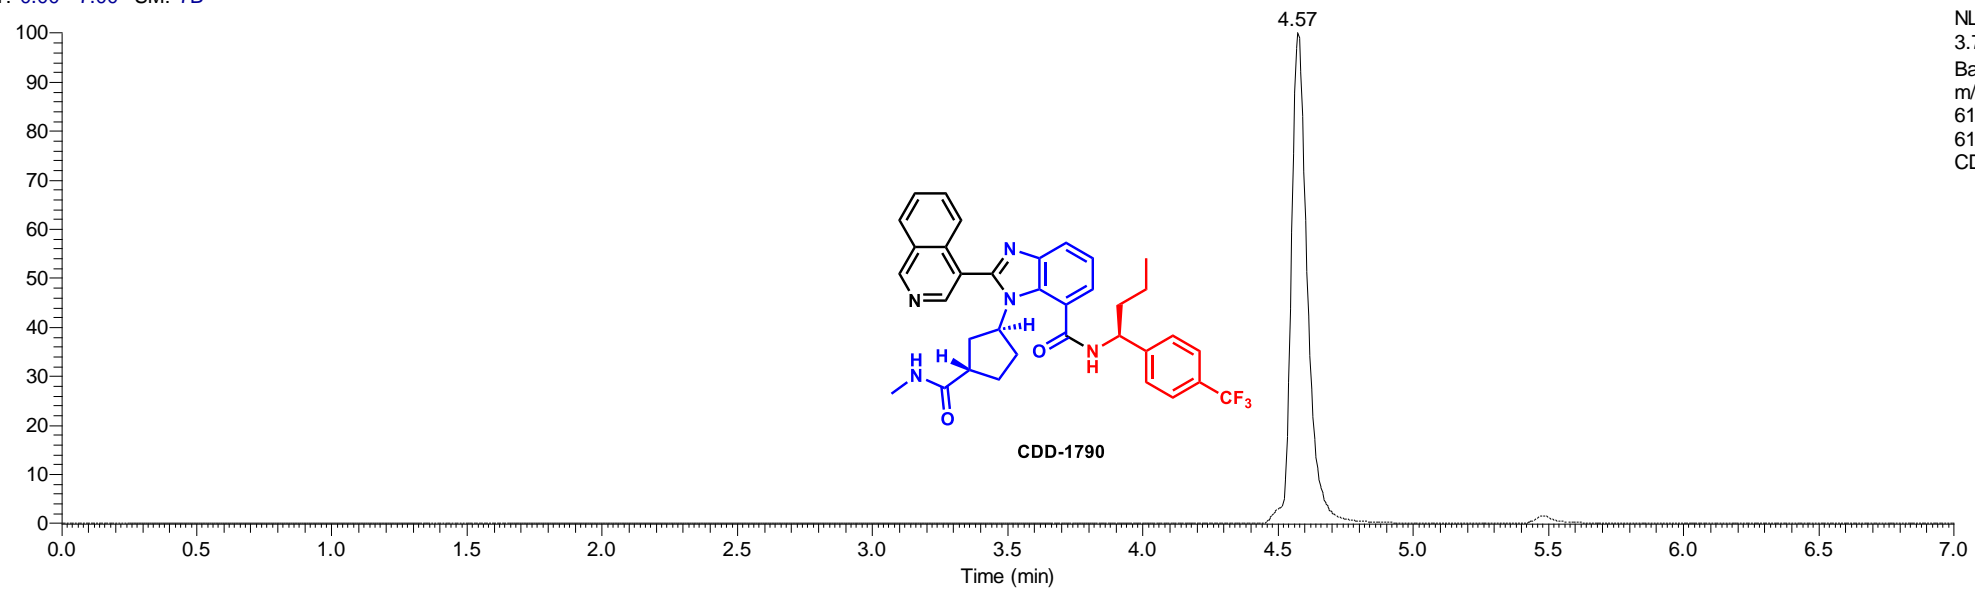

NL:  
3.75E8  
Base Peak  
m/z=  
613.77-  
614.77 MS  
CDD1790

CDD1790 #586 RT: 4.57 AV: 1 NL: 4.30E8  
T: FTMS + p ESI Full ms [100.0000-1000.0000]

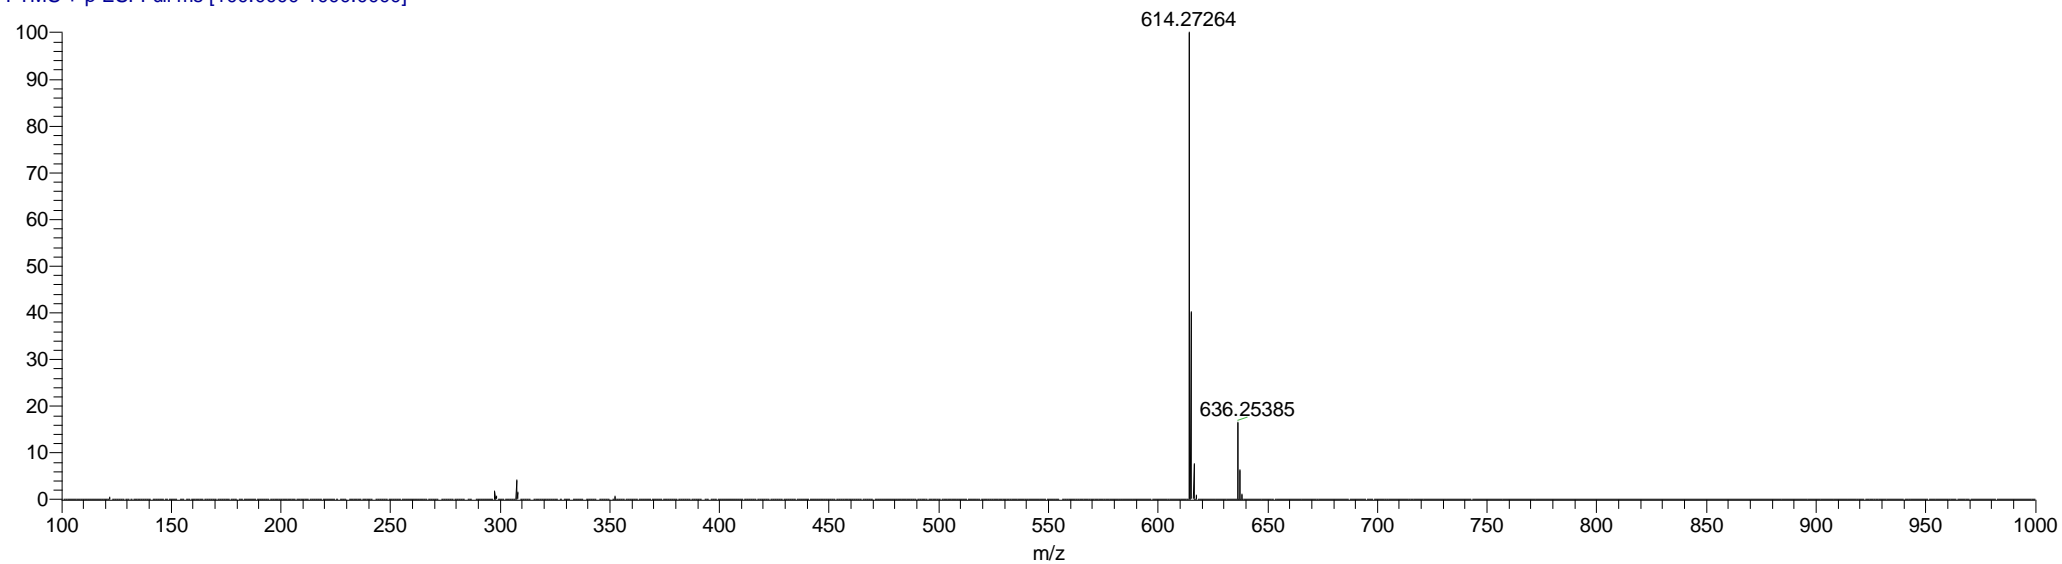

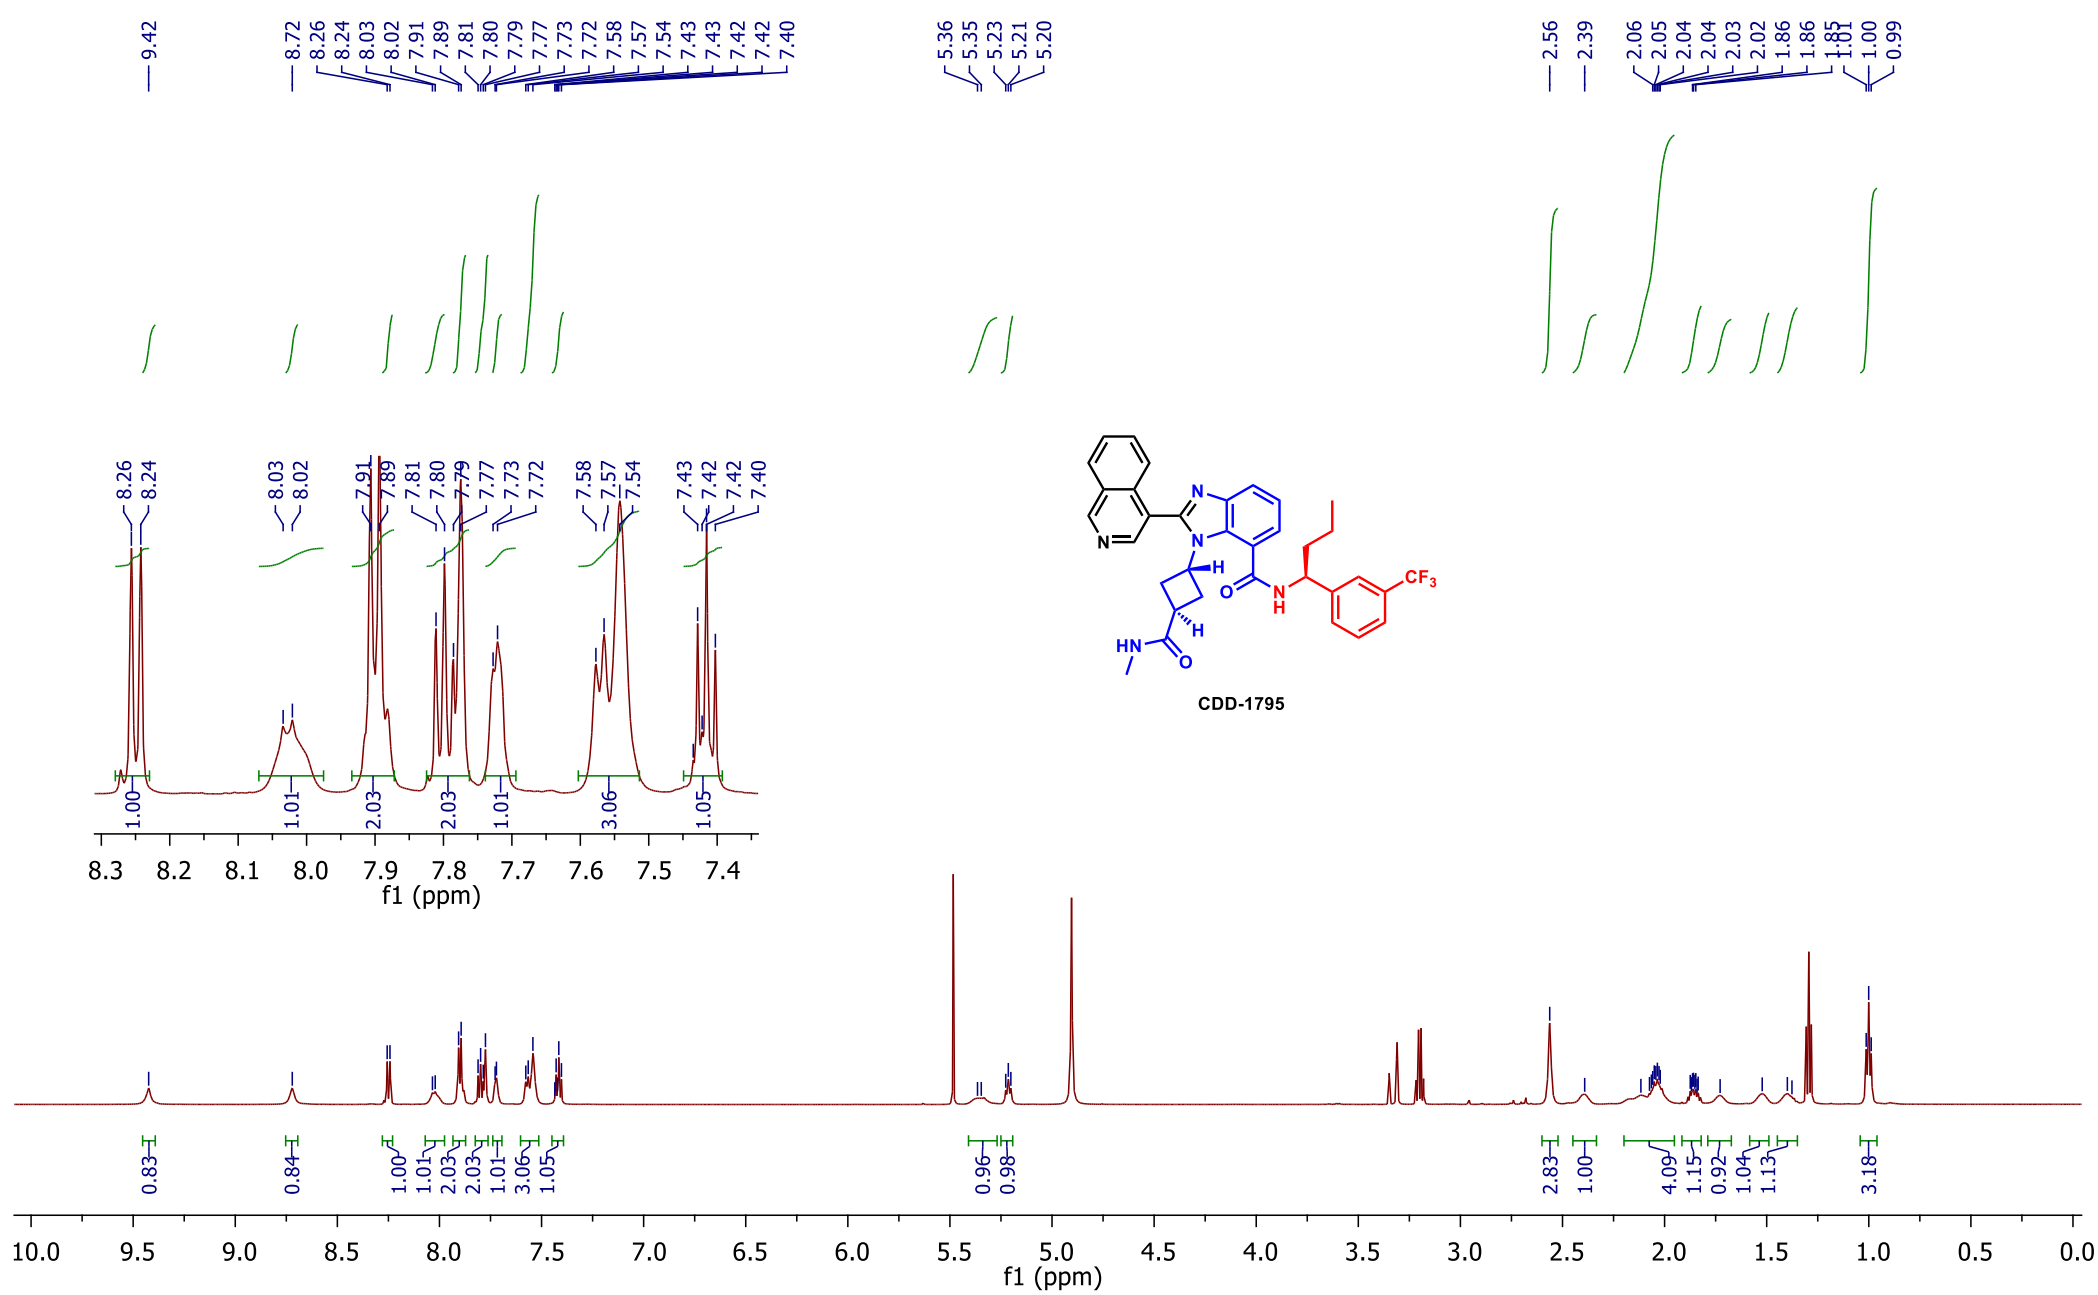

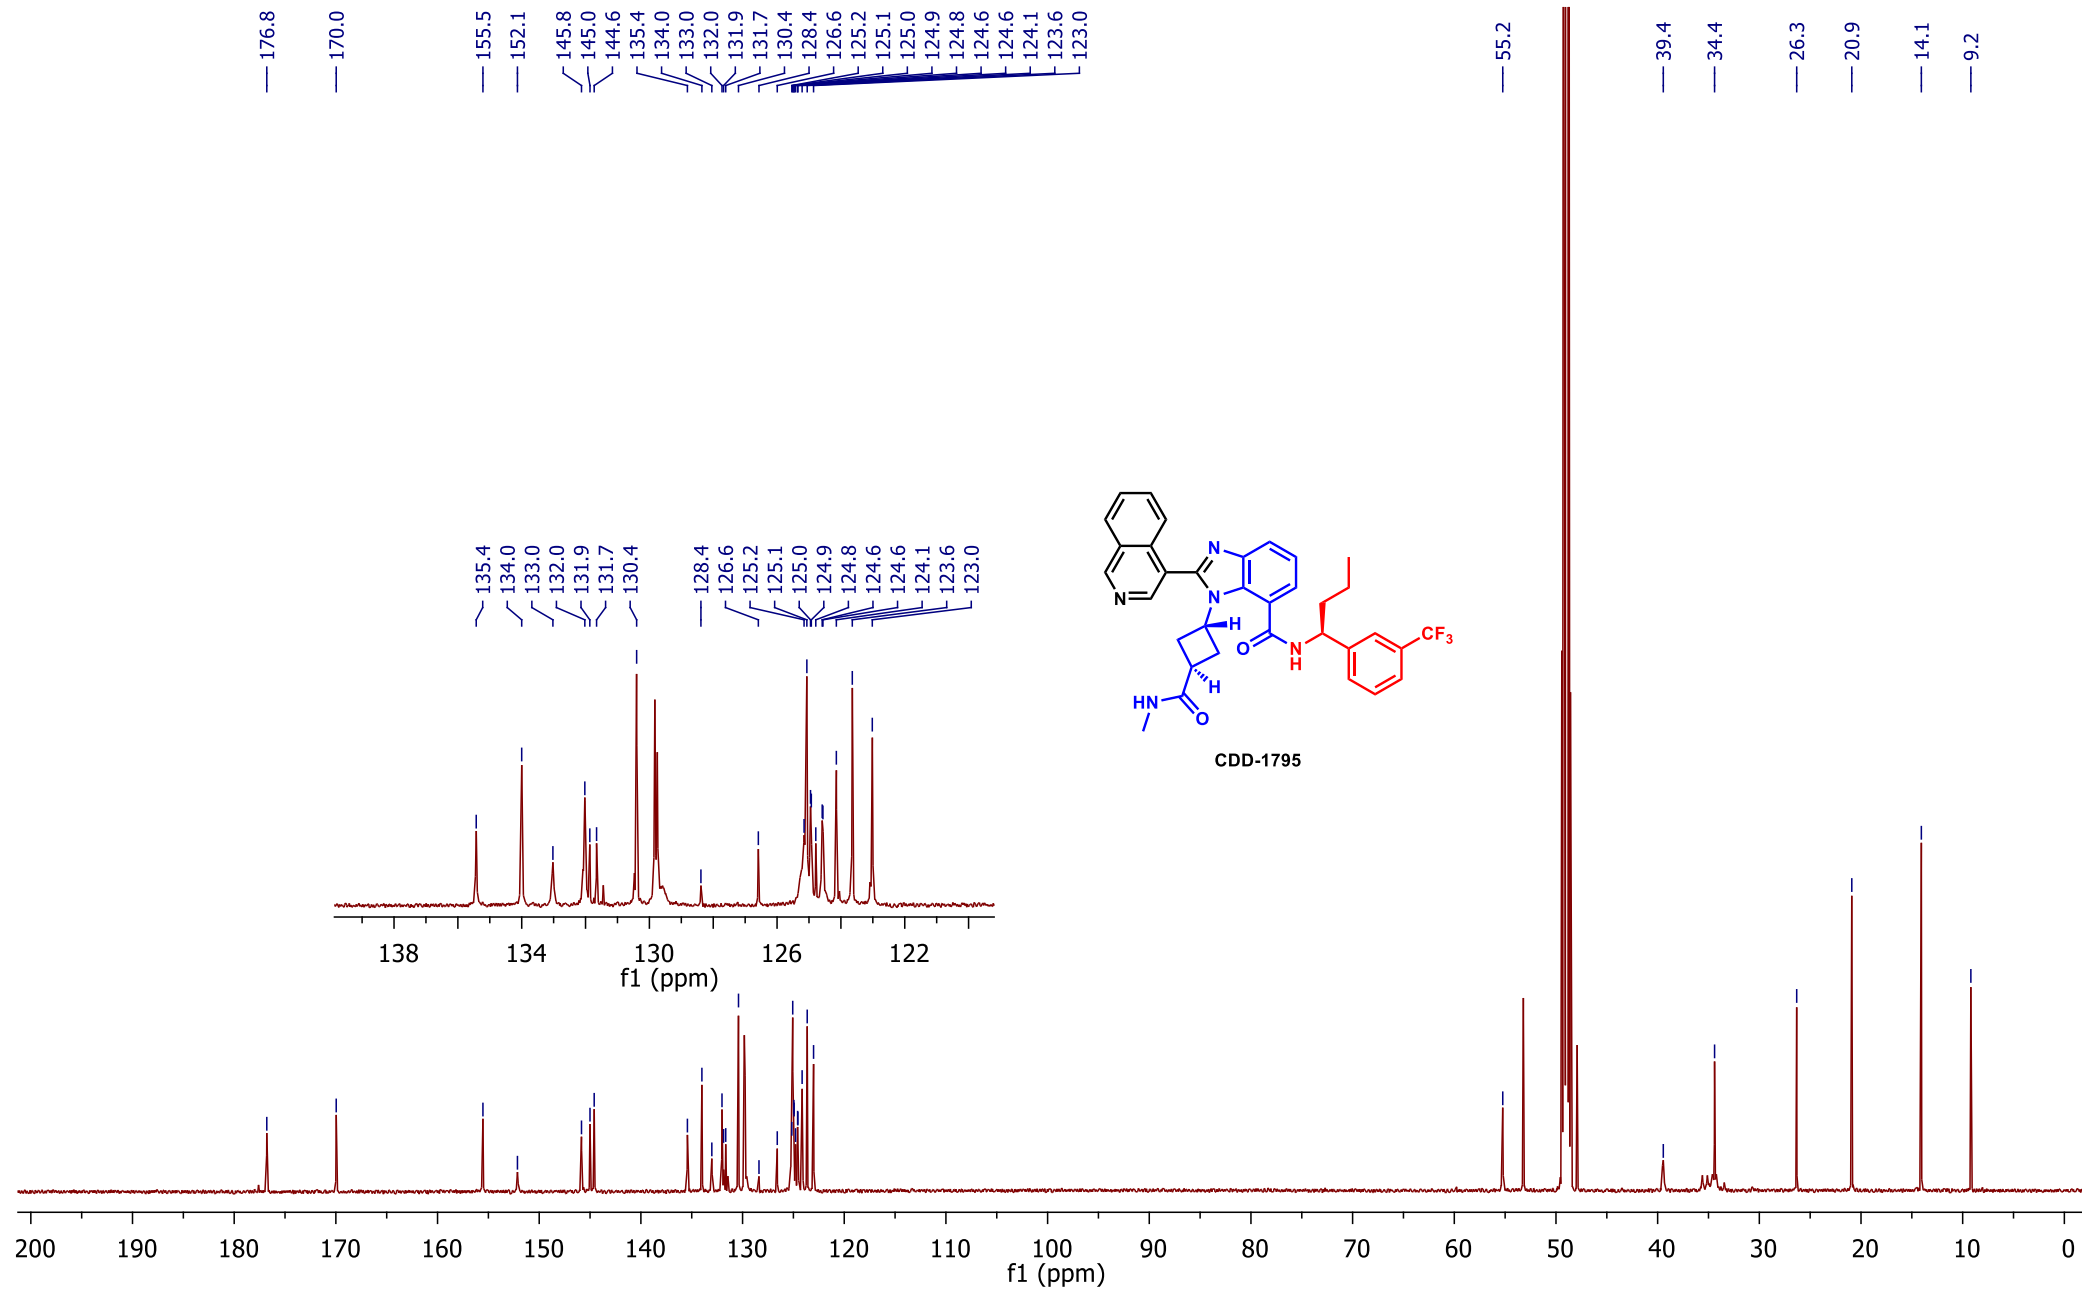

RT: 0.00 - 7.00 SM: 7B

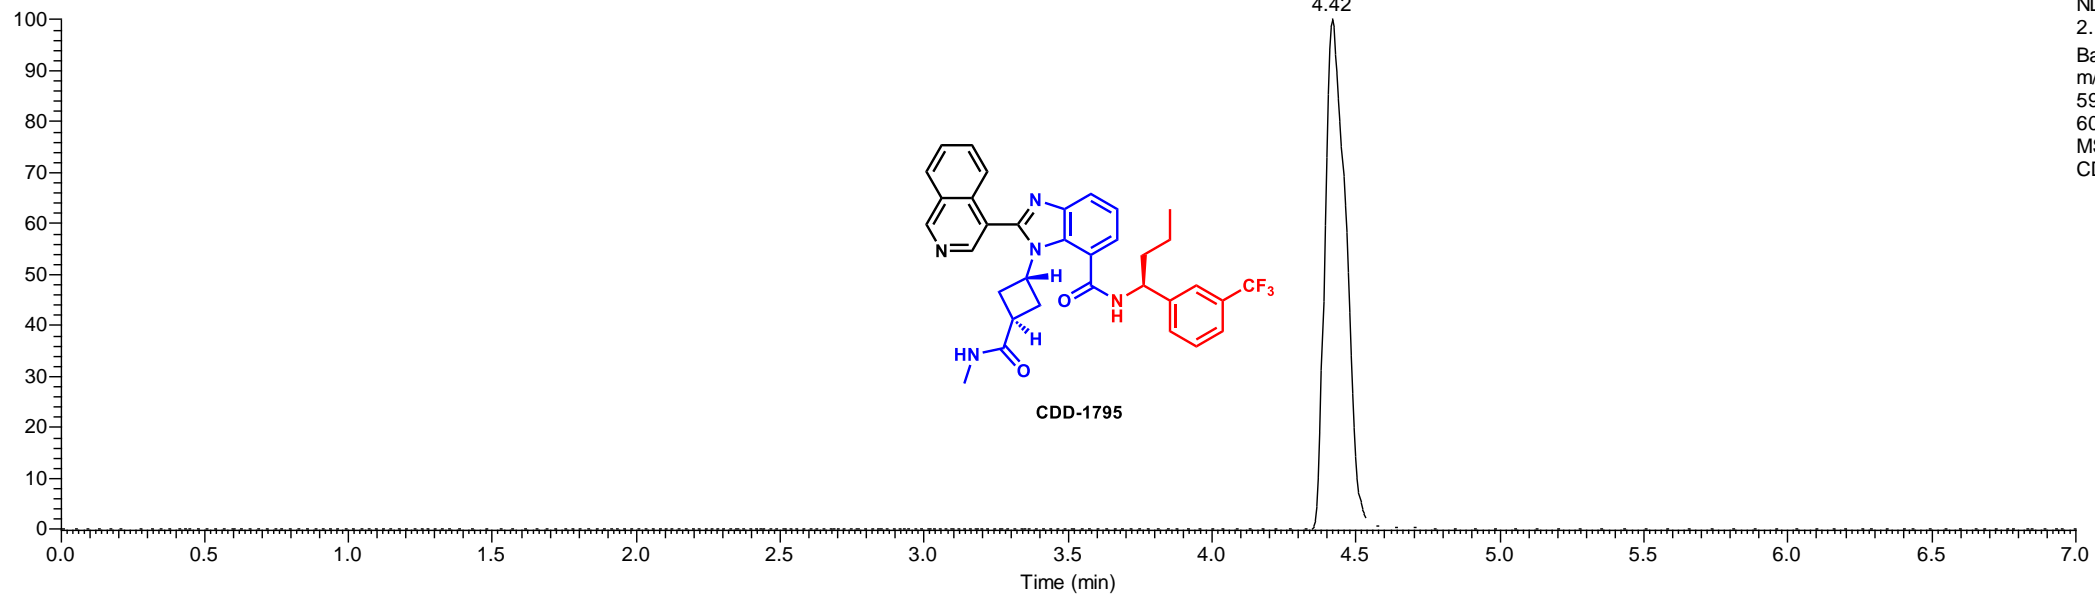CDD1795 #718 RT: 4.42 AV: 1 NL: 2.08E9  
T: FTMS + p ESI Full lock ms [100.0000-1000.0000]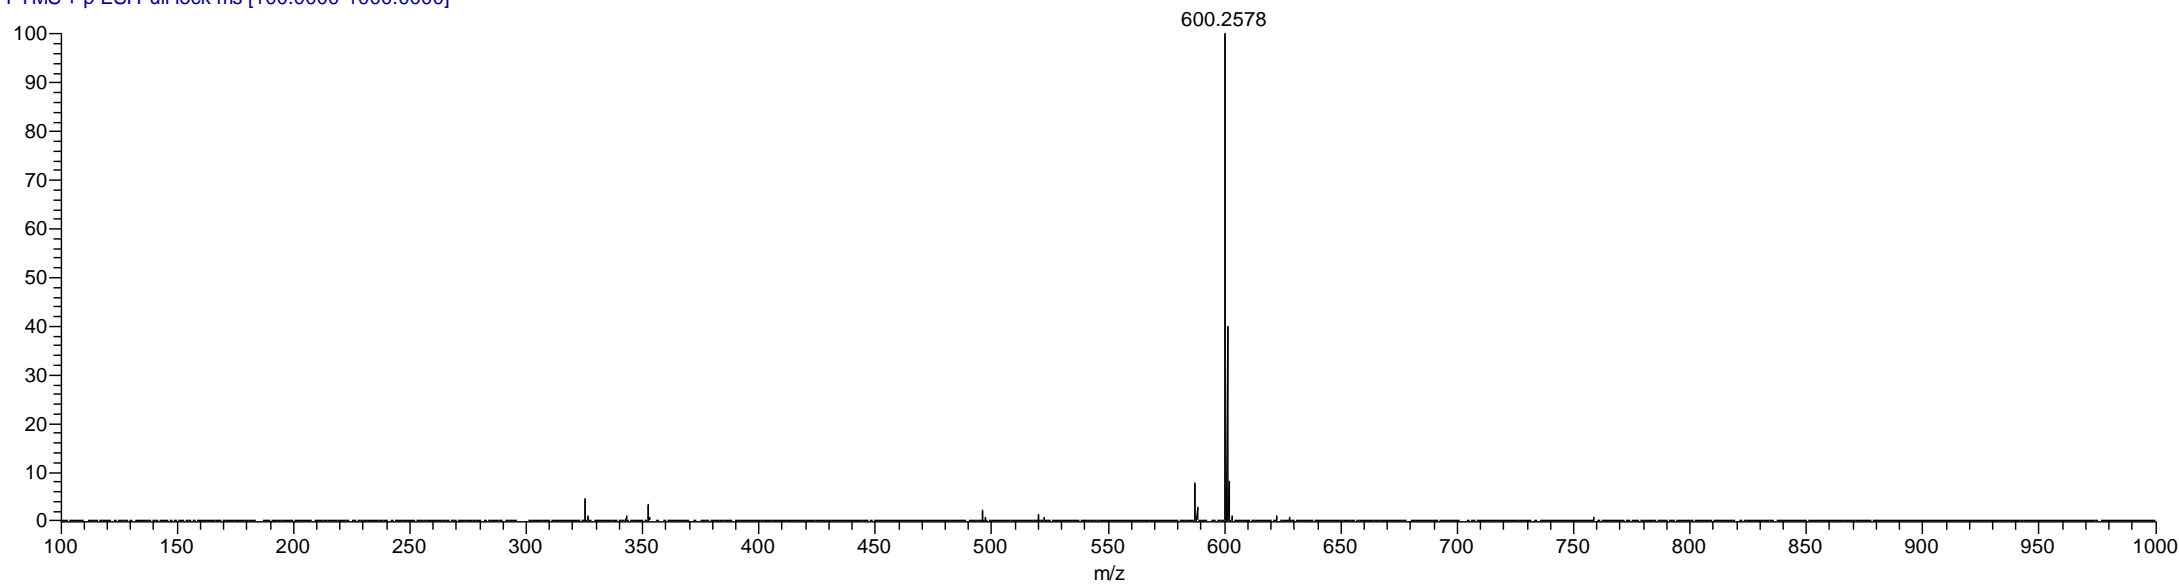



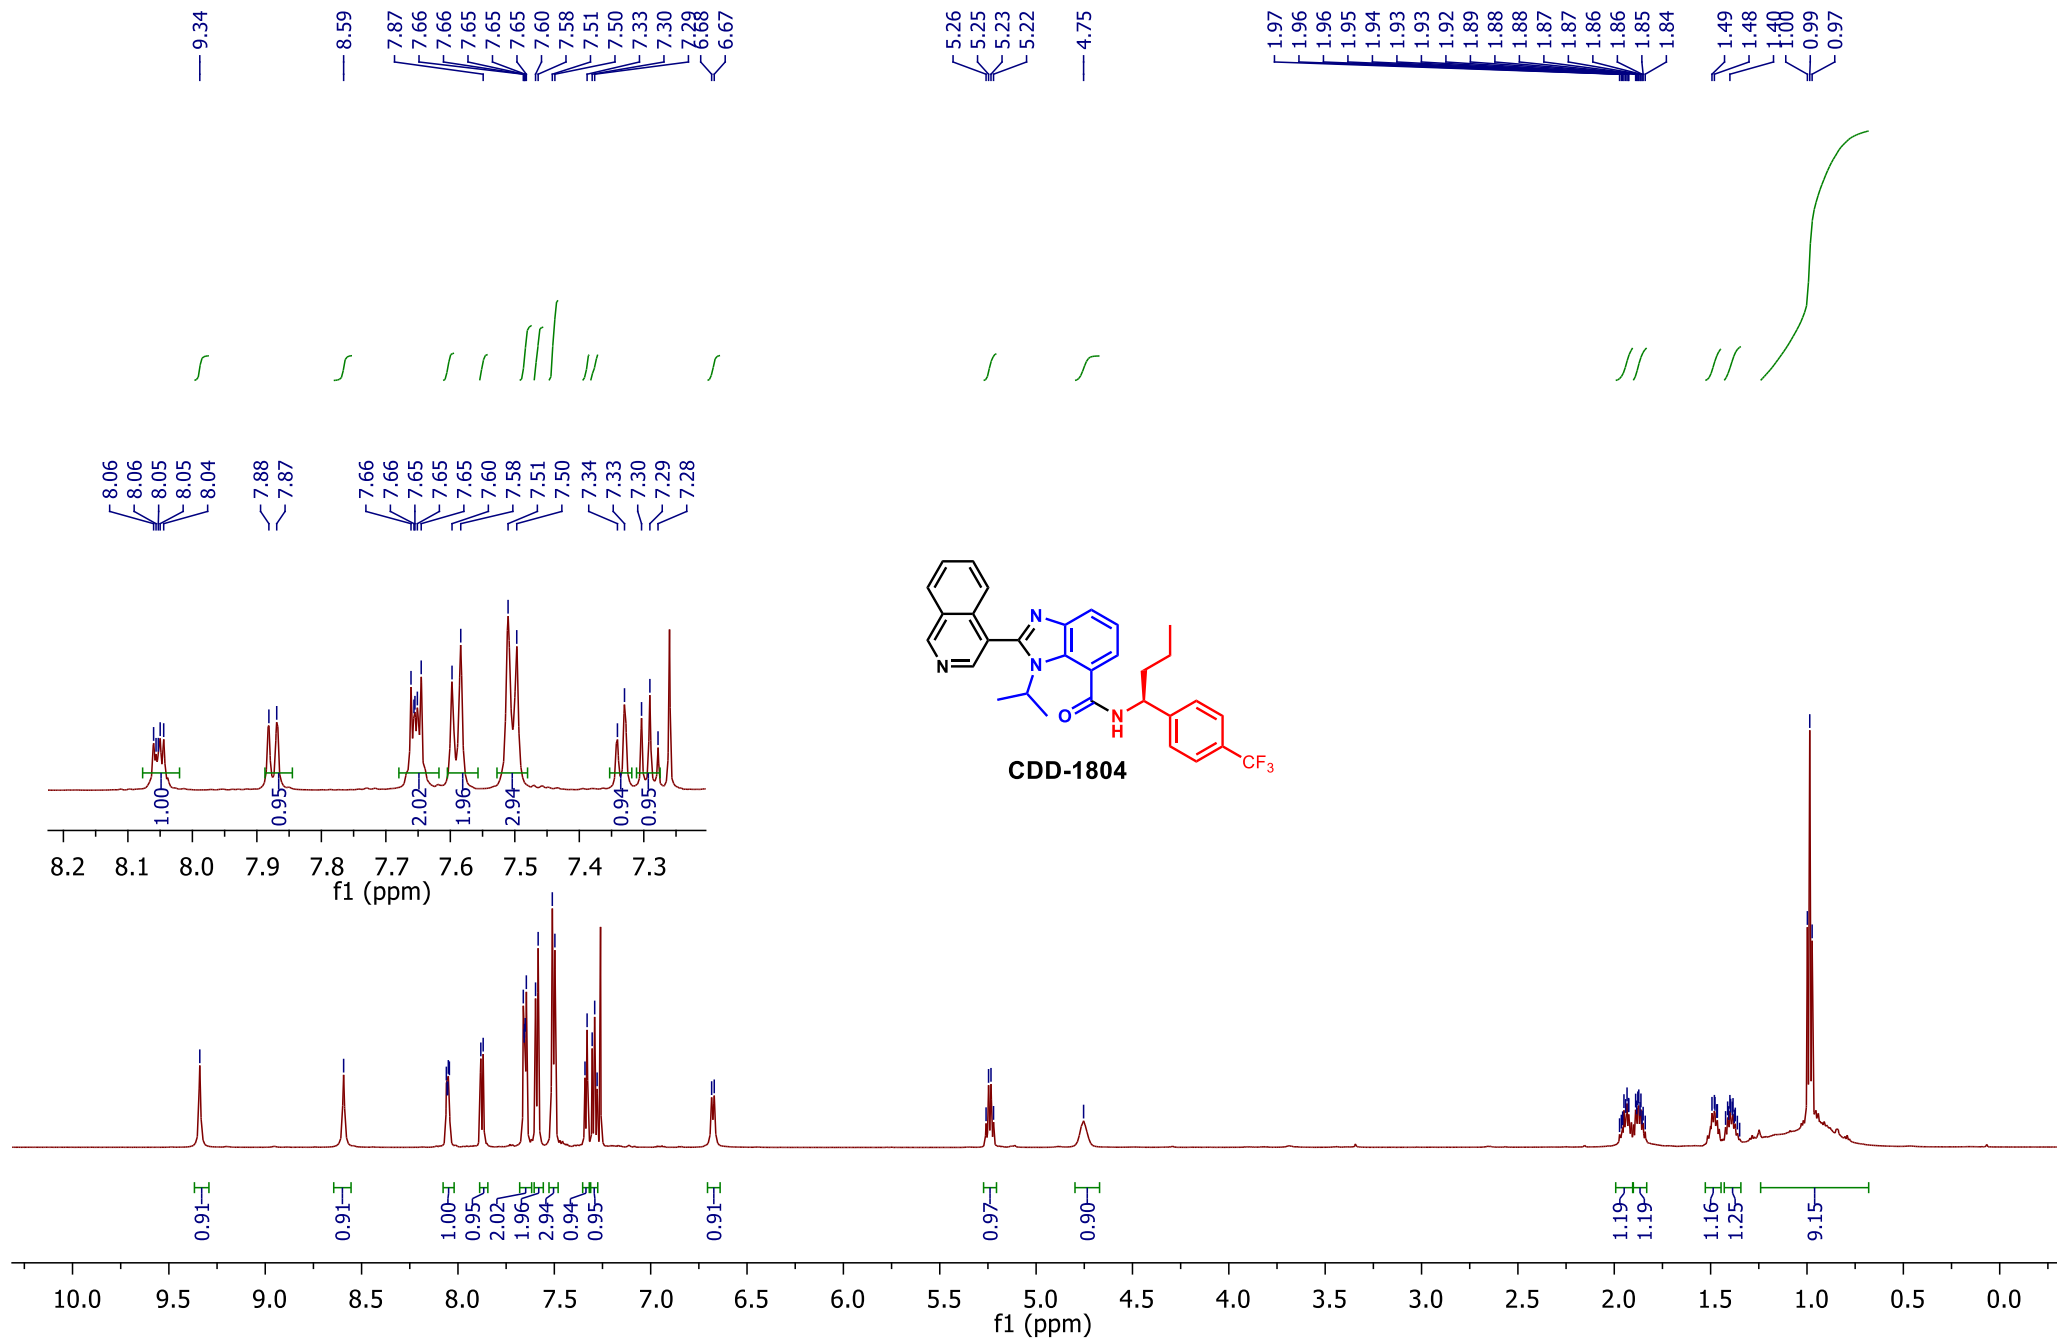

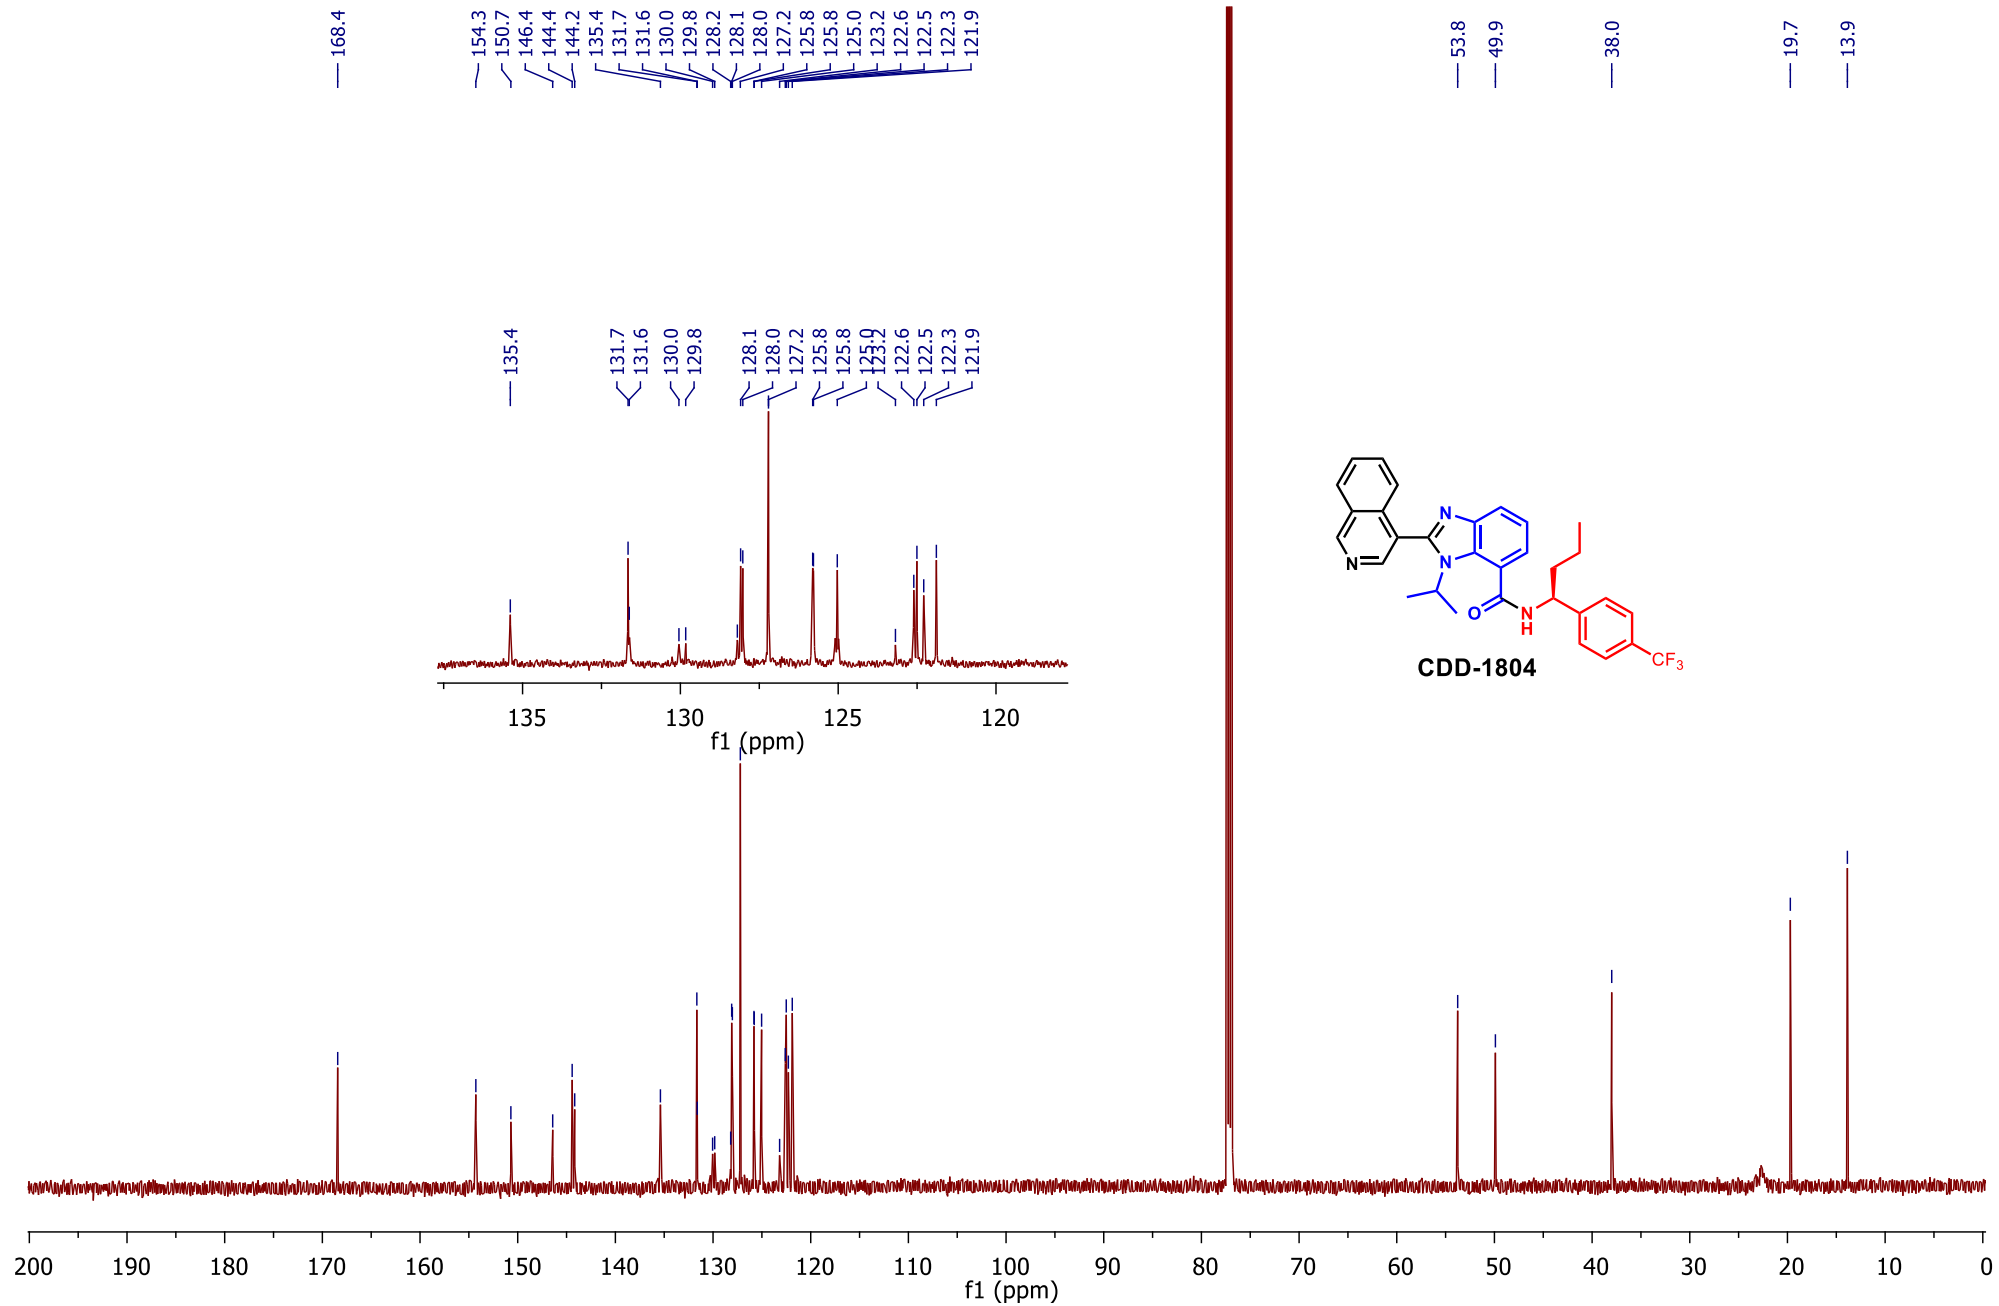

RT: 0.00 - 7.01

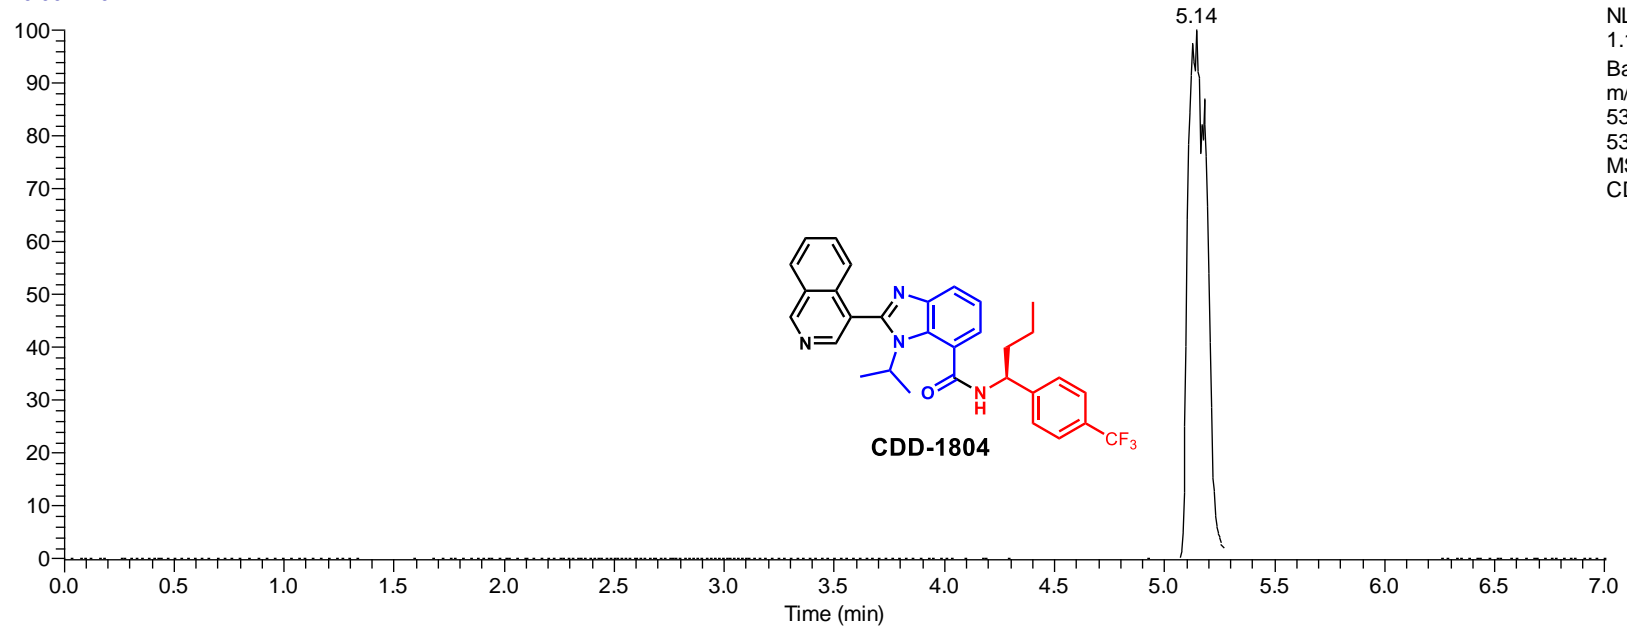

CDD1804 #693 RT: 5.14 AV: 1 NL: 1.08E9  
T: FTMS + p ESI Full lock ms [100.0000-1000.0000]

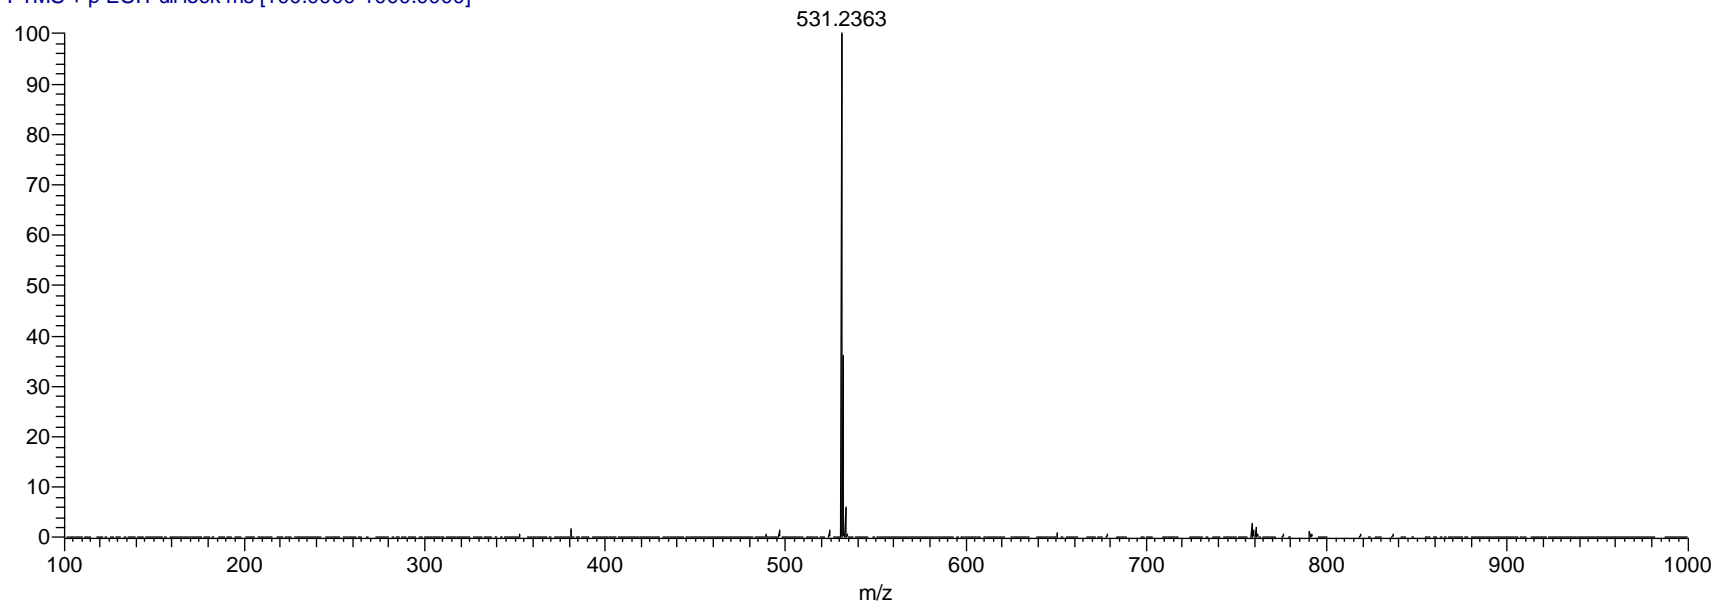

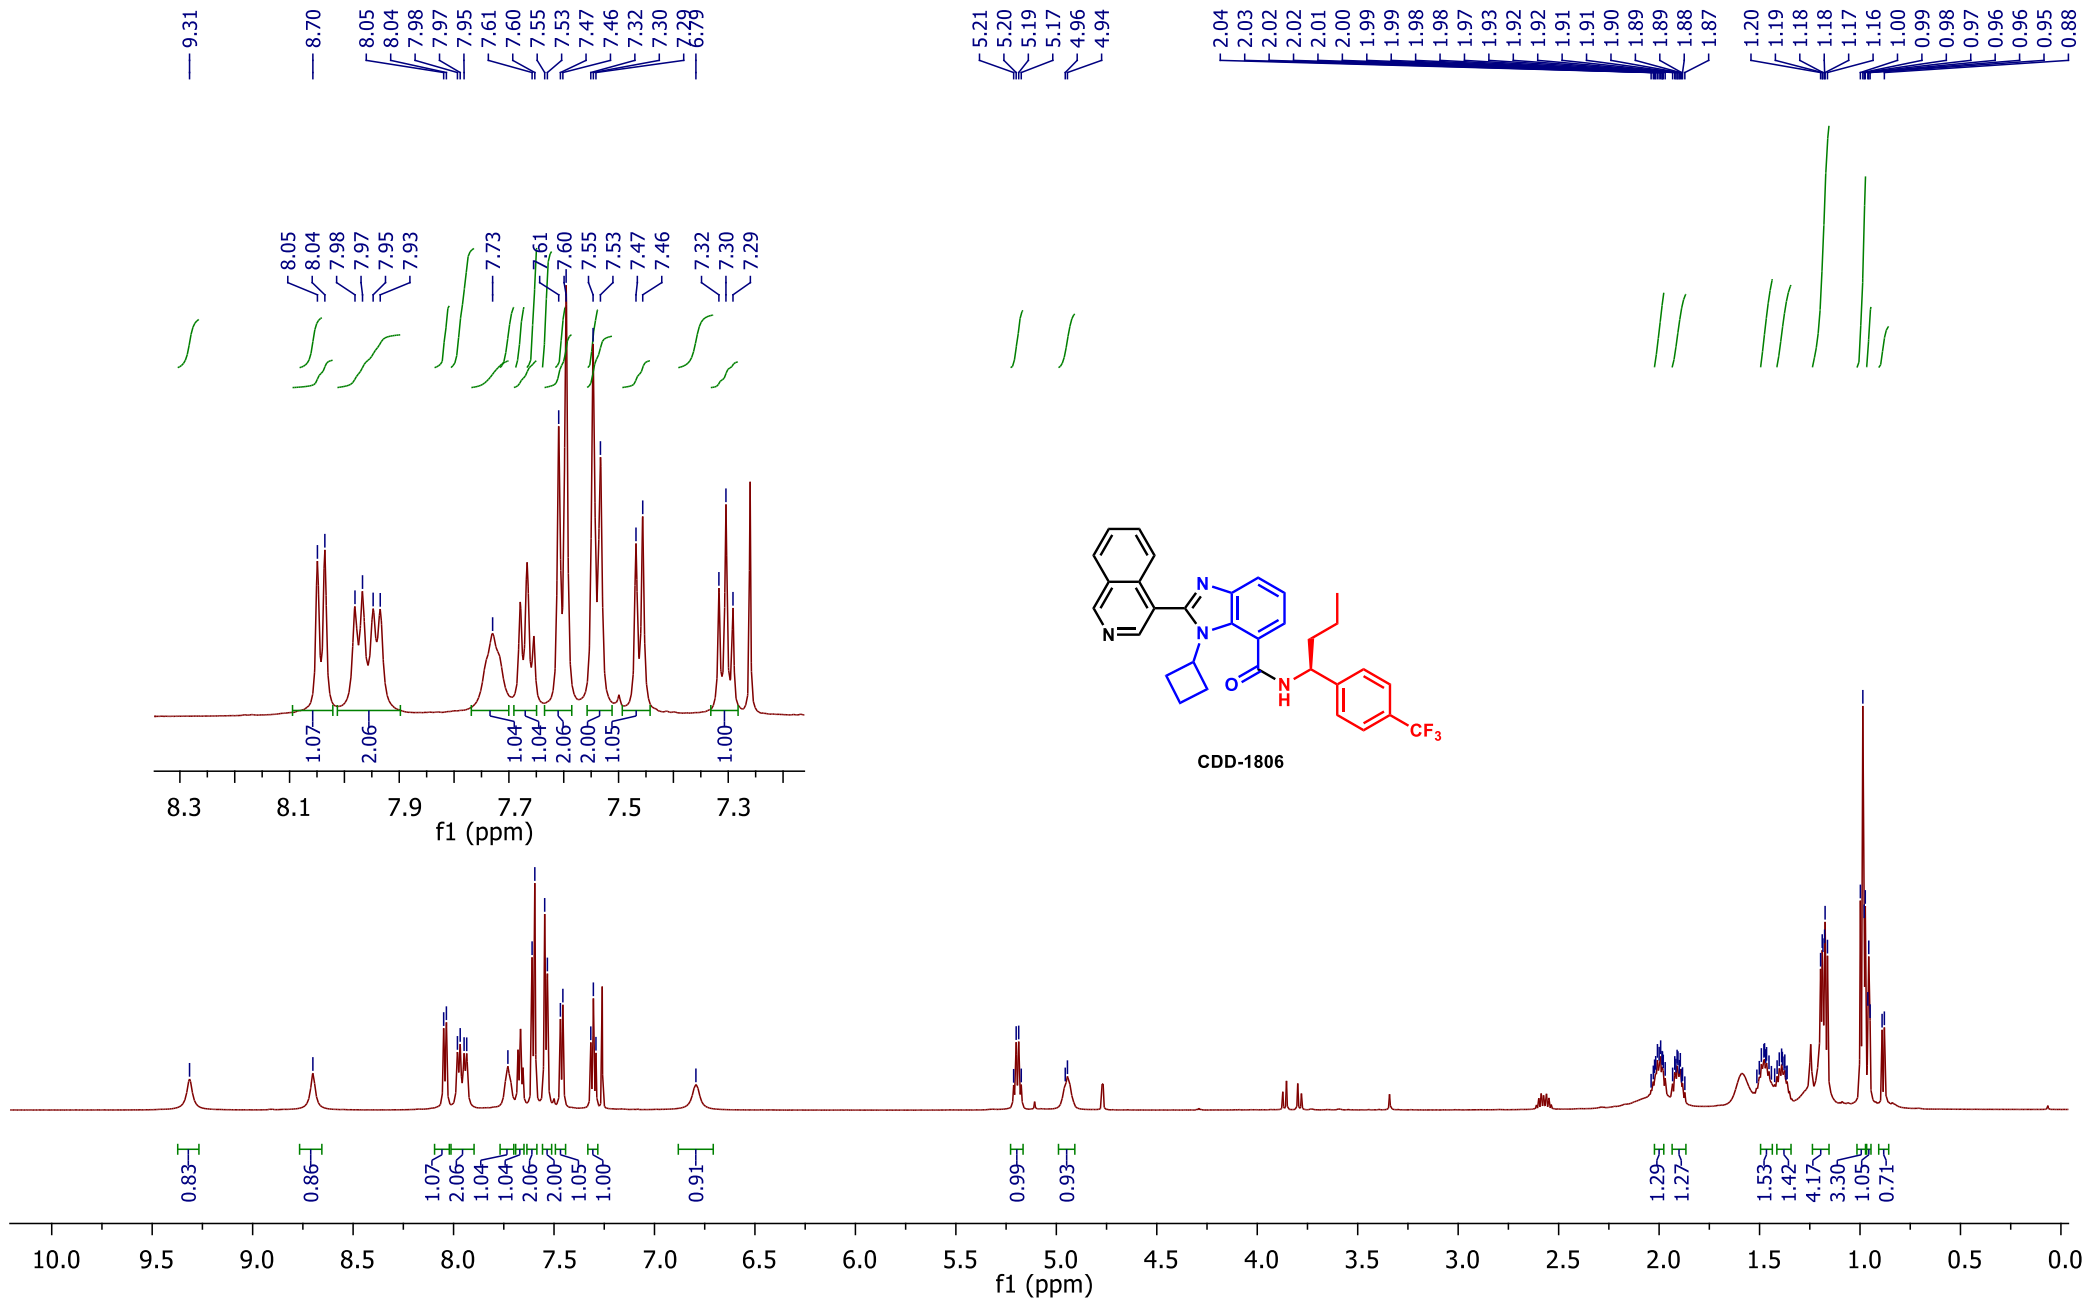

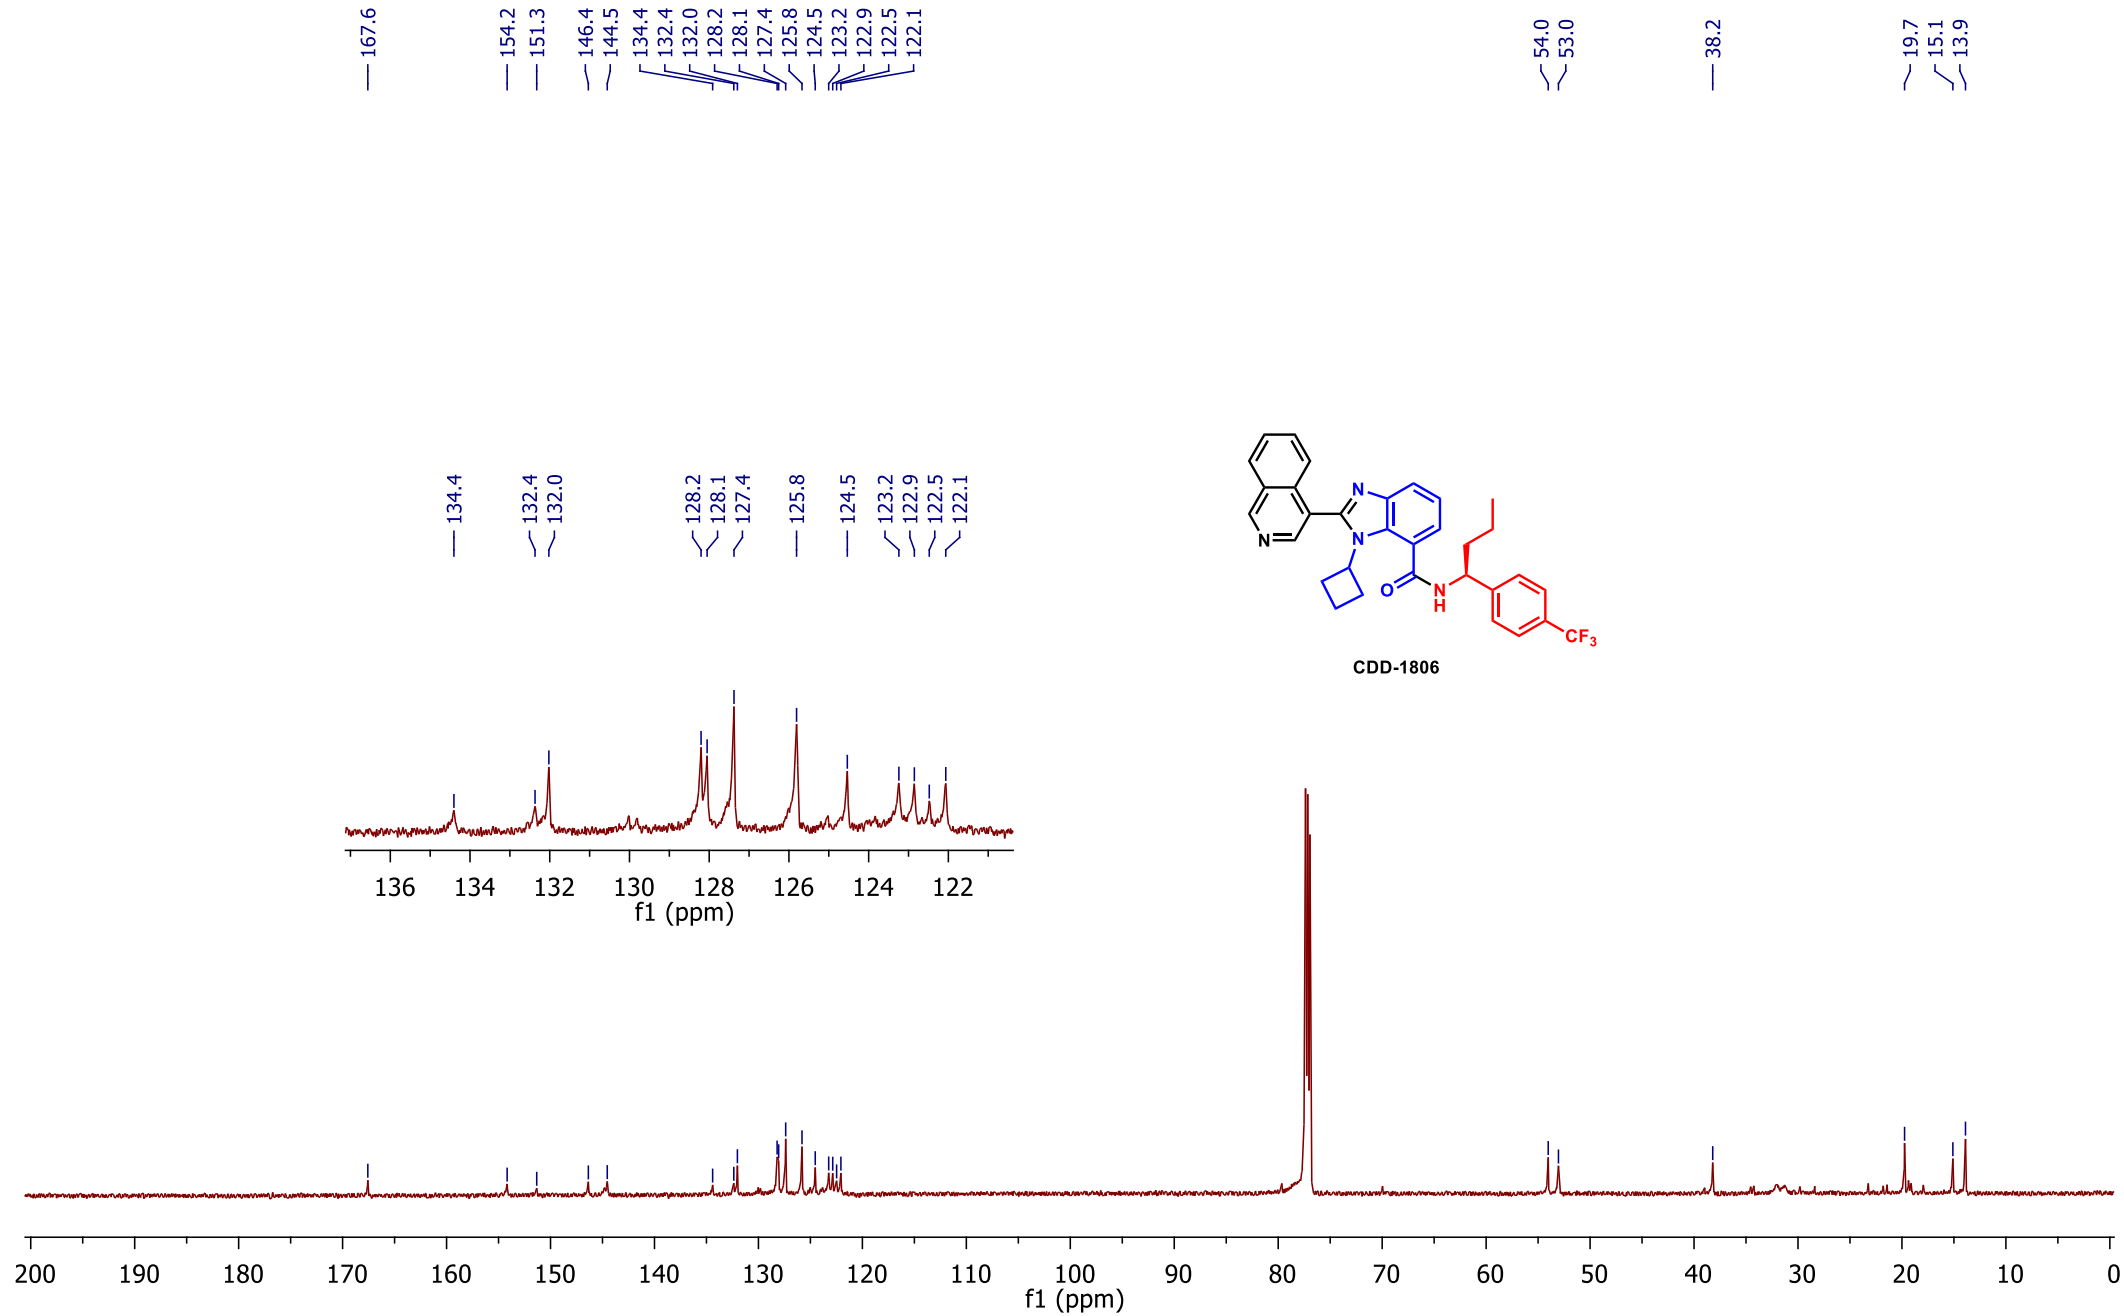

RT: 0.00 - 7.01 SM: 7B

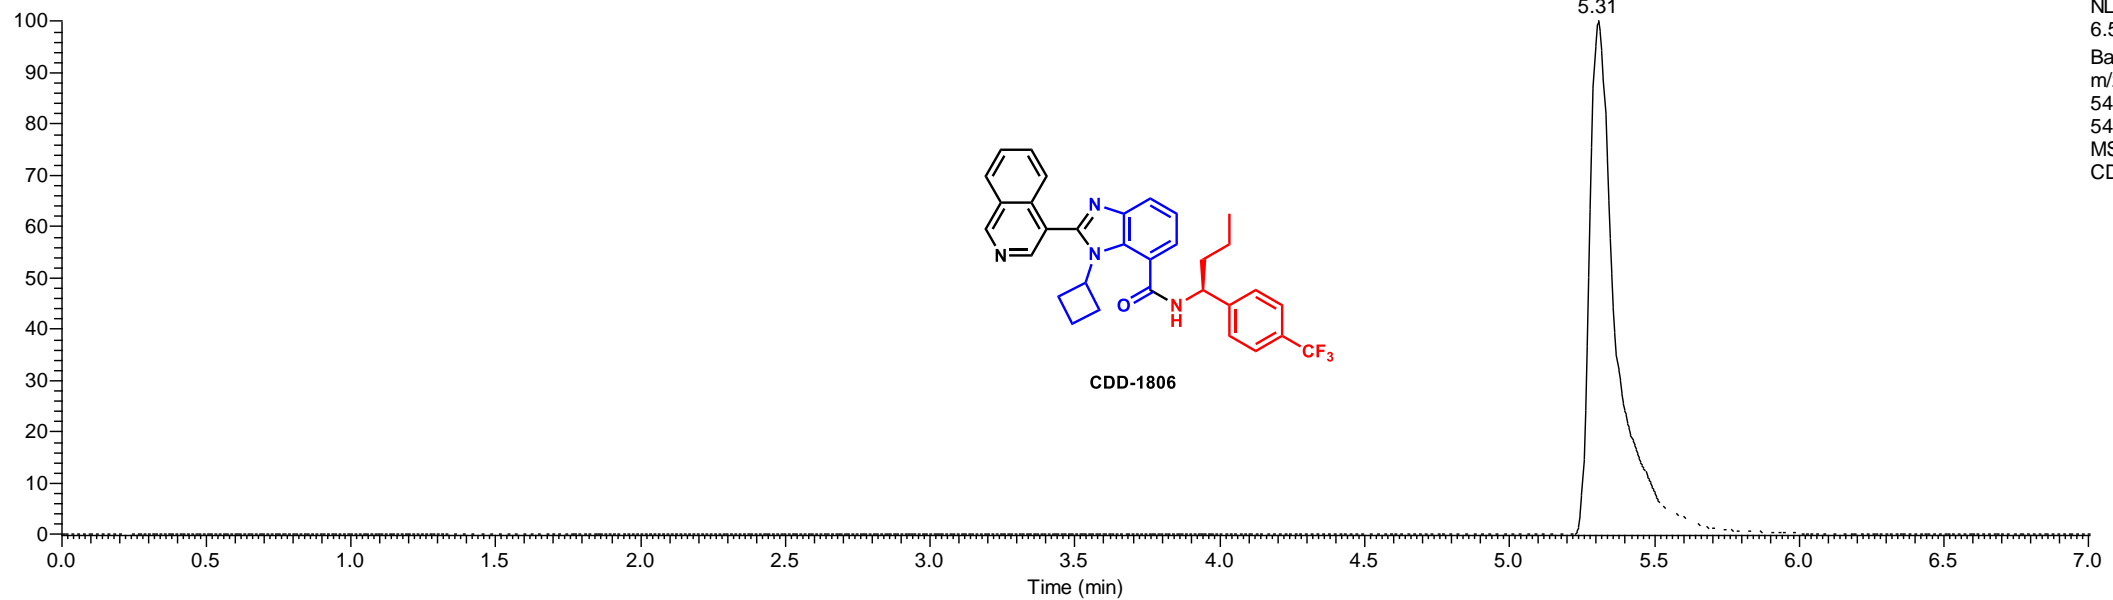

NL:  
6.56E9  
Base Peak  
m/z=  
542.7366-  
543.7366  
MS  
CDD1806

CDD1806 #725 RT: 5.31 AV: 1 NL: 6.78E9  
T: FTMS + p ESI Full ms [100.0000-1000.0000]

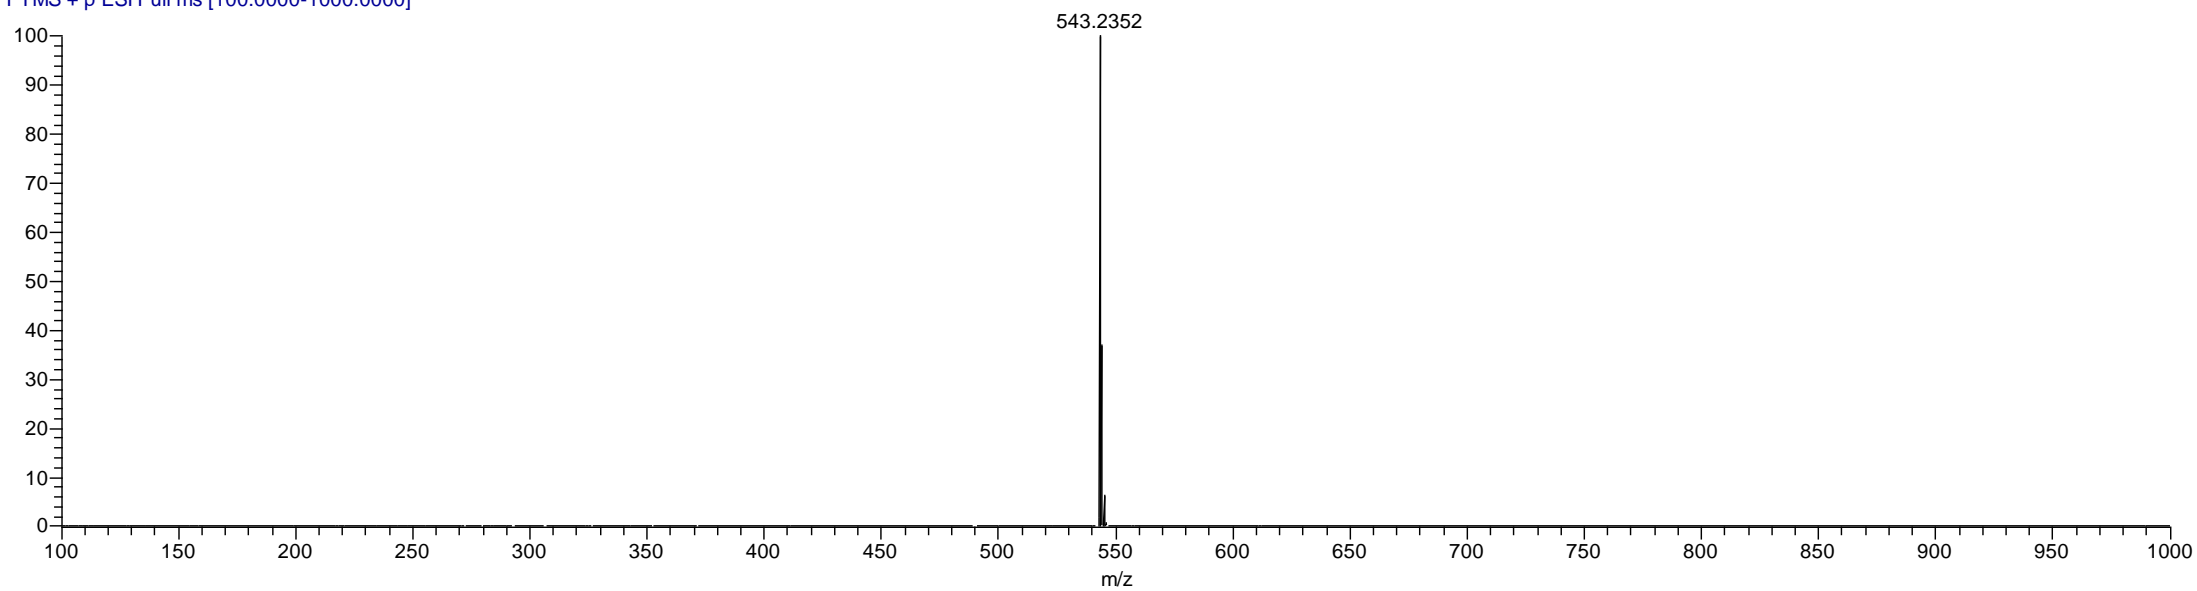

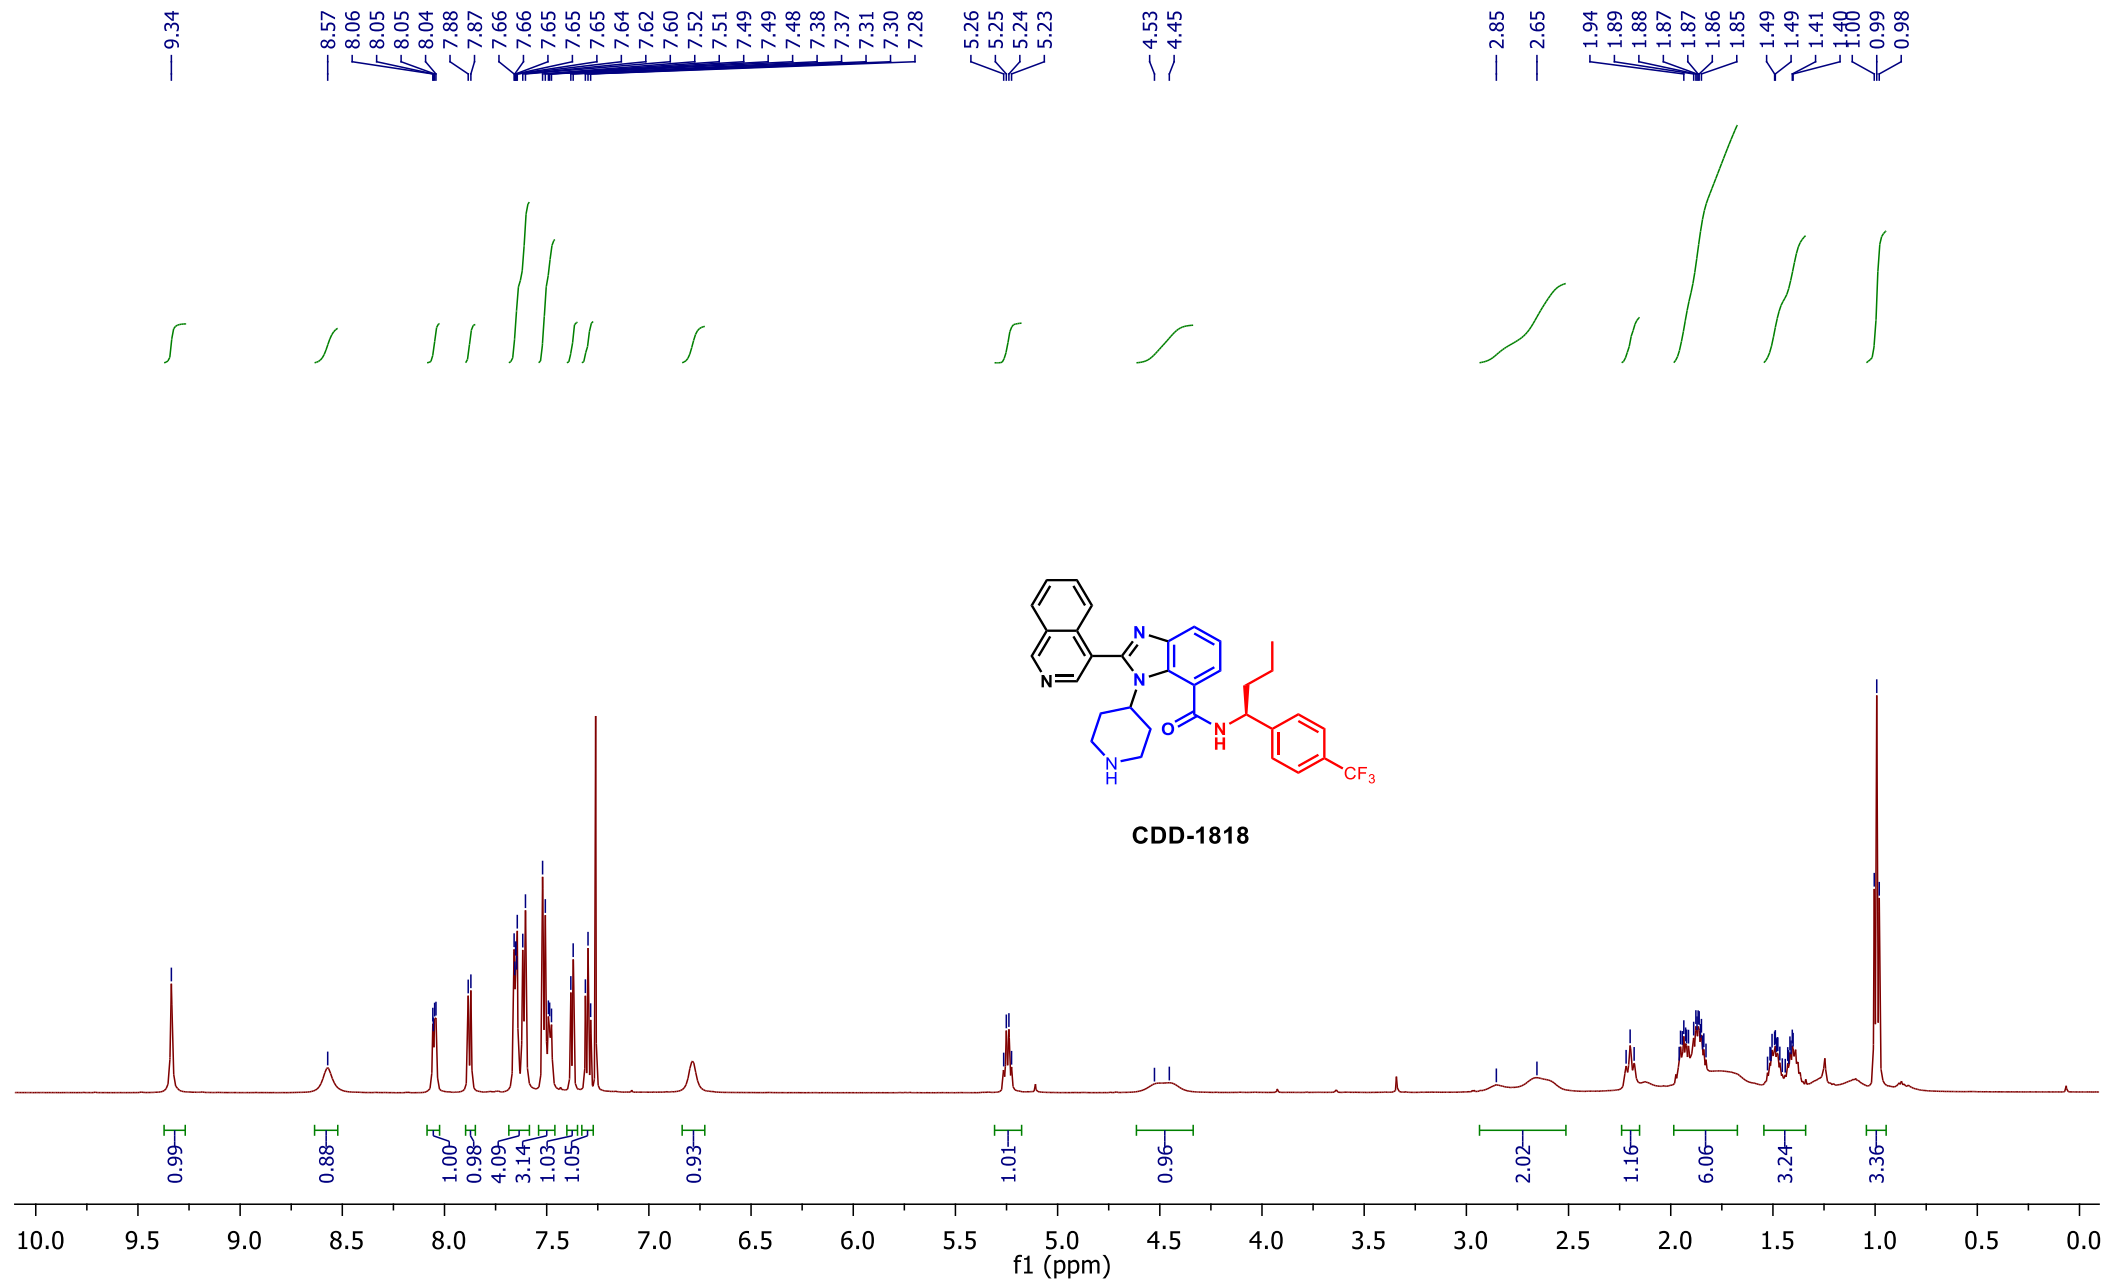

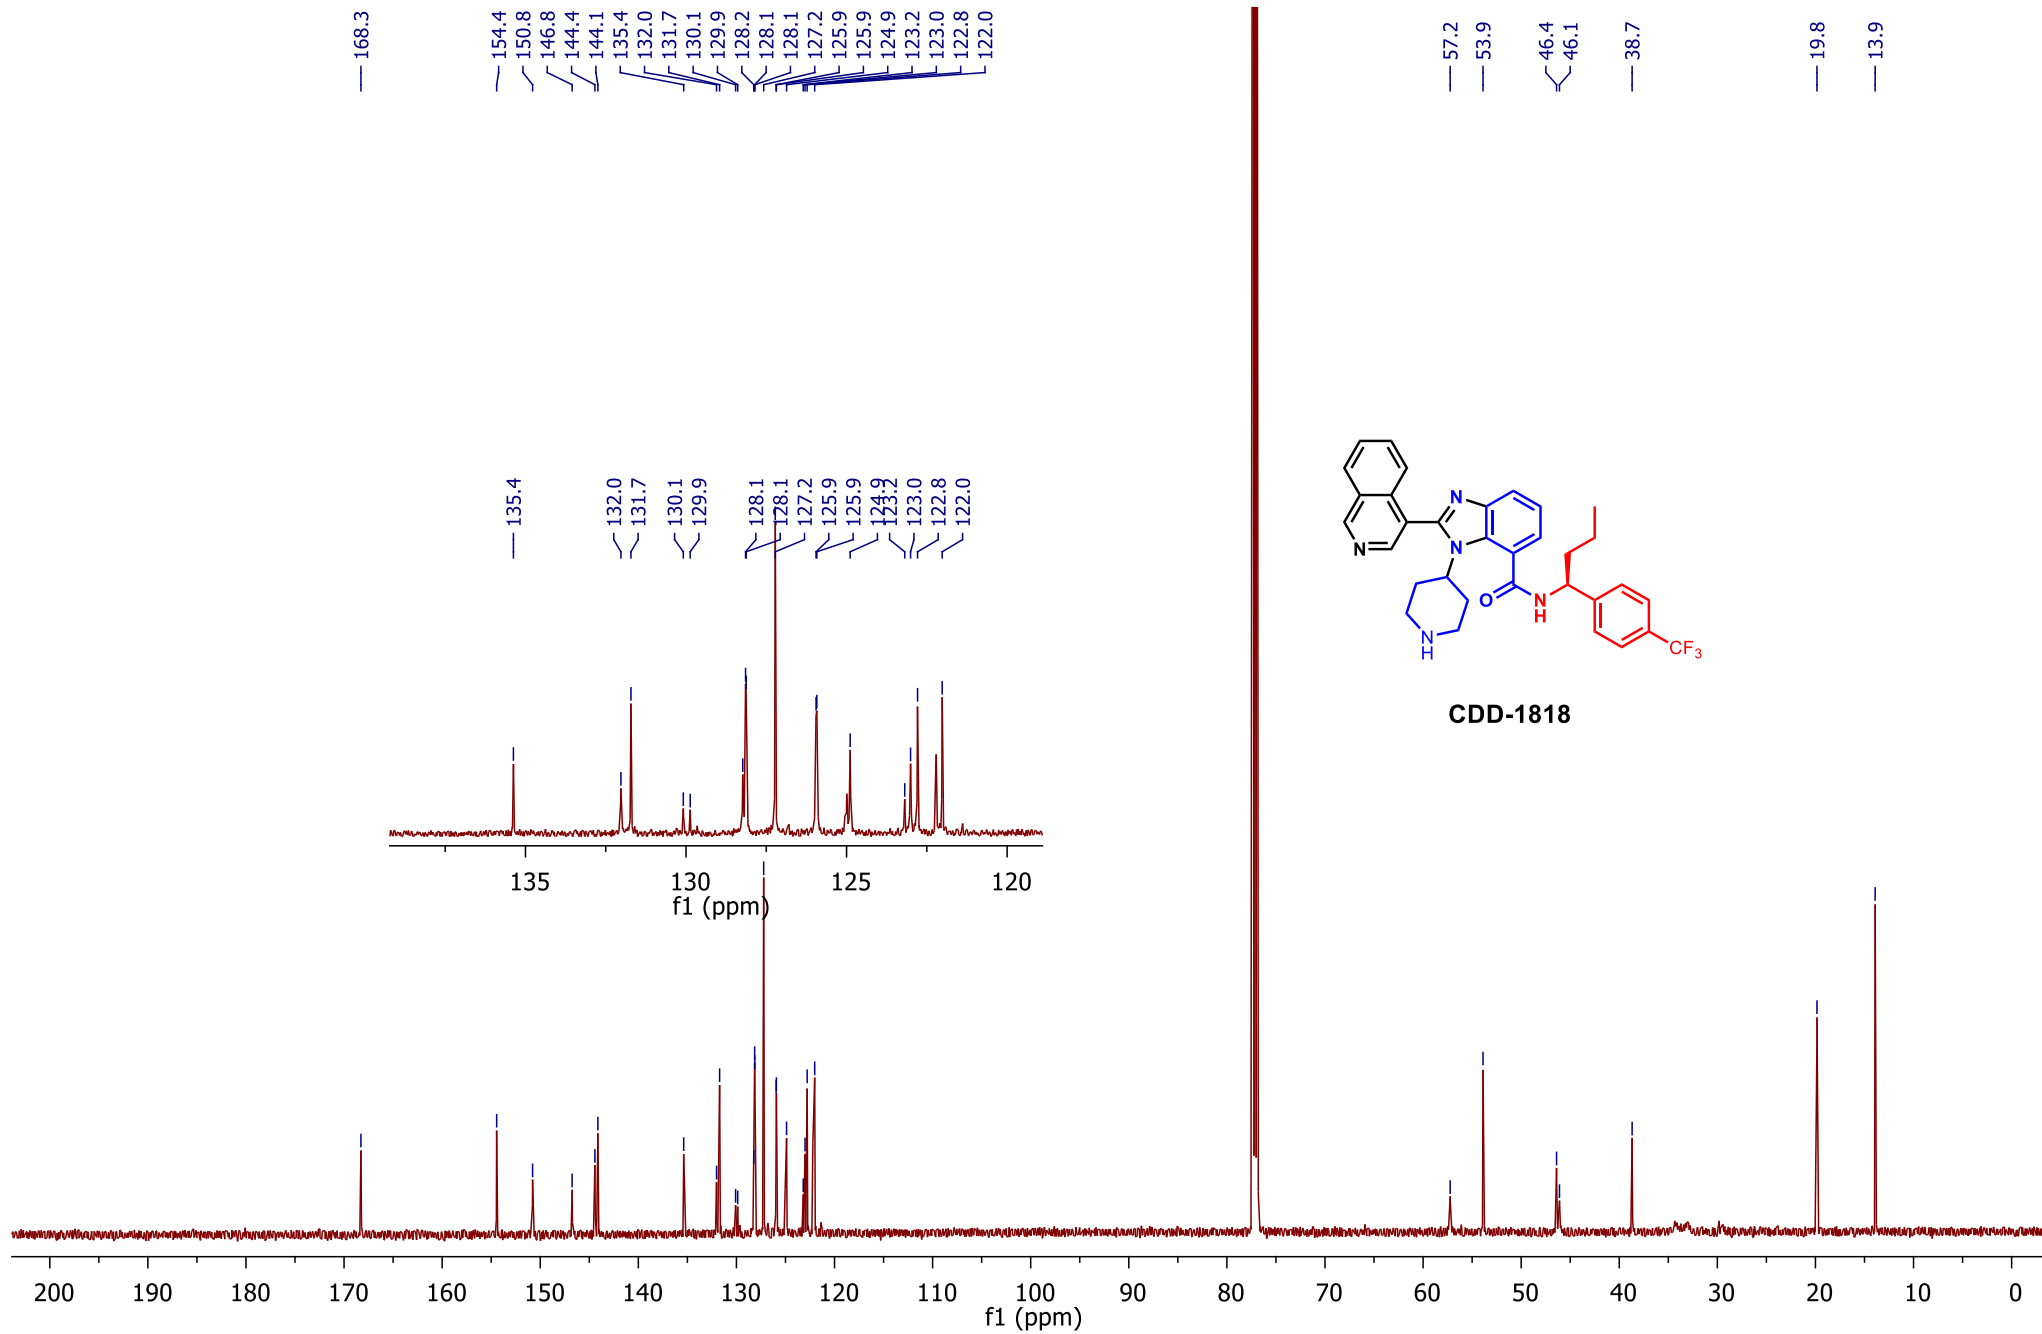



RT: 0.00 - 7.00

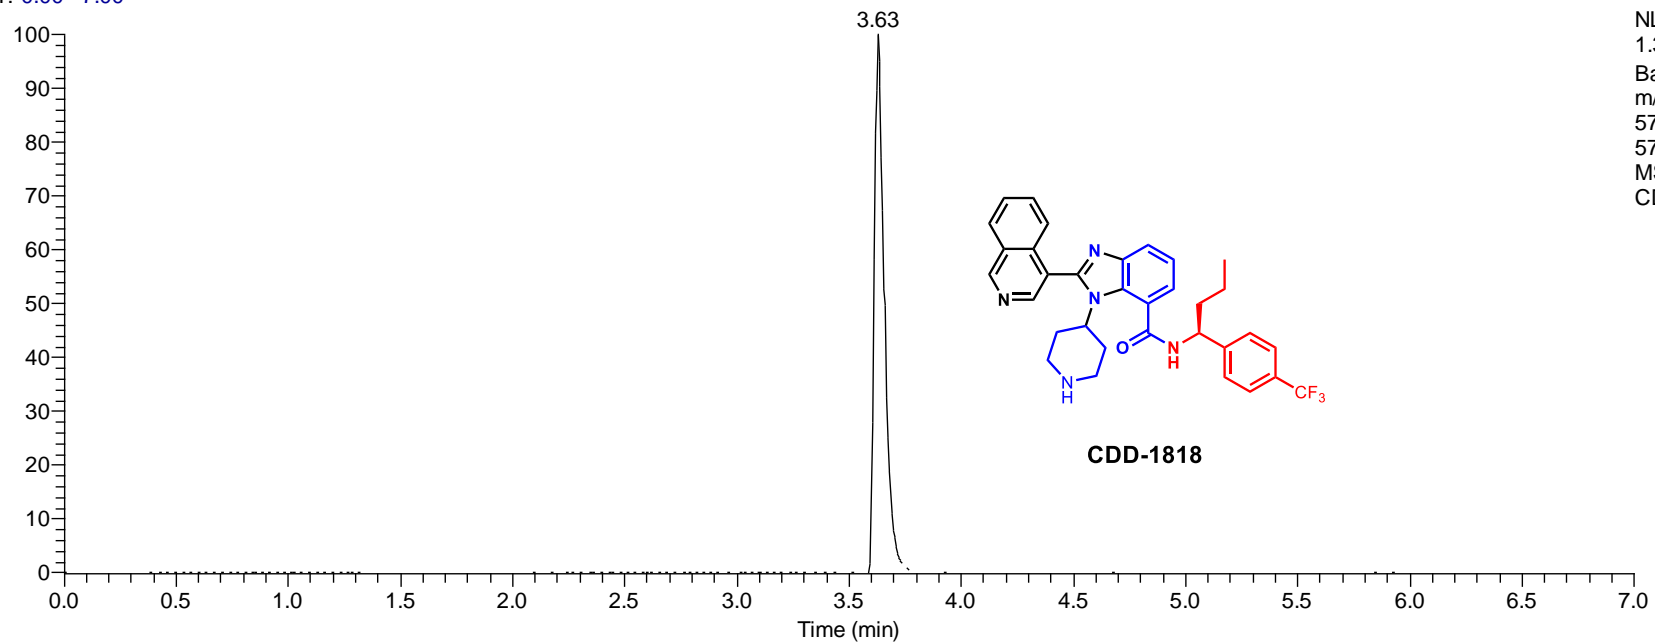

CDD1818 #534 RT: 3.63 AV: 1 NL: 4.46E8  
T: FTMS + p ESI Full ms [100.0000-1000.0000]

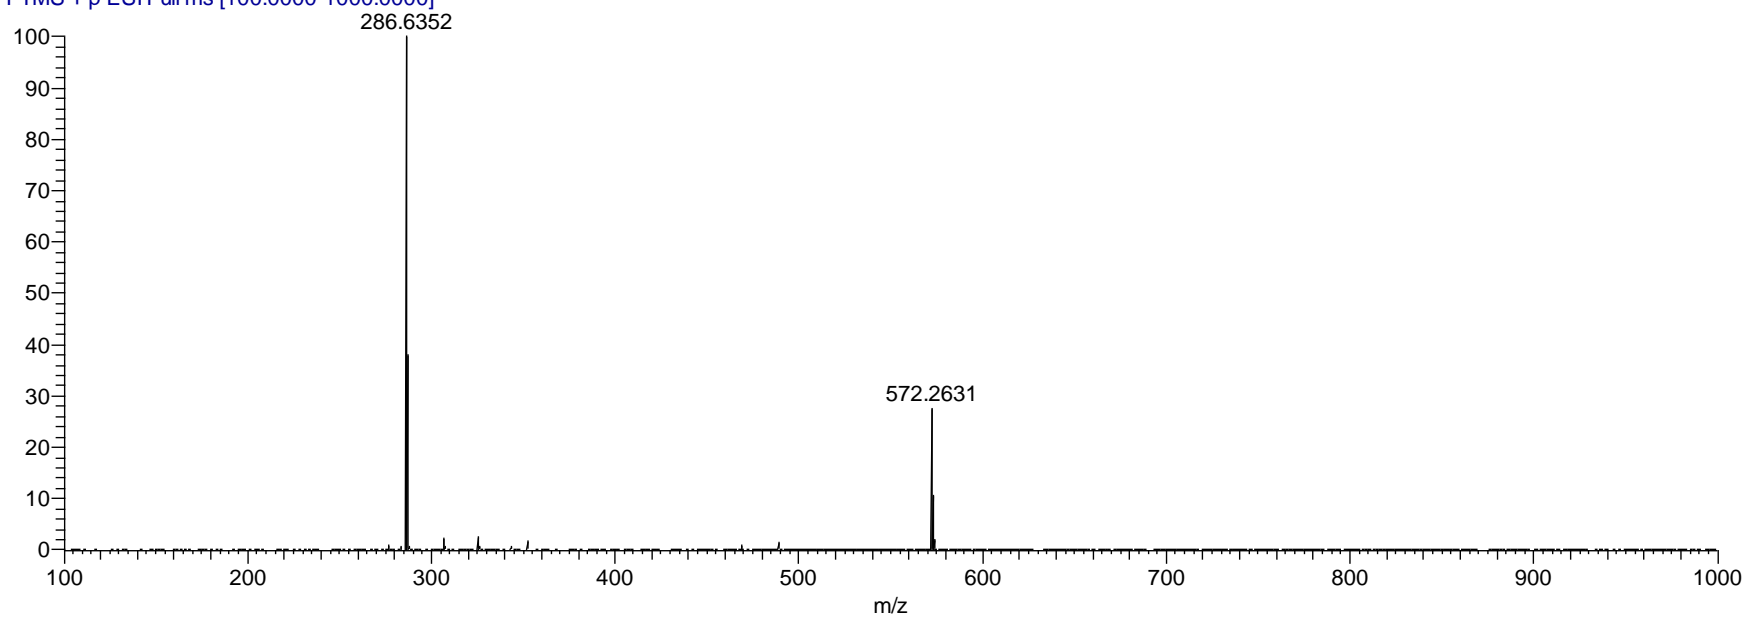

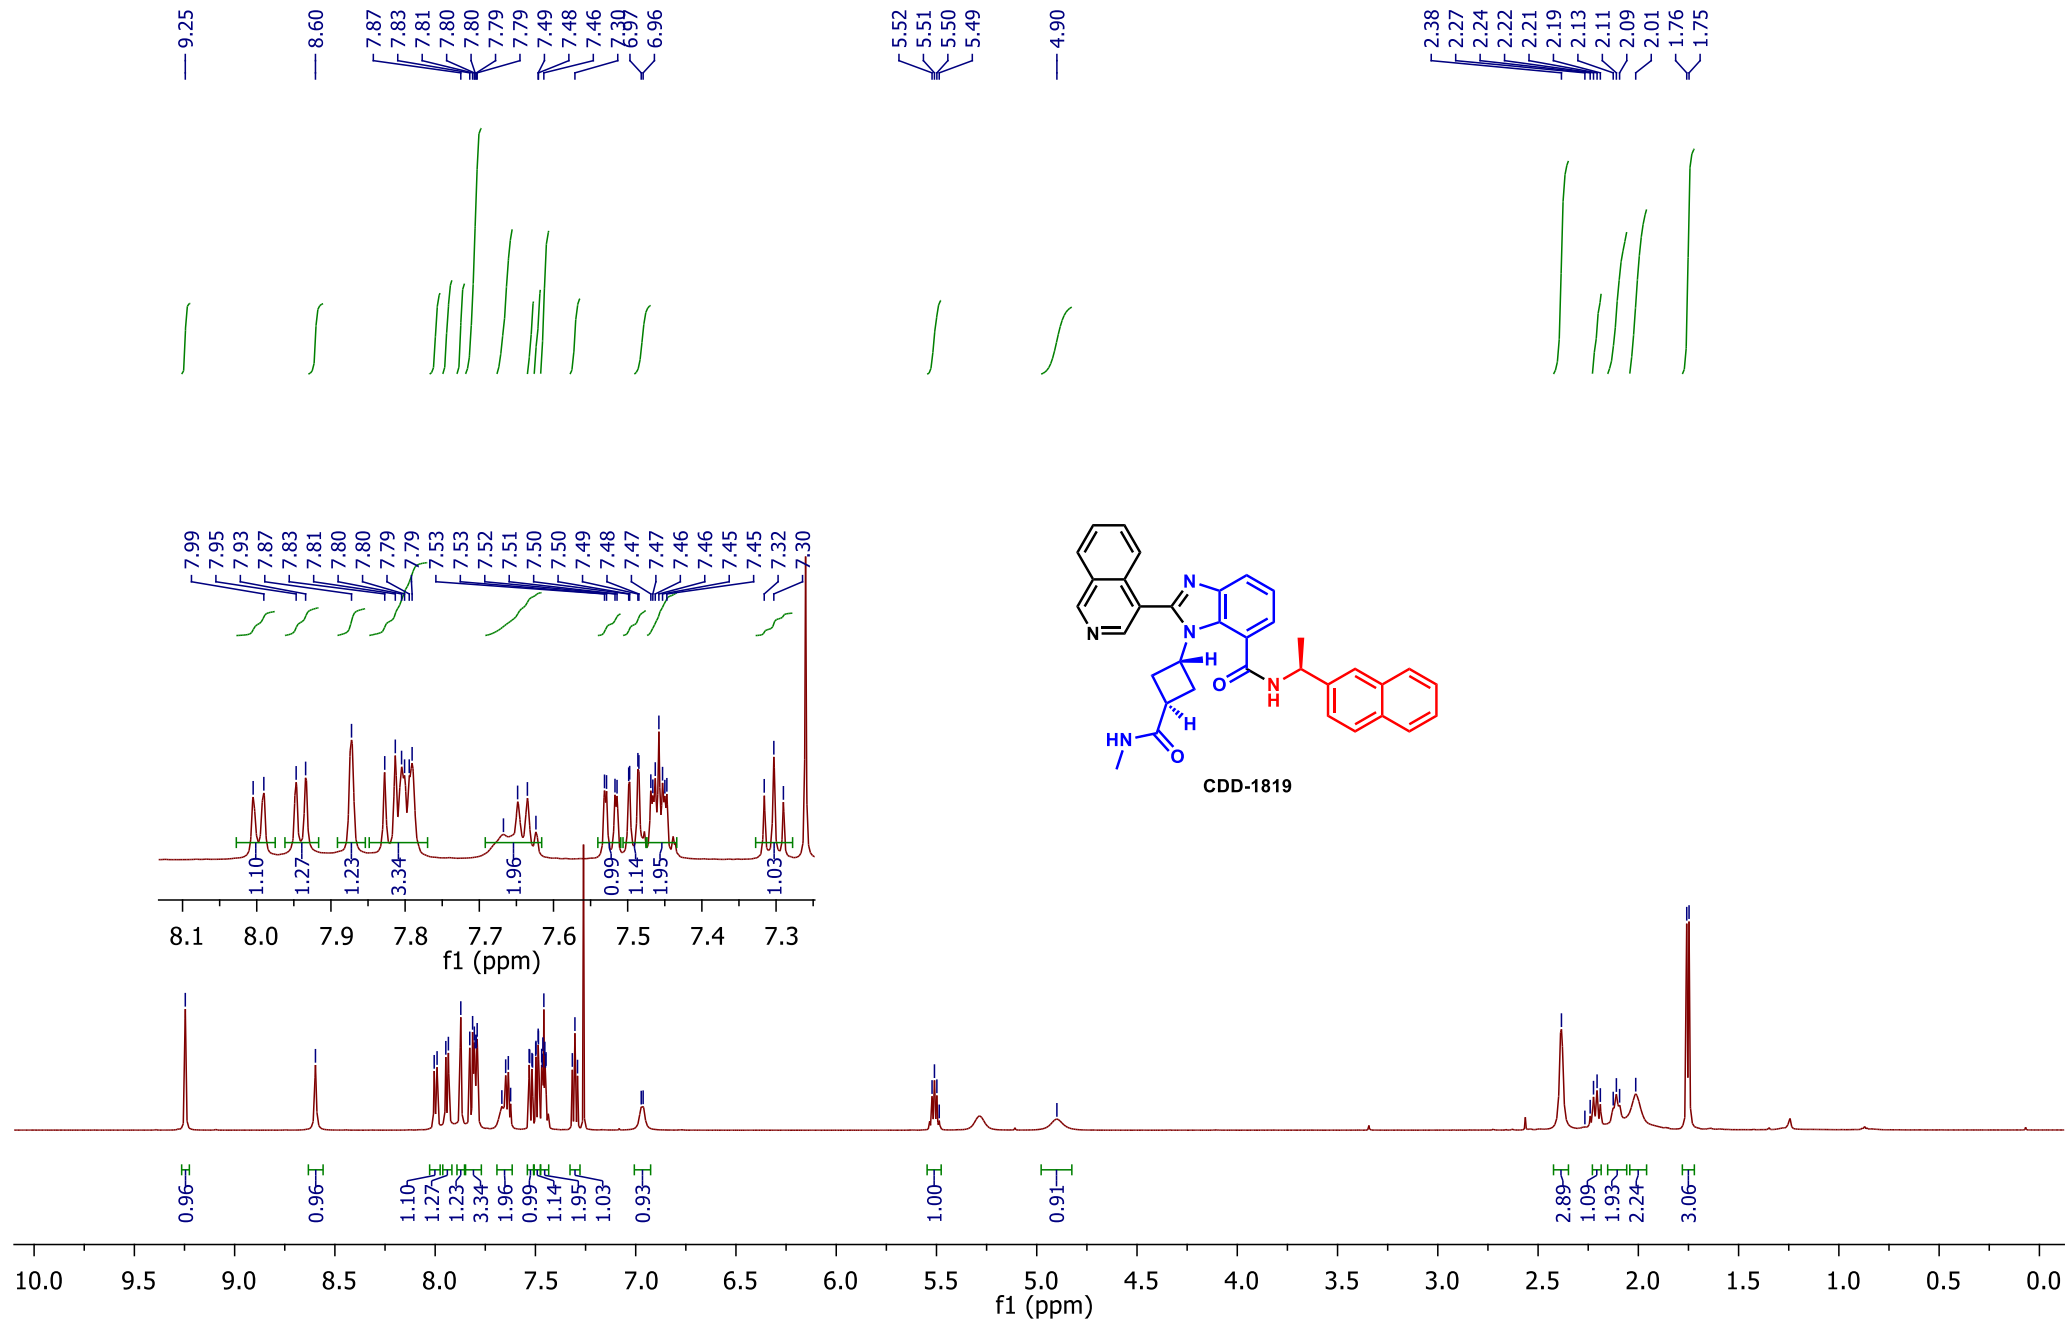

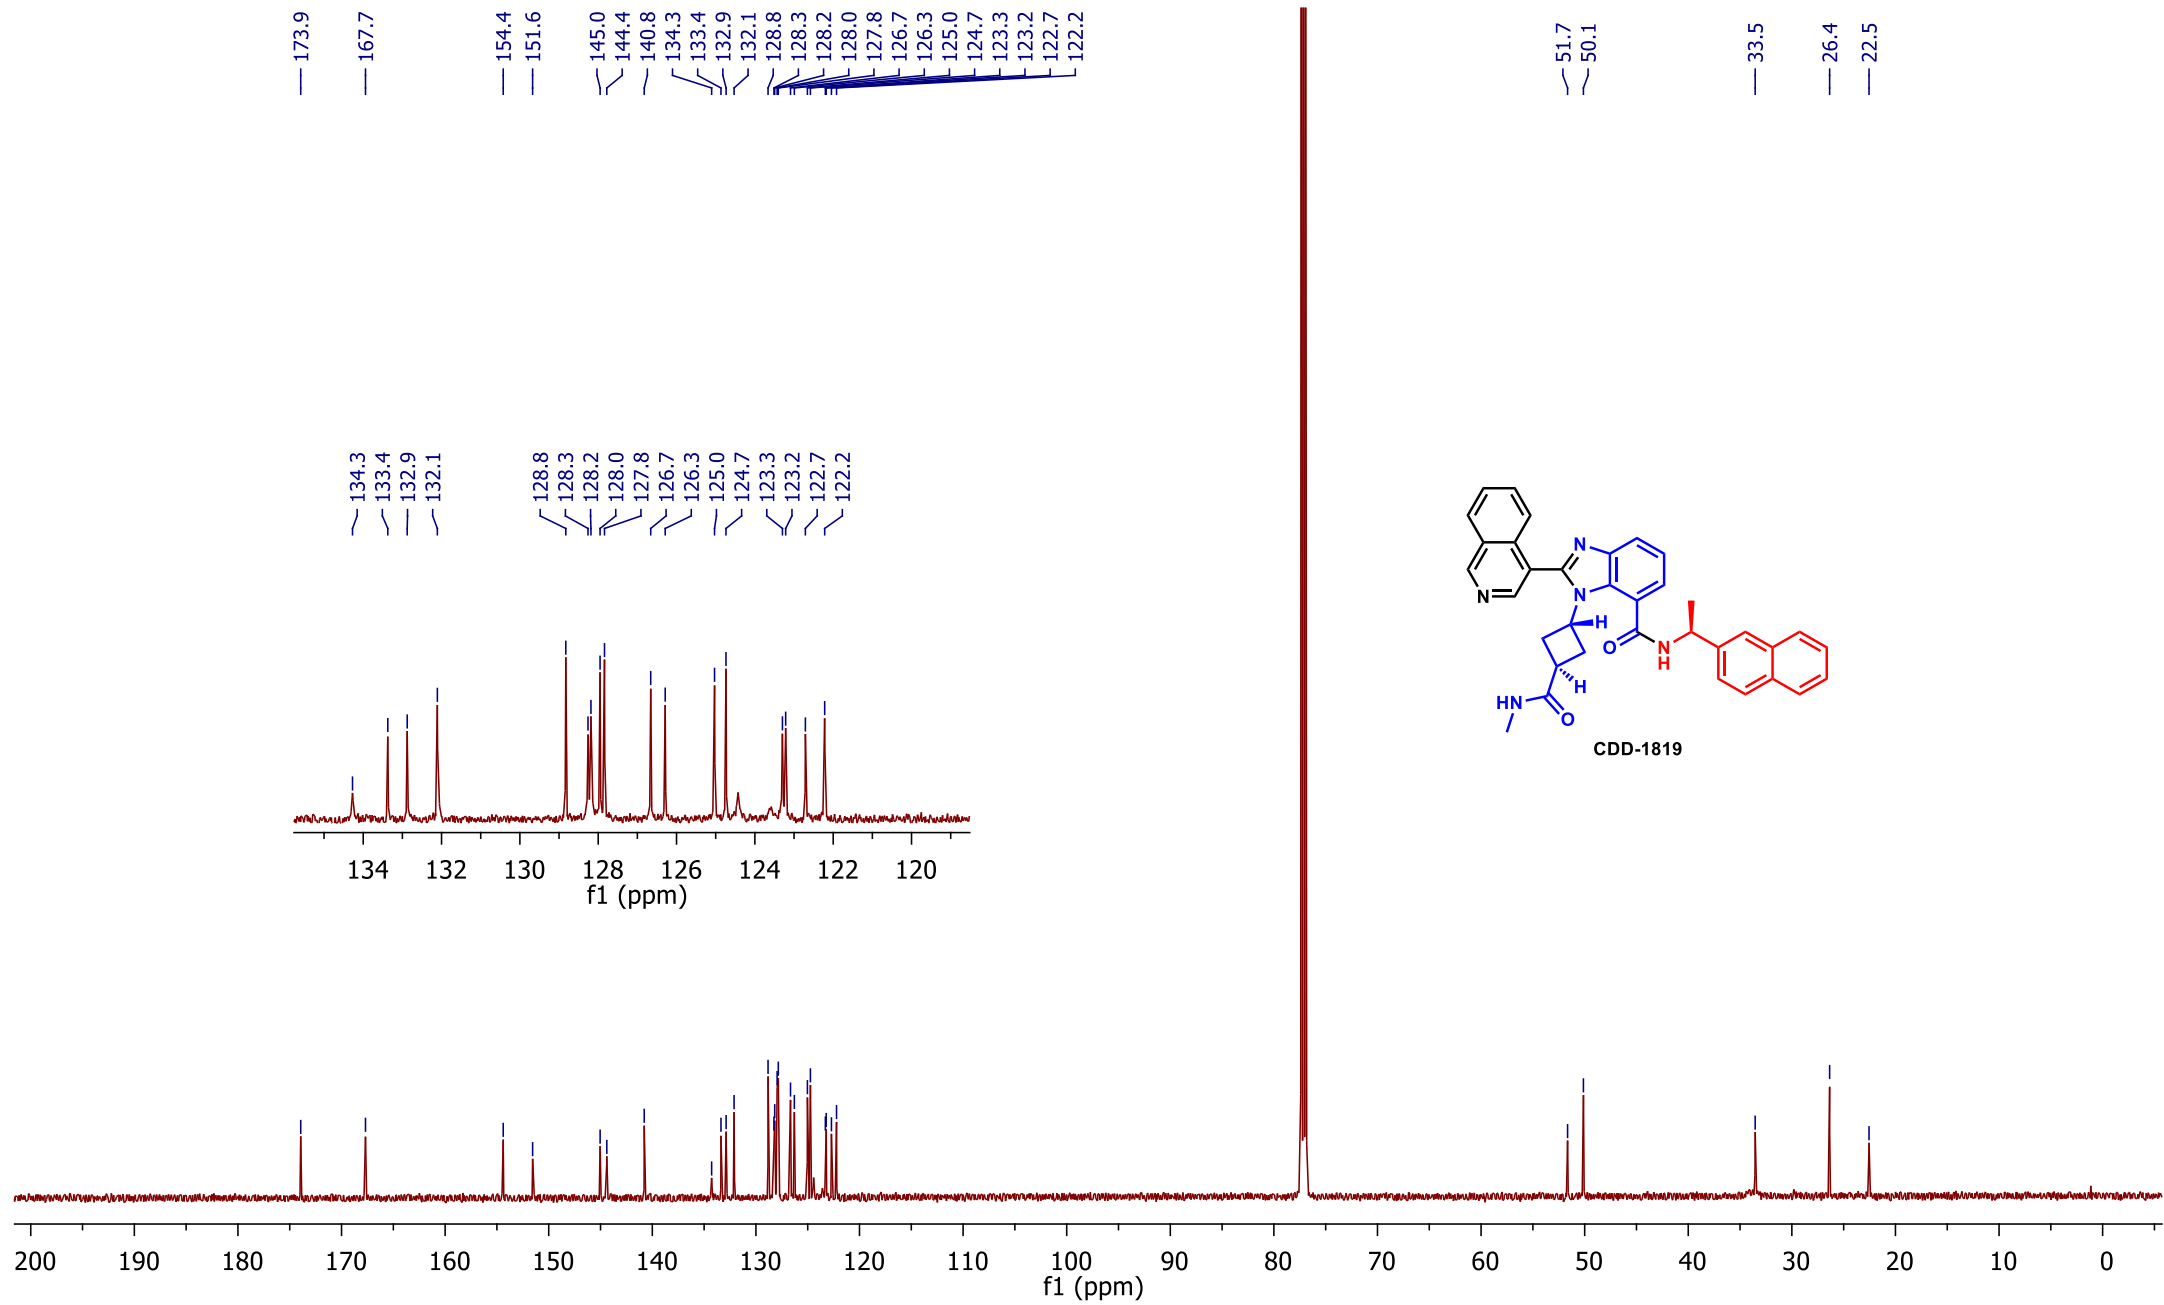

RT: 0.00 - 7.00

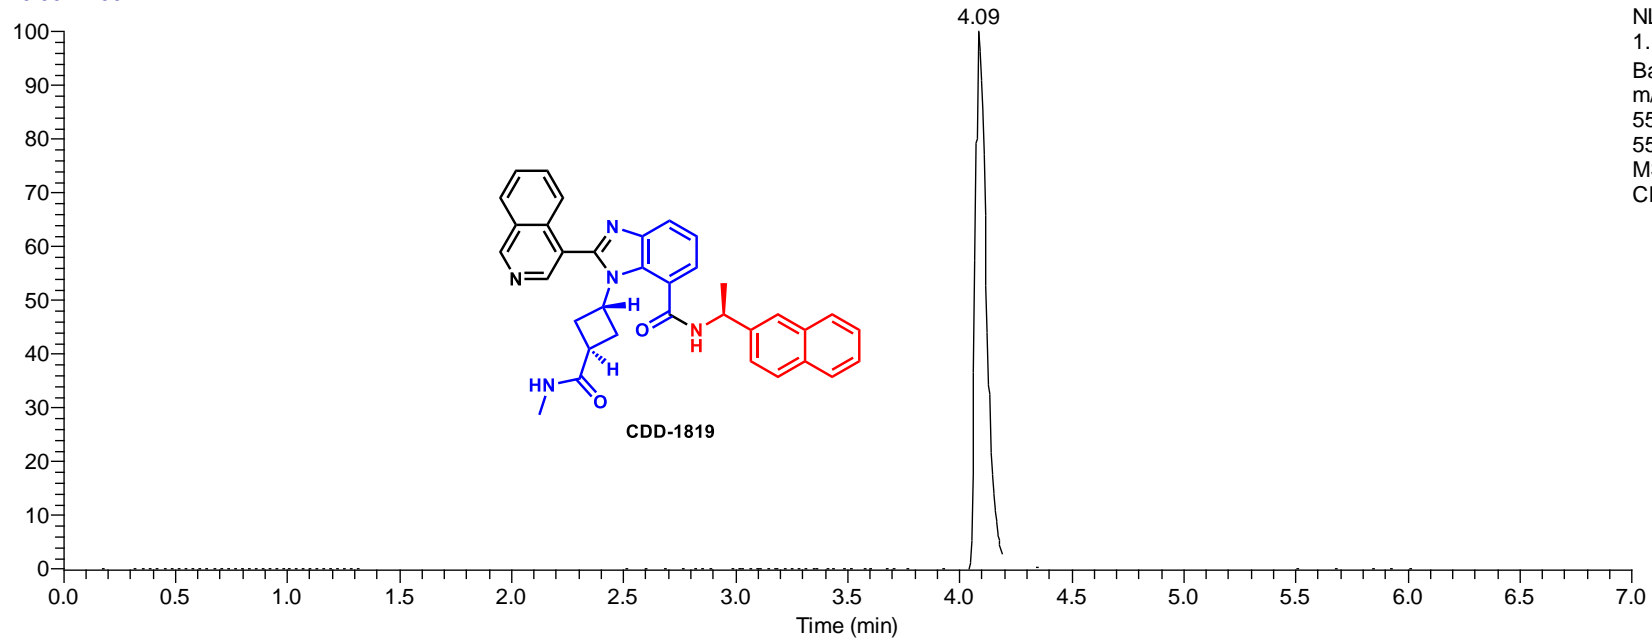

NL:  
1.11E9  
Base Peak  
m/z=  
553.7551-  
554.7551  
MS  
CDD1819

CDD1819 #619 RT: 4.09 AV: 1 NL: 1.10E9  
T: FTMS + p ESI Full ms [100.0000-1000.0000]

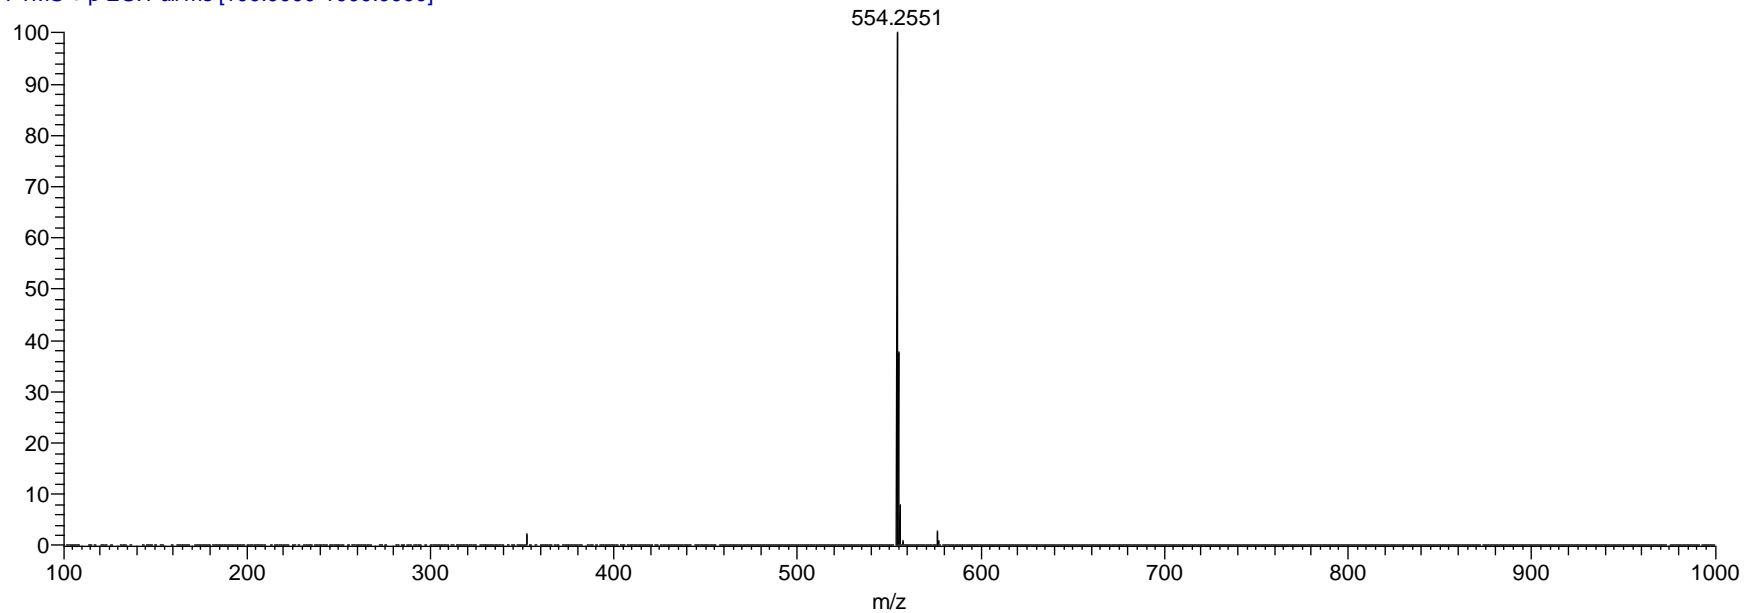

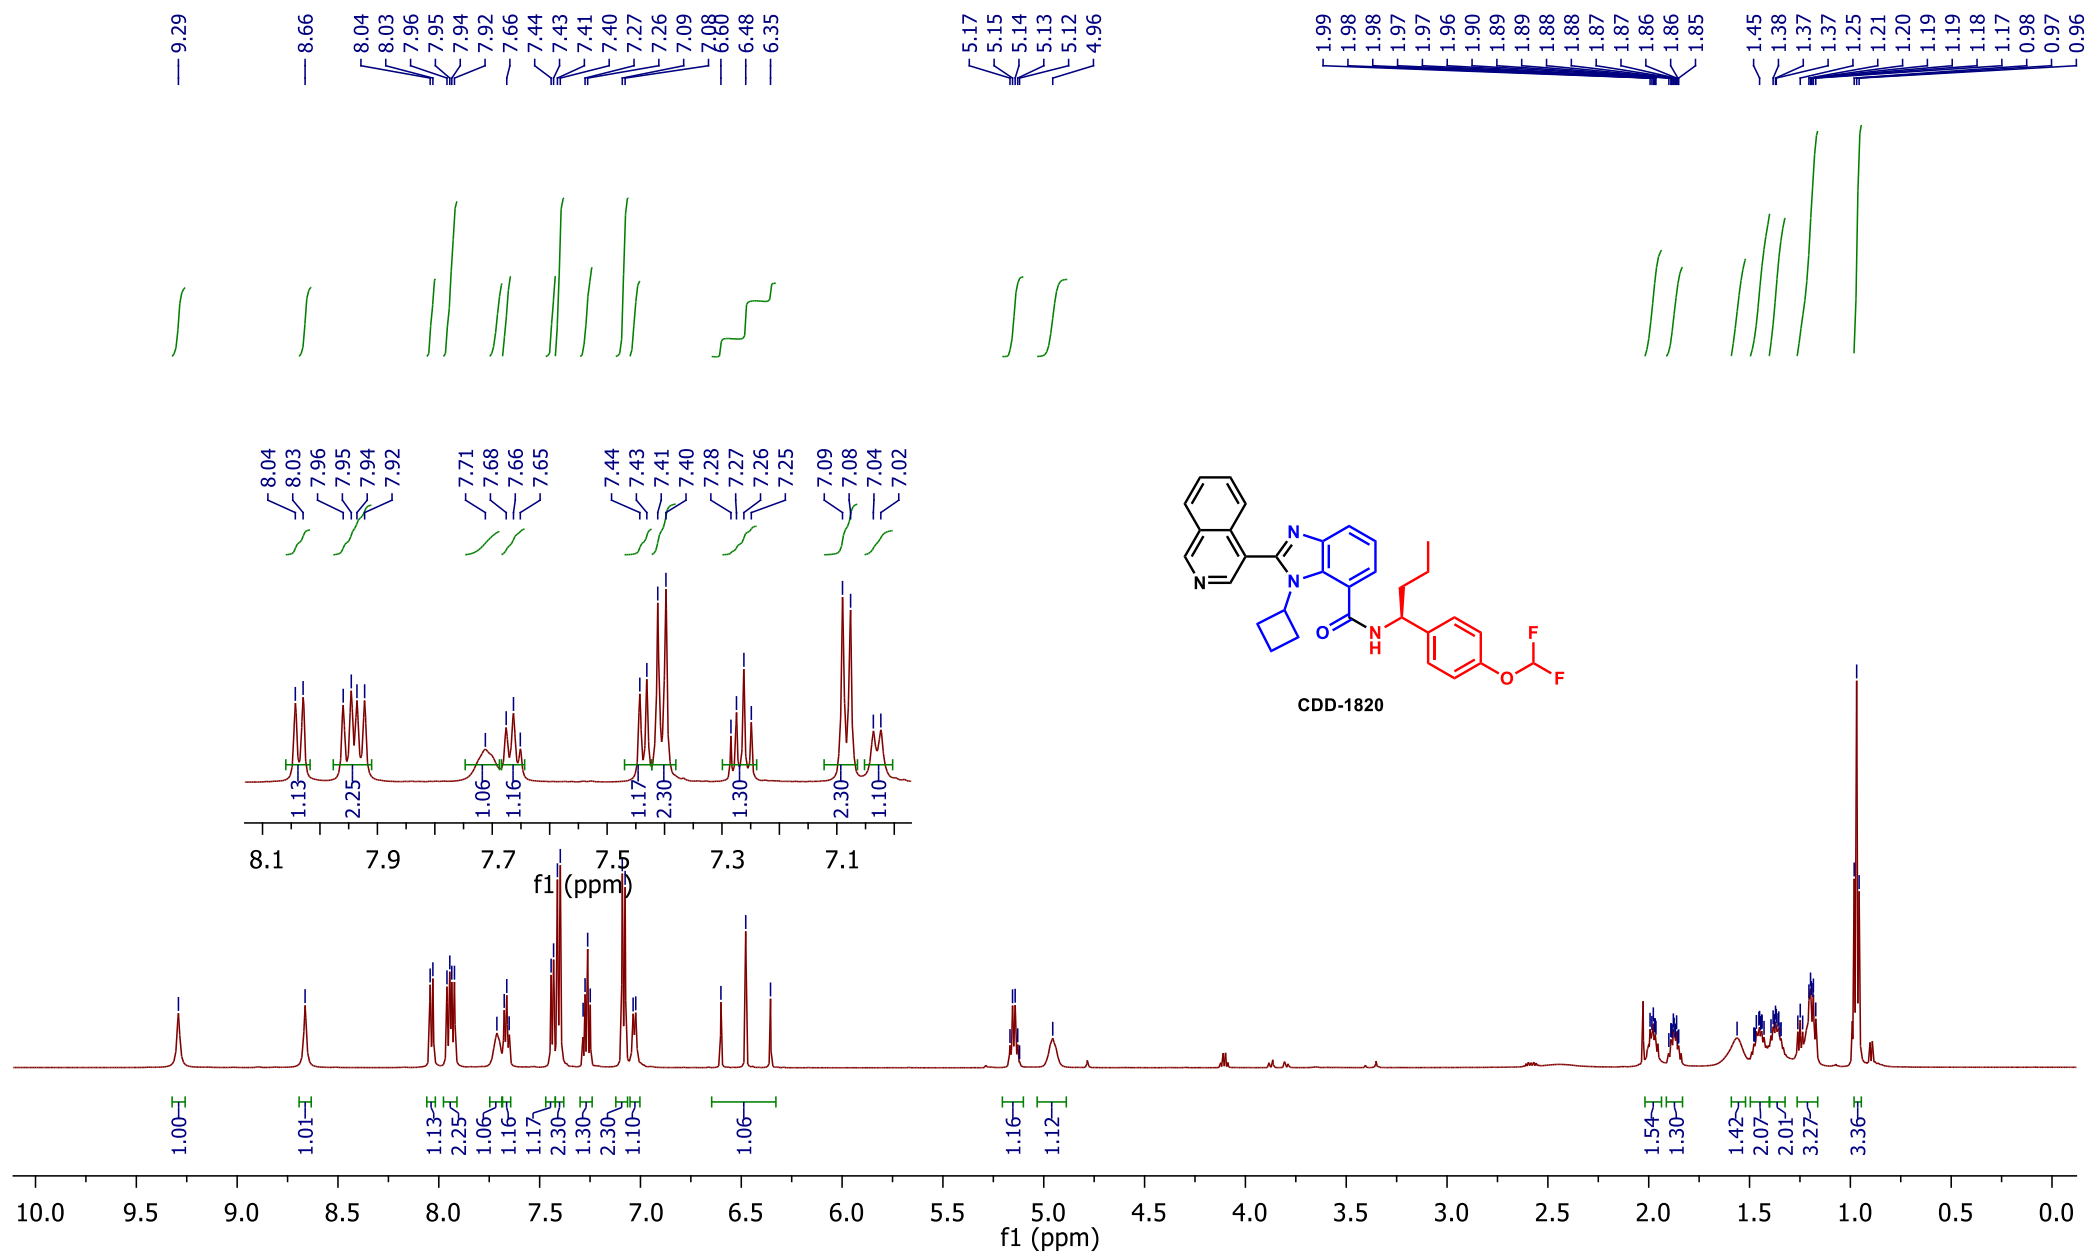

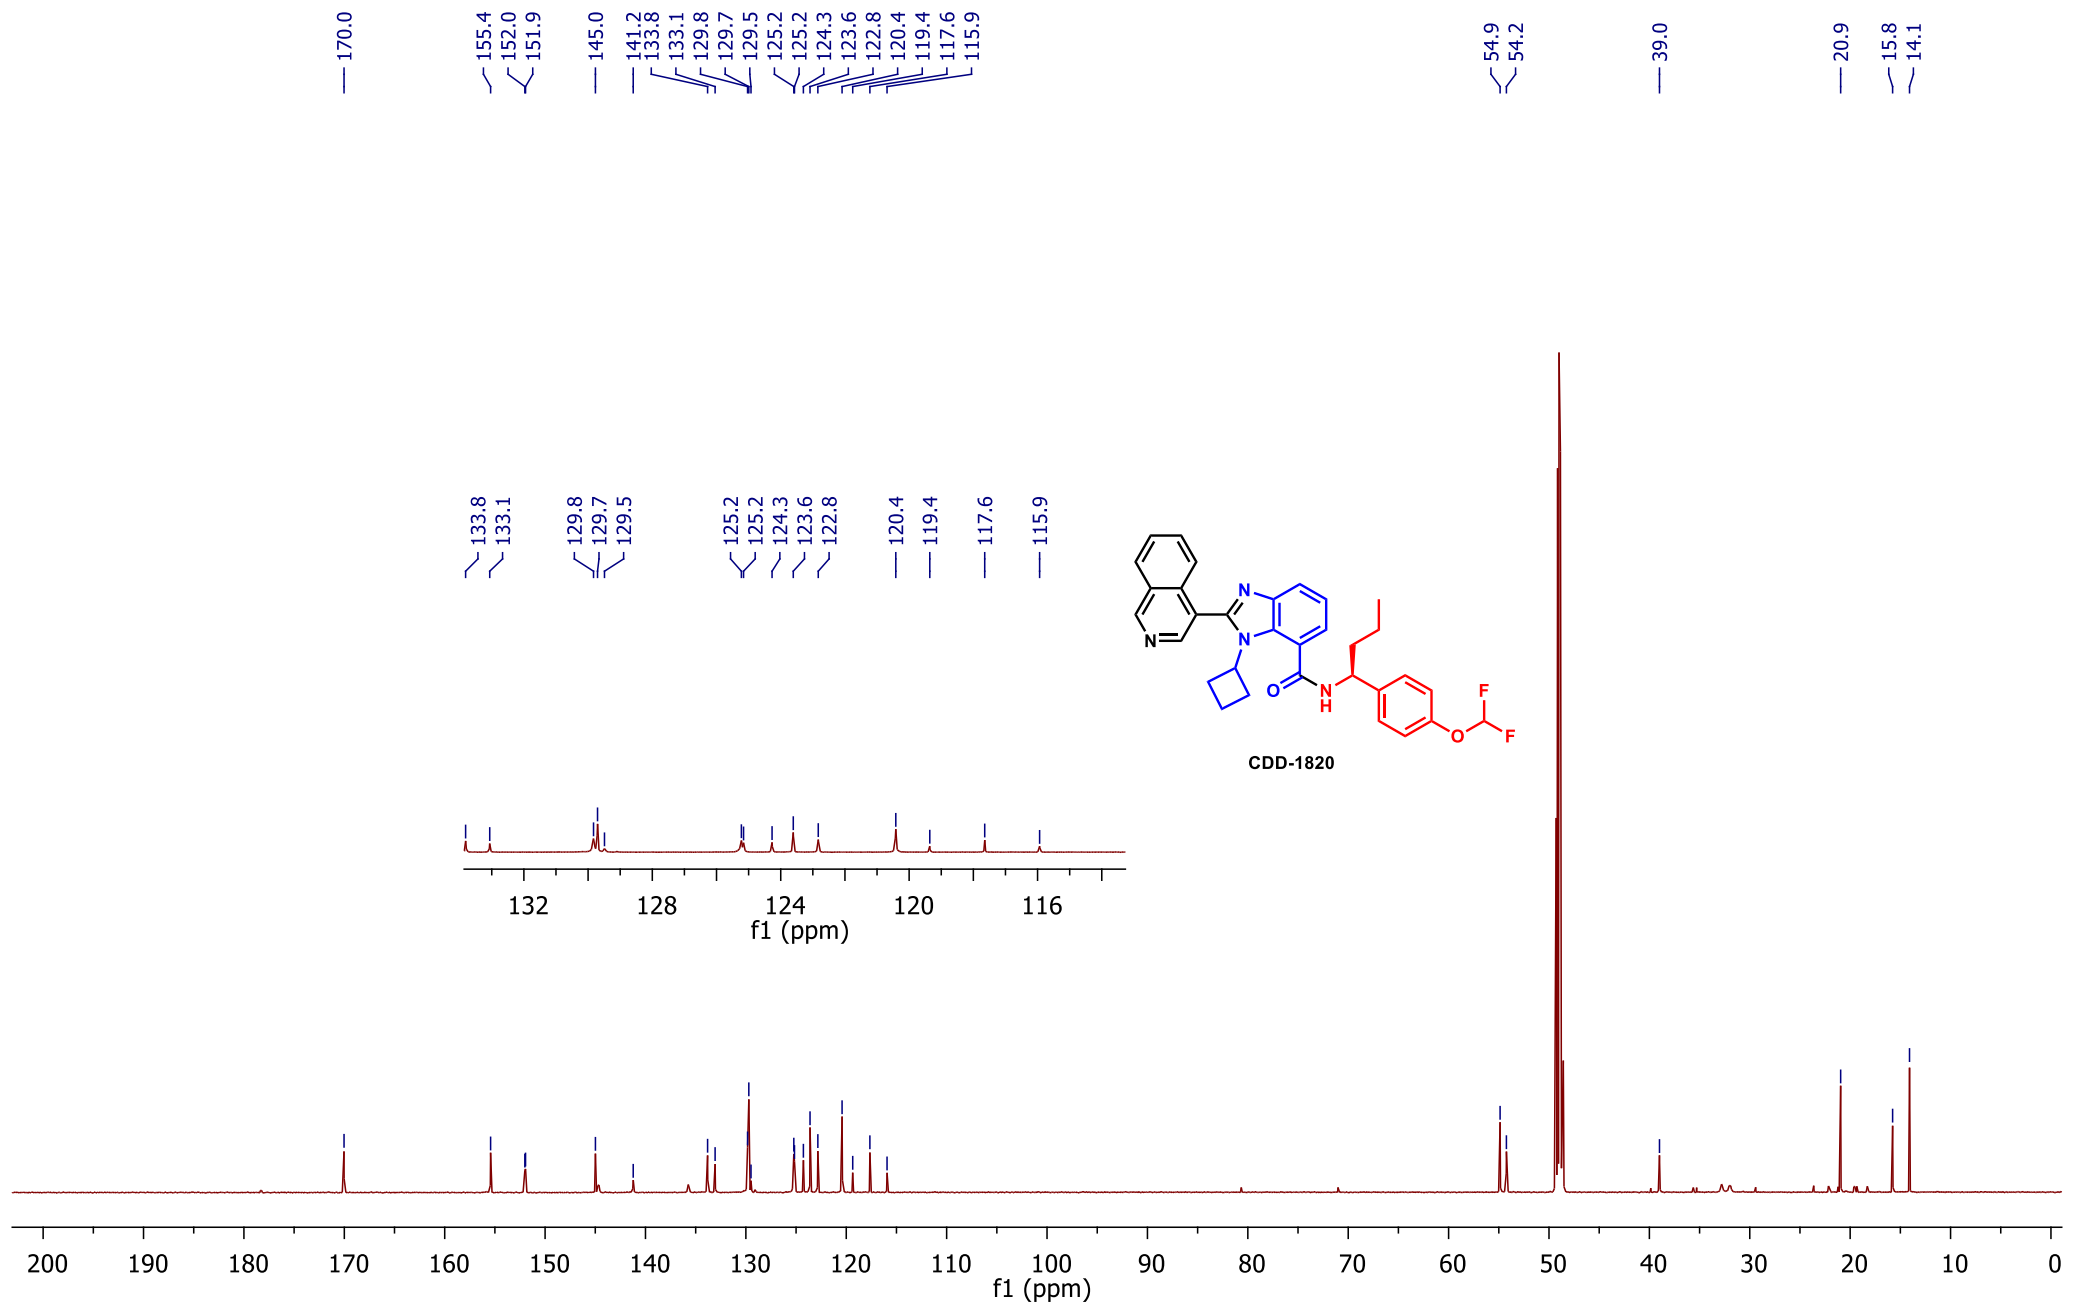

RT: 0.00 - 7.00 SM: 7B

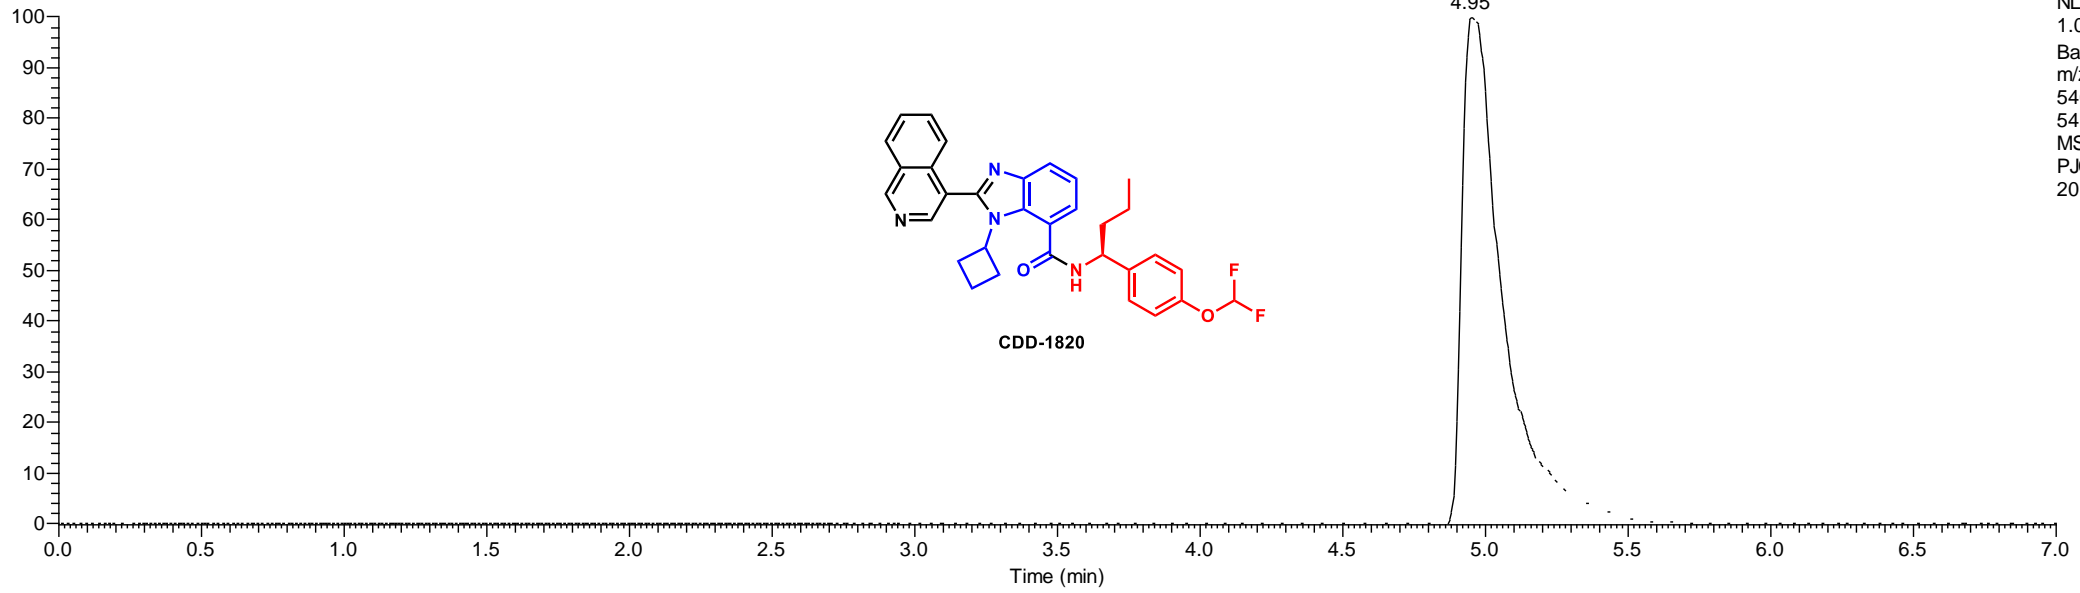

NL:  
1.07E10  
Base Peak  
m/z=  
540.7409-  
541.7409  
MS  
PJC\_CDD18  
20

PJC\_CDD1820 #742 RT: 4.95 AV: 1 NL: 1.02E10  
T: FTMS + p ESI Full ms [100.0000-1000.0000]

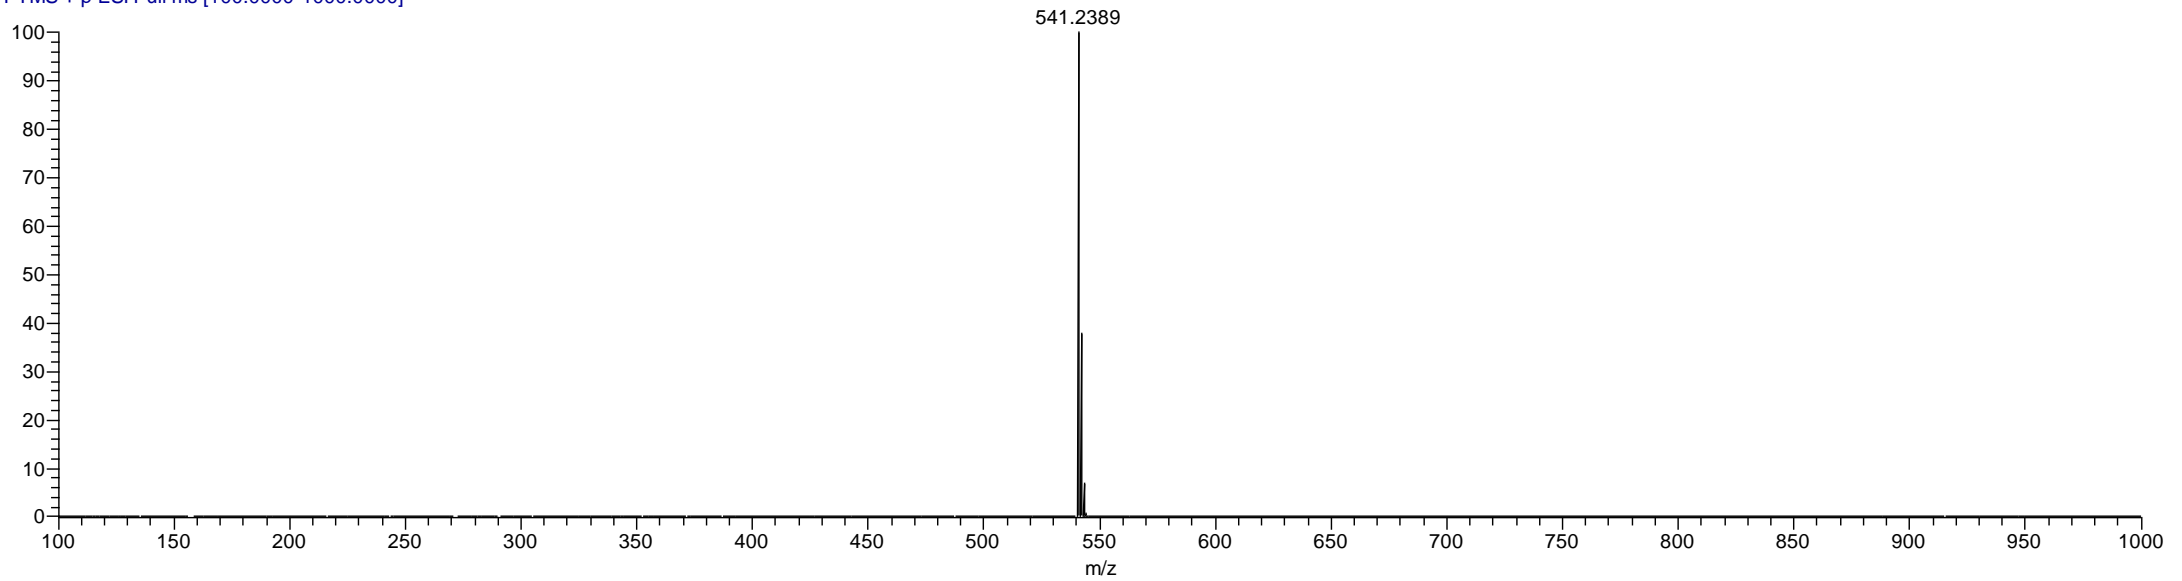

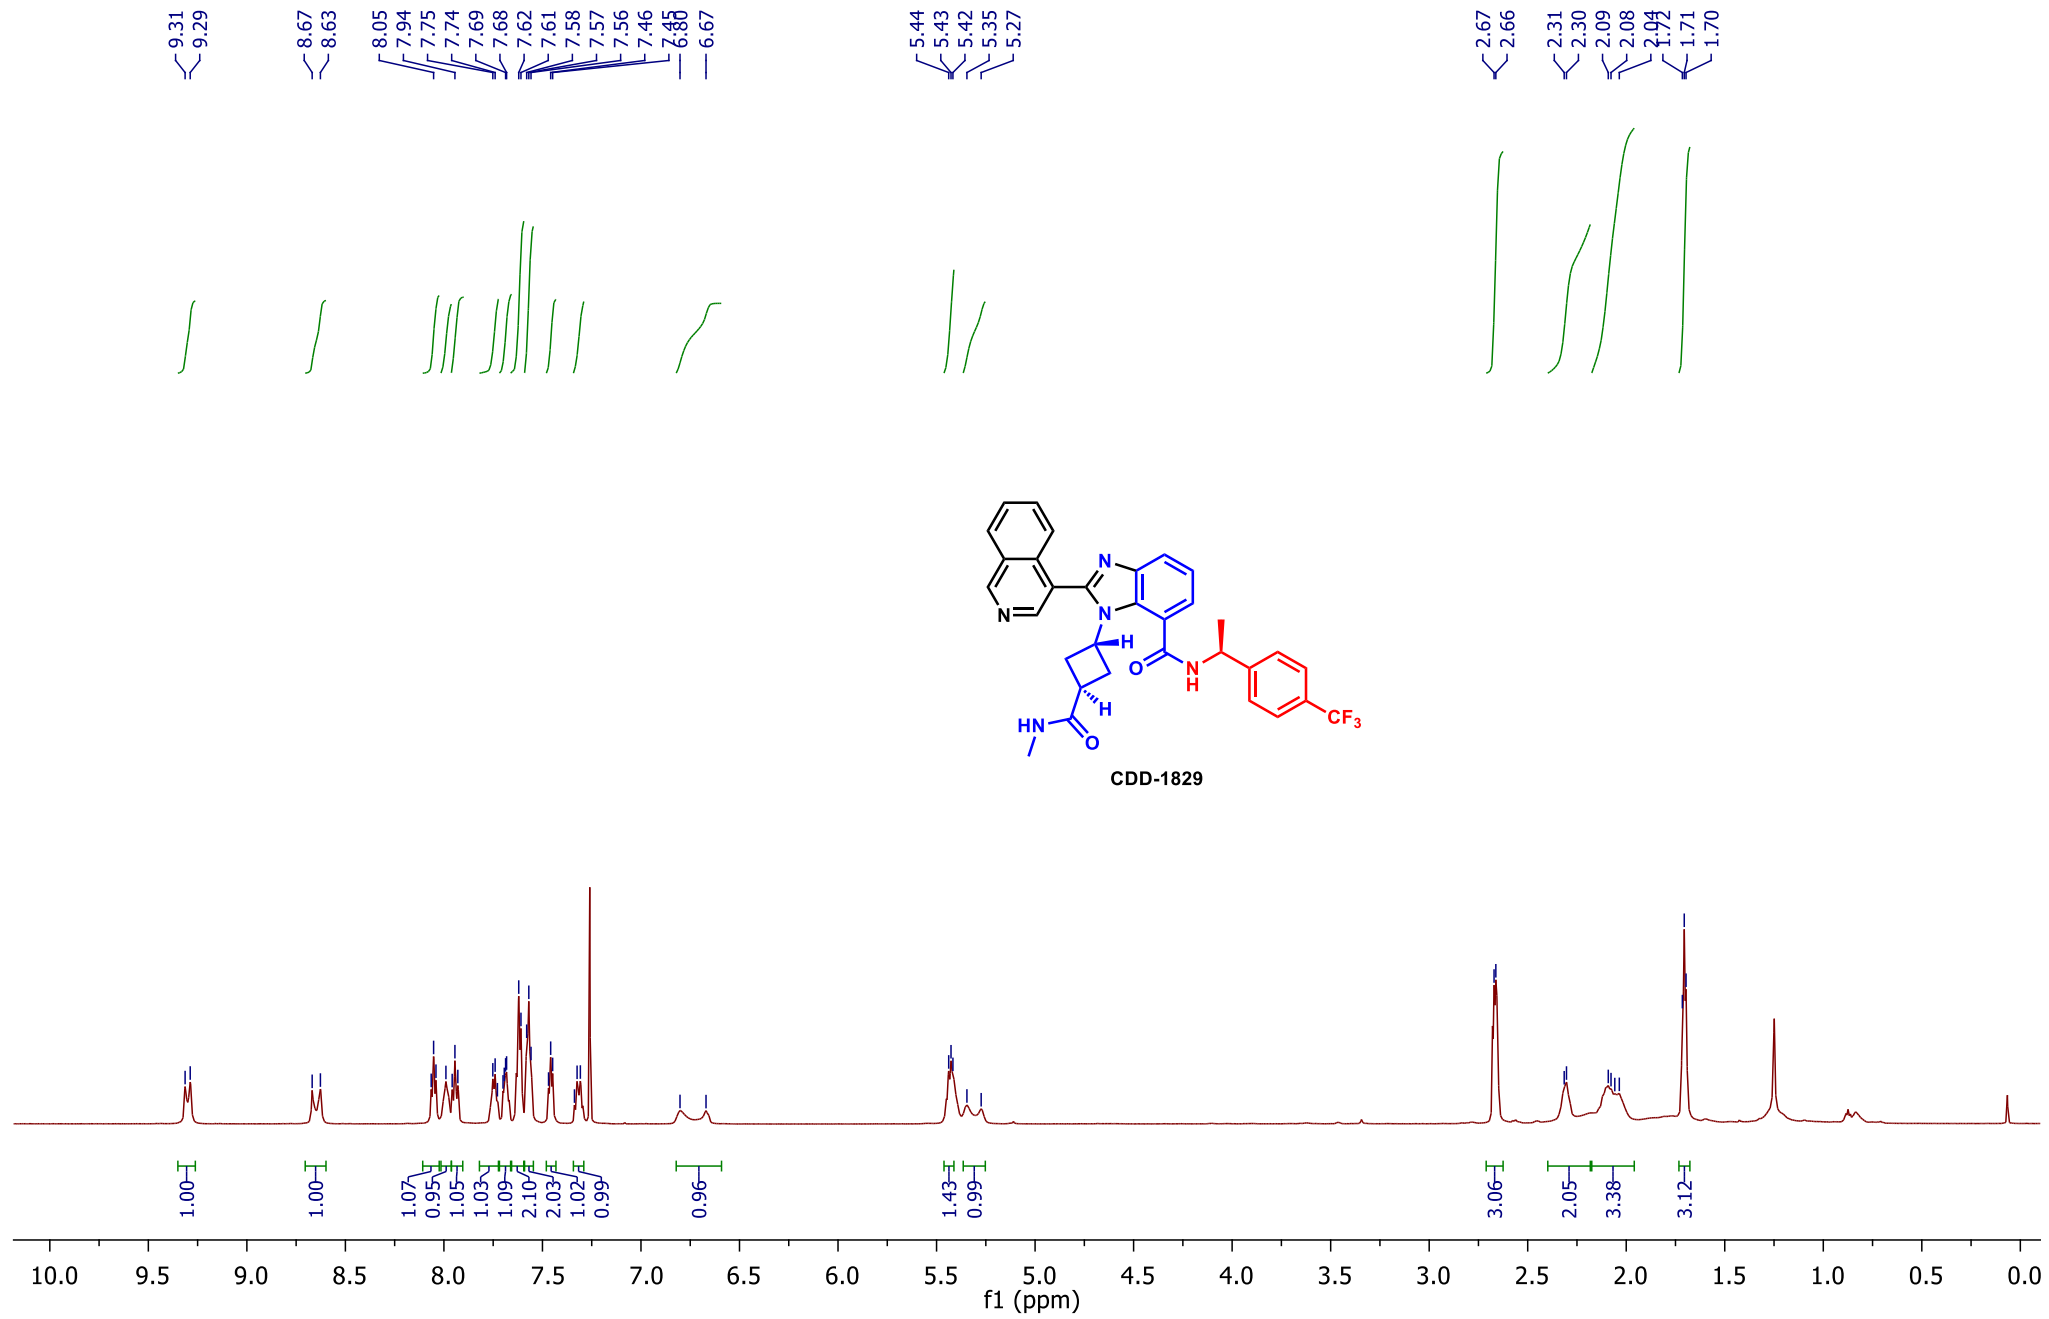



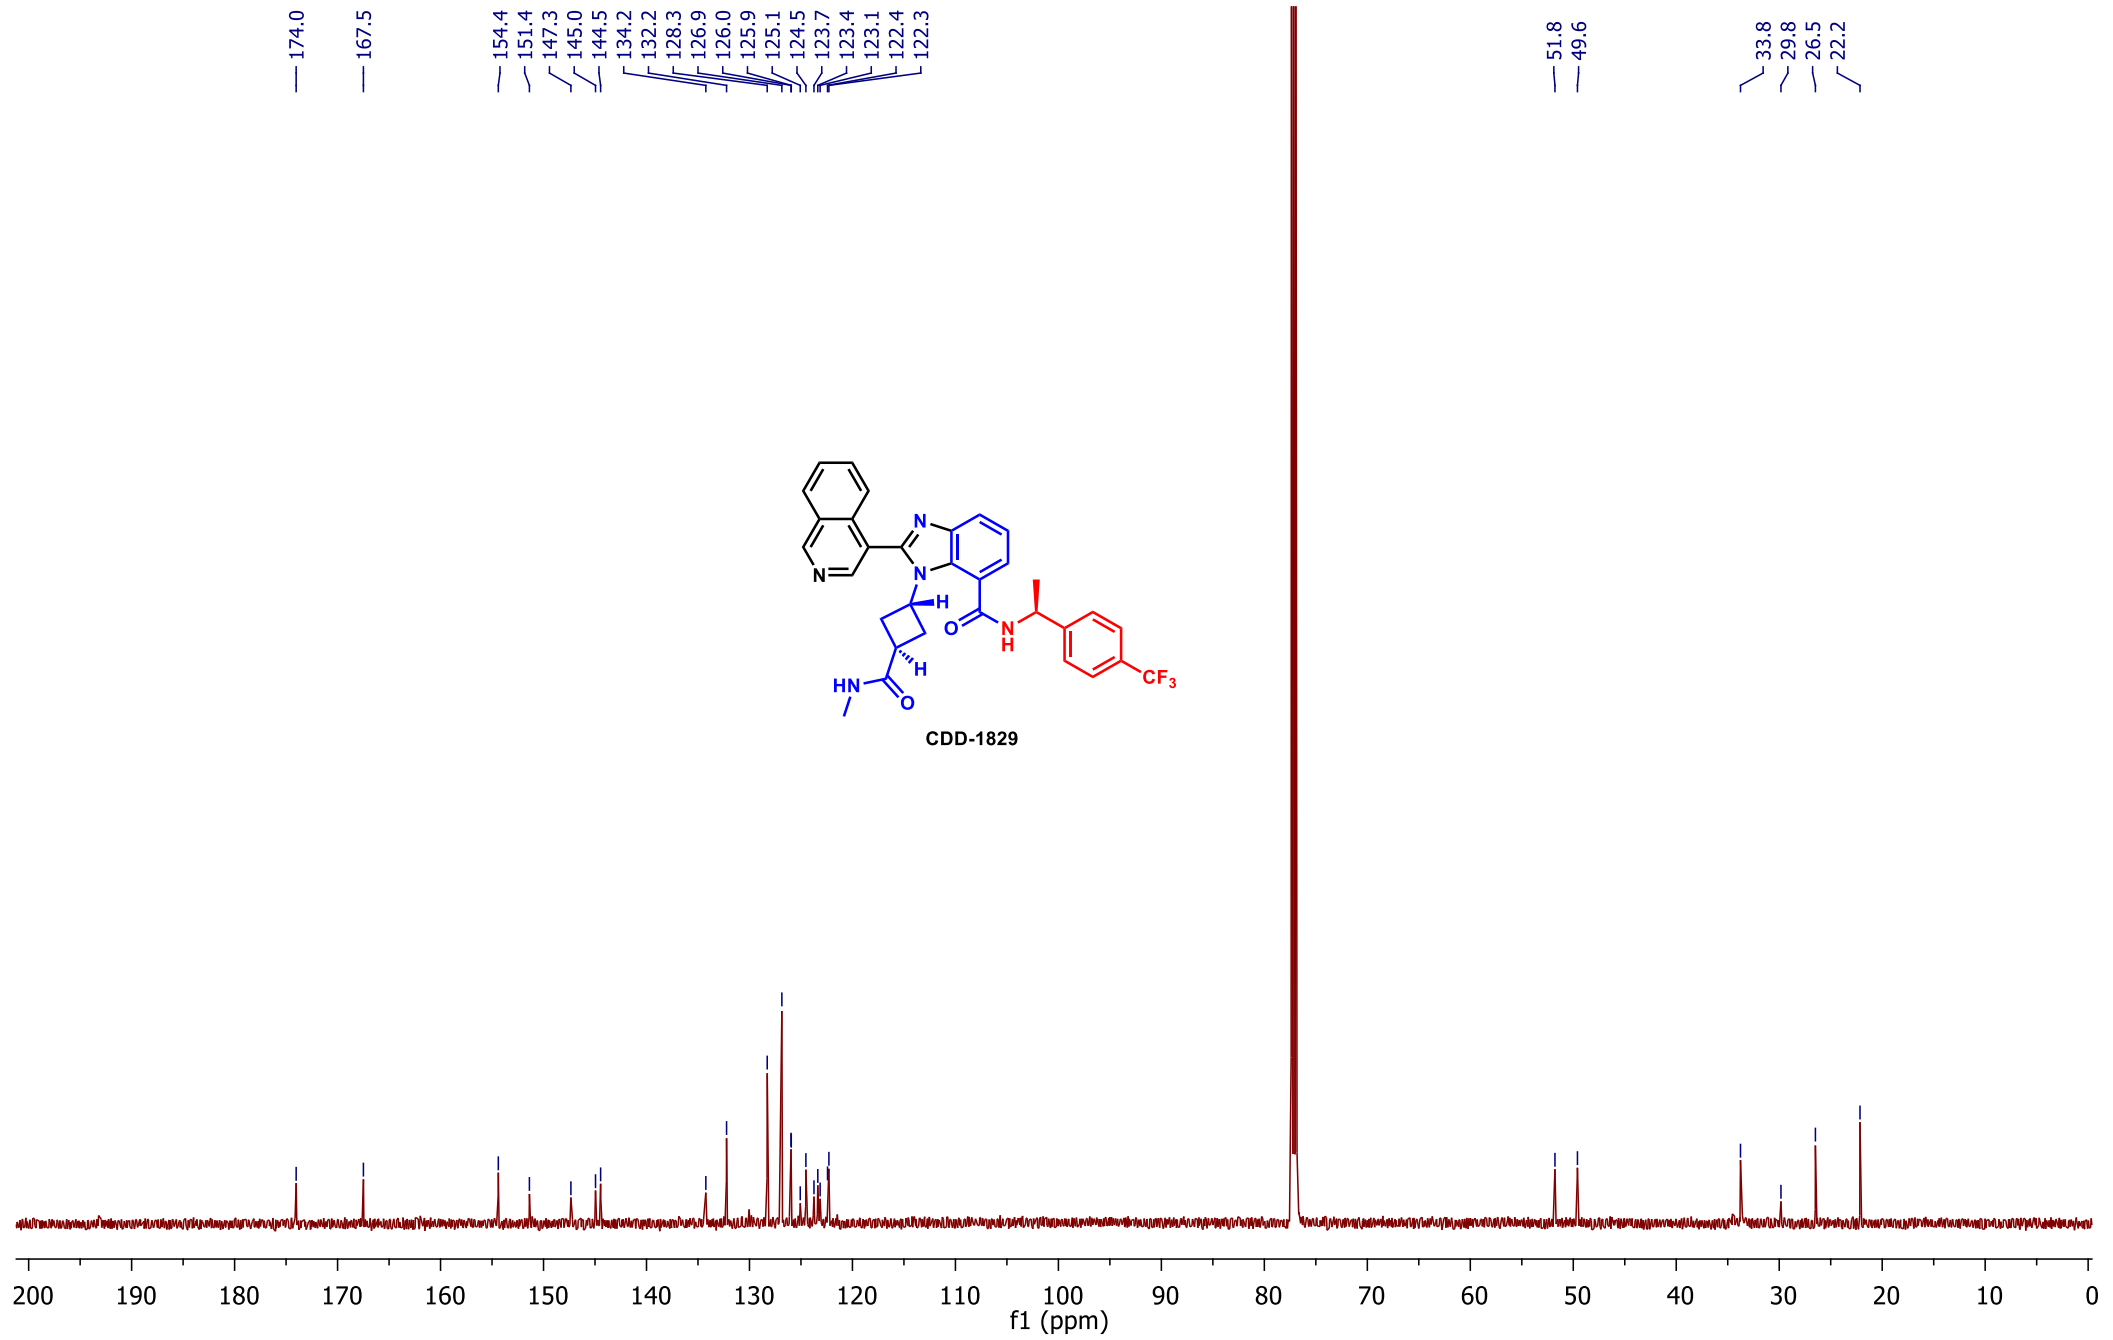

RT: 0.00 - 7.00

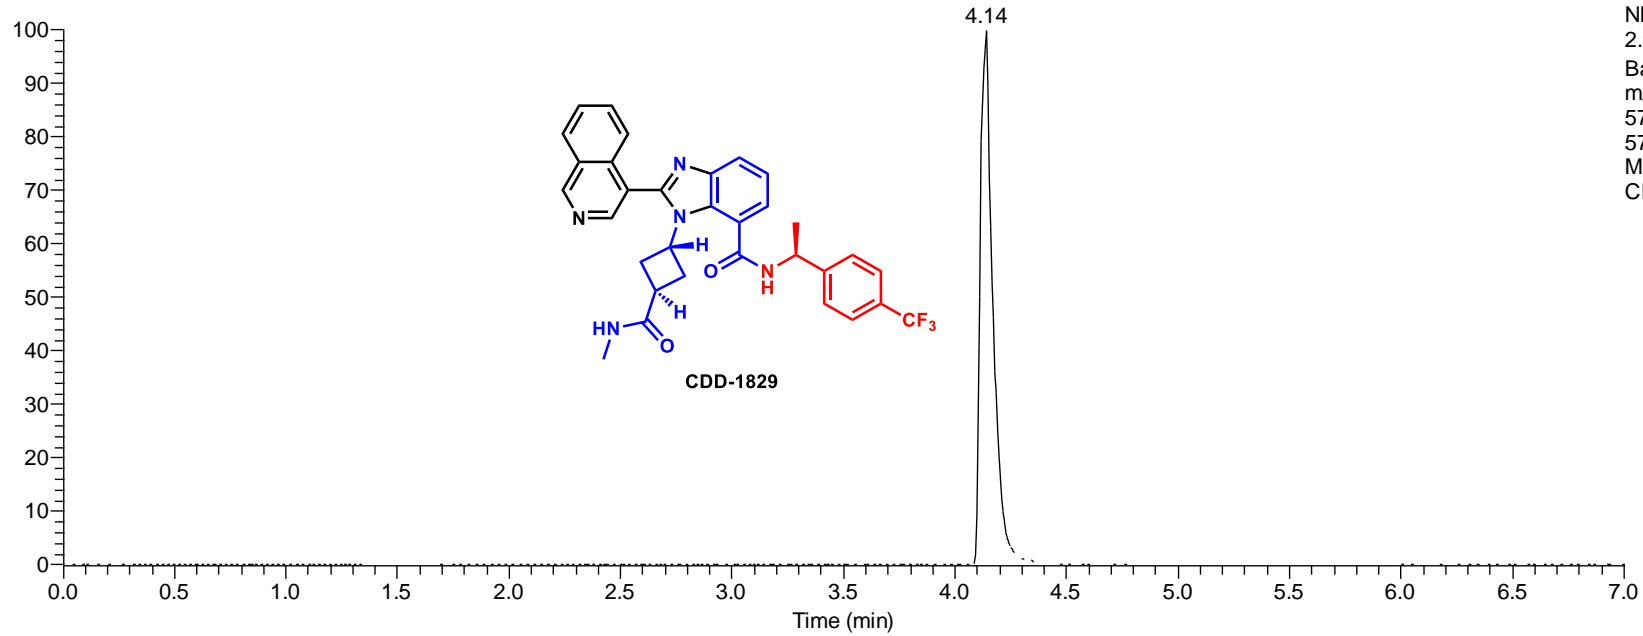

NL:  
2.97E9  
Base Peak  
m/z=  
571.7268-  
572.7268  
MS  
CDD1829

CDD1829 #534 RT: 4.14 AV: 1 NL: 2.89E9  
T: FTMS + p ESI Full ms [100.0000-1000.0000]

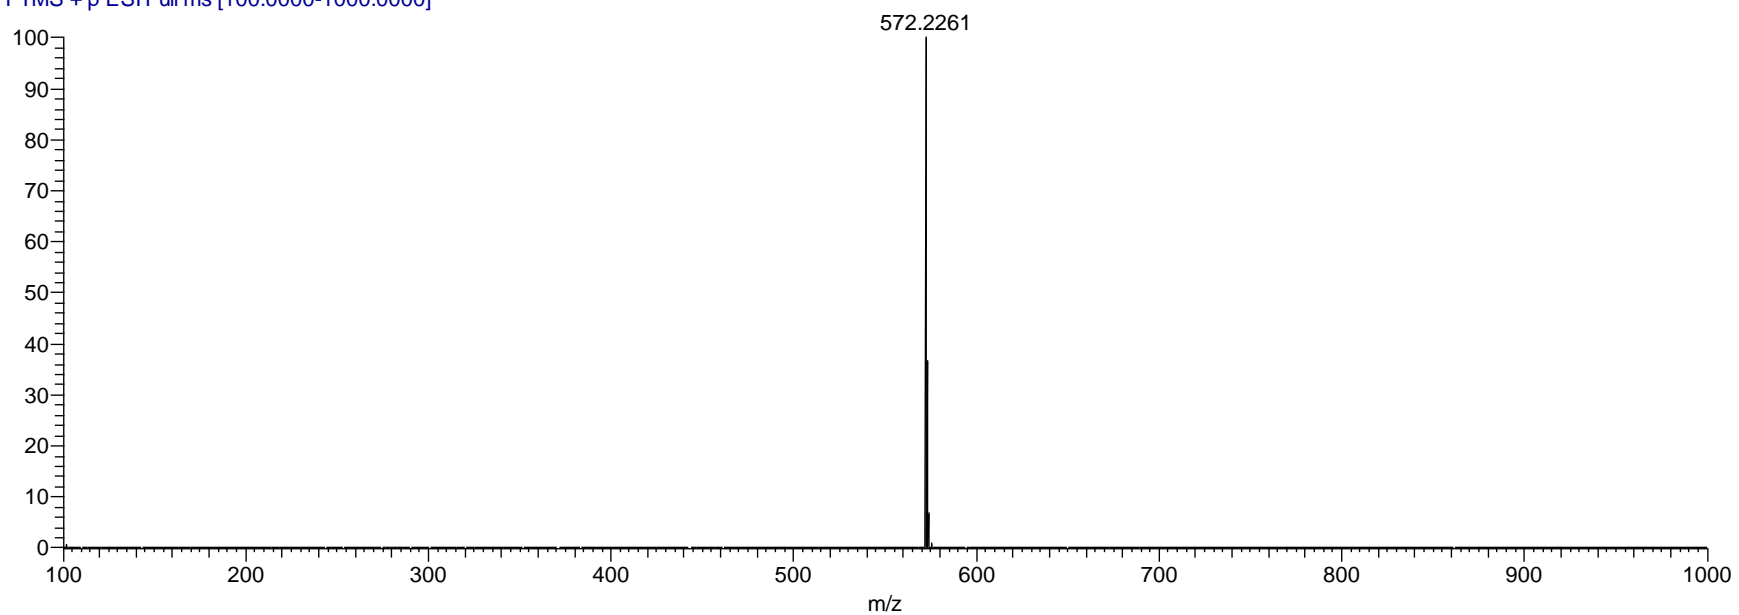

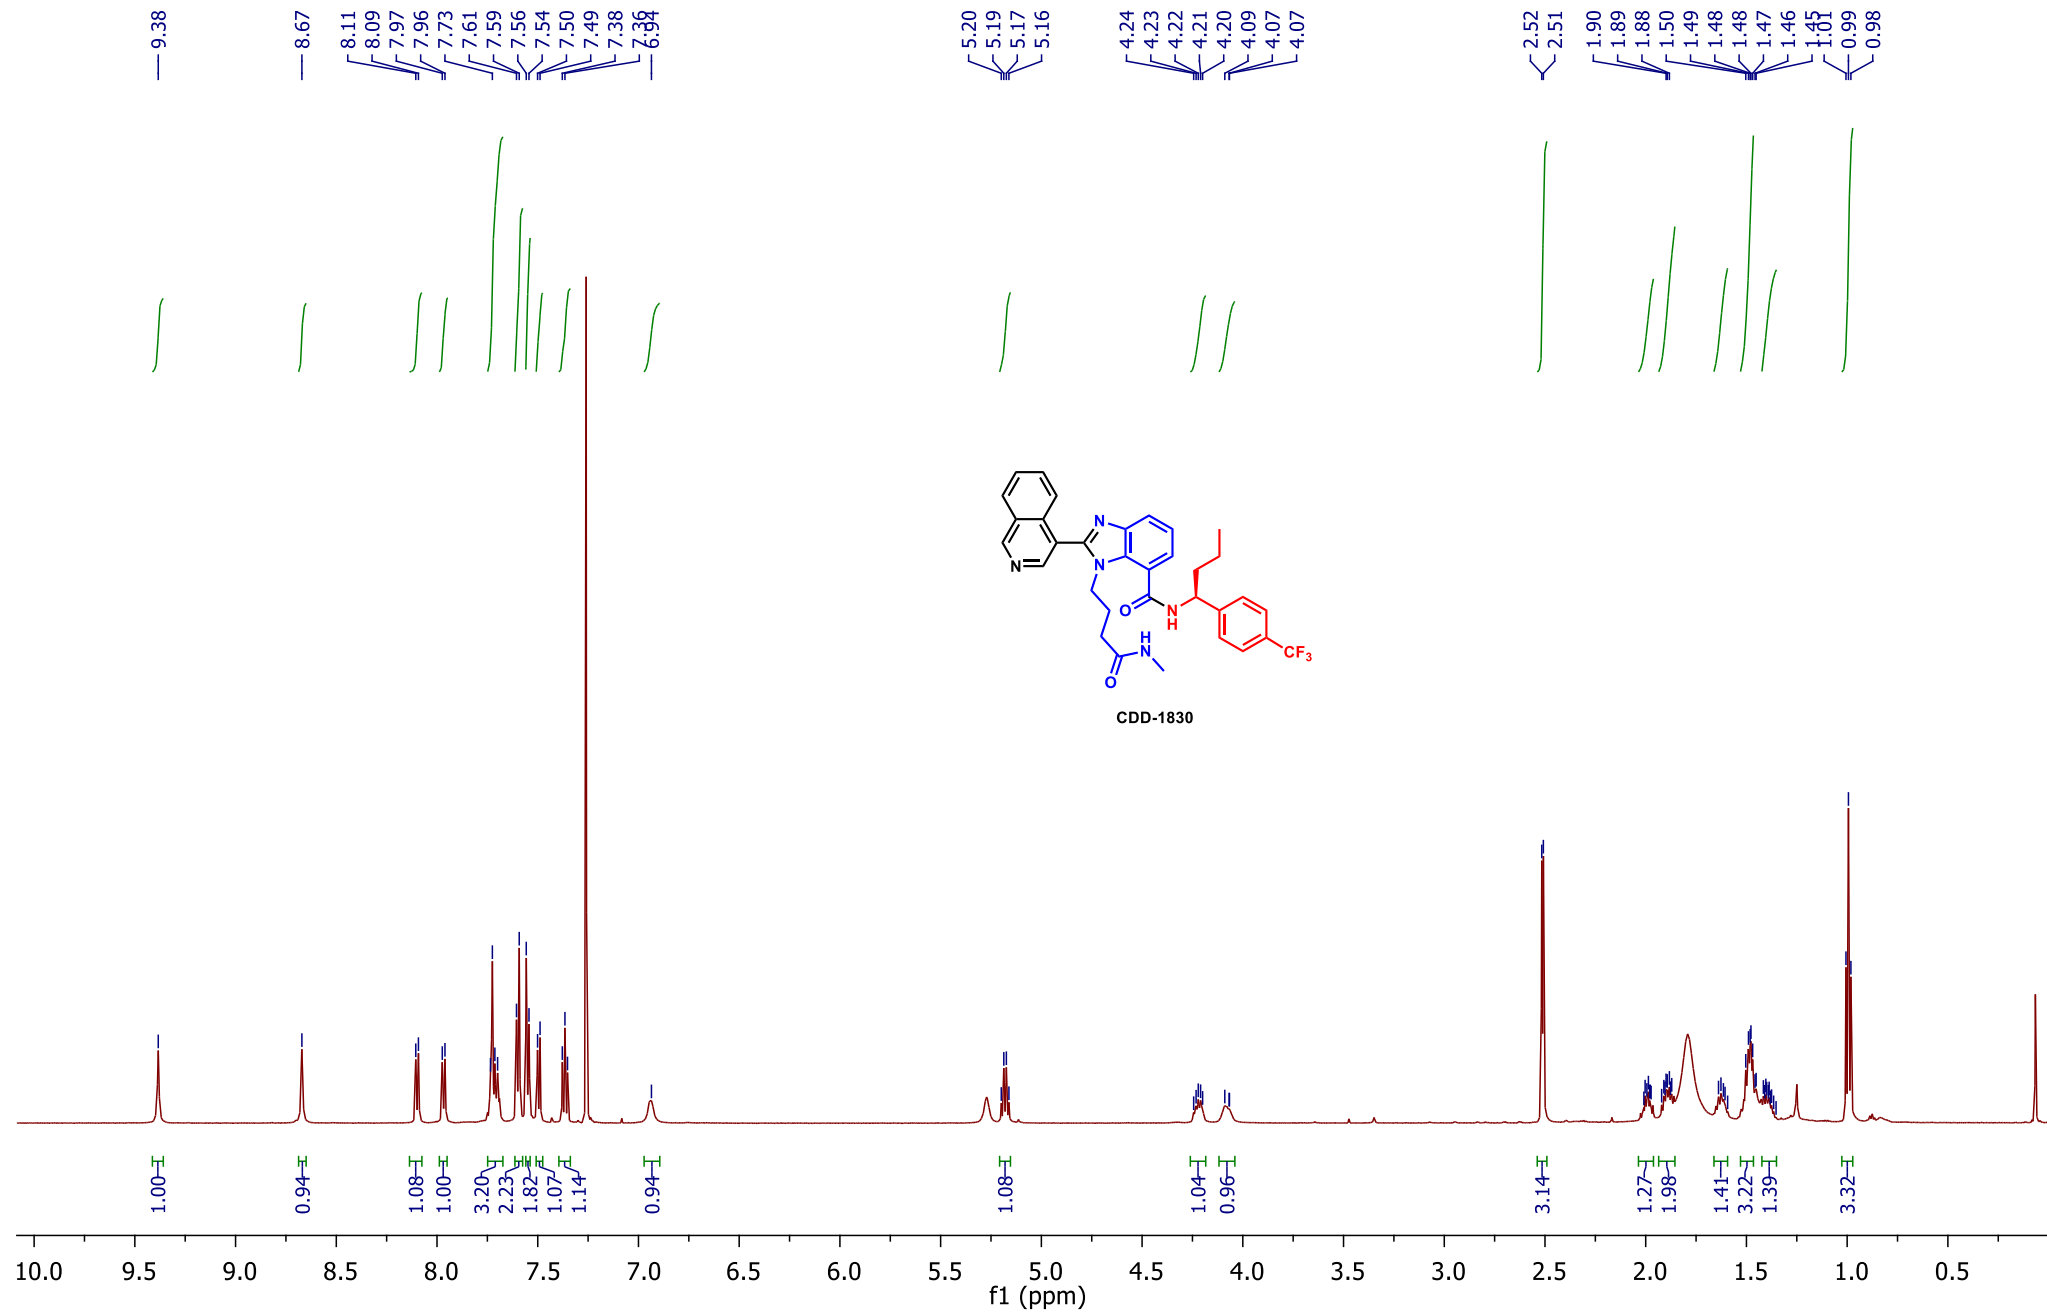

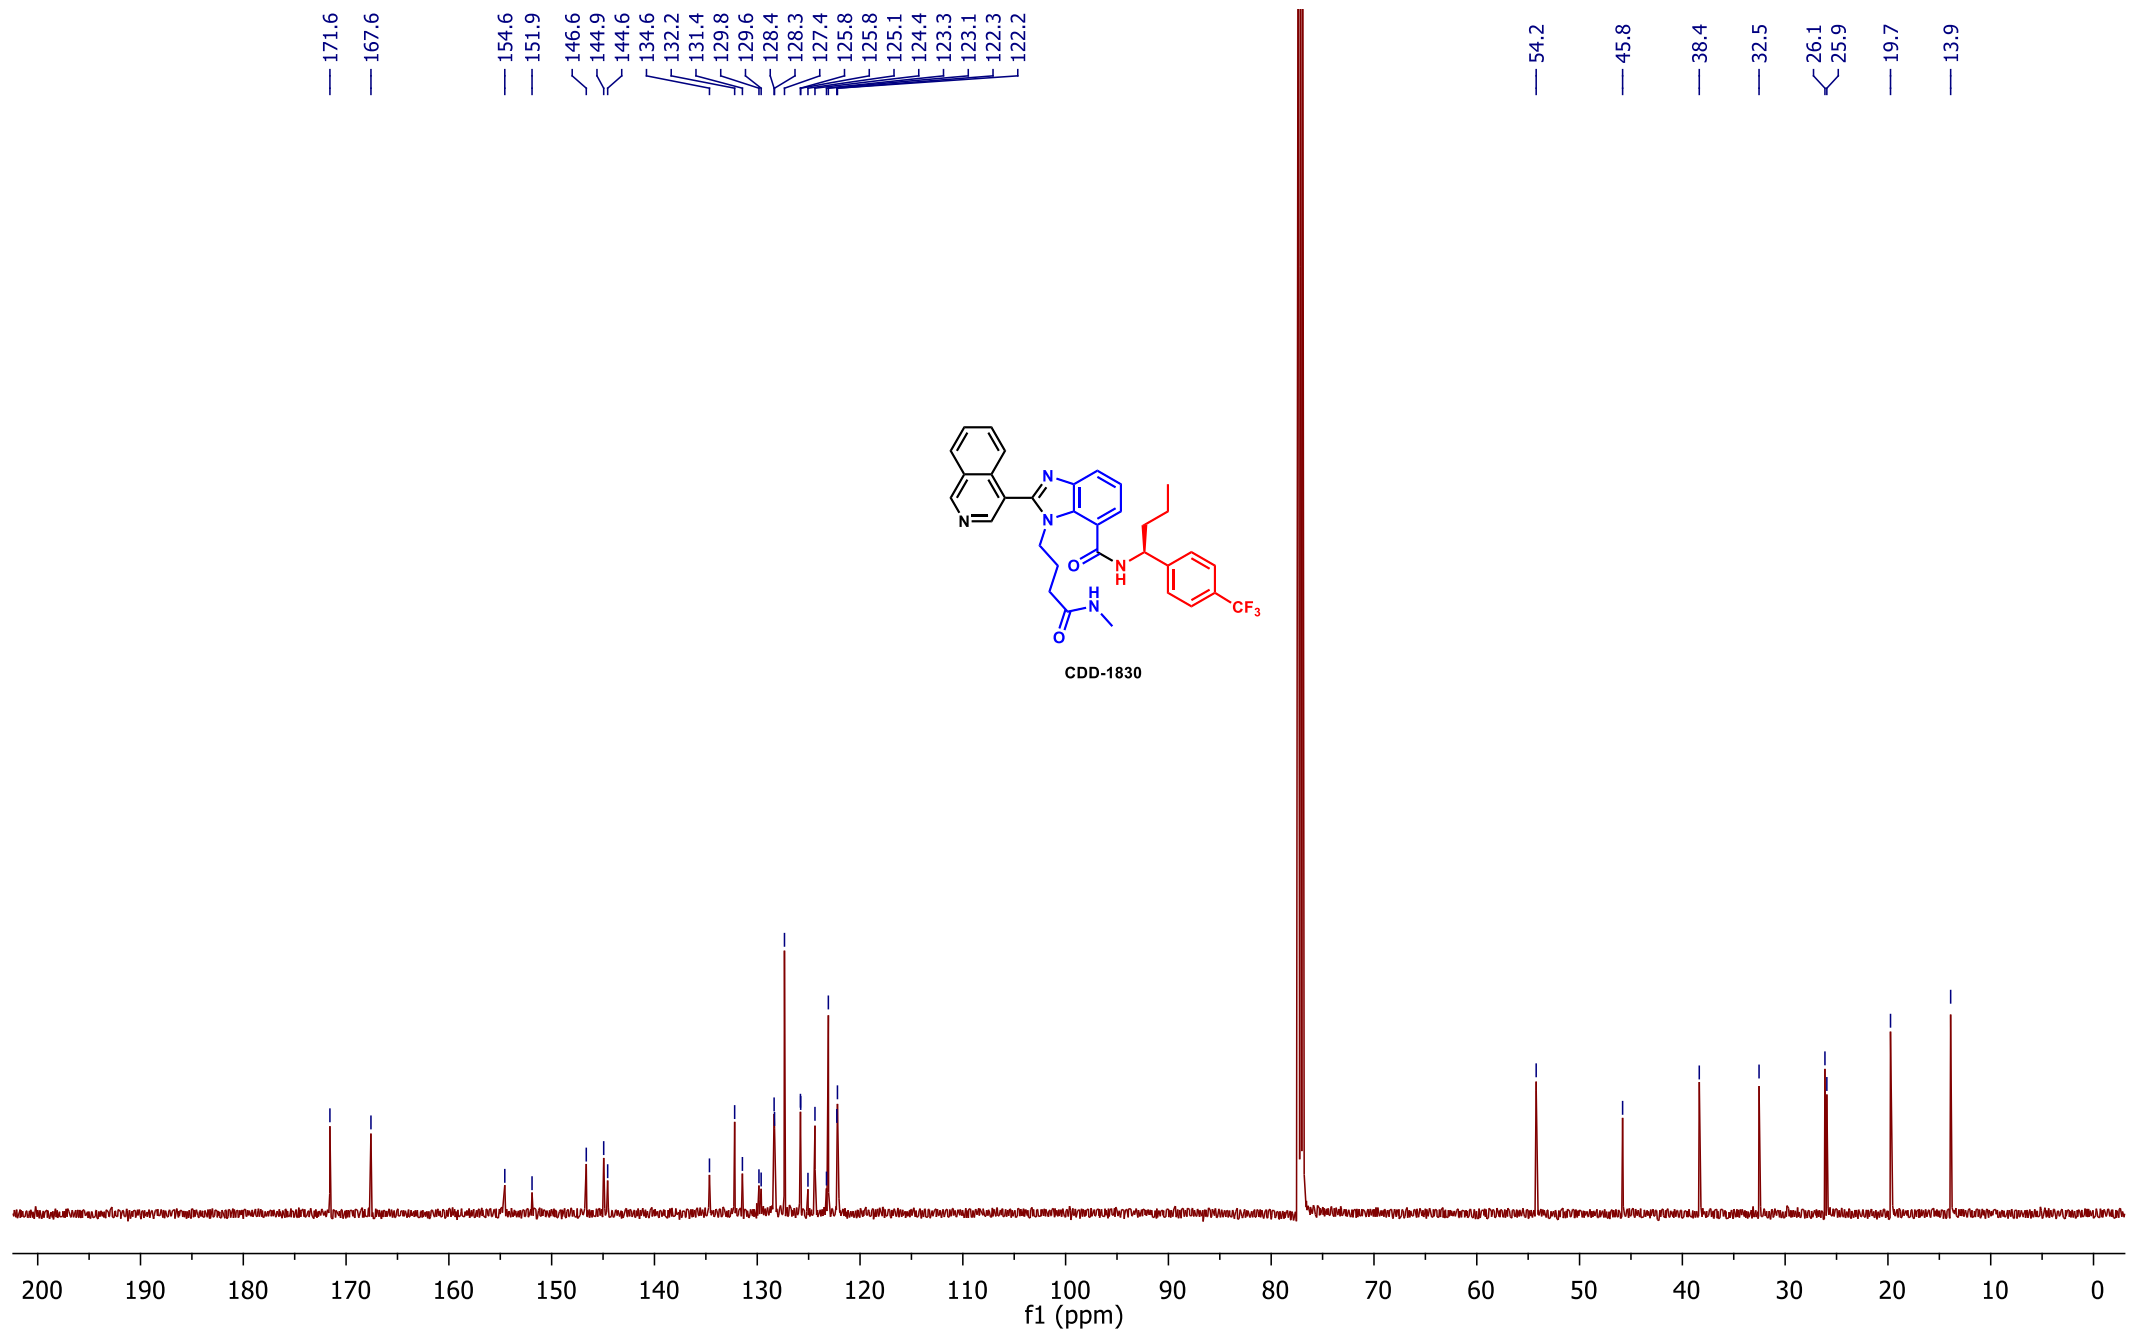

RT: 0.00 - 7.00

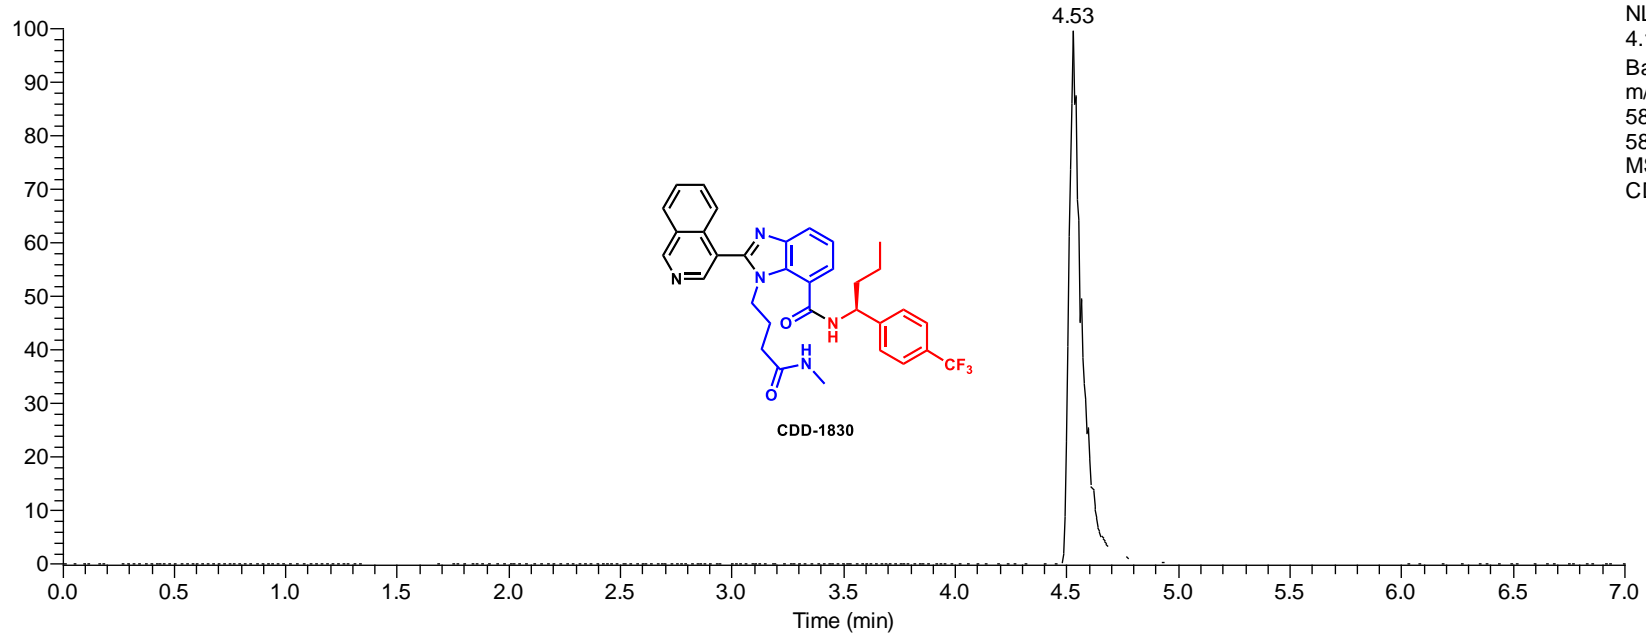

NL:  
4.17E9  
Base Peak  
m/z=  
587.7581-  
588.7581  
MS  
CDD1830

CDD1830 #584 RT: 4.53 AV: 1 NL: 3.95E9  
T: FTMS + p ESI Full ms [100.0000-1000.0000]

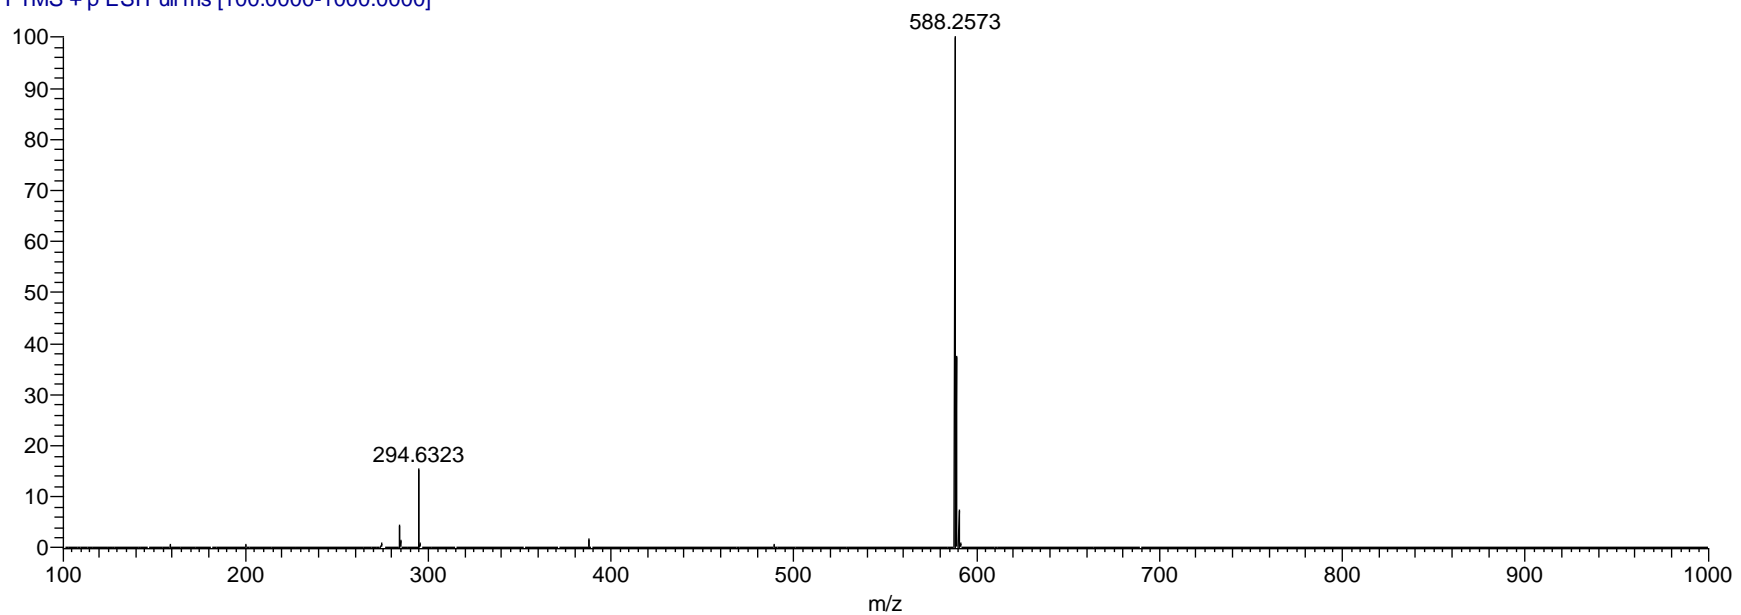

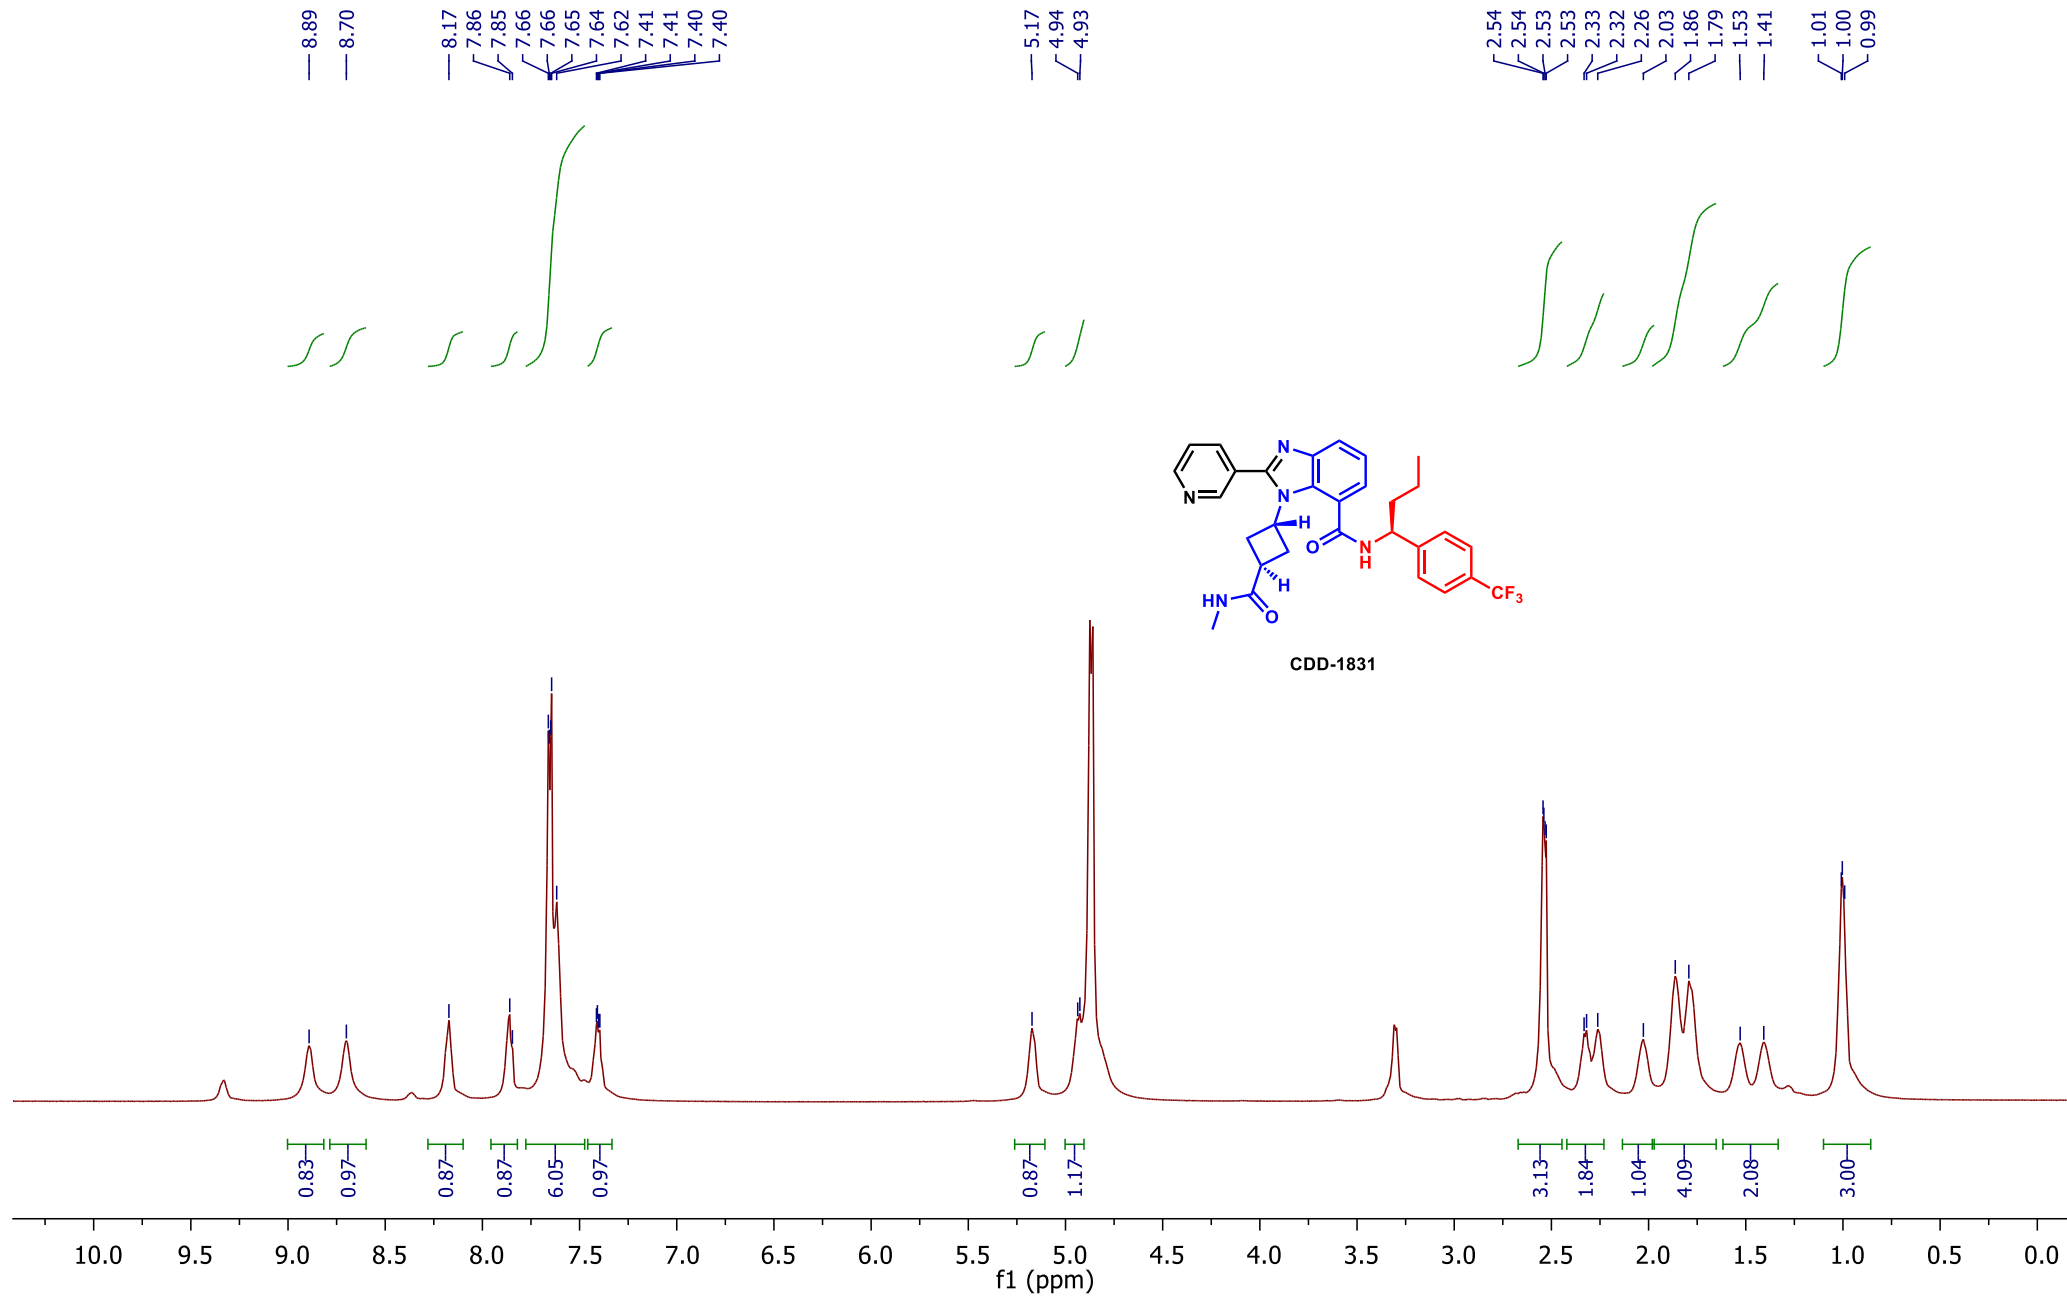

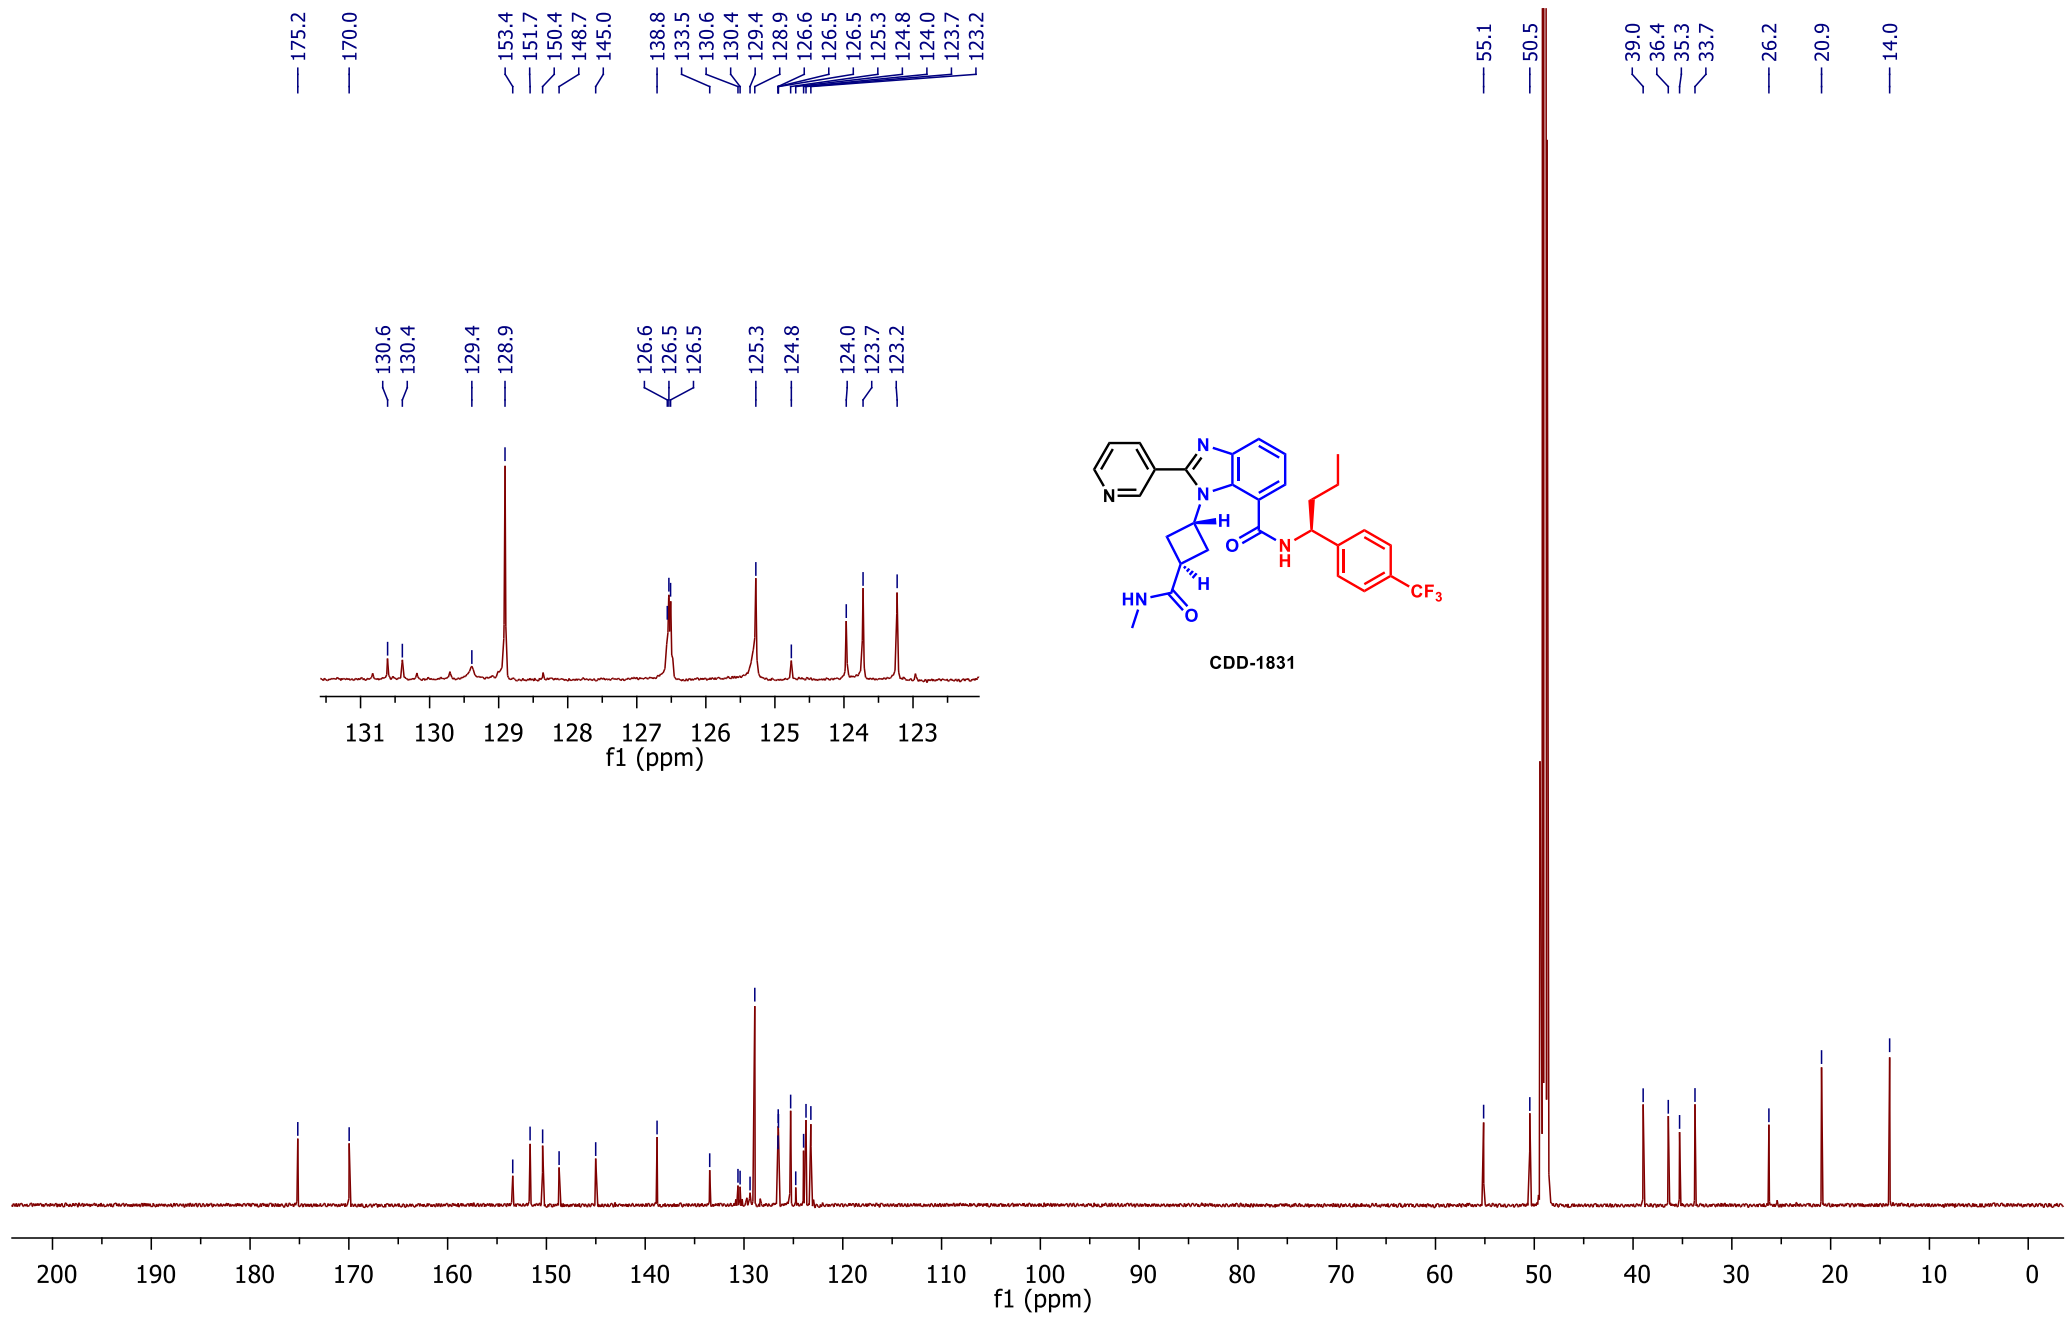

RT: 0.00 - 7.00 SM: 7B

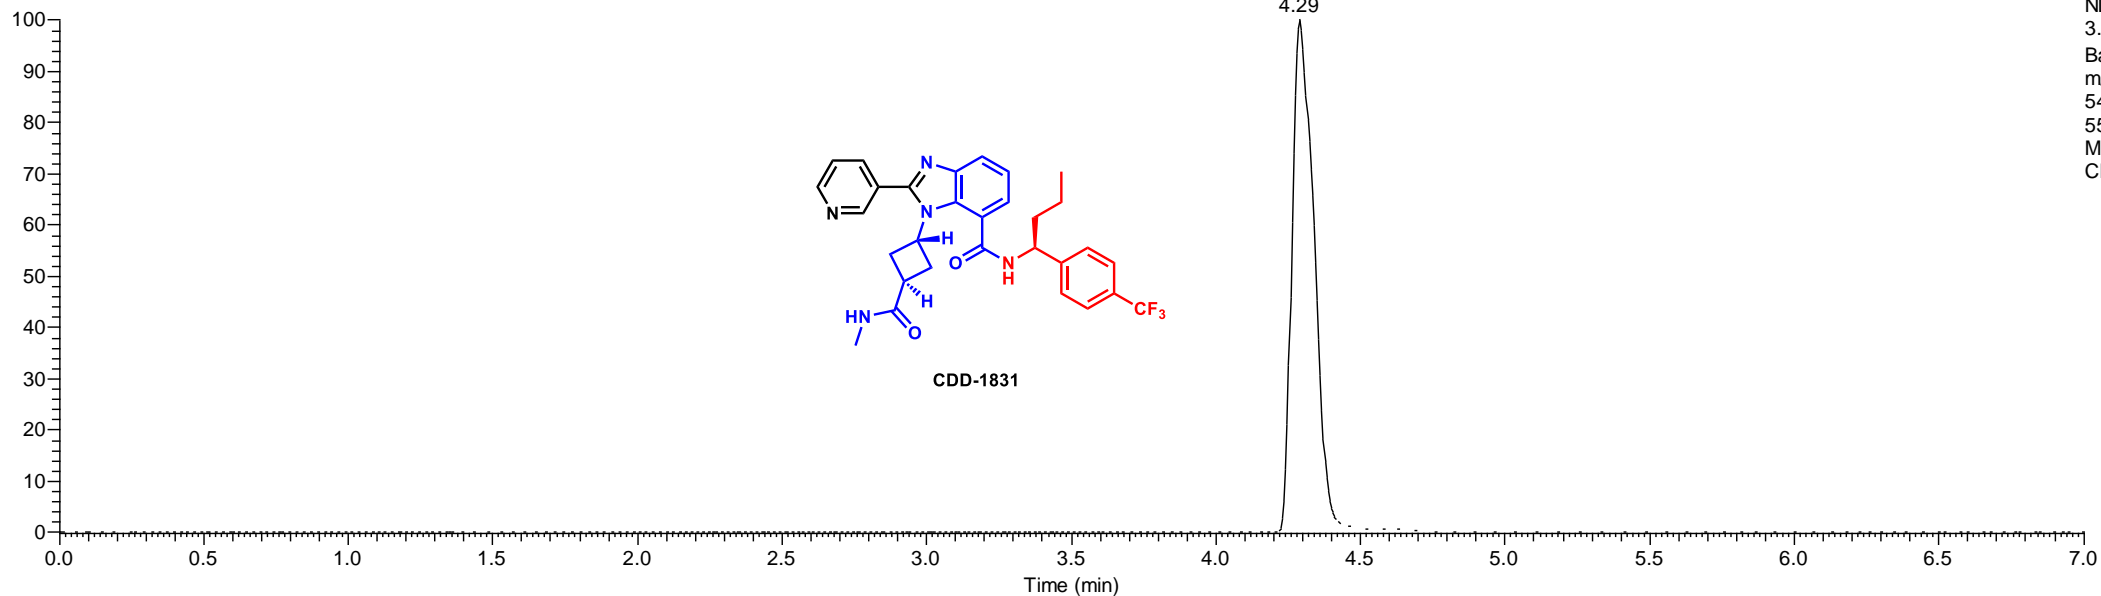

NL:  
3.56E9  
Base Peak  
m/z=  
549.7424-  
550.7424  
MS  
CDD1831

CDD1831 #668 RT: 4.29 AV: 1 NL: 3.64E9  
T: FTMS + p ESI Full lock ms [100.0000-1000.0000]

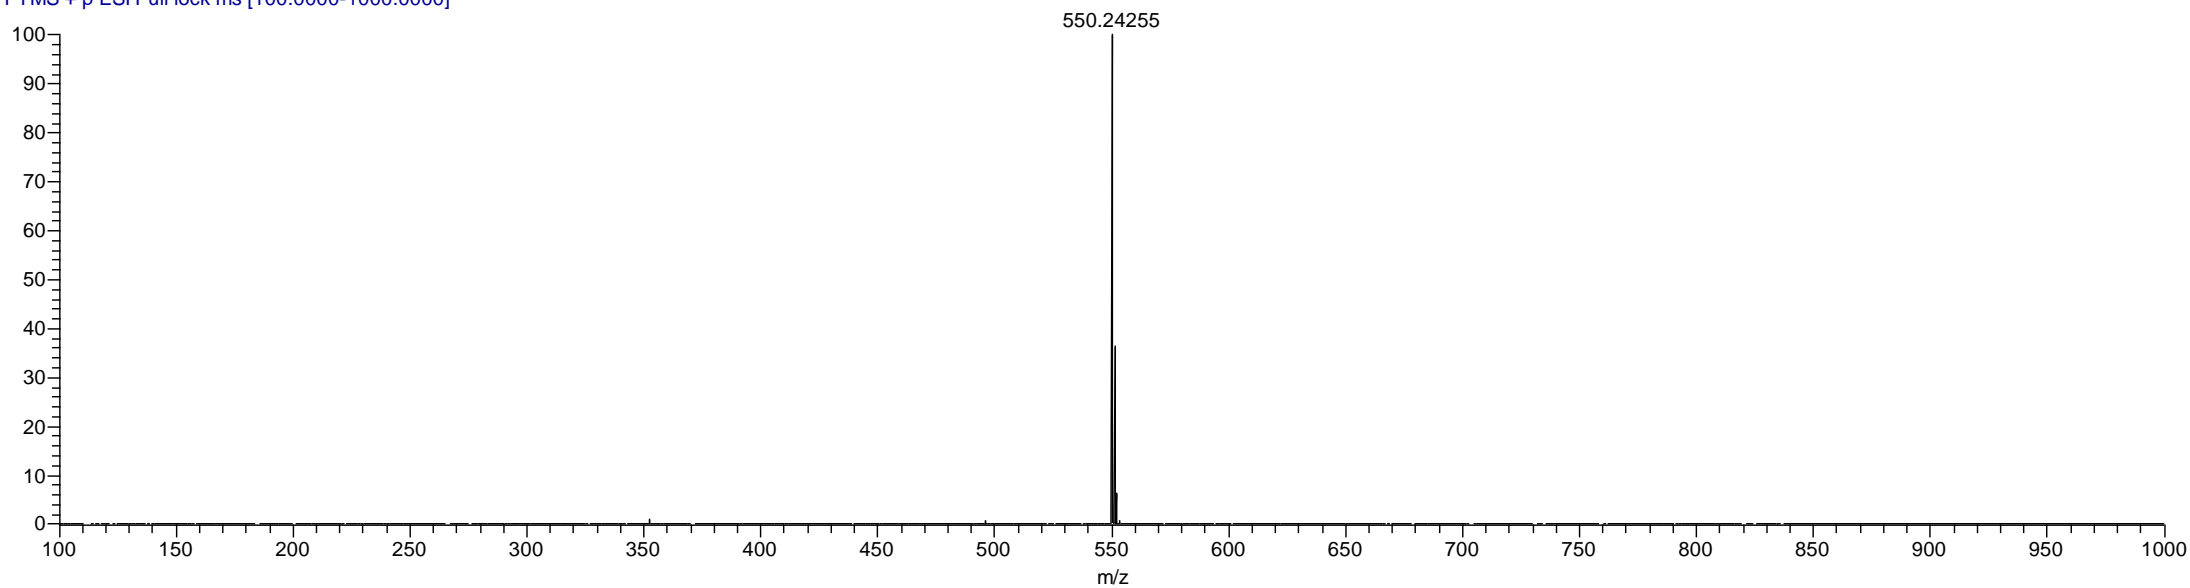



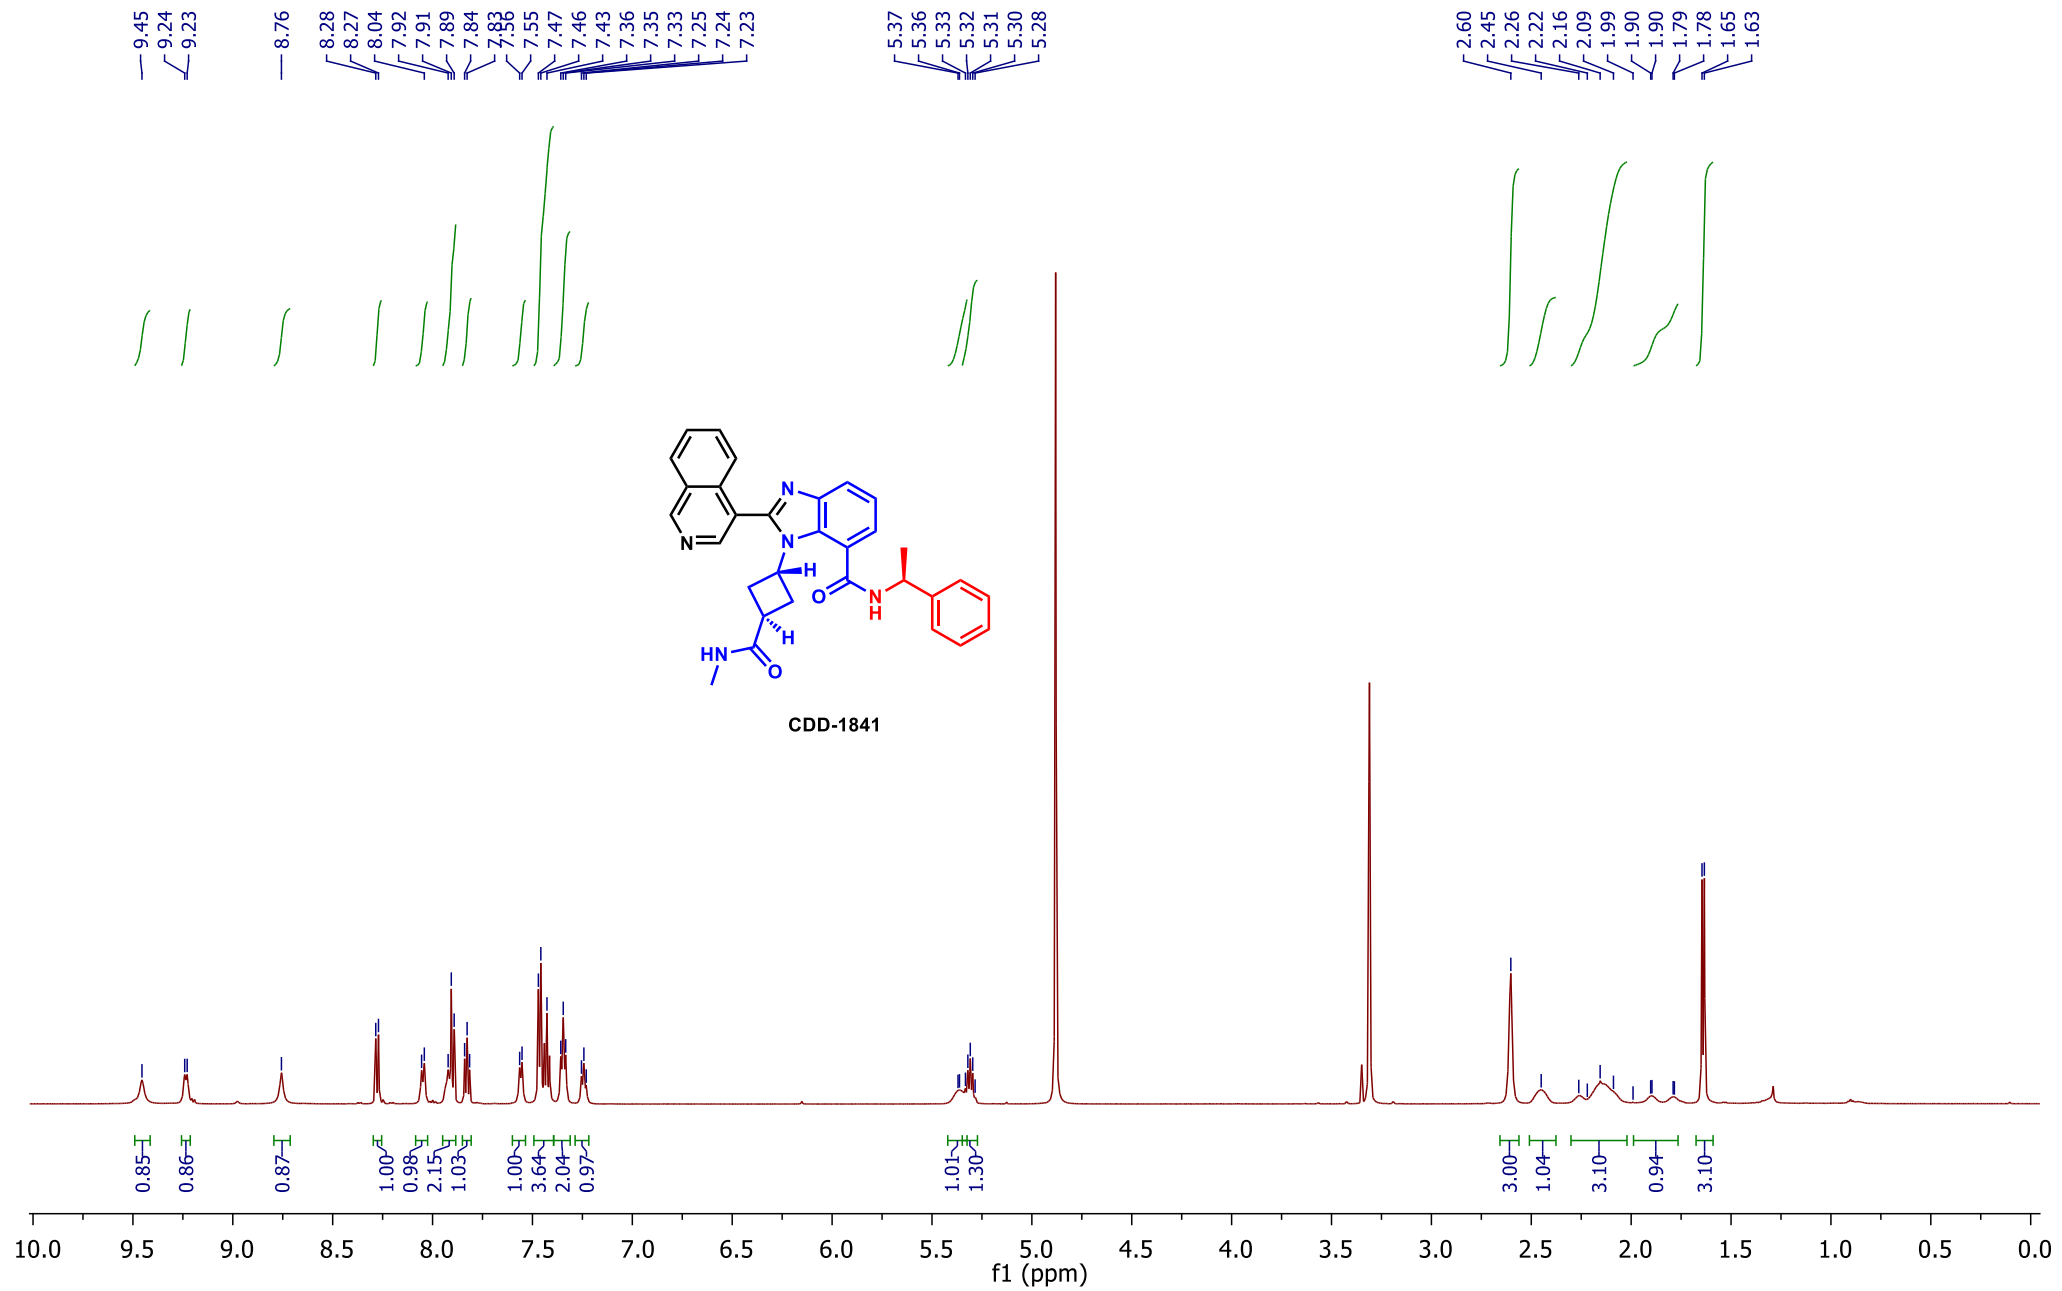

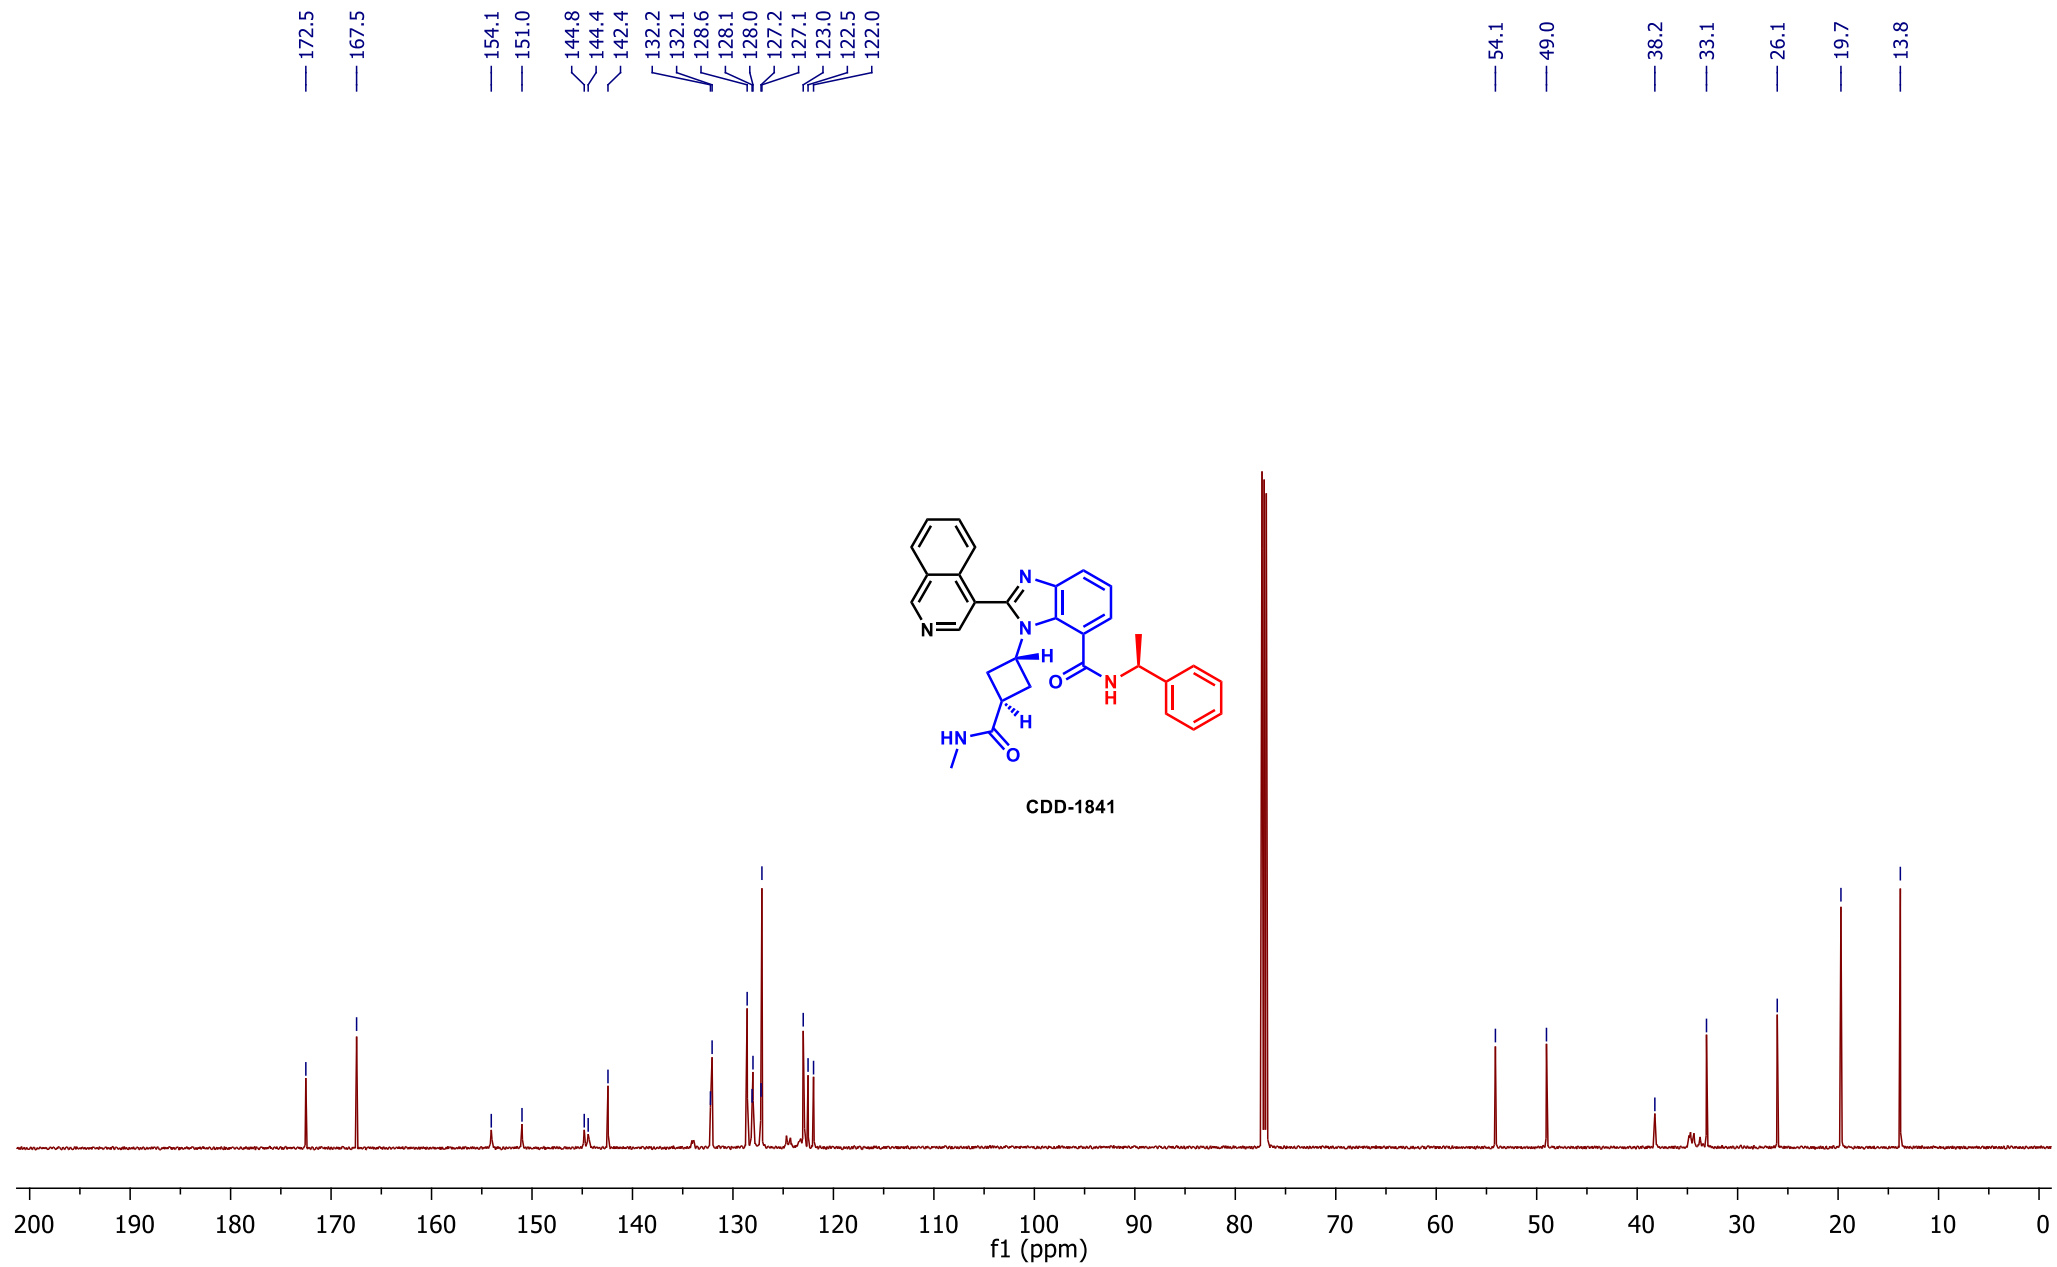

RT: 0.00 - 7.00

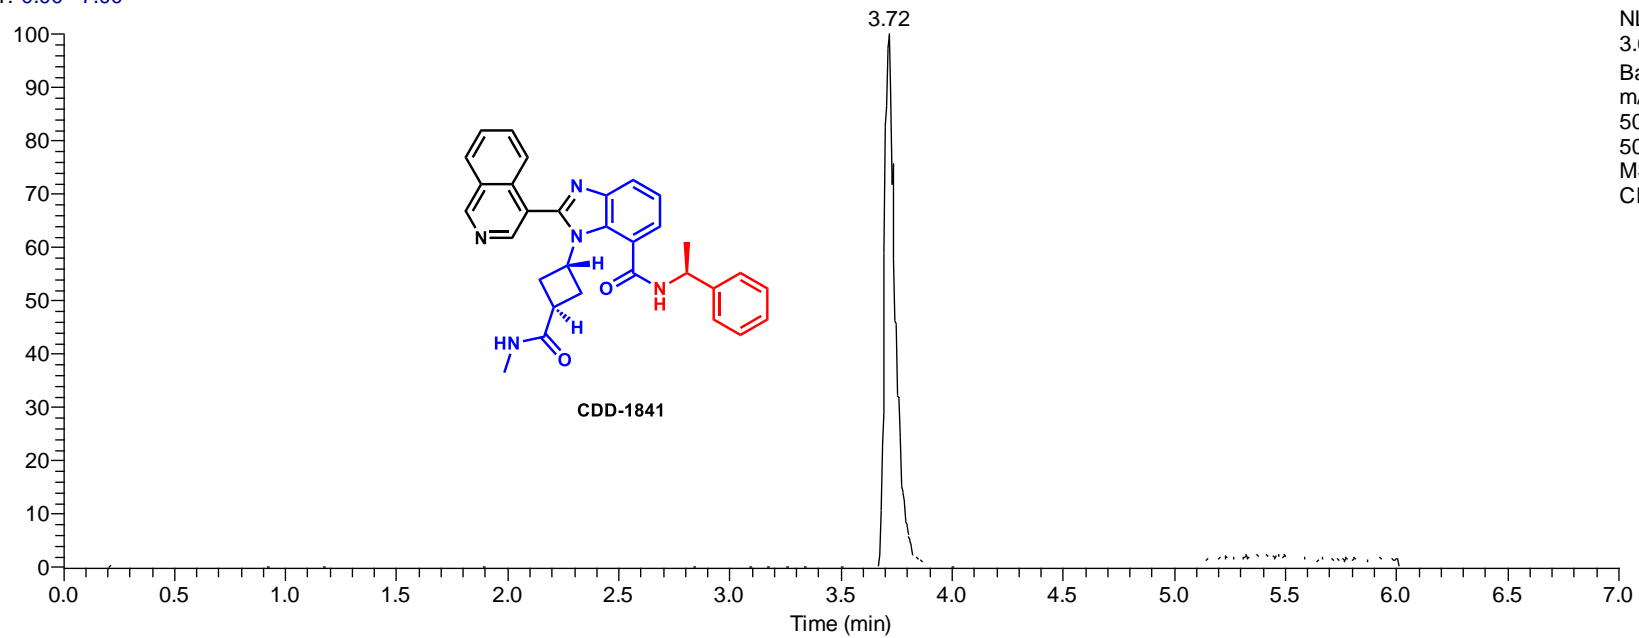

NL:  
3.63E8  
Base Peak  
m/z=  
503.7394-  
504.7394  
MS  
CDD1841

CDD1841 #646 RT: 3.72 AV: 1 NL: 3.02E8  
T: FTMS + p ESI Full ms [100.0000-1000.0000]

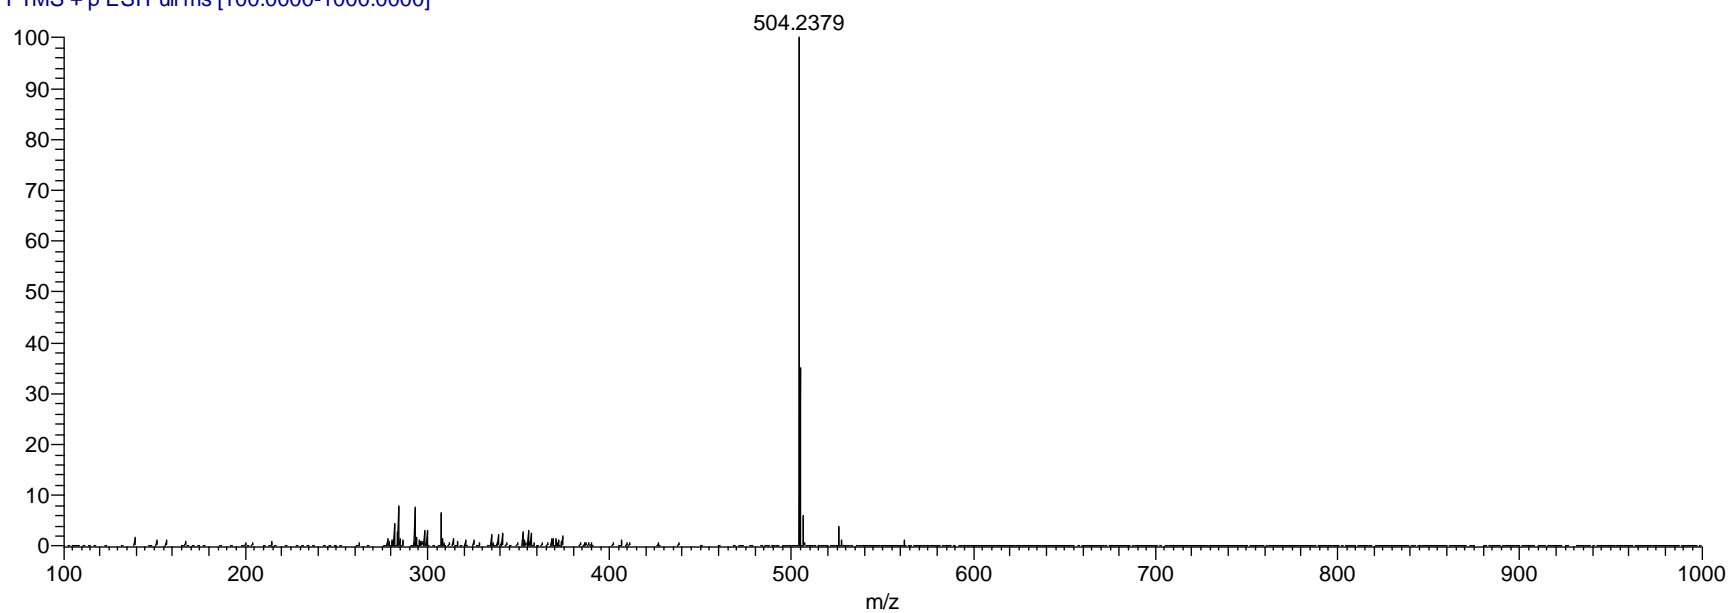

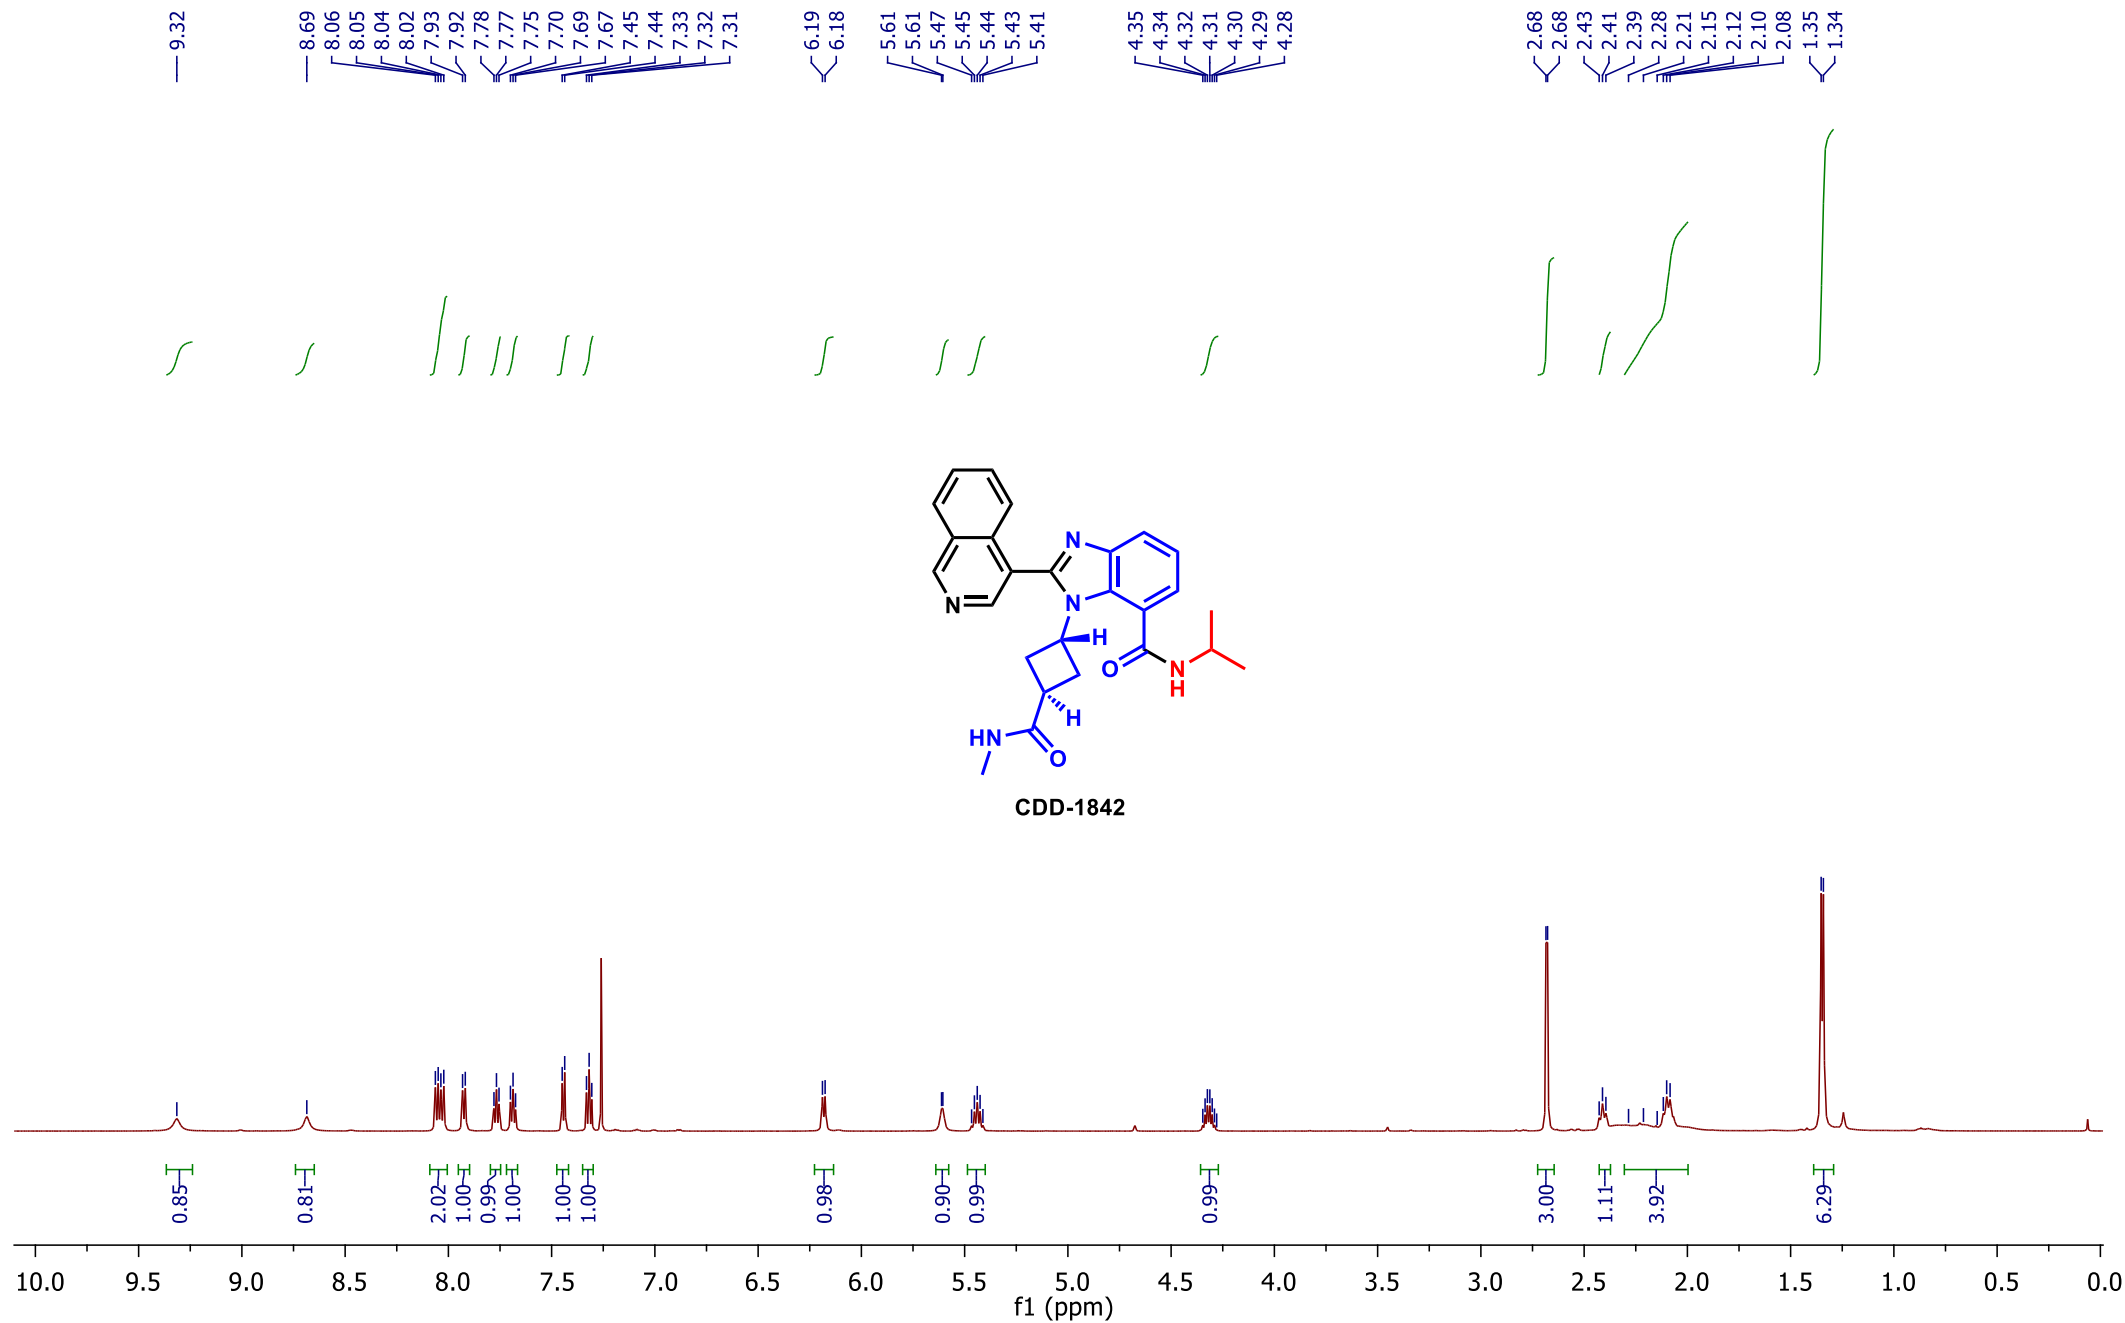

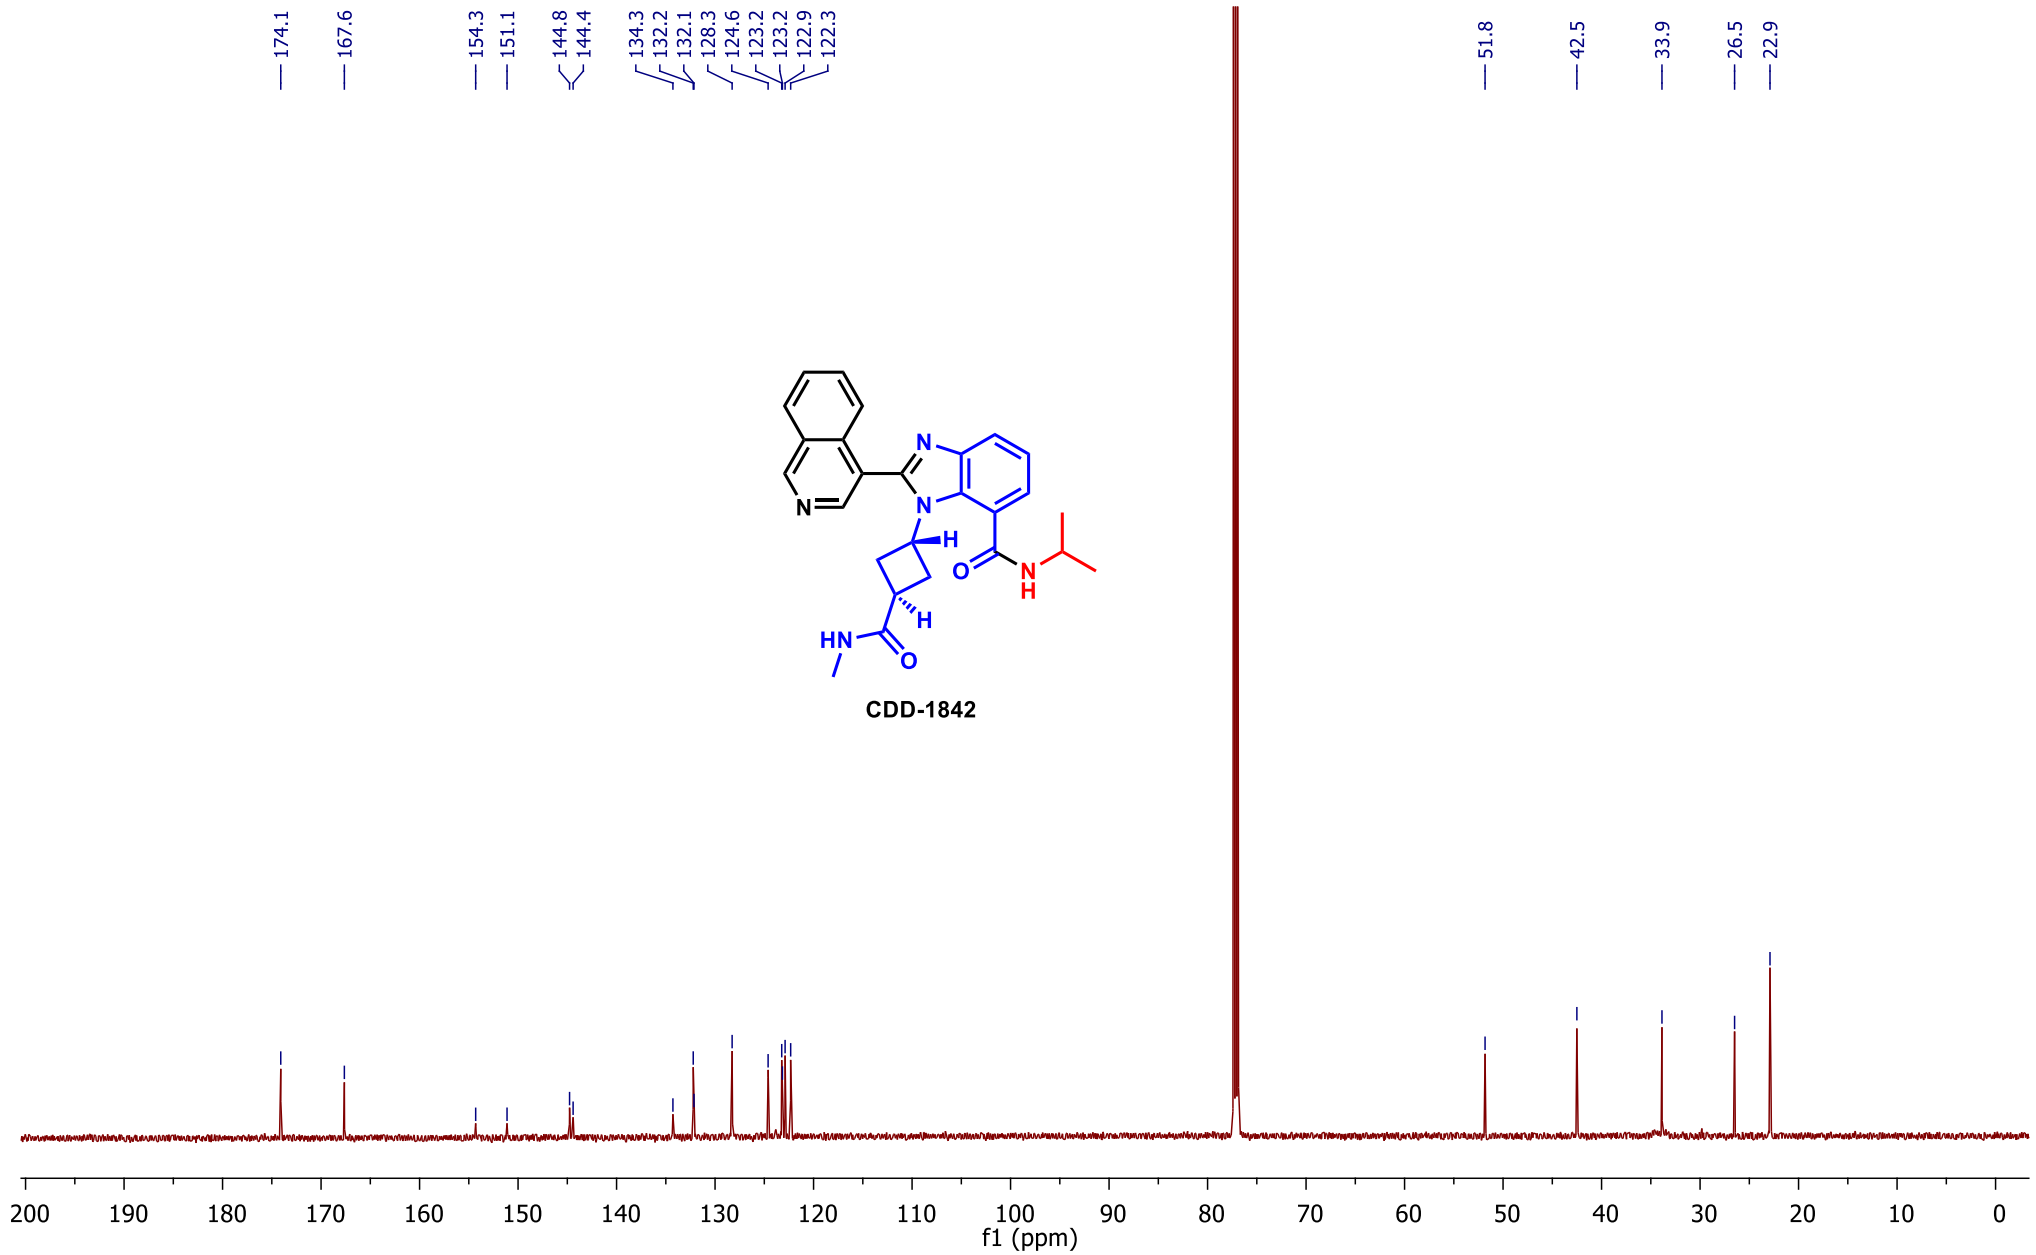

RT: 0.00 - 7.00

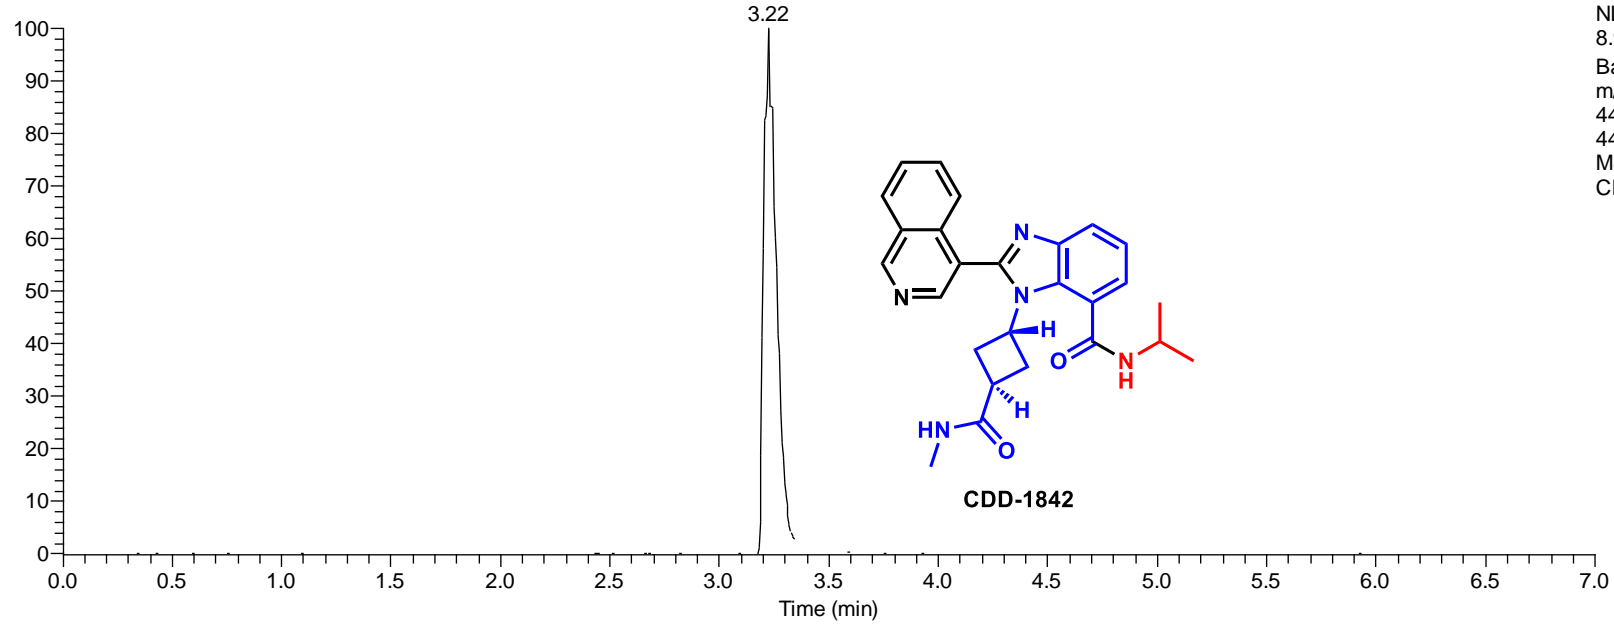

NL:  
8.95E8  
Base Peak  
m/z=  
441.7238-  
442.7238  
MS  
CDD1842

CDD1842 #538 RT: 3.22 AV: 1 NL: 8.88E8  
T: FTMS + p ESI Full ms [100.0000-1000.0000]

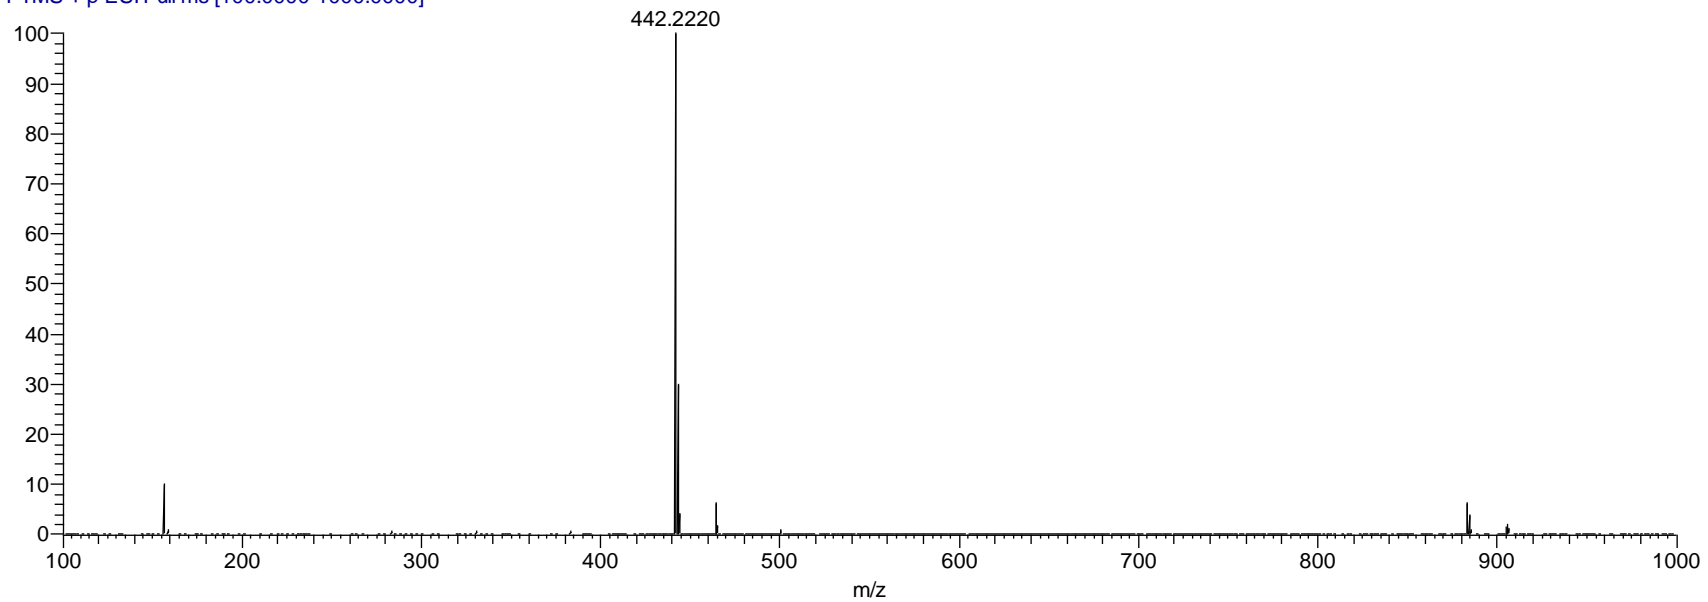

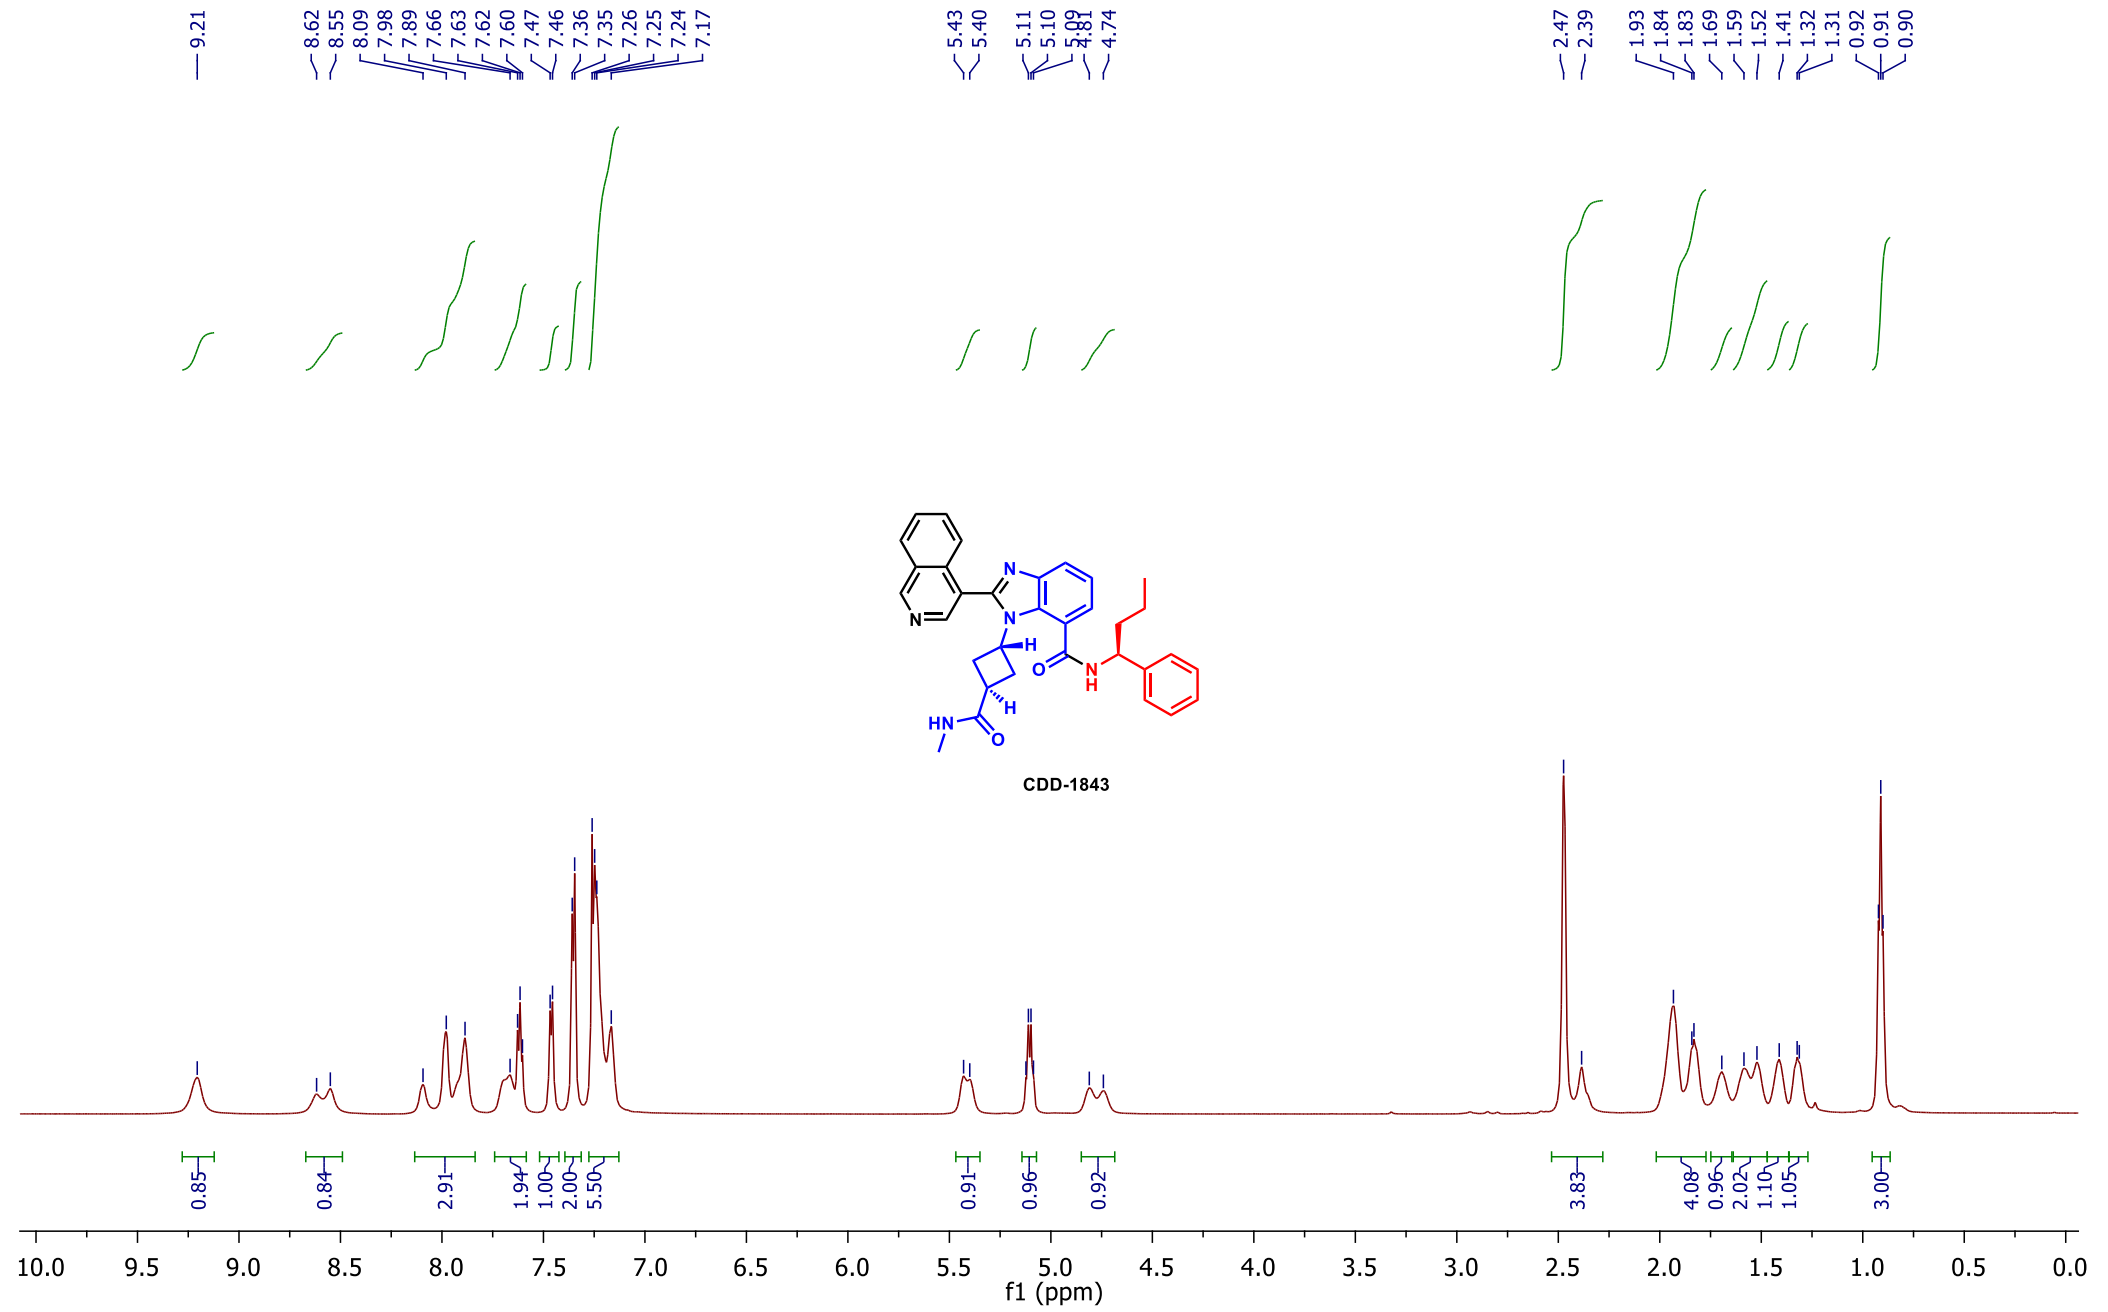

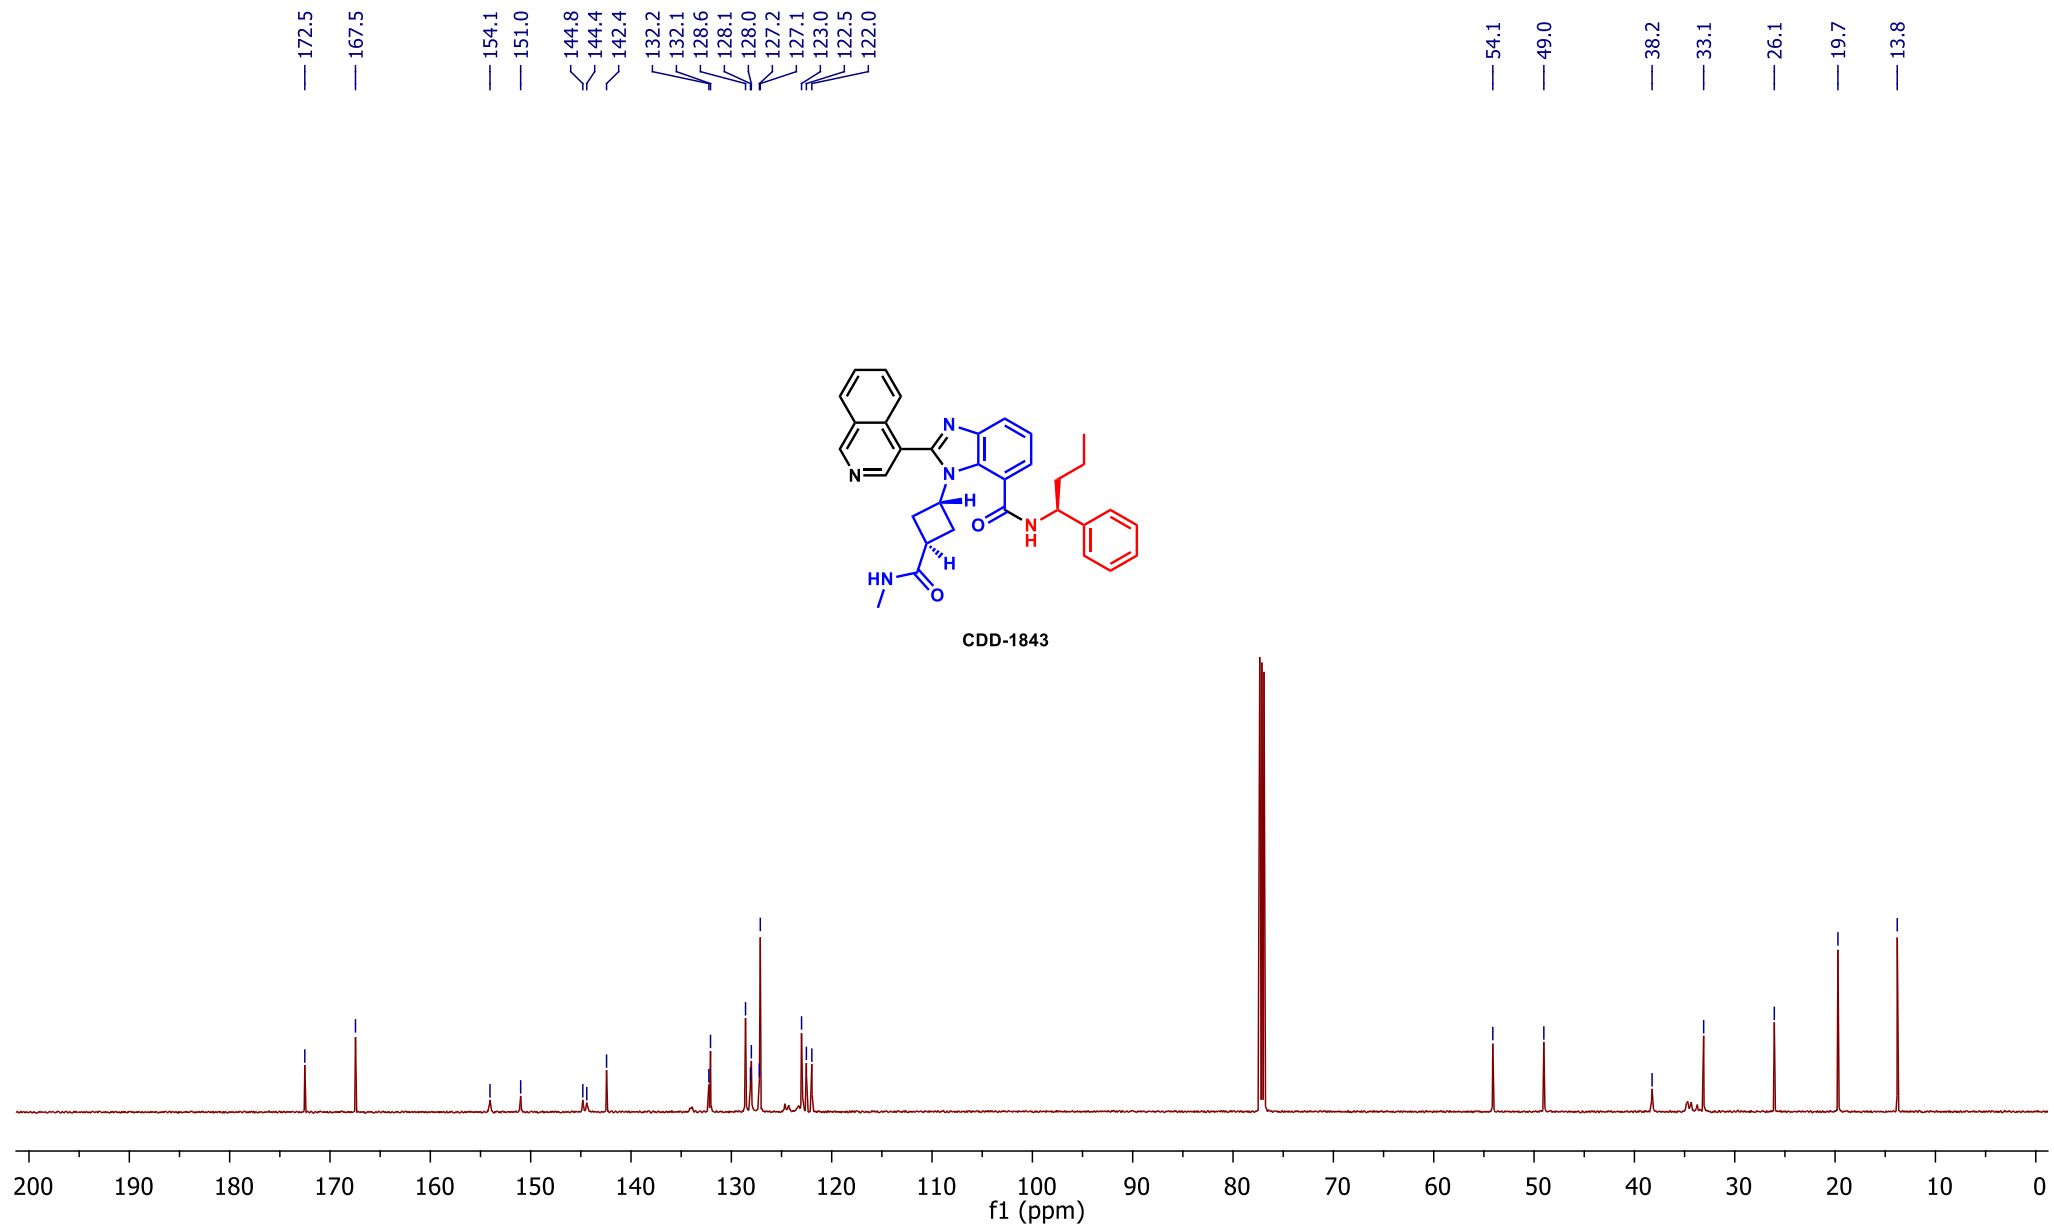



RT: 0.00 - 7.00 SM: 7B

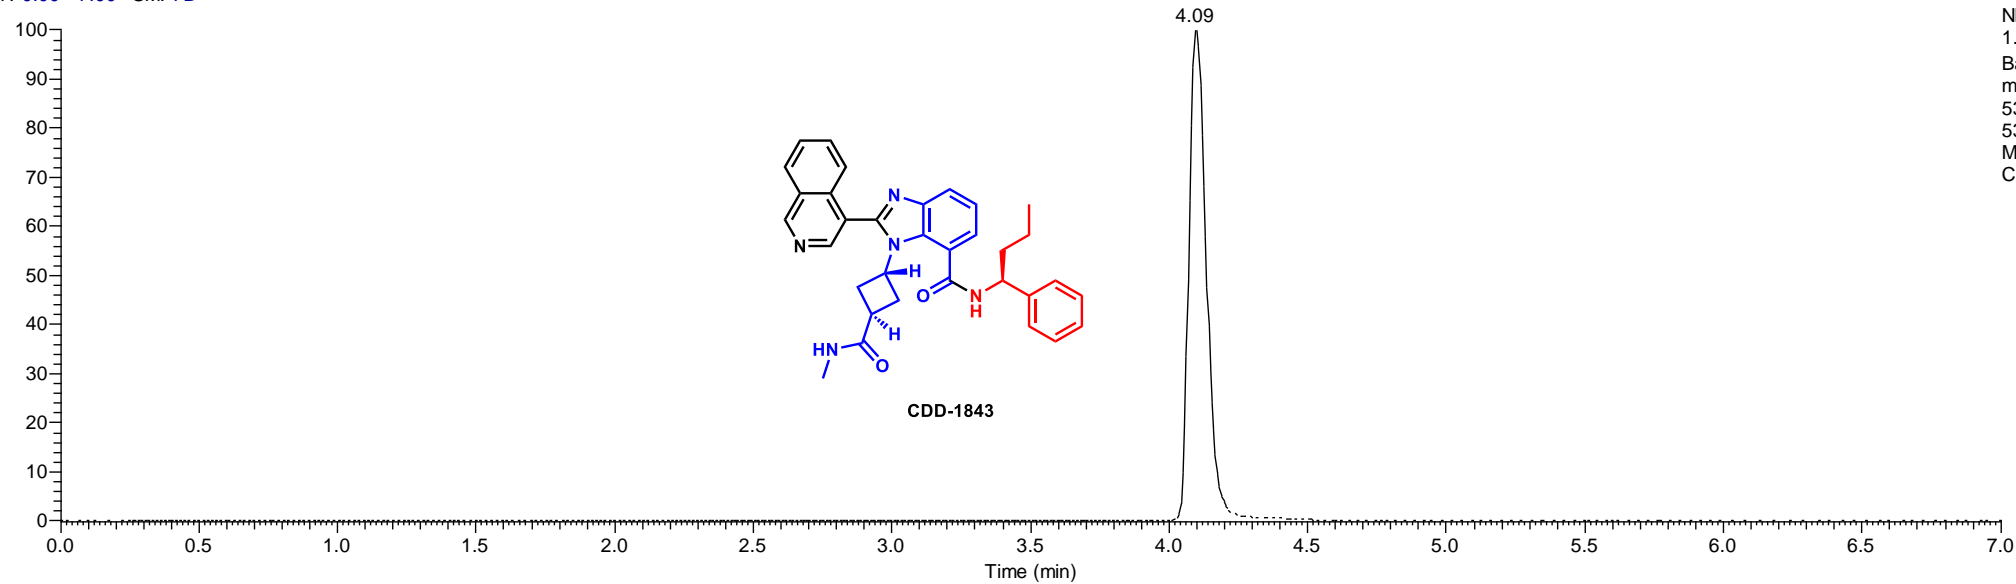

NL:  
1.80E9  
Base Peak  
m/z=  
531.7707-  
532.7707  
MS  
CDD1843

CDD1843 #557 RT: 4.09 AV: 1 NL: 1.99E9  
T: FTMS + p ESI Full ms [100.0000-1000.0000]

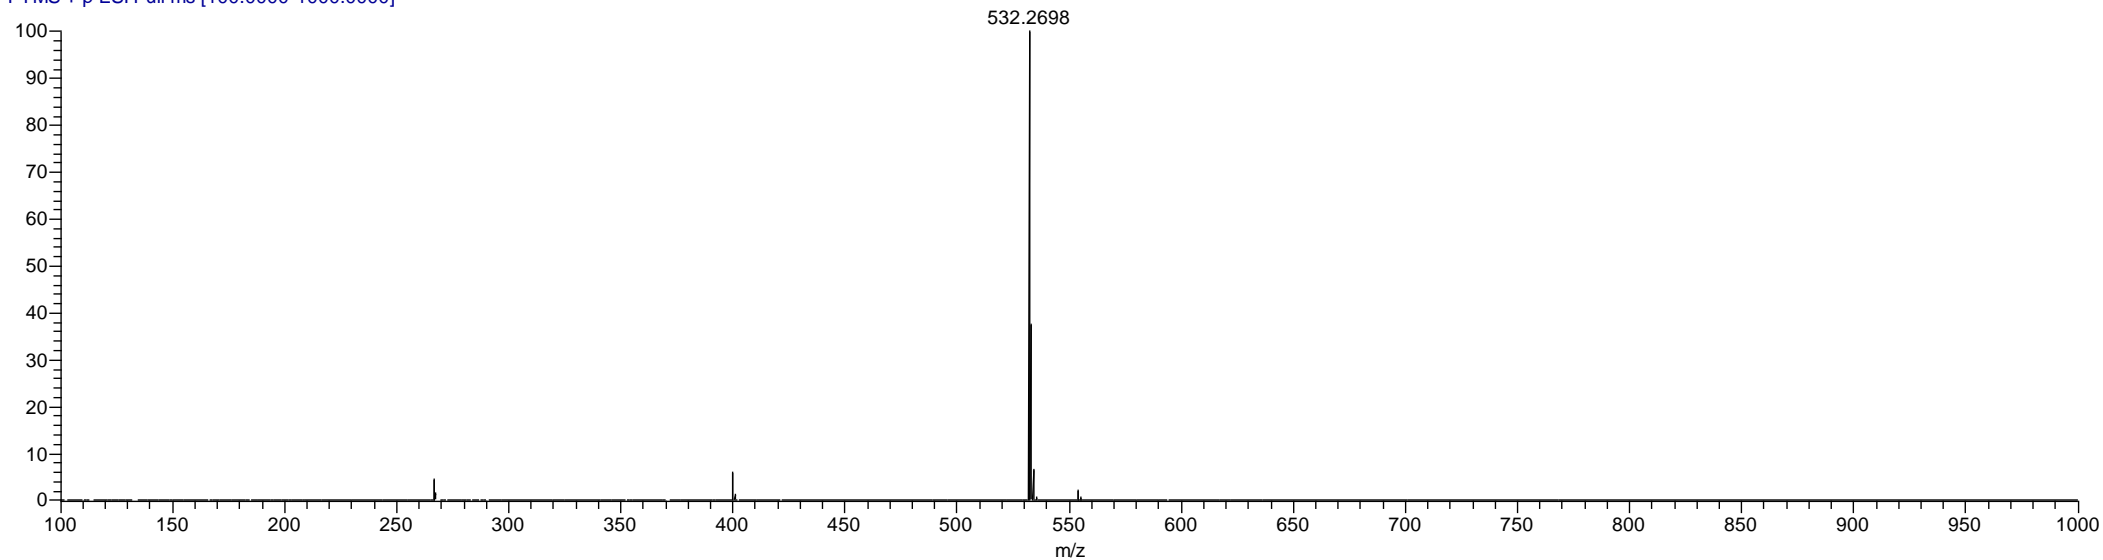

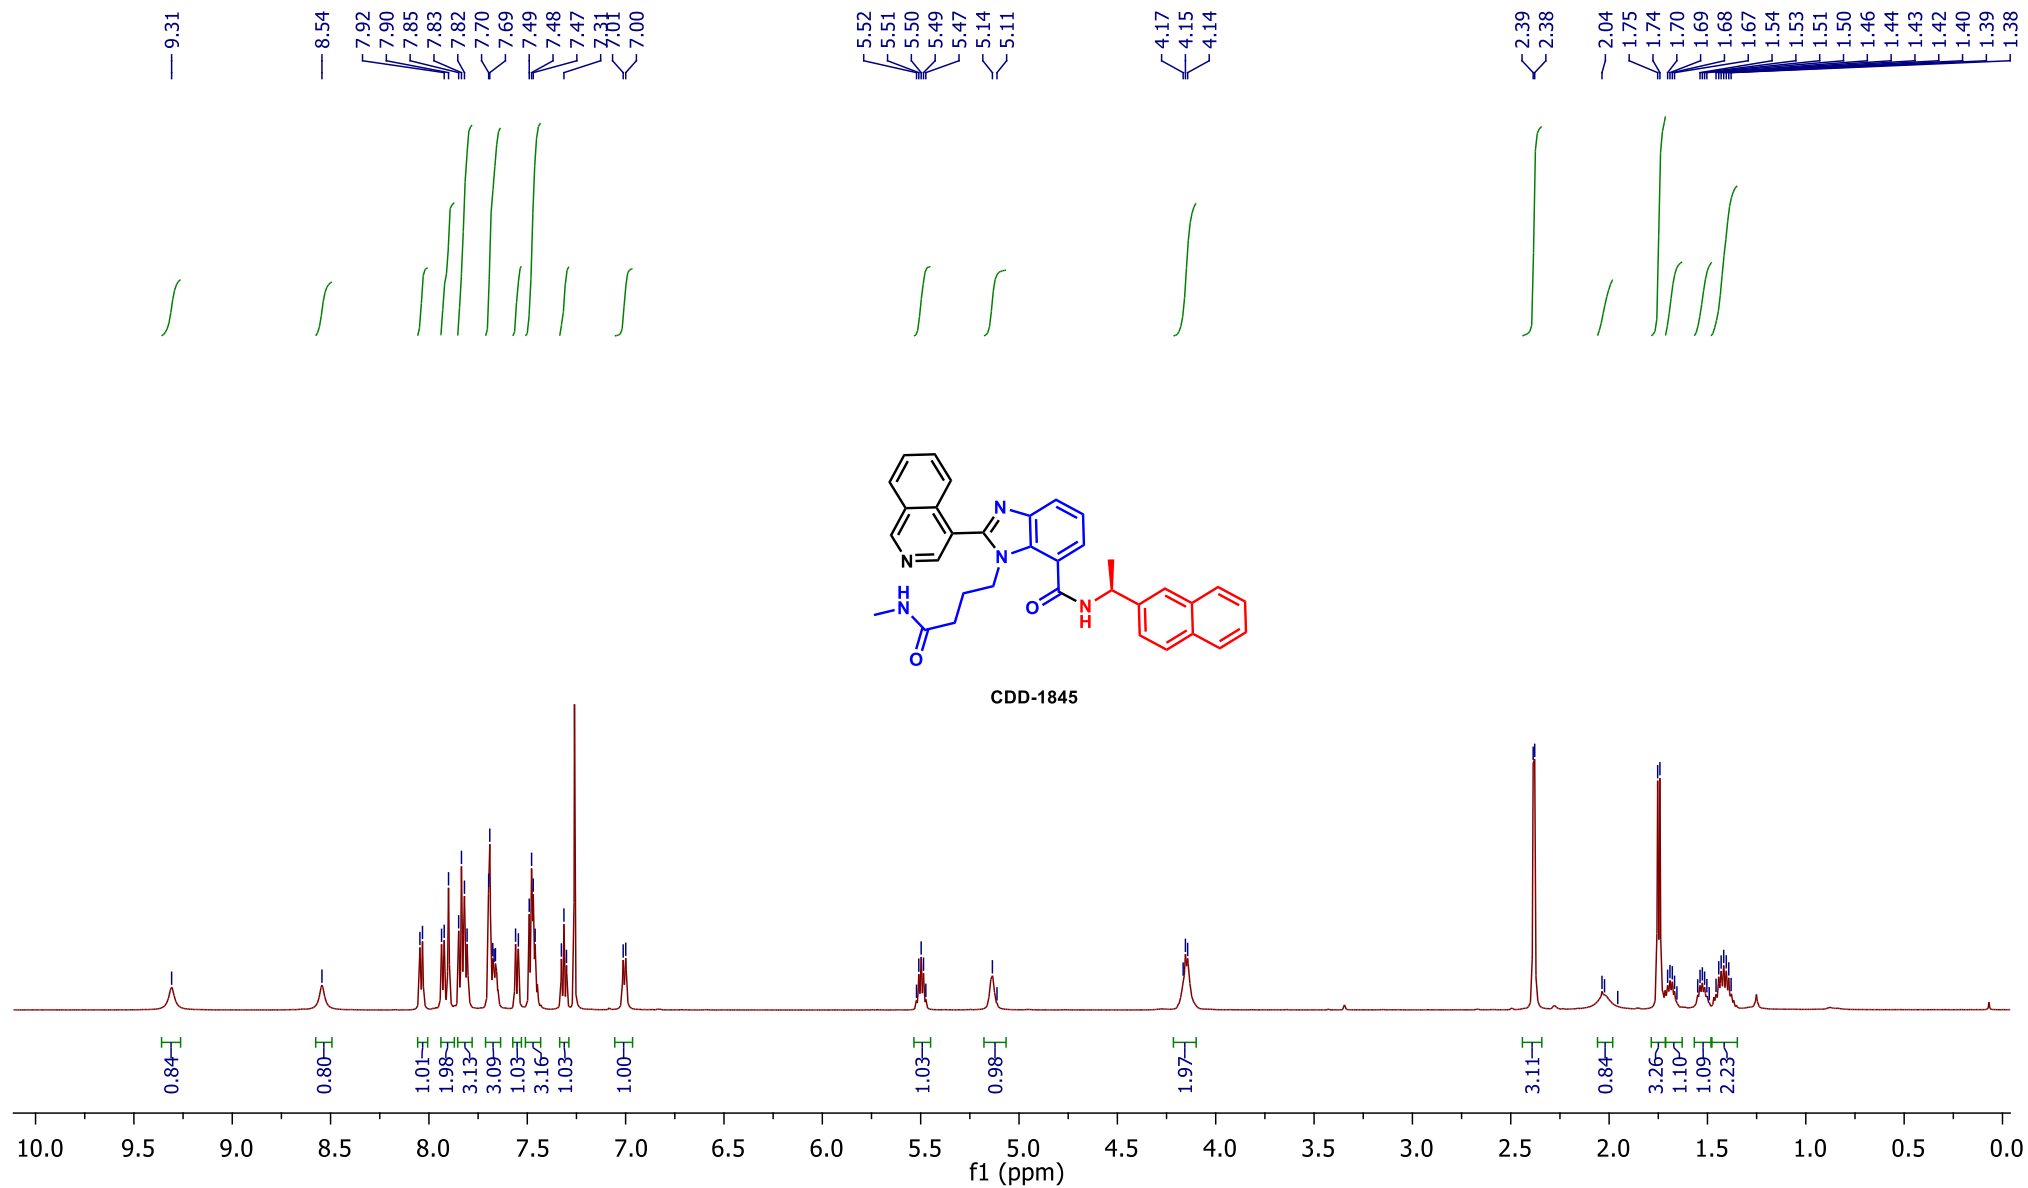

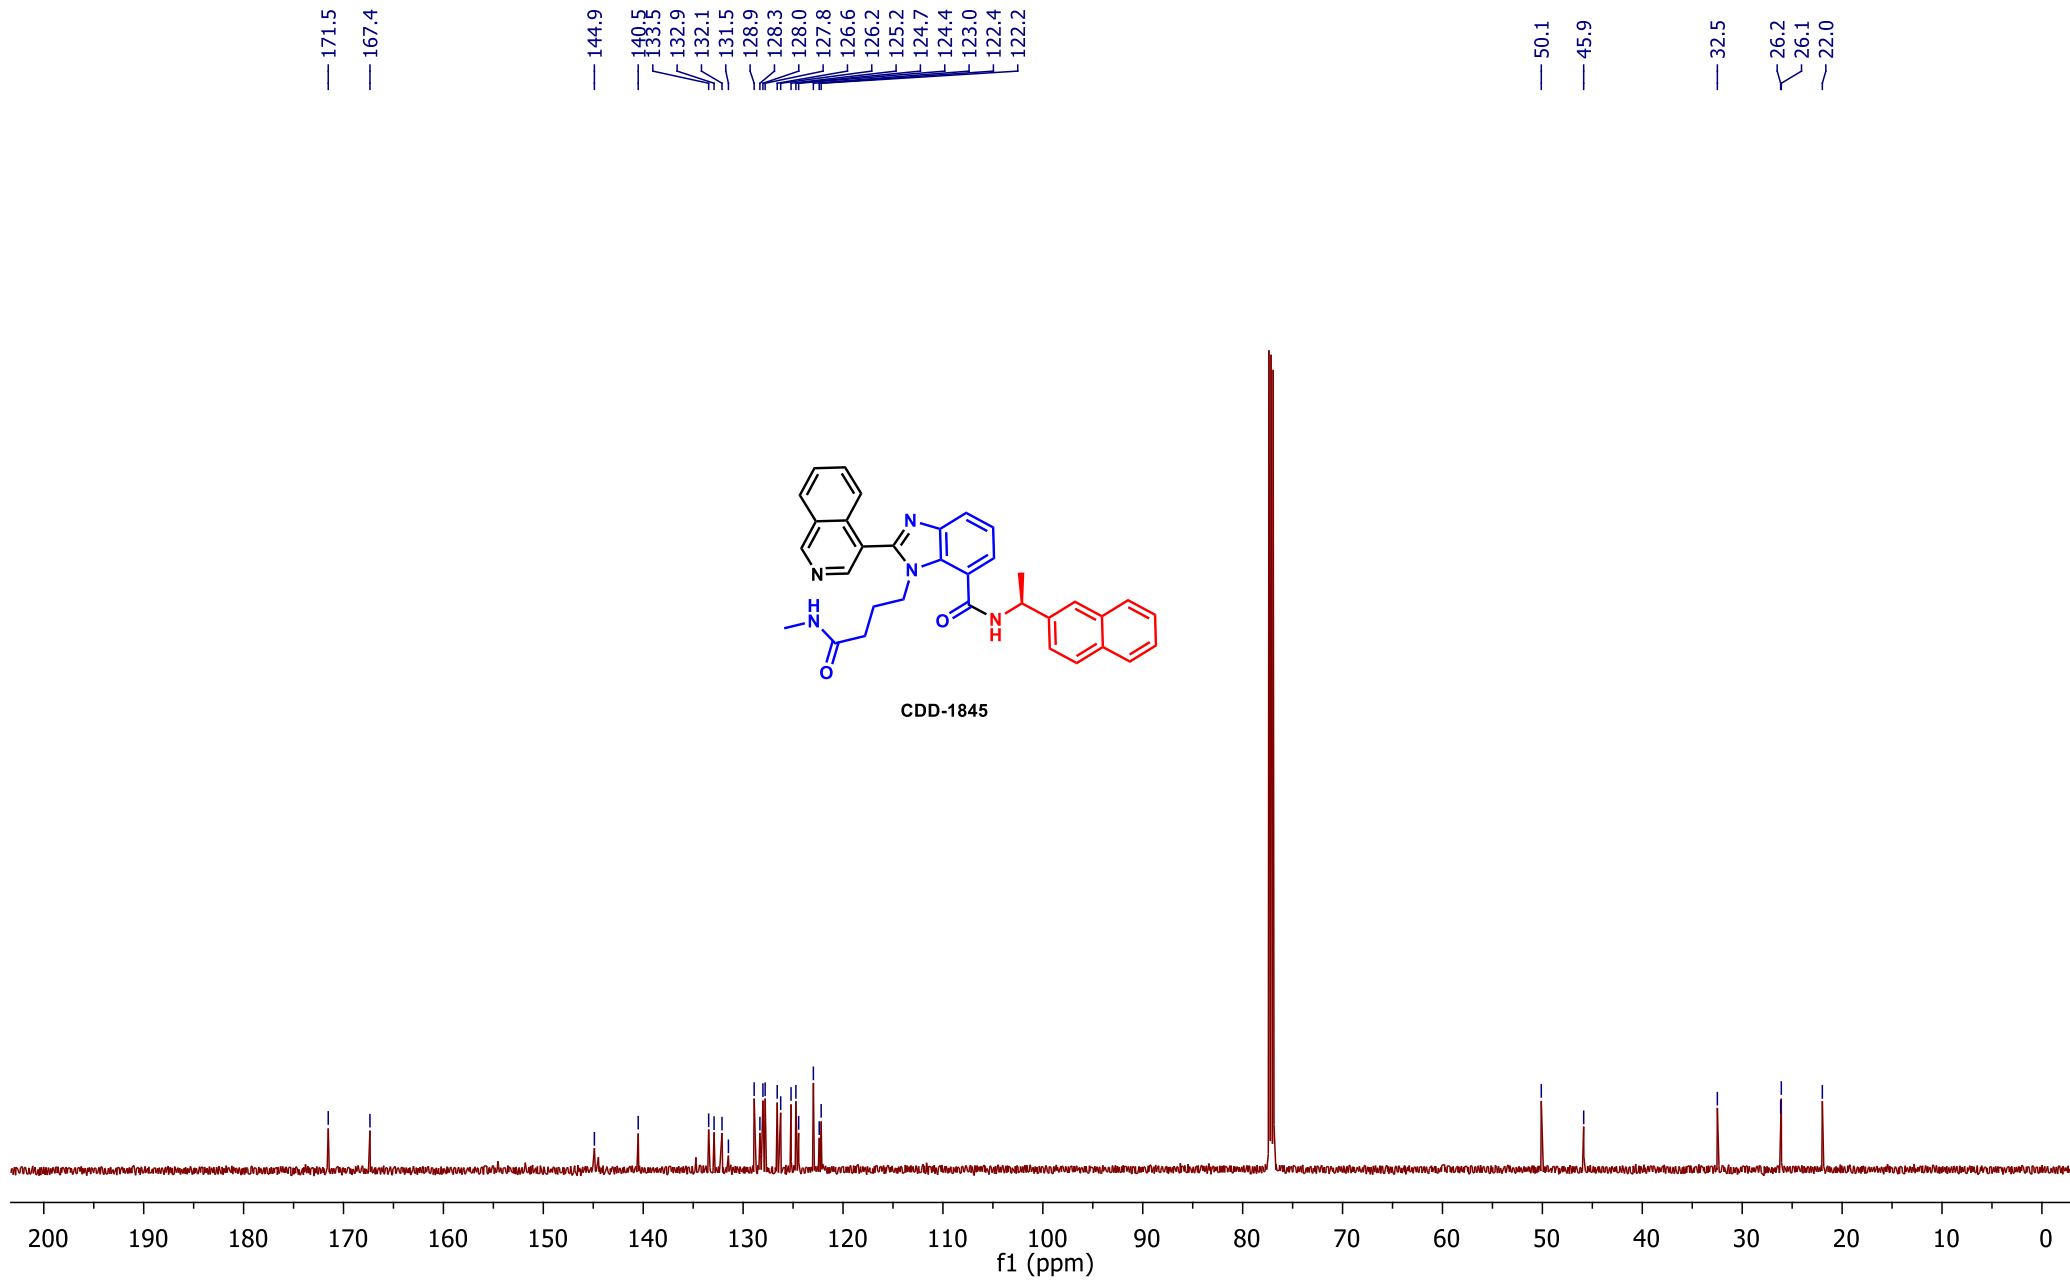

RT: 0.00 - 7.01

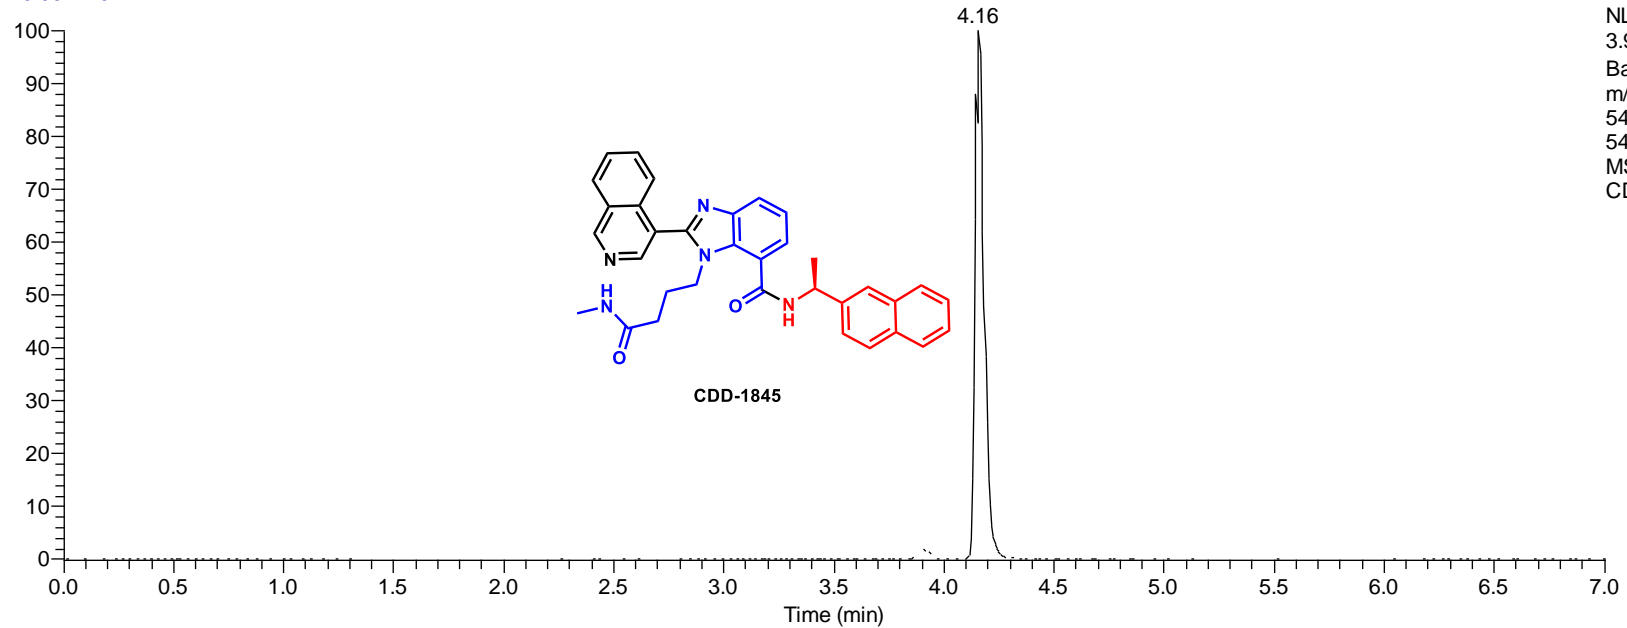

NL:  
3.90E8  
Base Peak  
m/z=  
541.7551-  
542.7551  
MS  
CDD1845

CDD1845 #603 RT: 4.16 AV: 1 NL: 3.82E8  
T: FTMS + p ESI Full ms [100.0000-1000.0000]

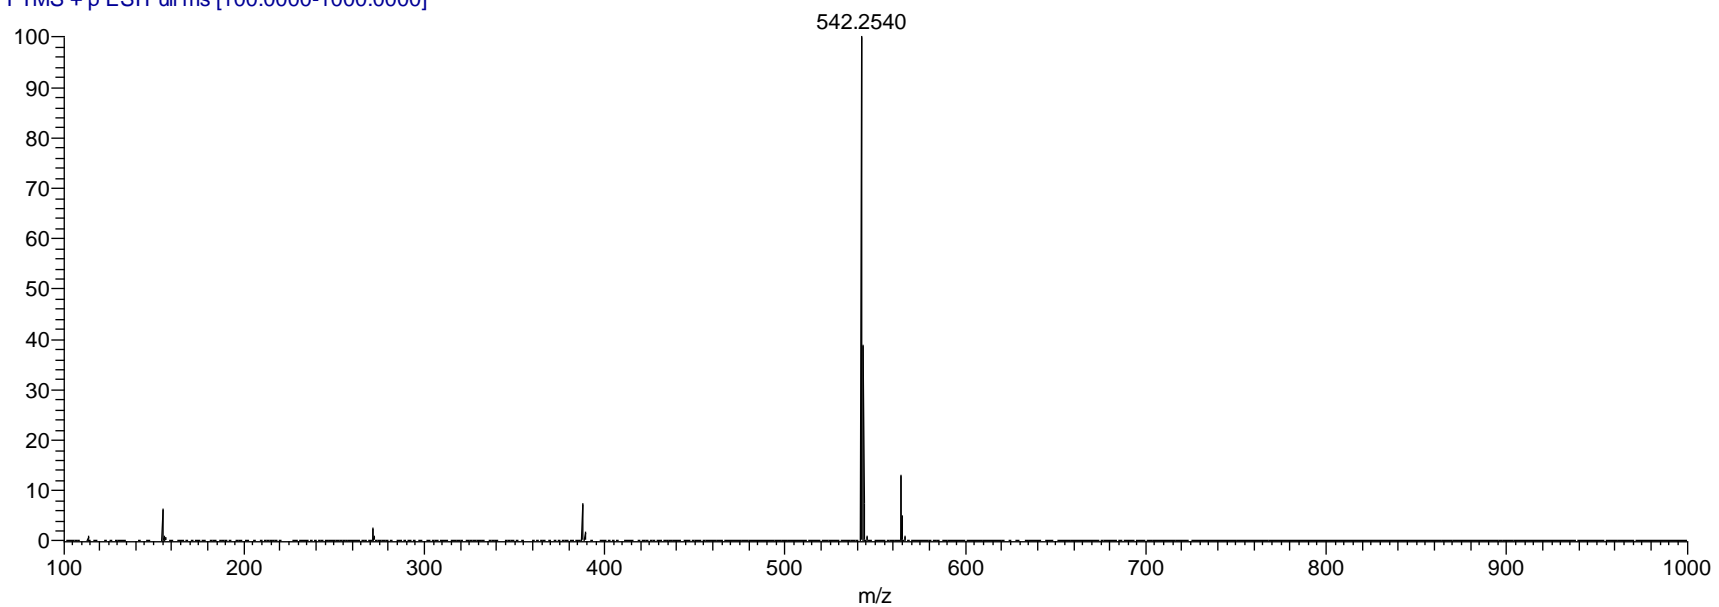

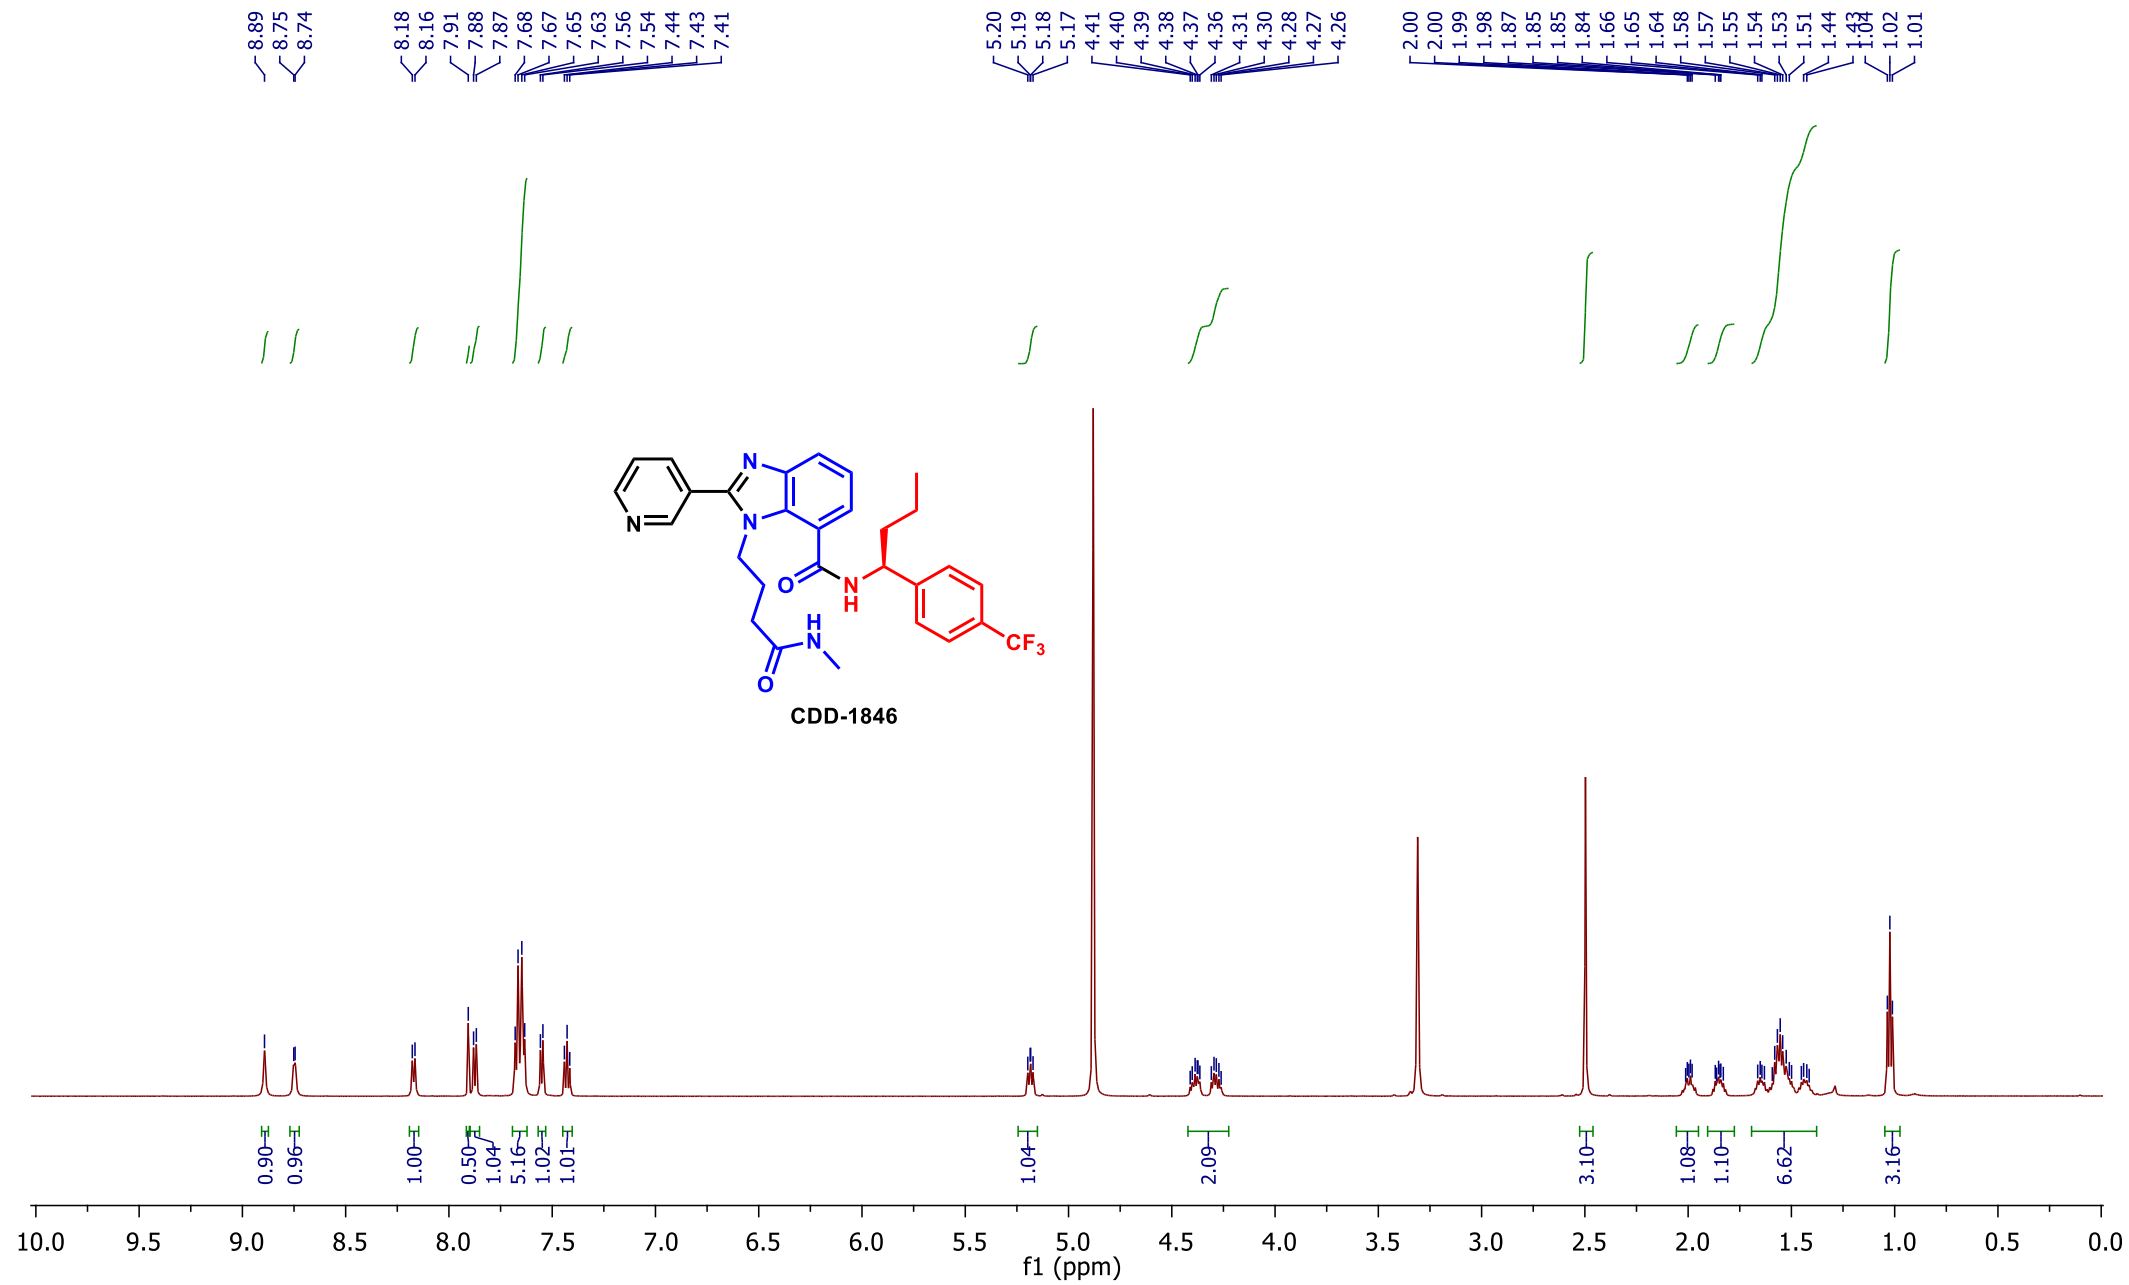

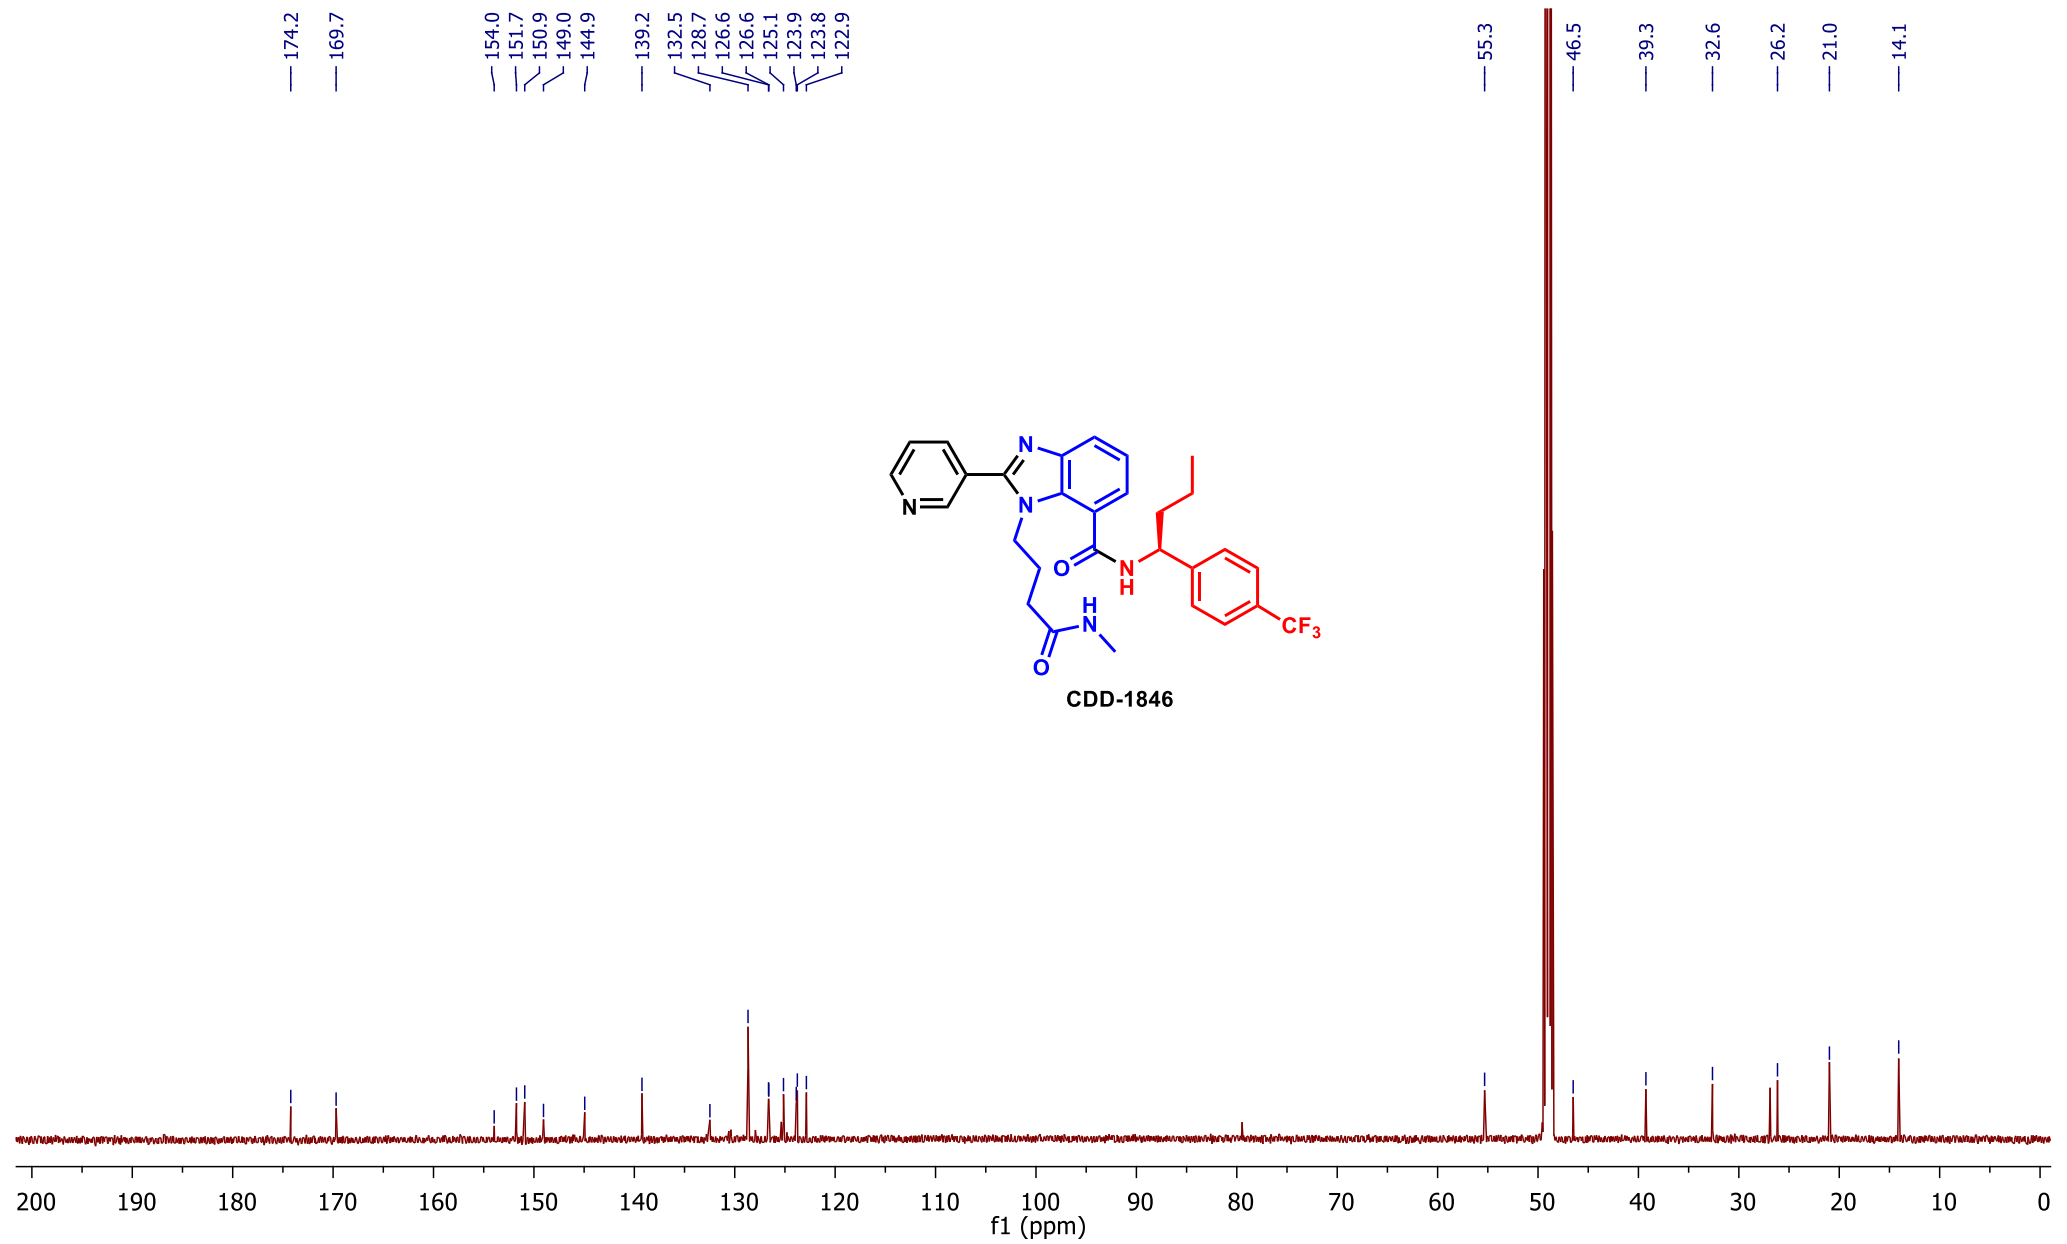

RT: 0.00 - 7.01

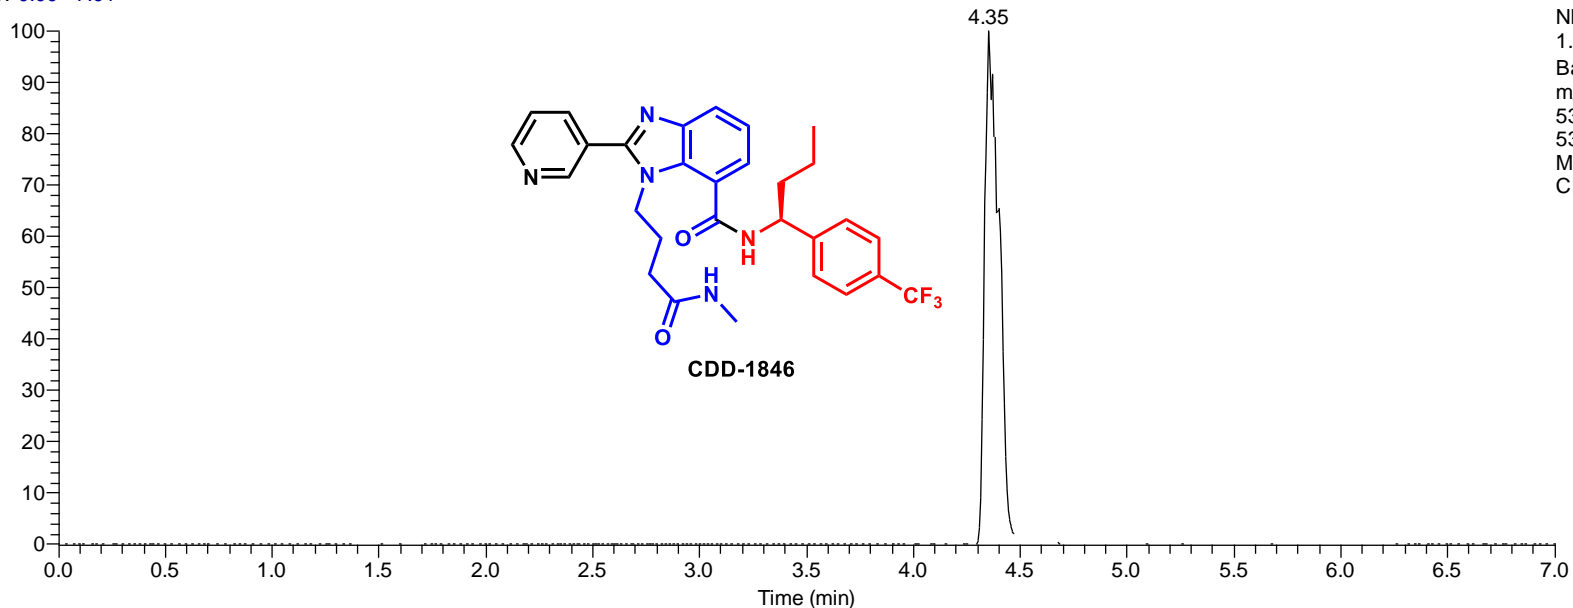

NL:  
1.67E8  
Base Peak  
m/z=  
537.7424-  
538.7424  
MS  
CDD1846

CDD1846 #560 RT: 4.35 AV: 1 NL: 1.62E8  
T: FTMS + p ESI Full lock ms [100.0000-1000.0000]

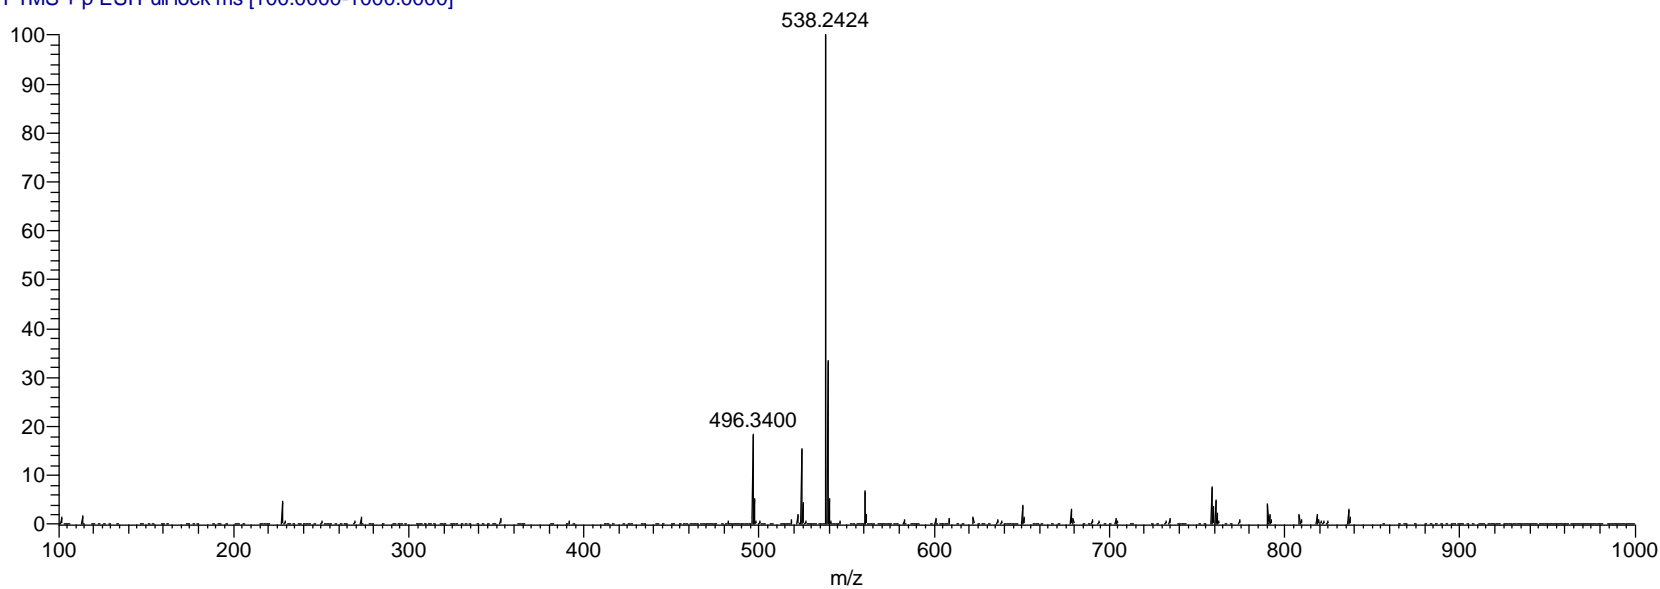

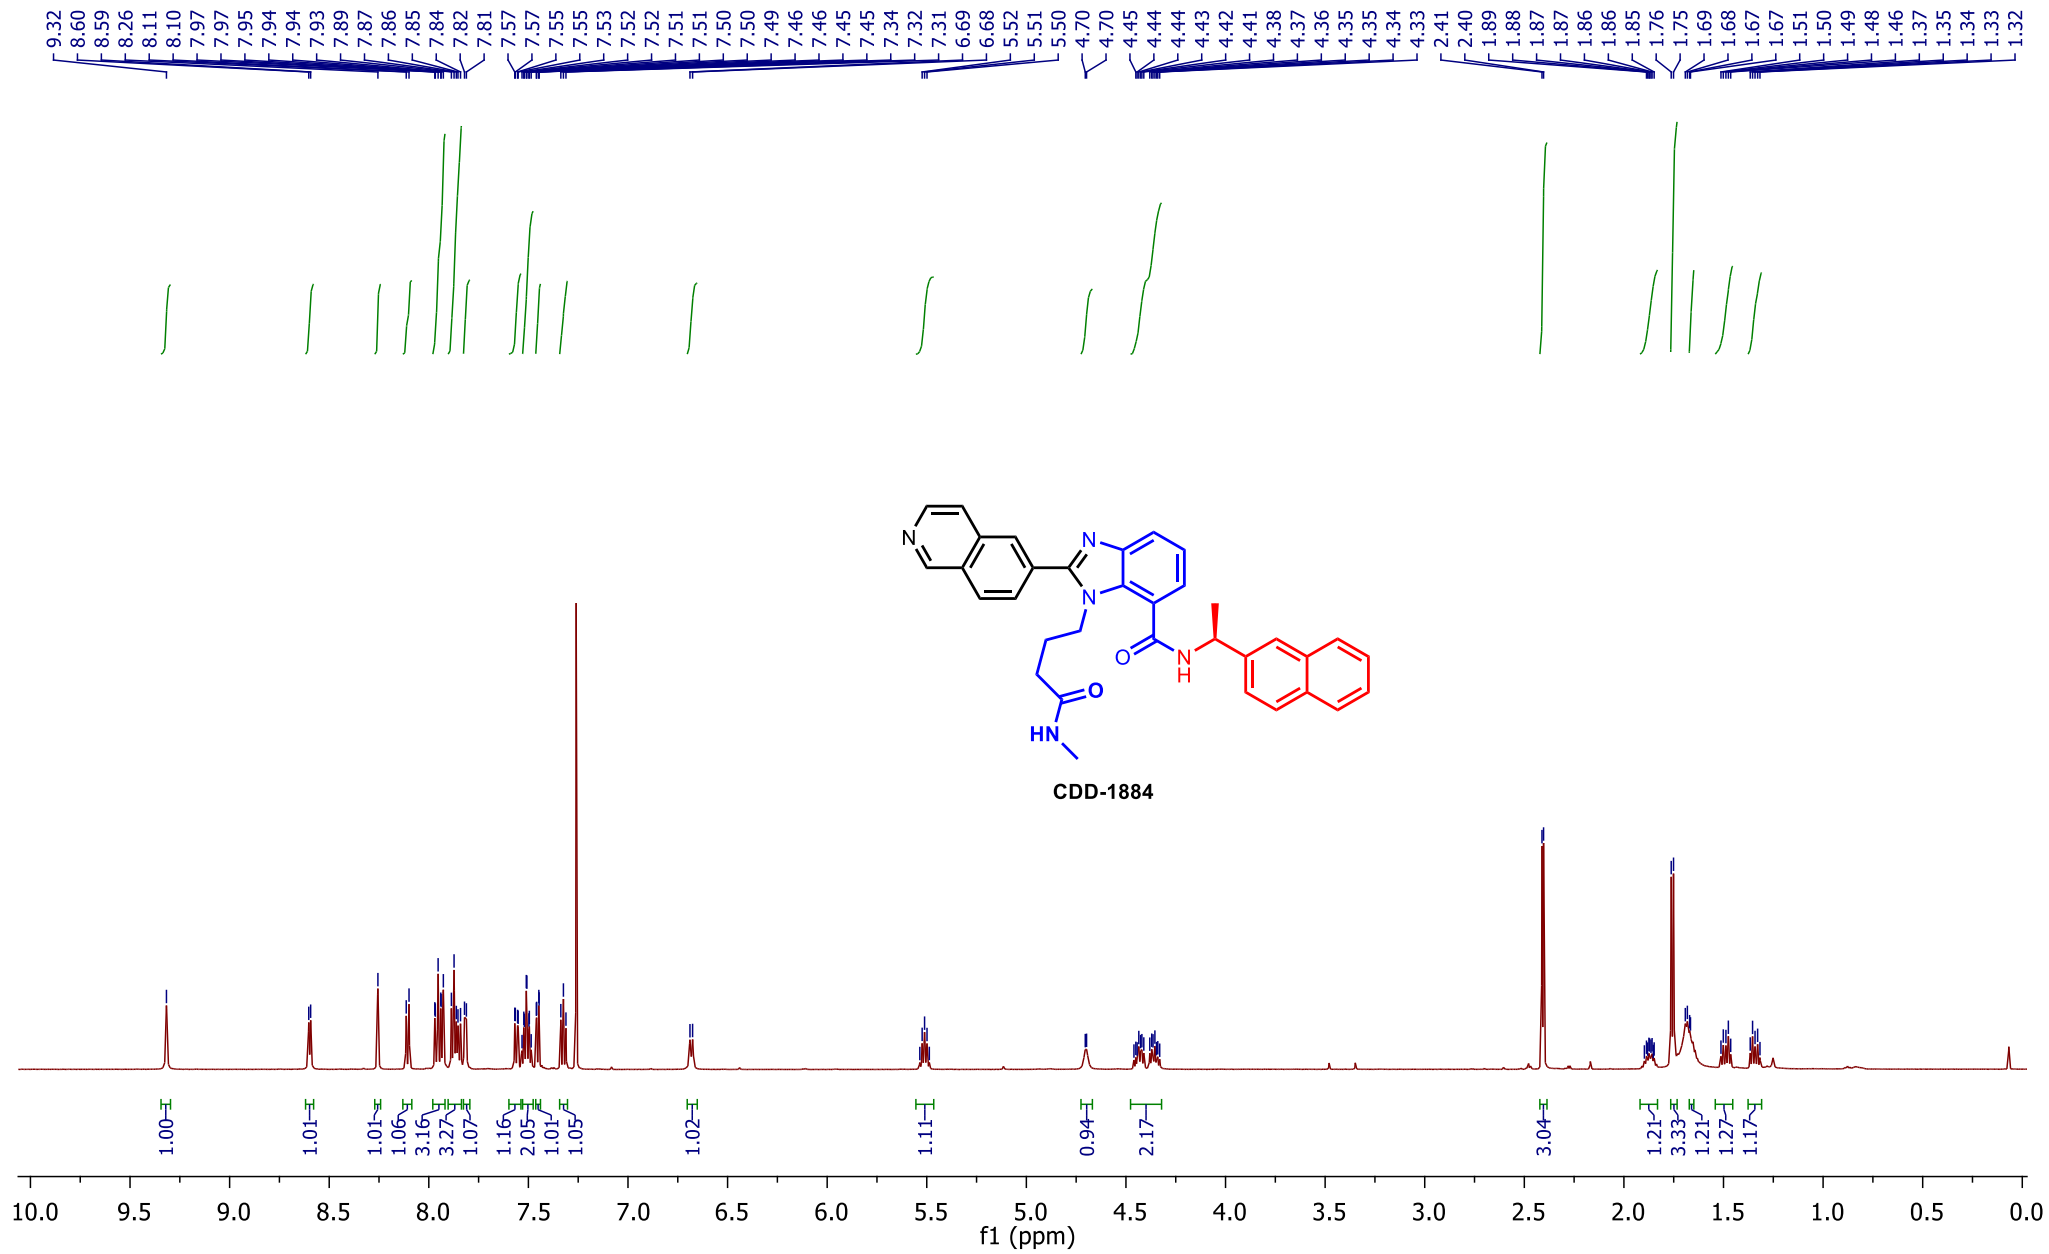



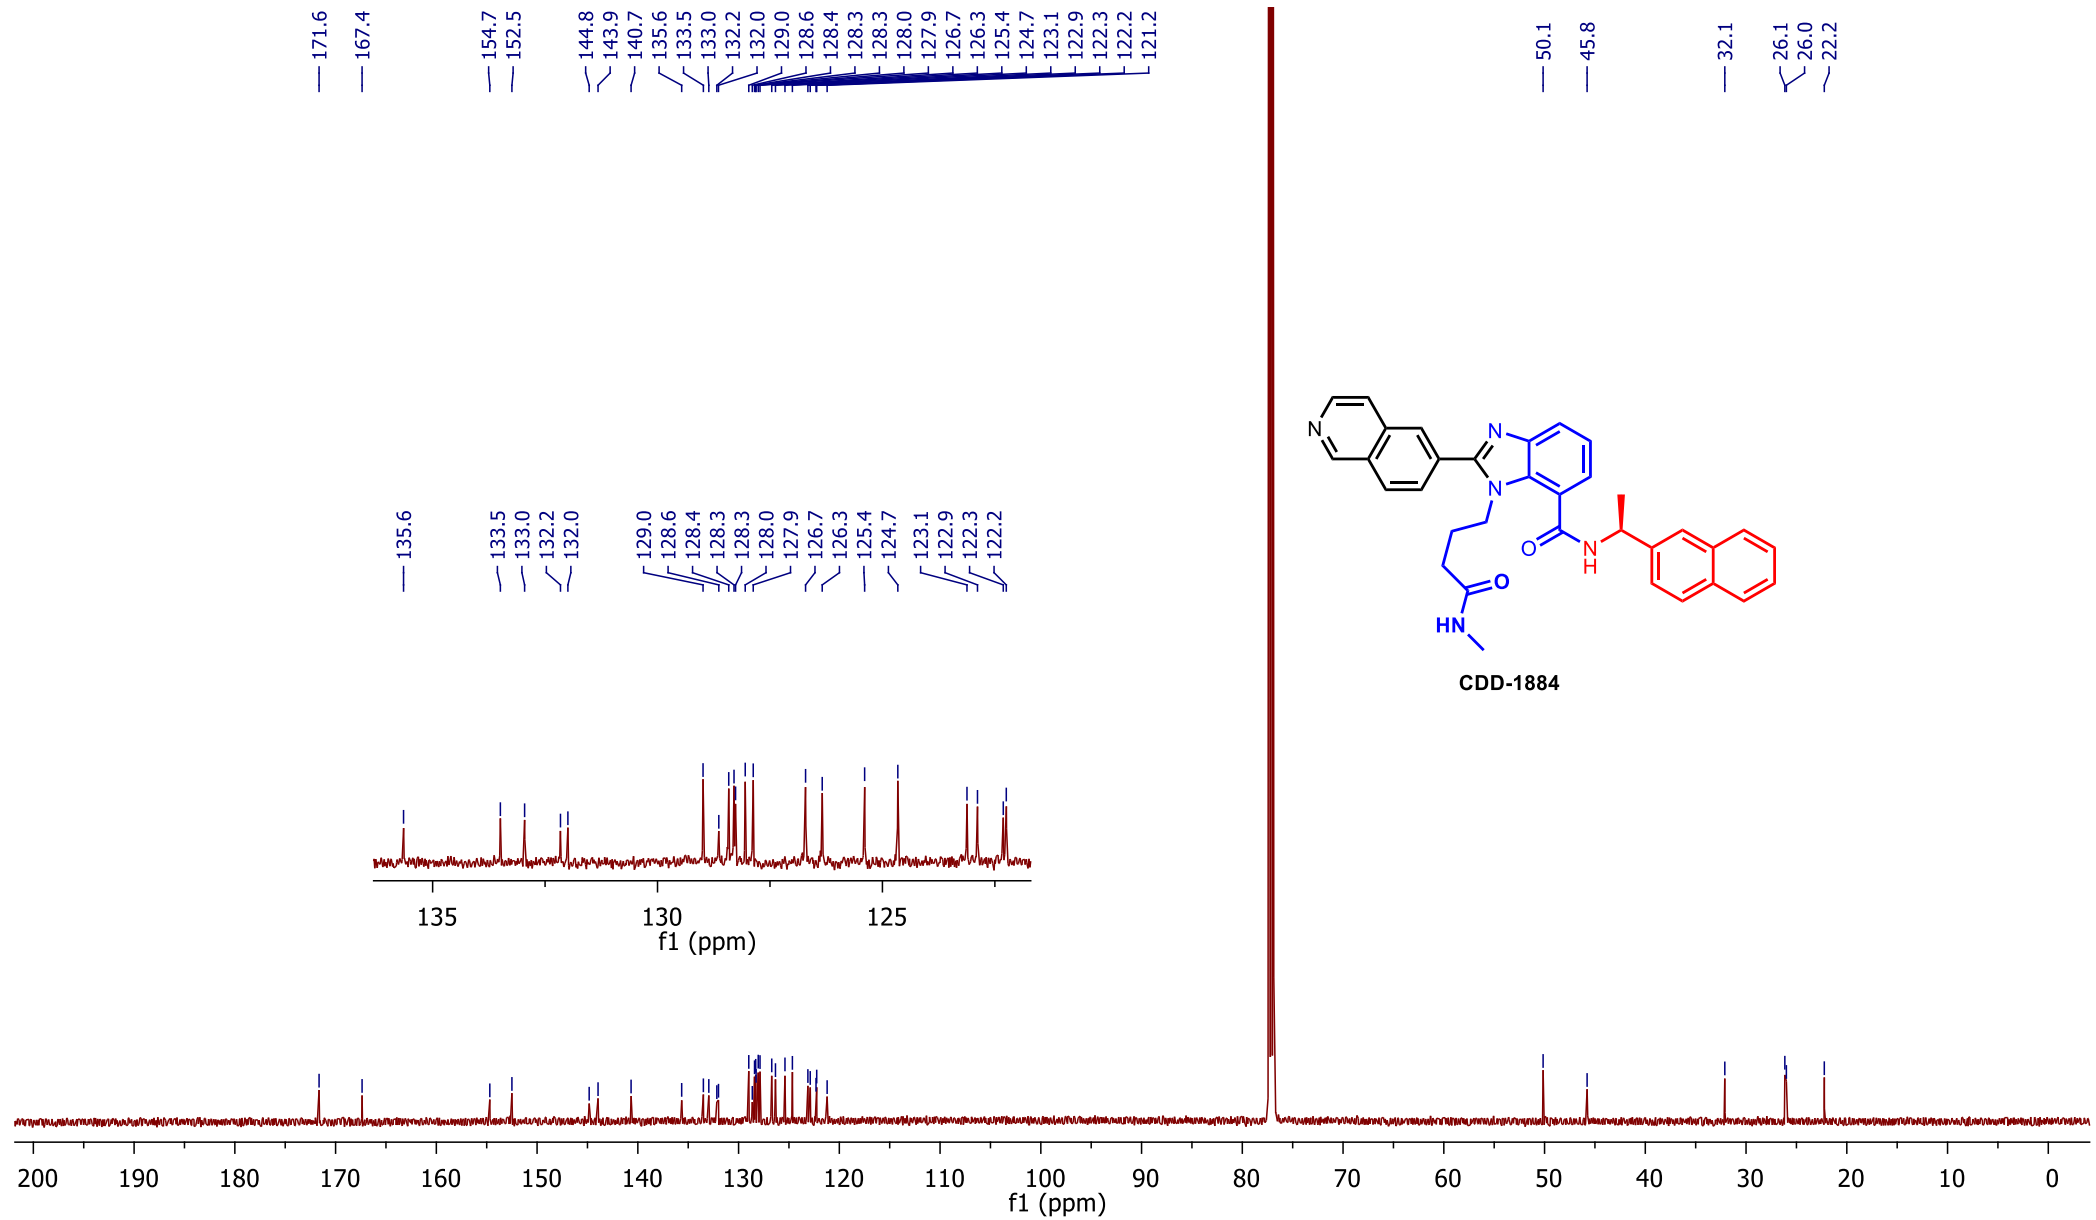

RT: 0.00 - 7.00

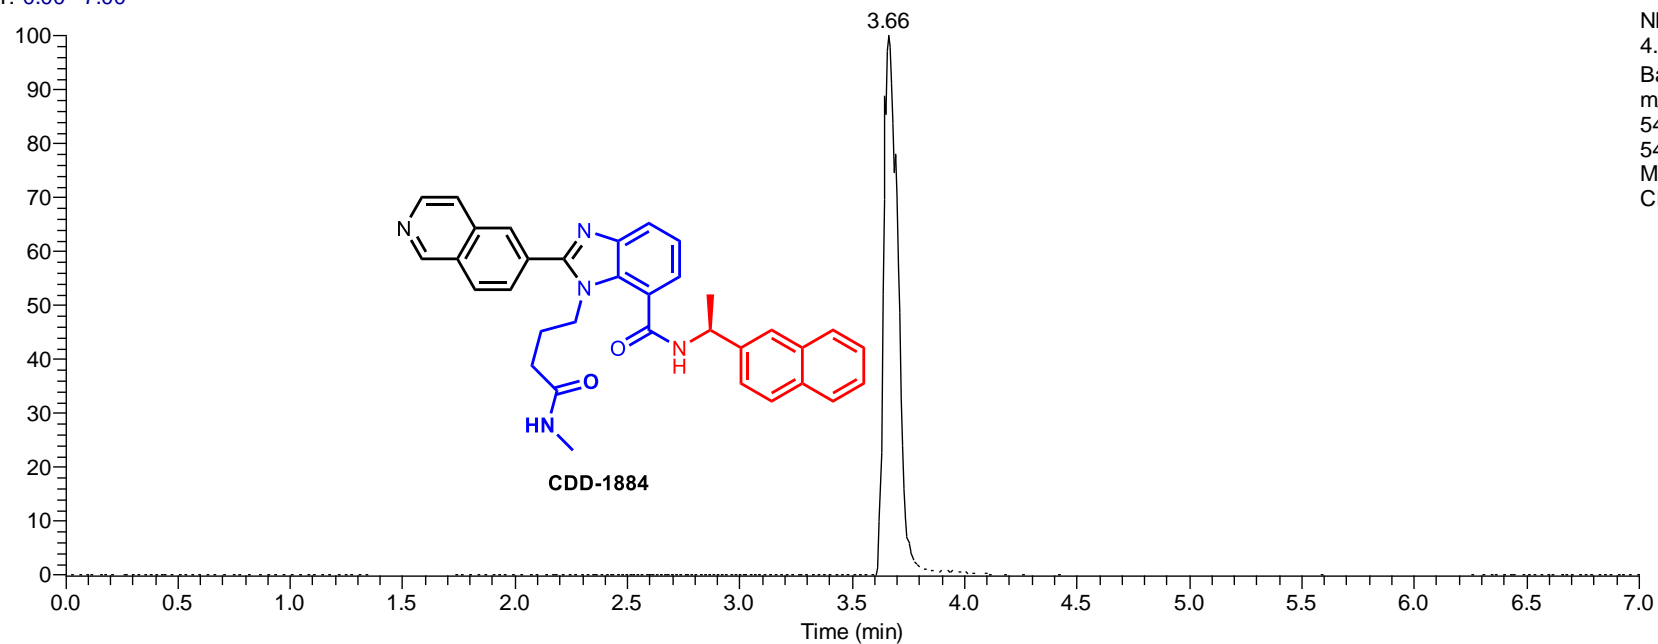

CDD1884 #472 RT: 3.66 AV: 1 NL: 6.51E8  
T: FTMS + p ESI Full ms [100.0000-1000.0000]

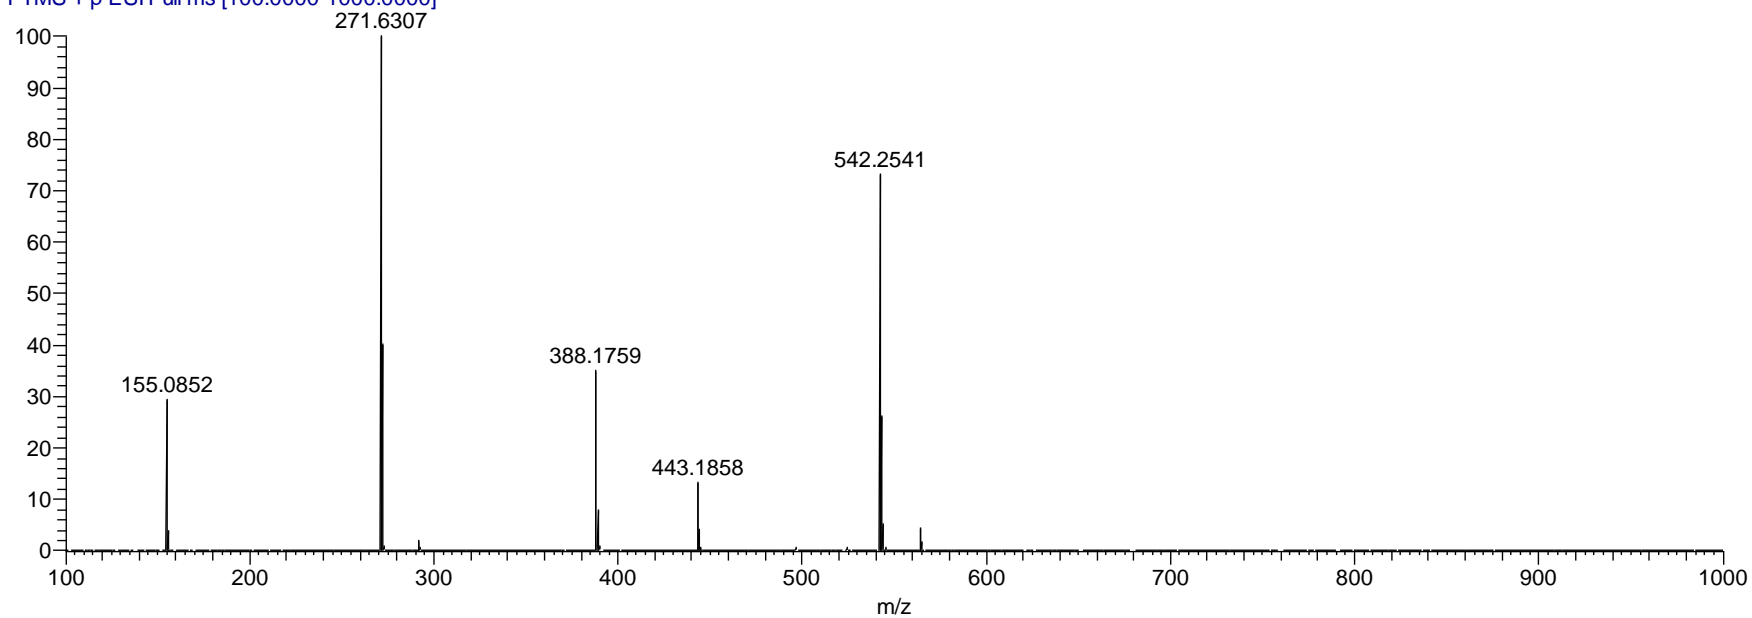

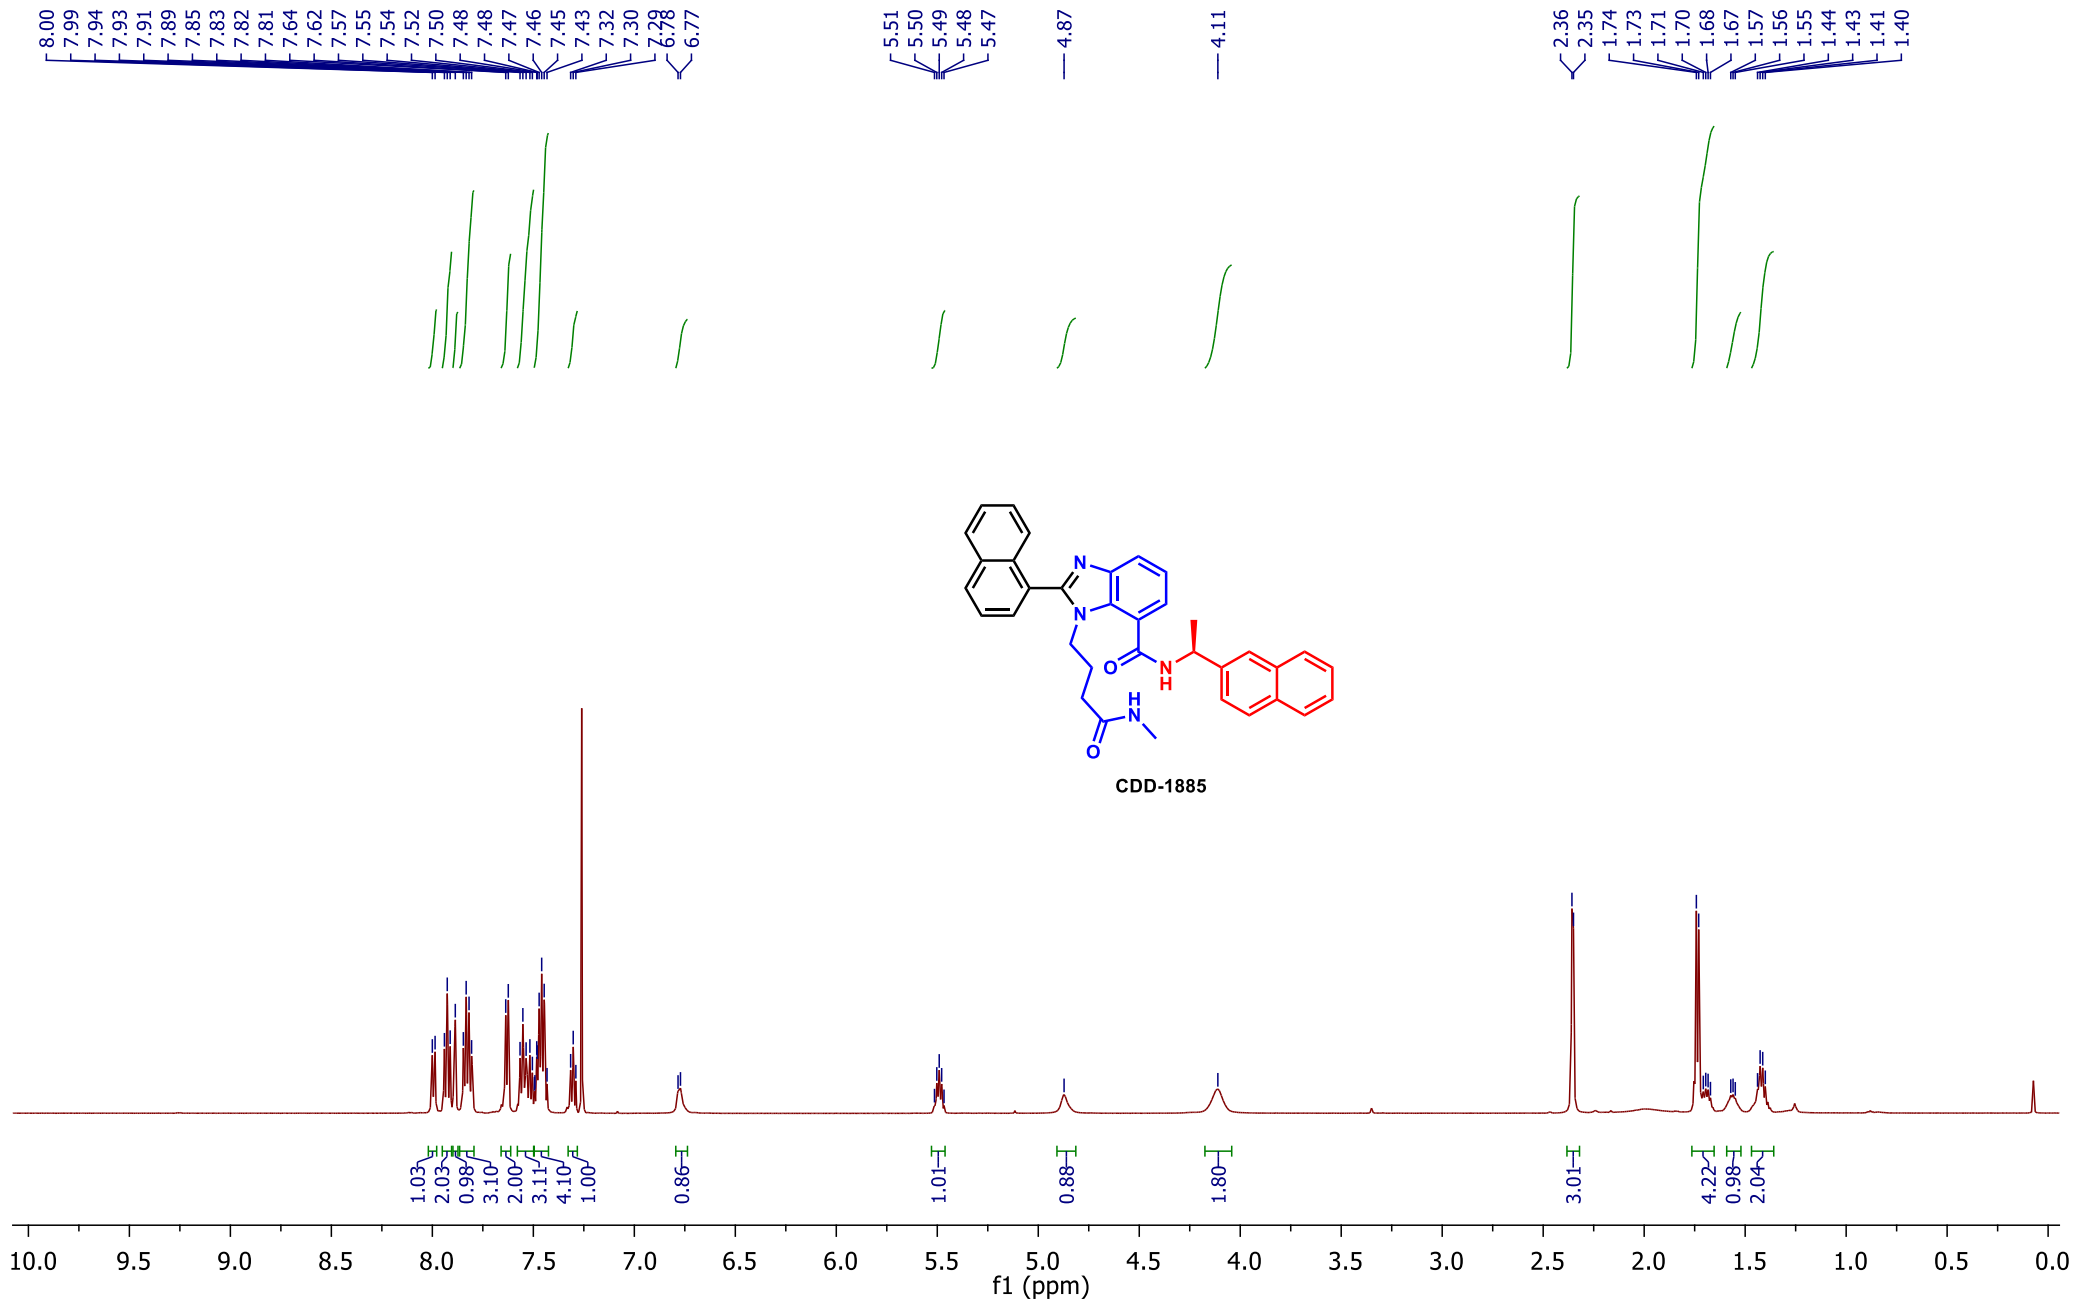

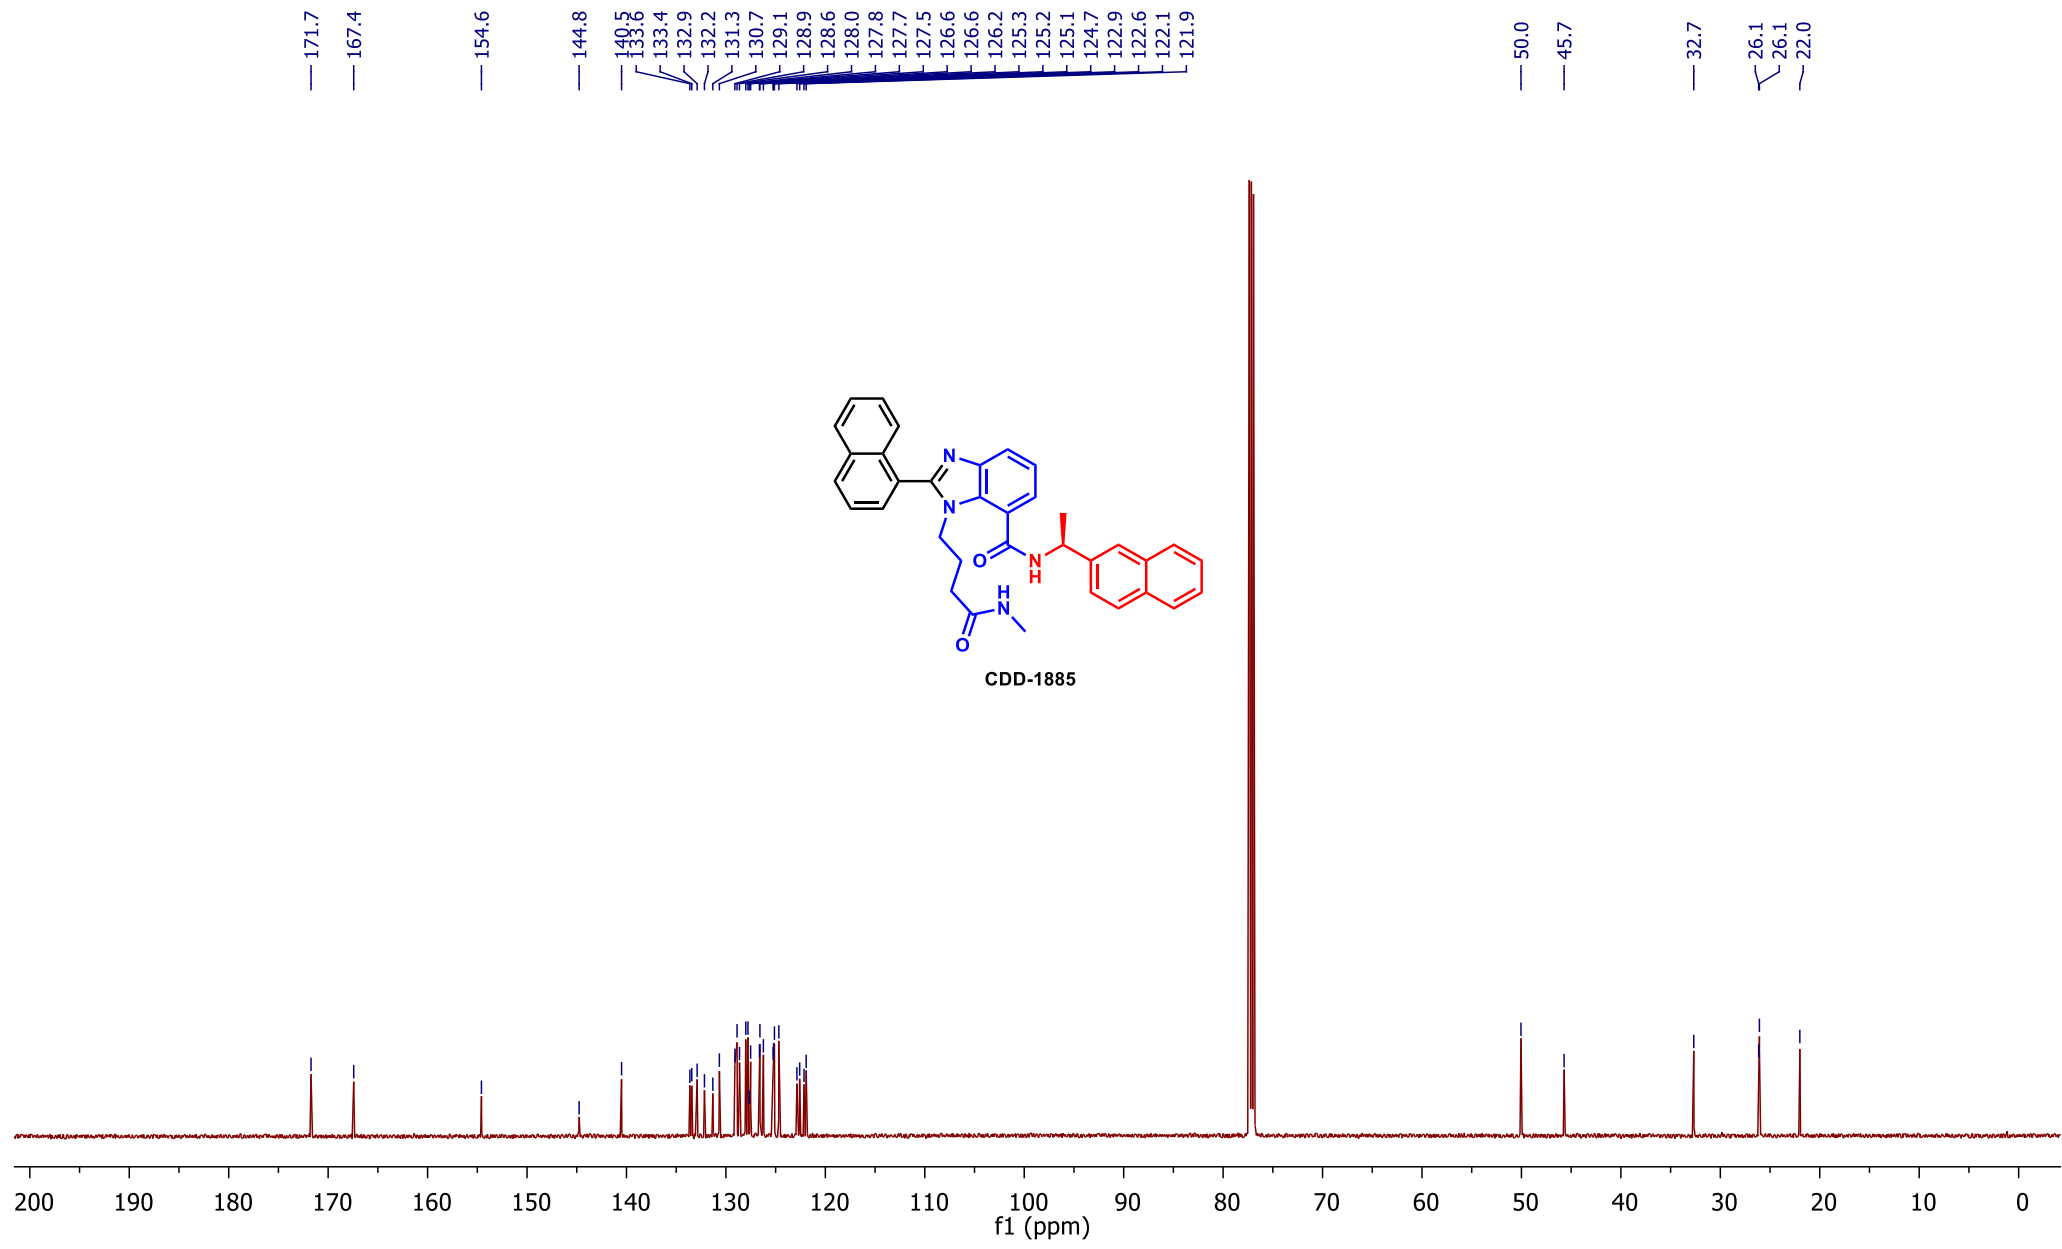

RT: 0.00 - 7.01

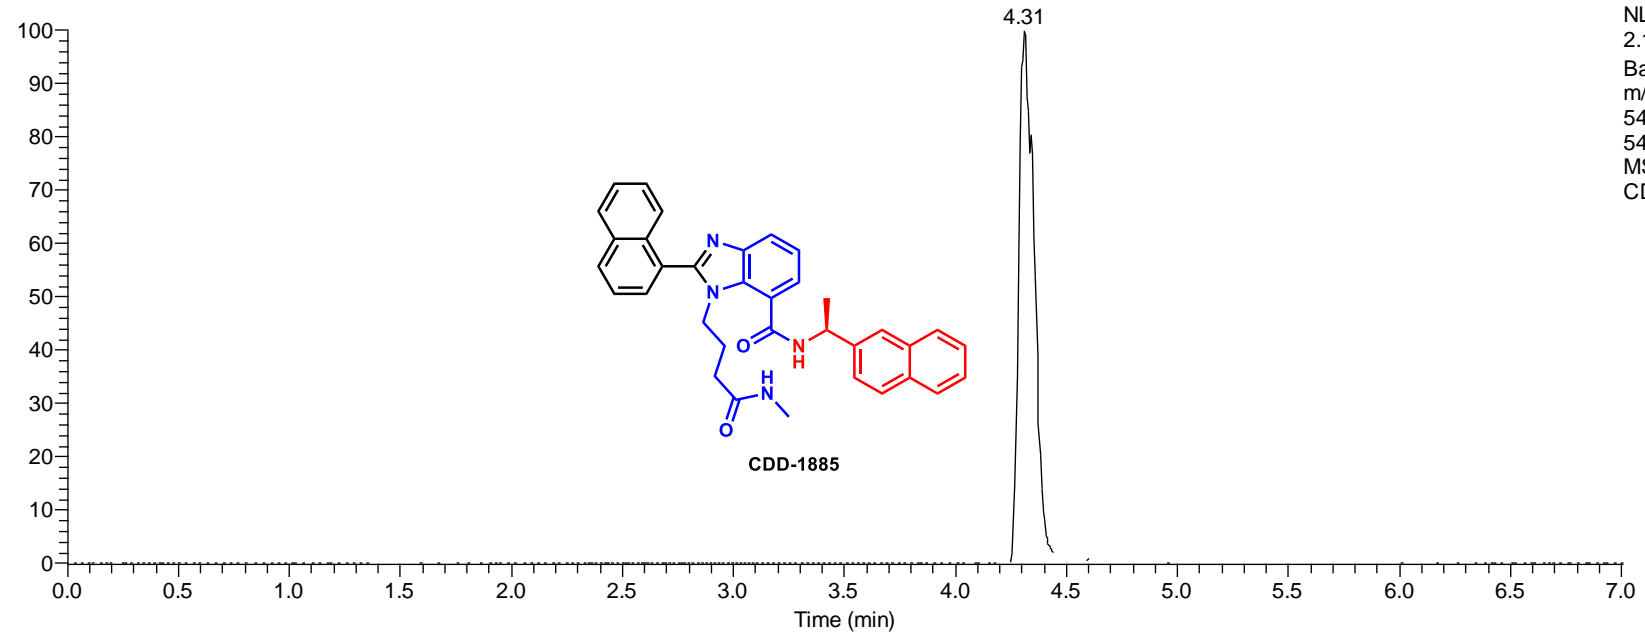

NL:  
2.12E9  
Base Peak  
m/z=  
540.7598-  
541.7598  
MS  
CDD1885

CDD1885 #556 RT: 4.31 AV: 1 NL: 2.12E9  
T: FTMS + p ESI Full ms [100.0000-1000.0000]

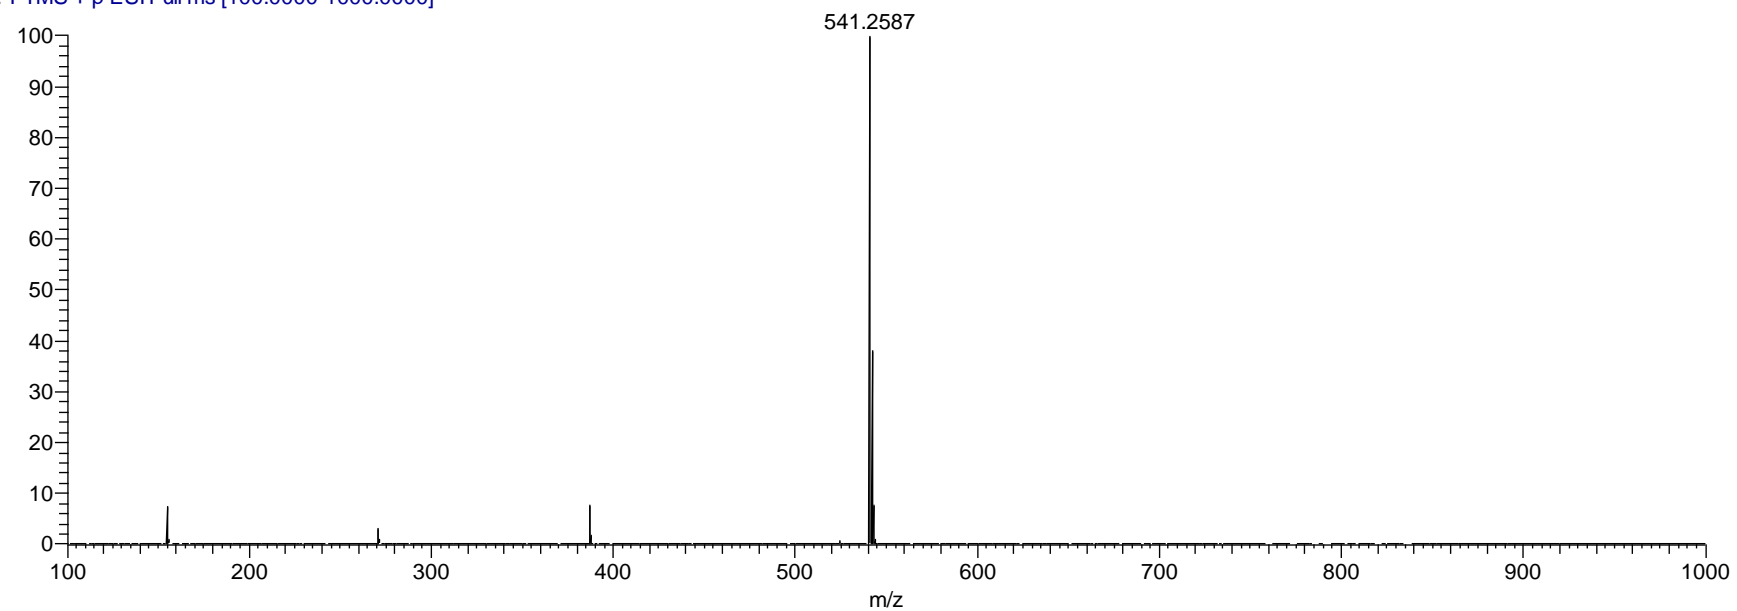

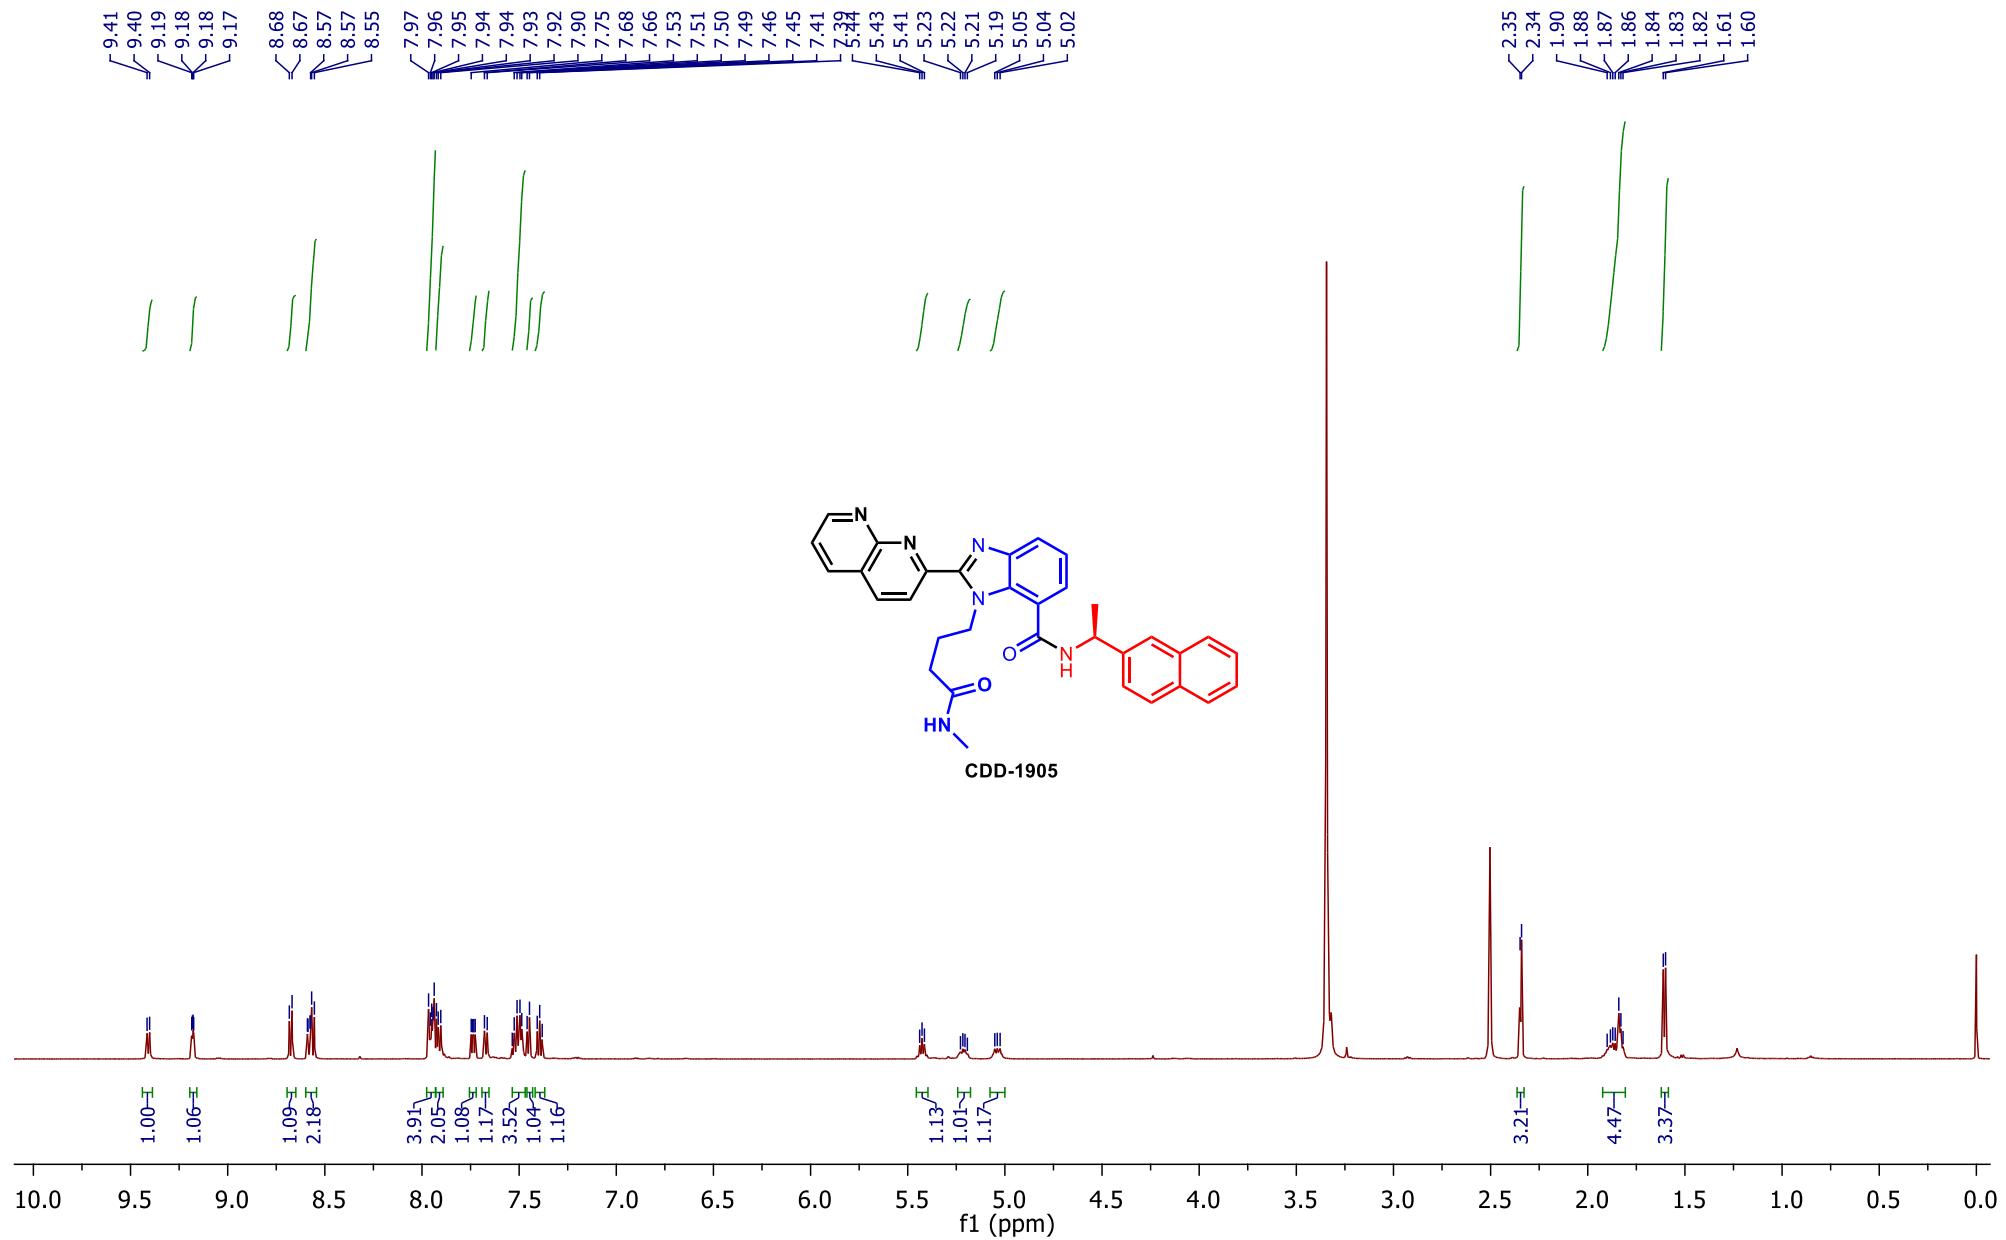

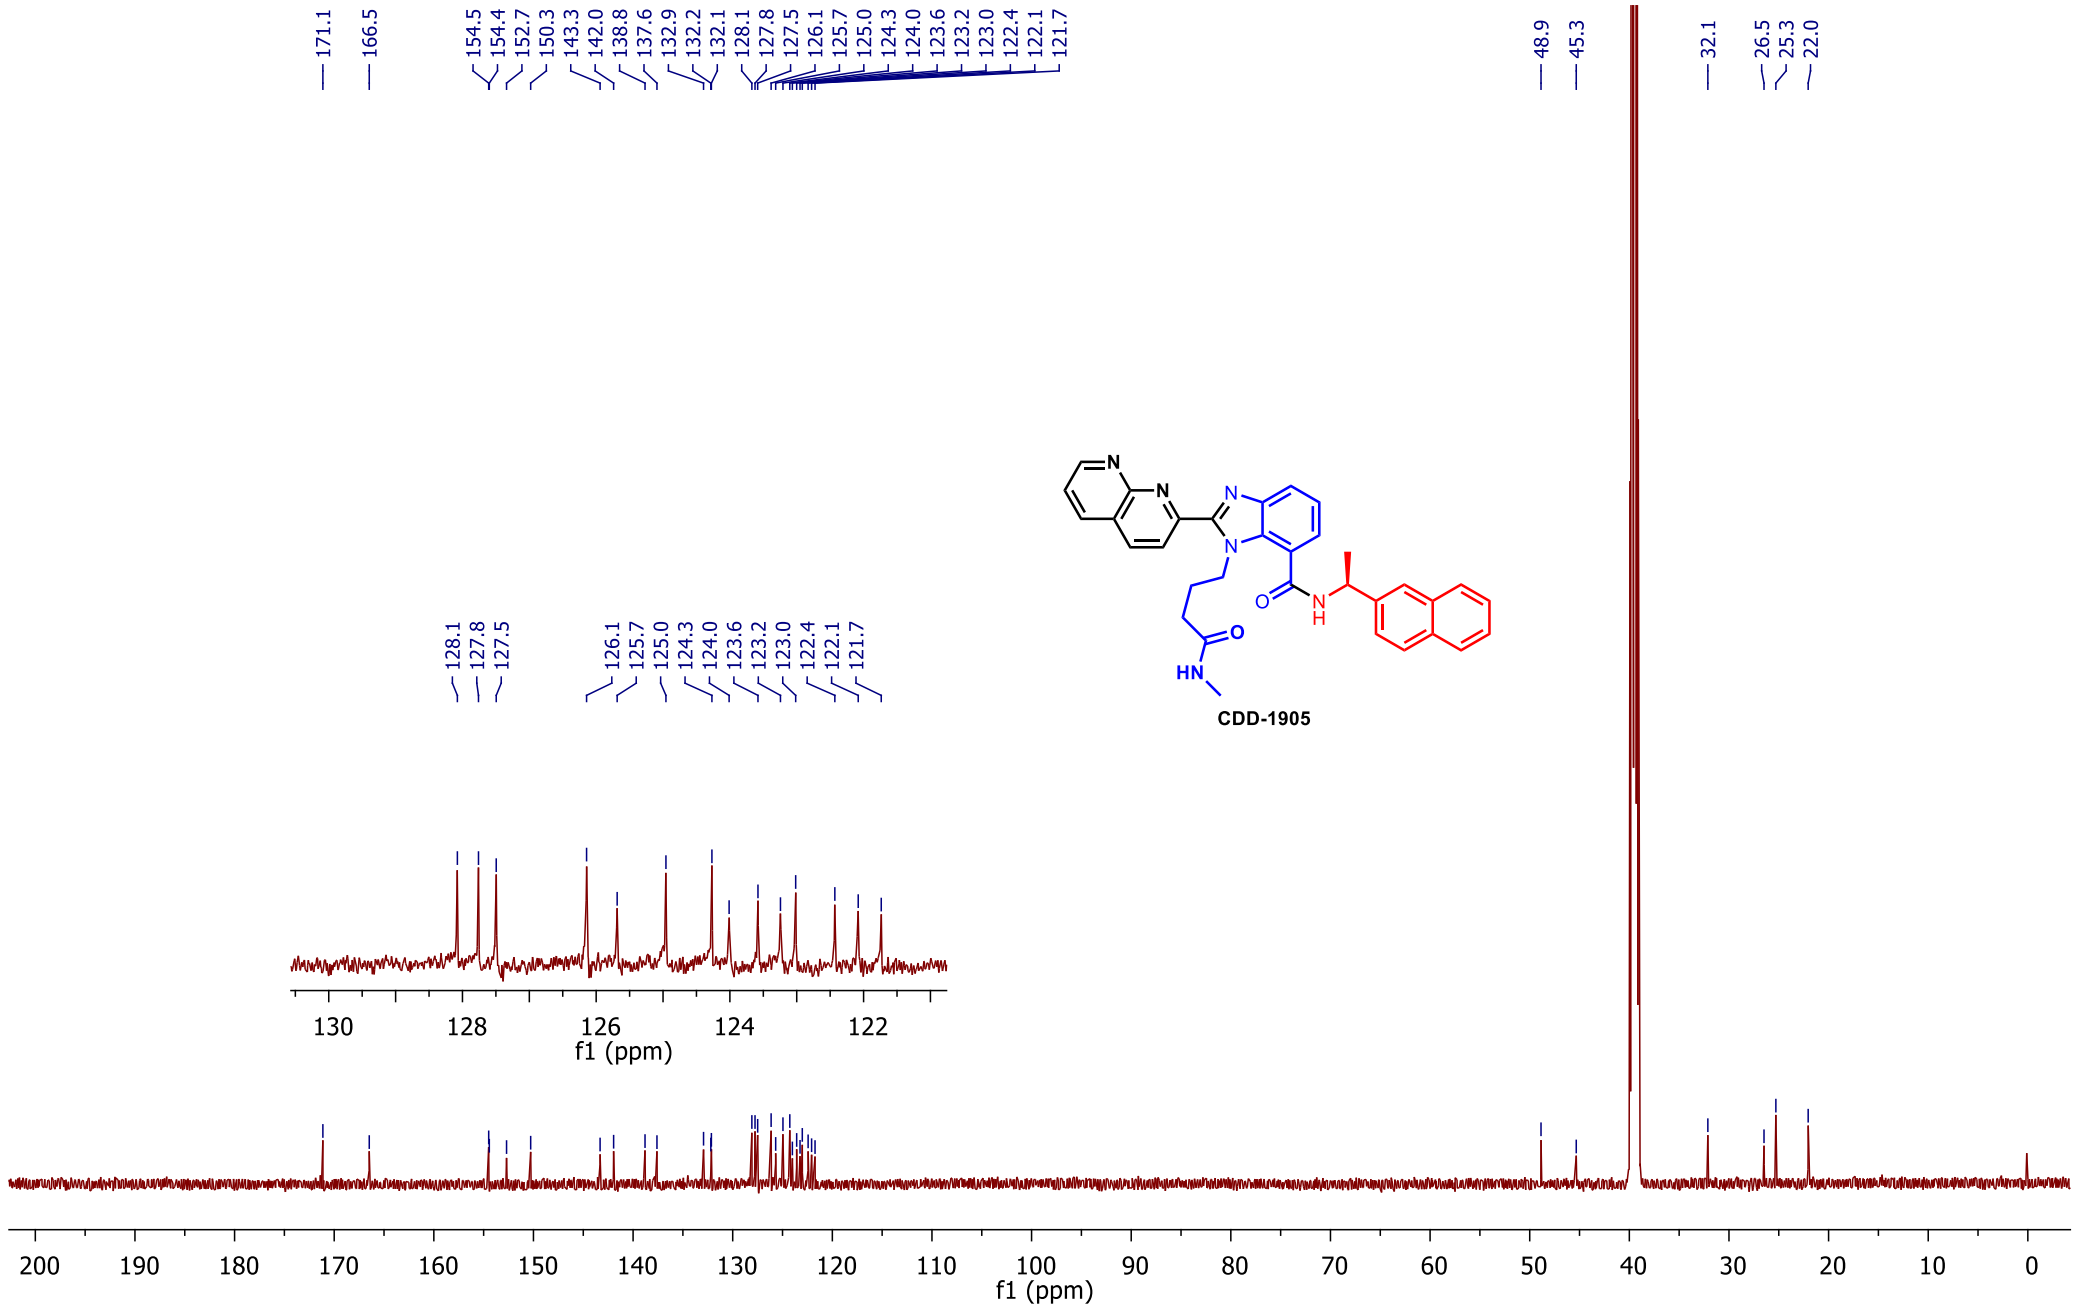

RT: 0.00 - 7.01

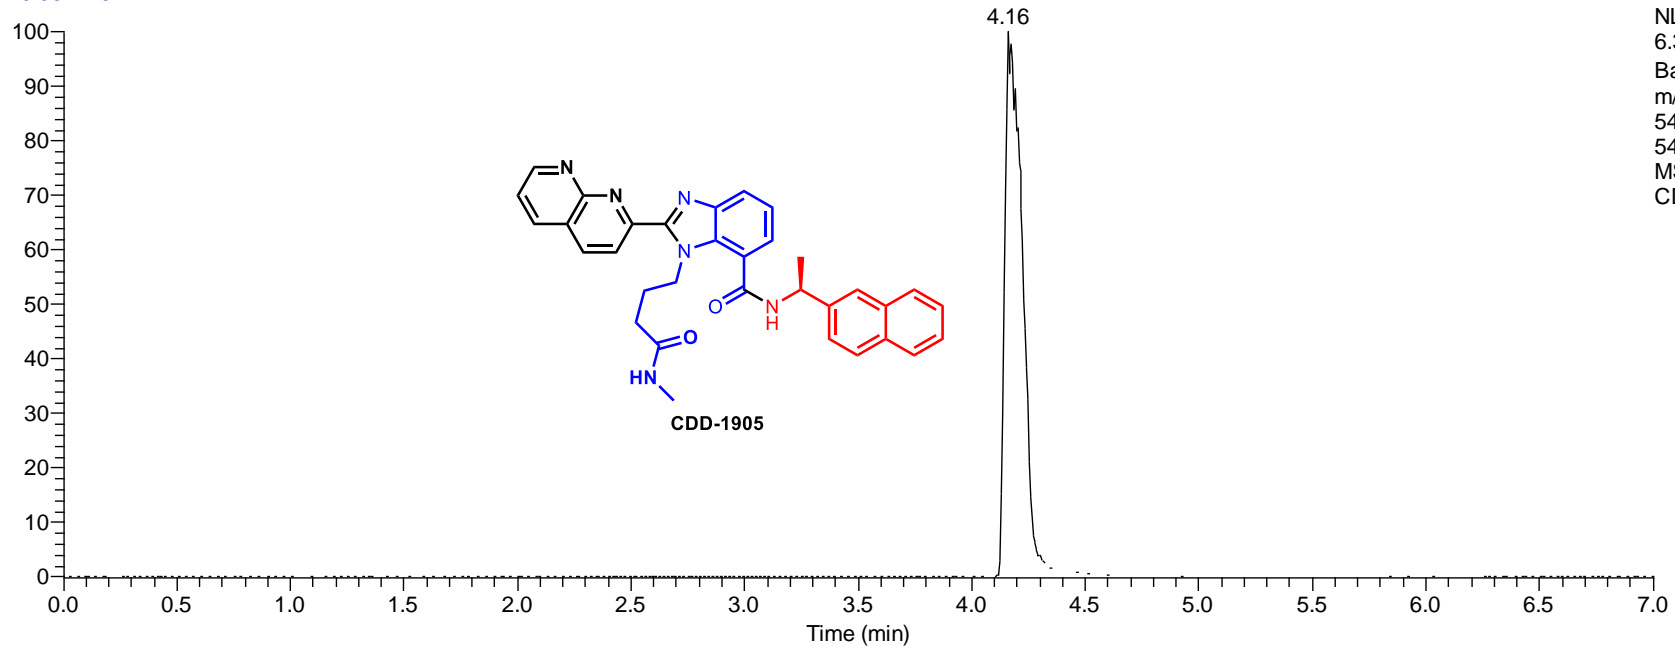

NL:  
6.37E8  
Base Peak  
m/z=  
542.7503-  
543.7503  
MS  
CDD1905

CDD1905 #529 RT: 4.16 AV: 1 NL: 5.89E8  
T: FTMS + p ESI Full ms [100.0000-1000.0000]

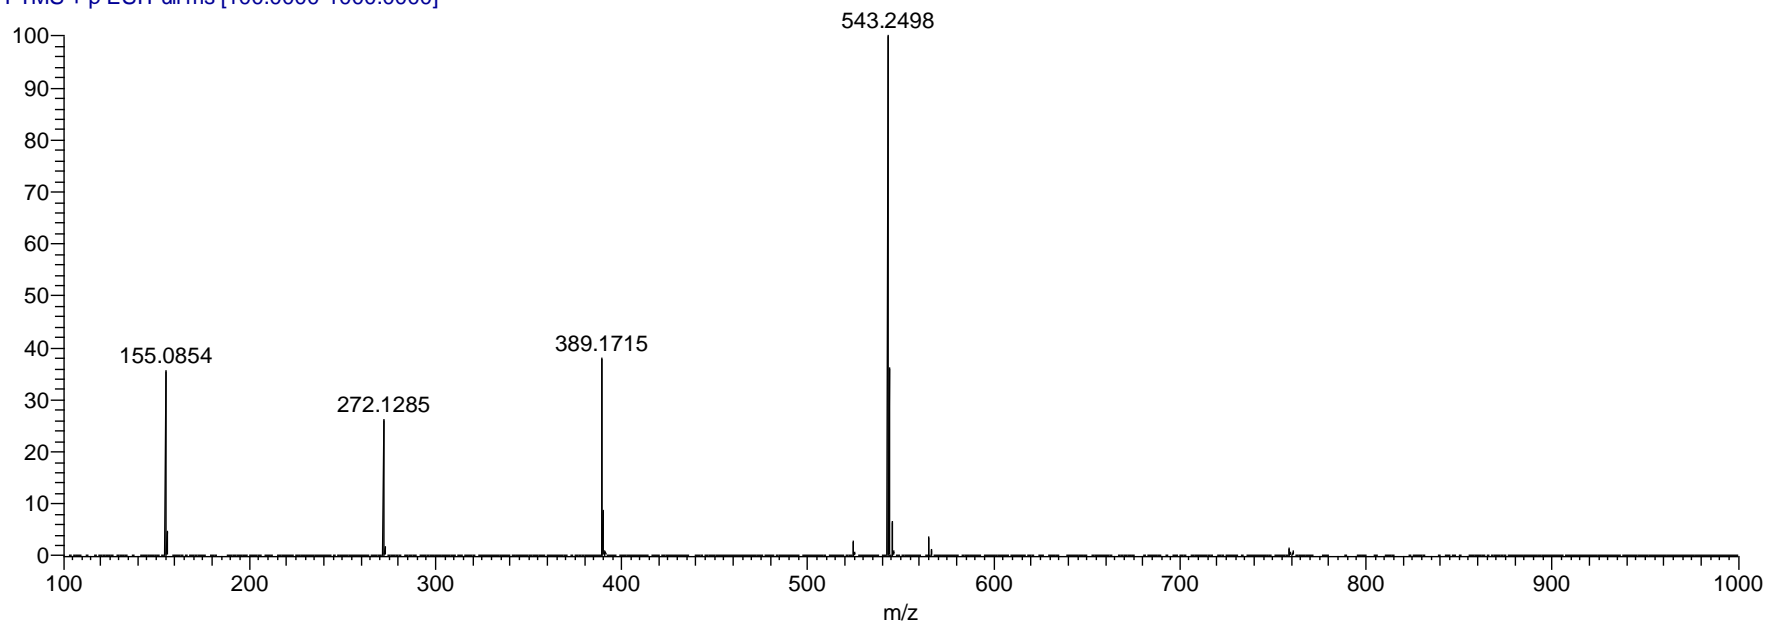



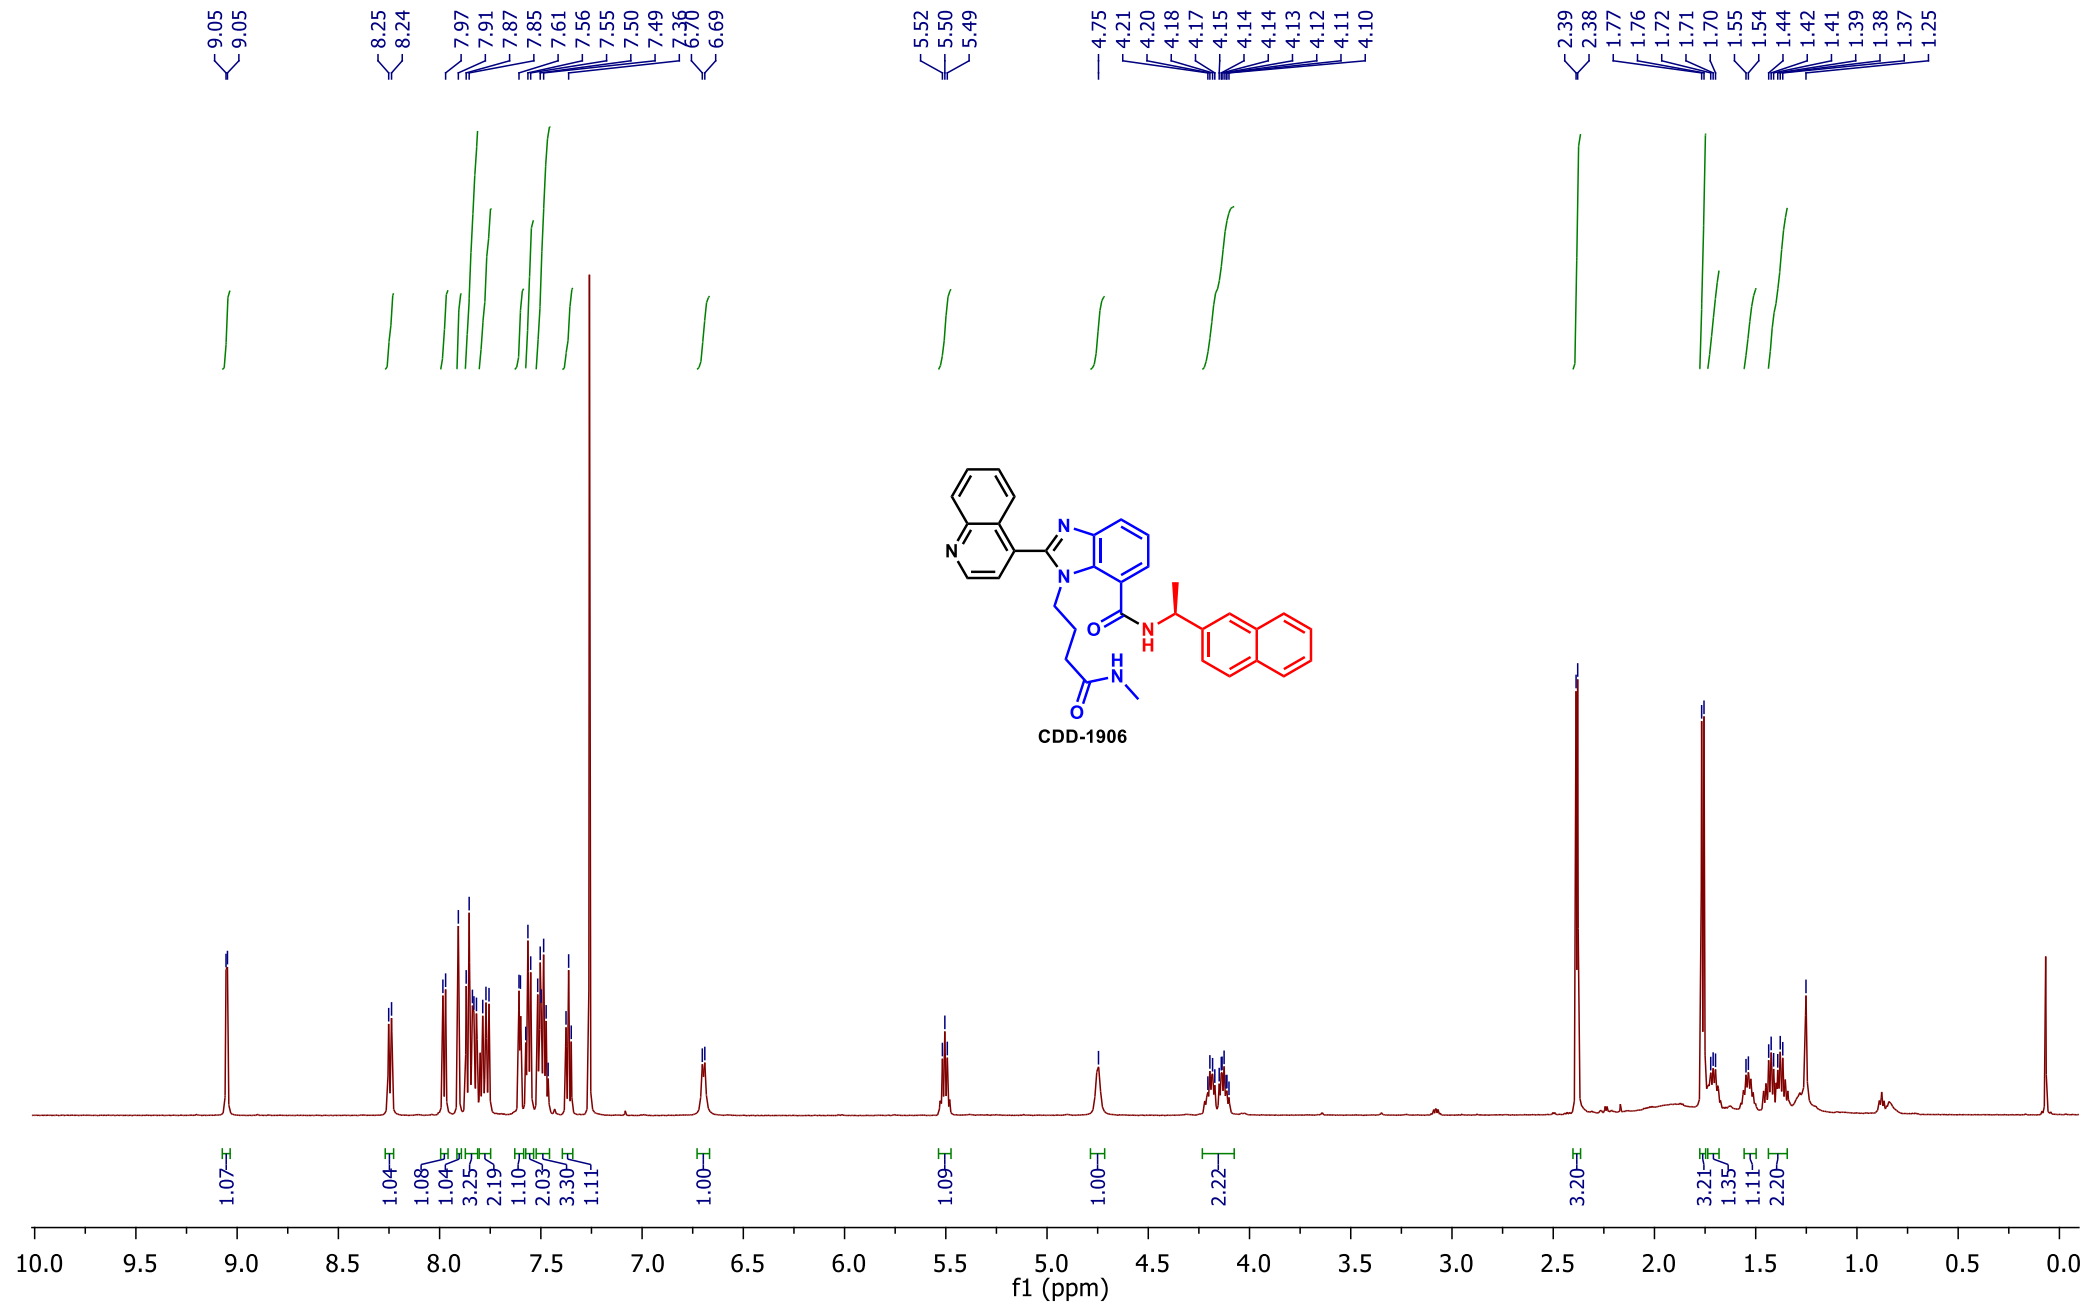

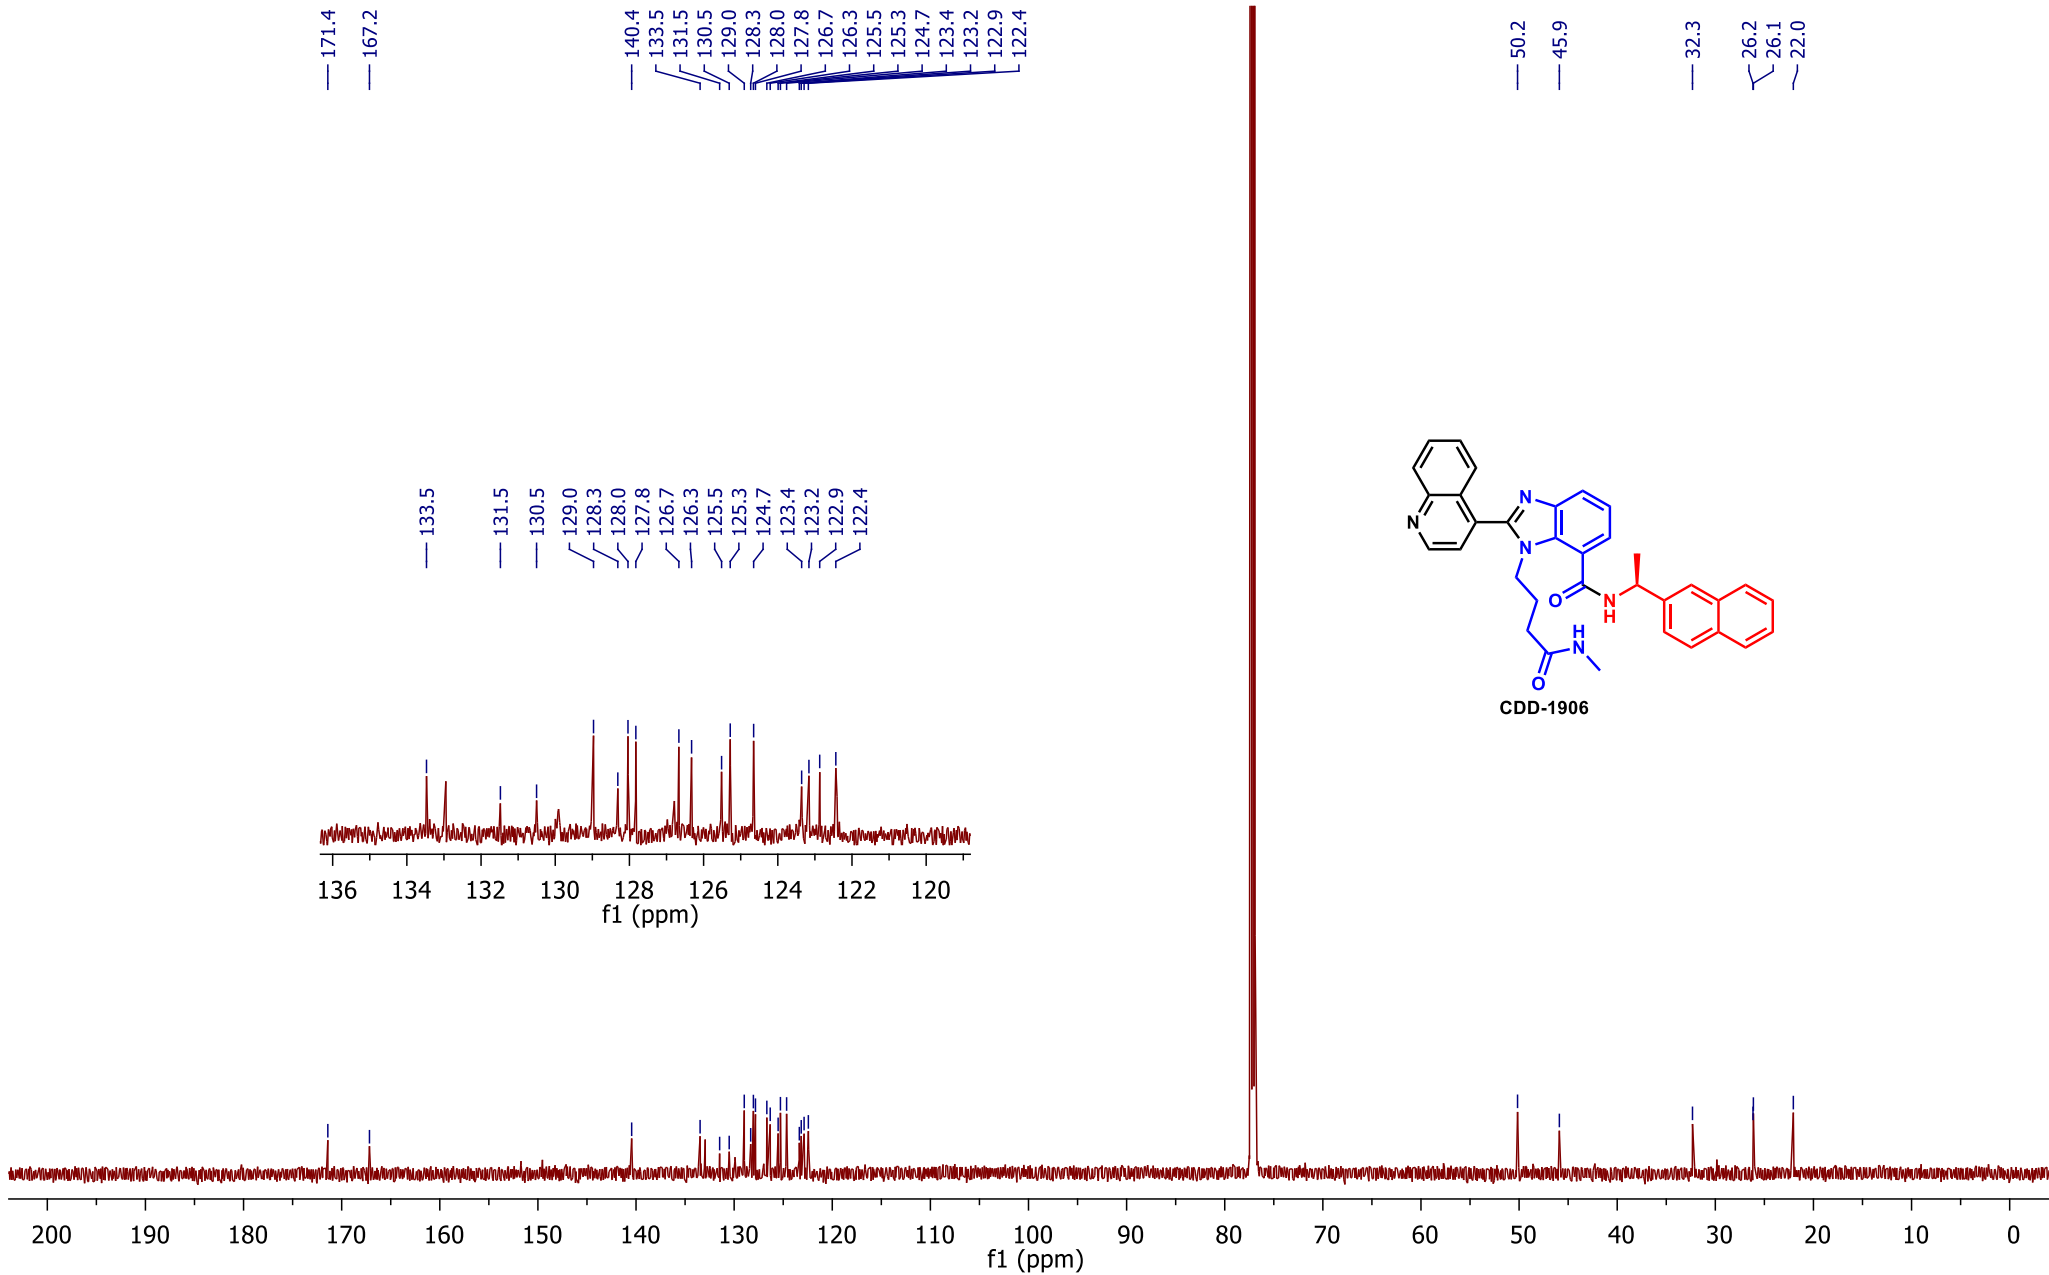

RT: 0.00 - 7.00

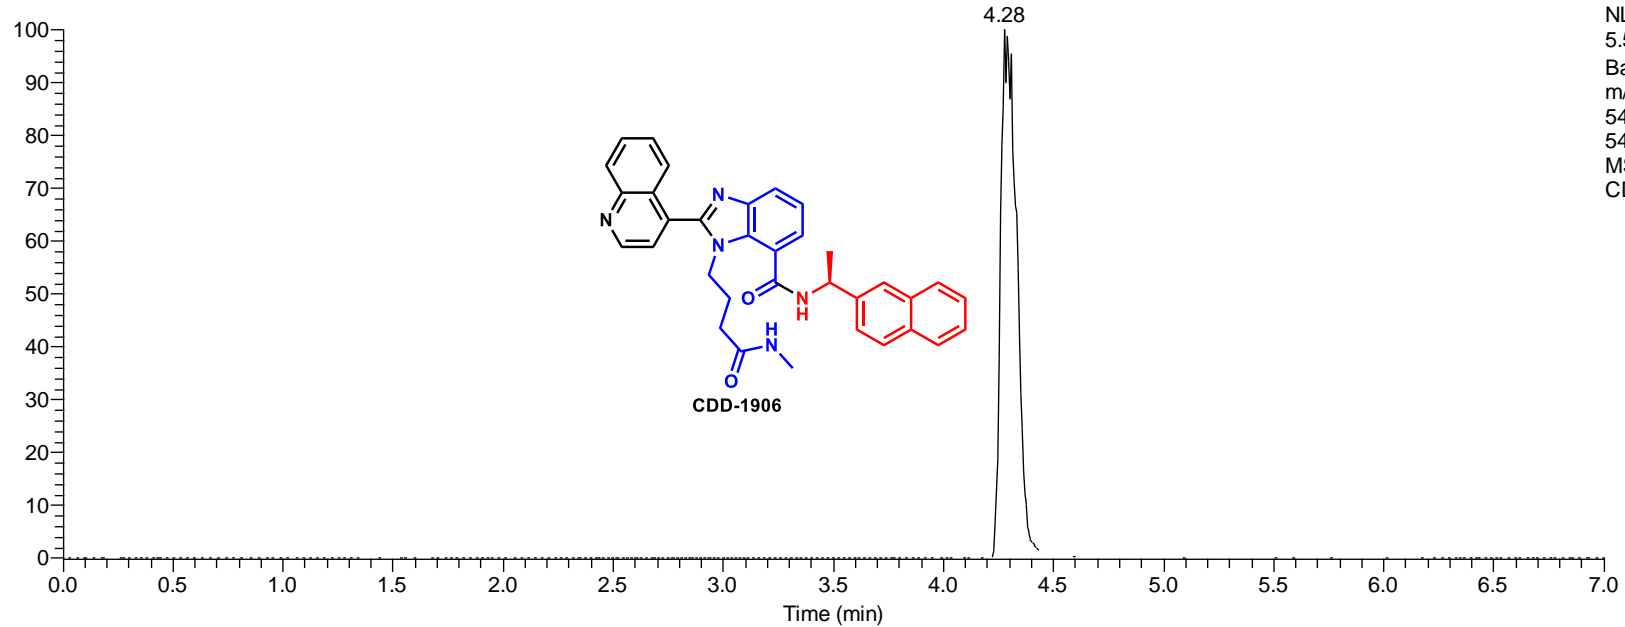

NL:  
5.56E8  
Base Peak  
m/z=  
541.7551-  
542.7551  
MS  
CDD1906

CDD1906 #542 RT: 4.28 AV: 1 NL: 4.99E8  
T: FTMS + p ESI Full ms [100.0000-1000.0000]

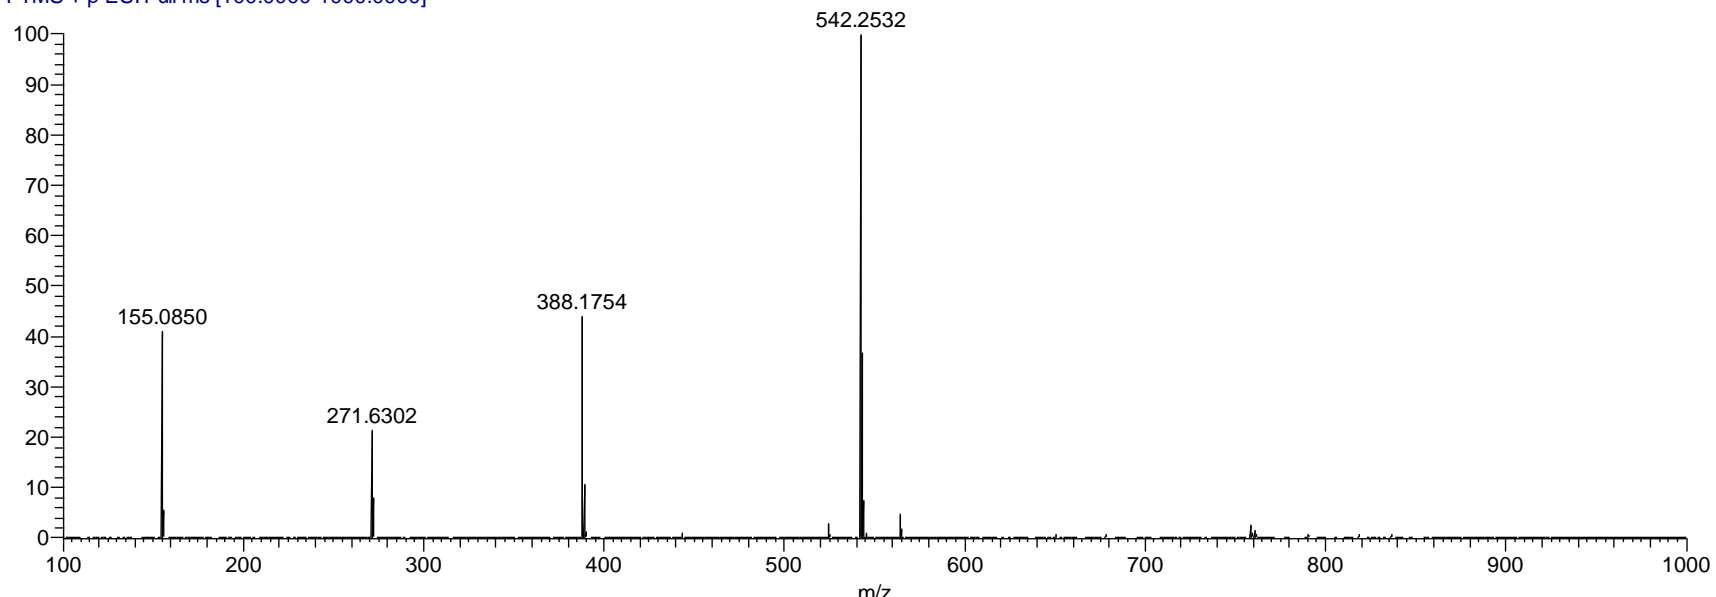

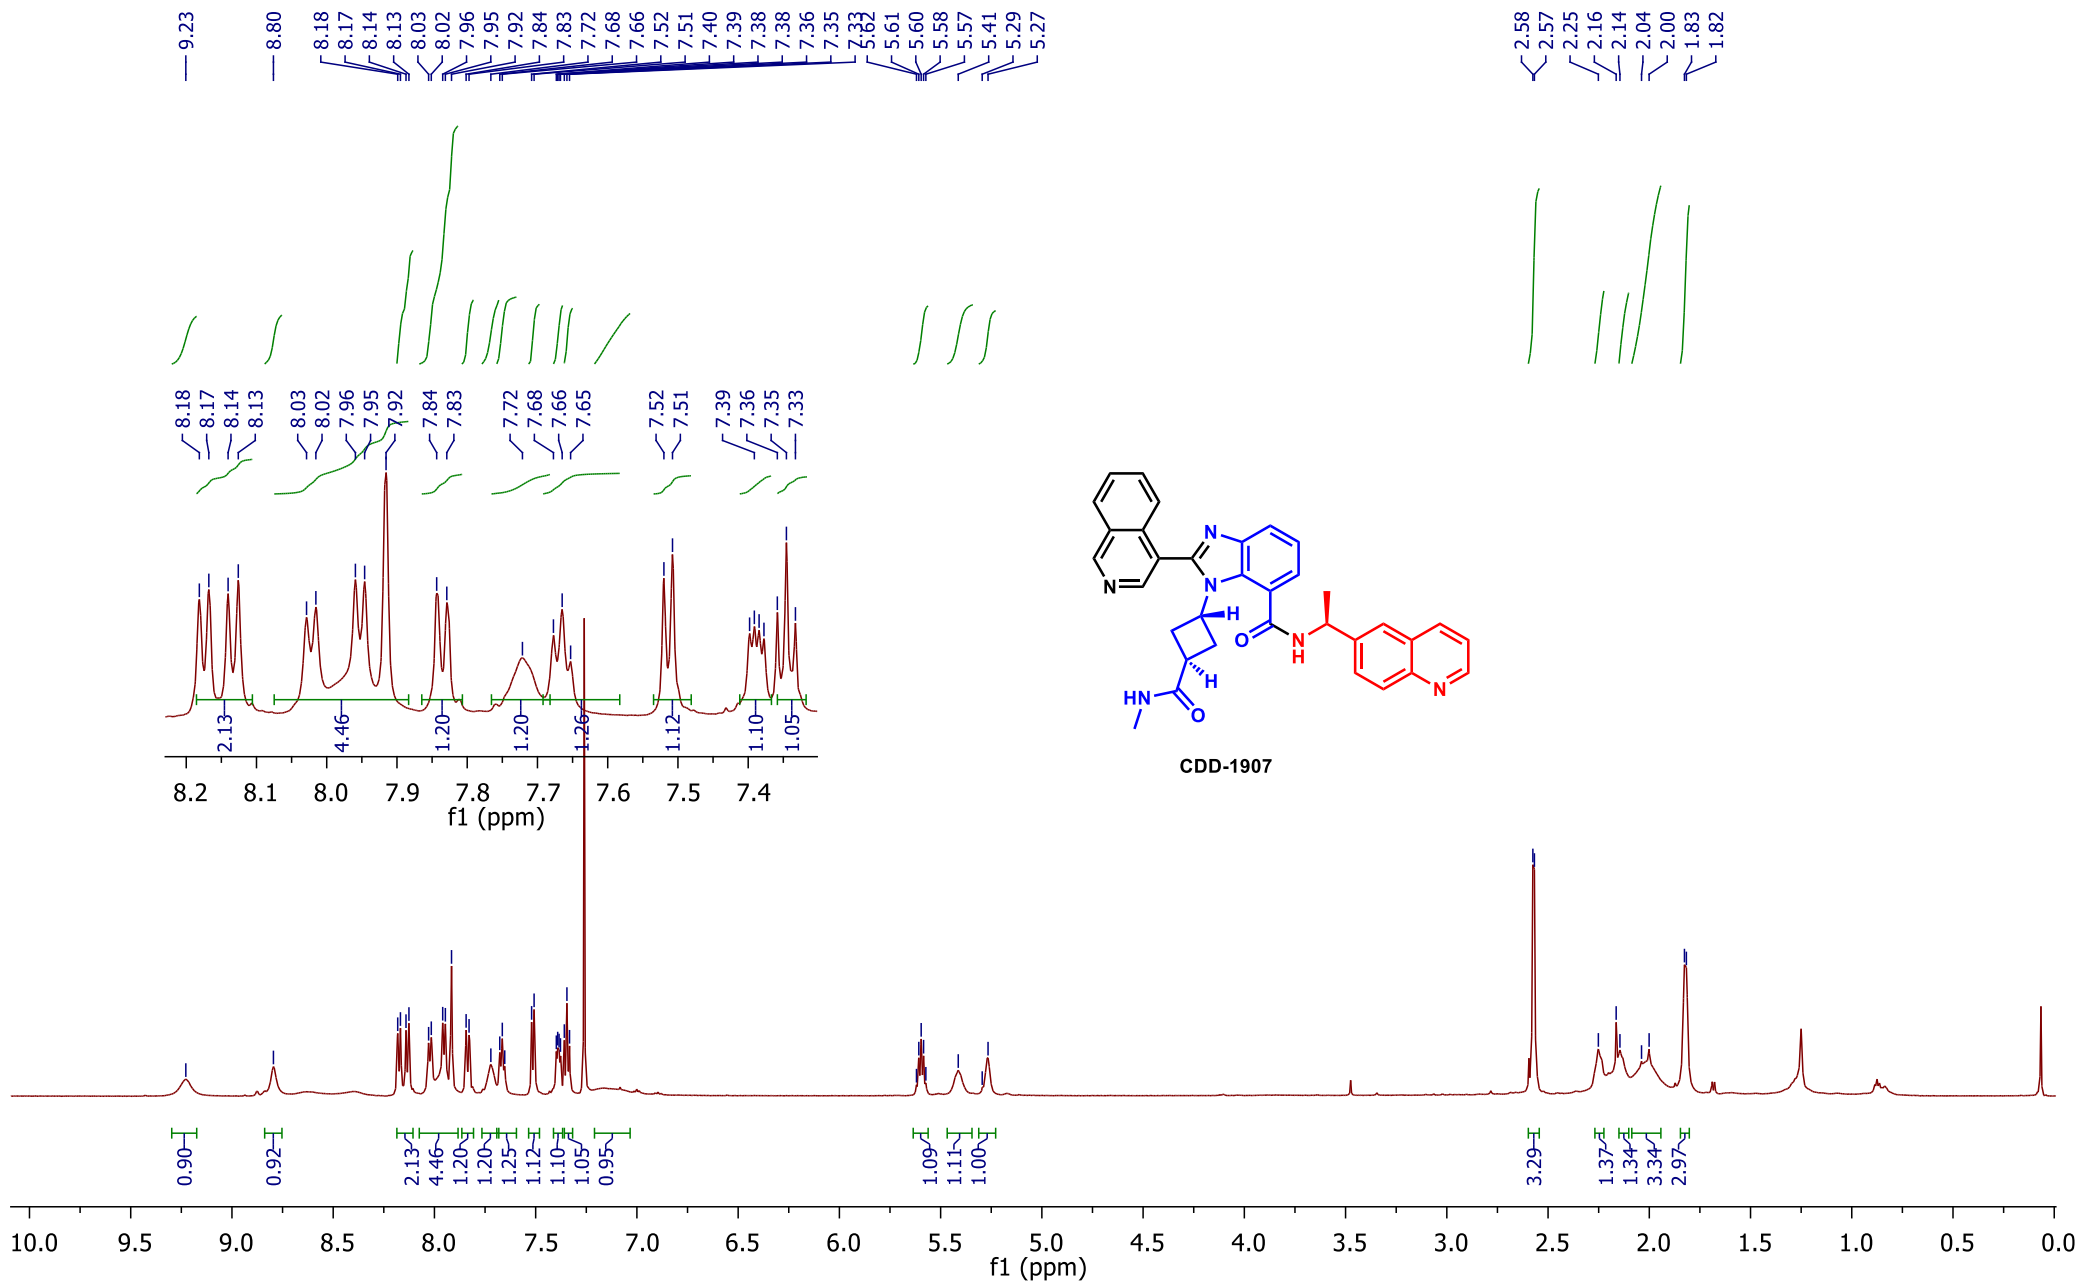

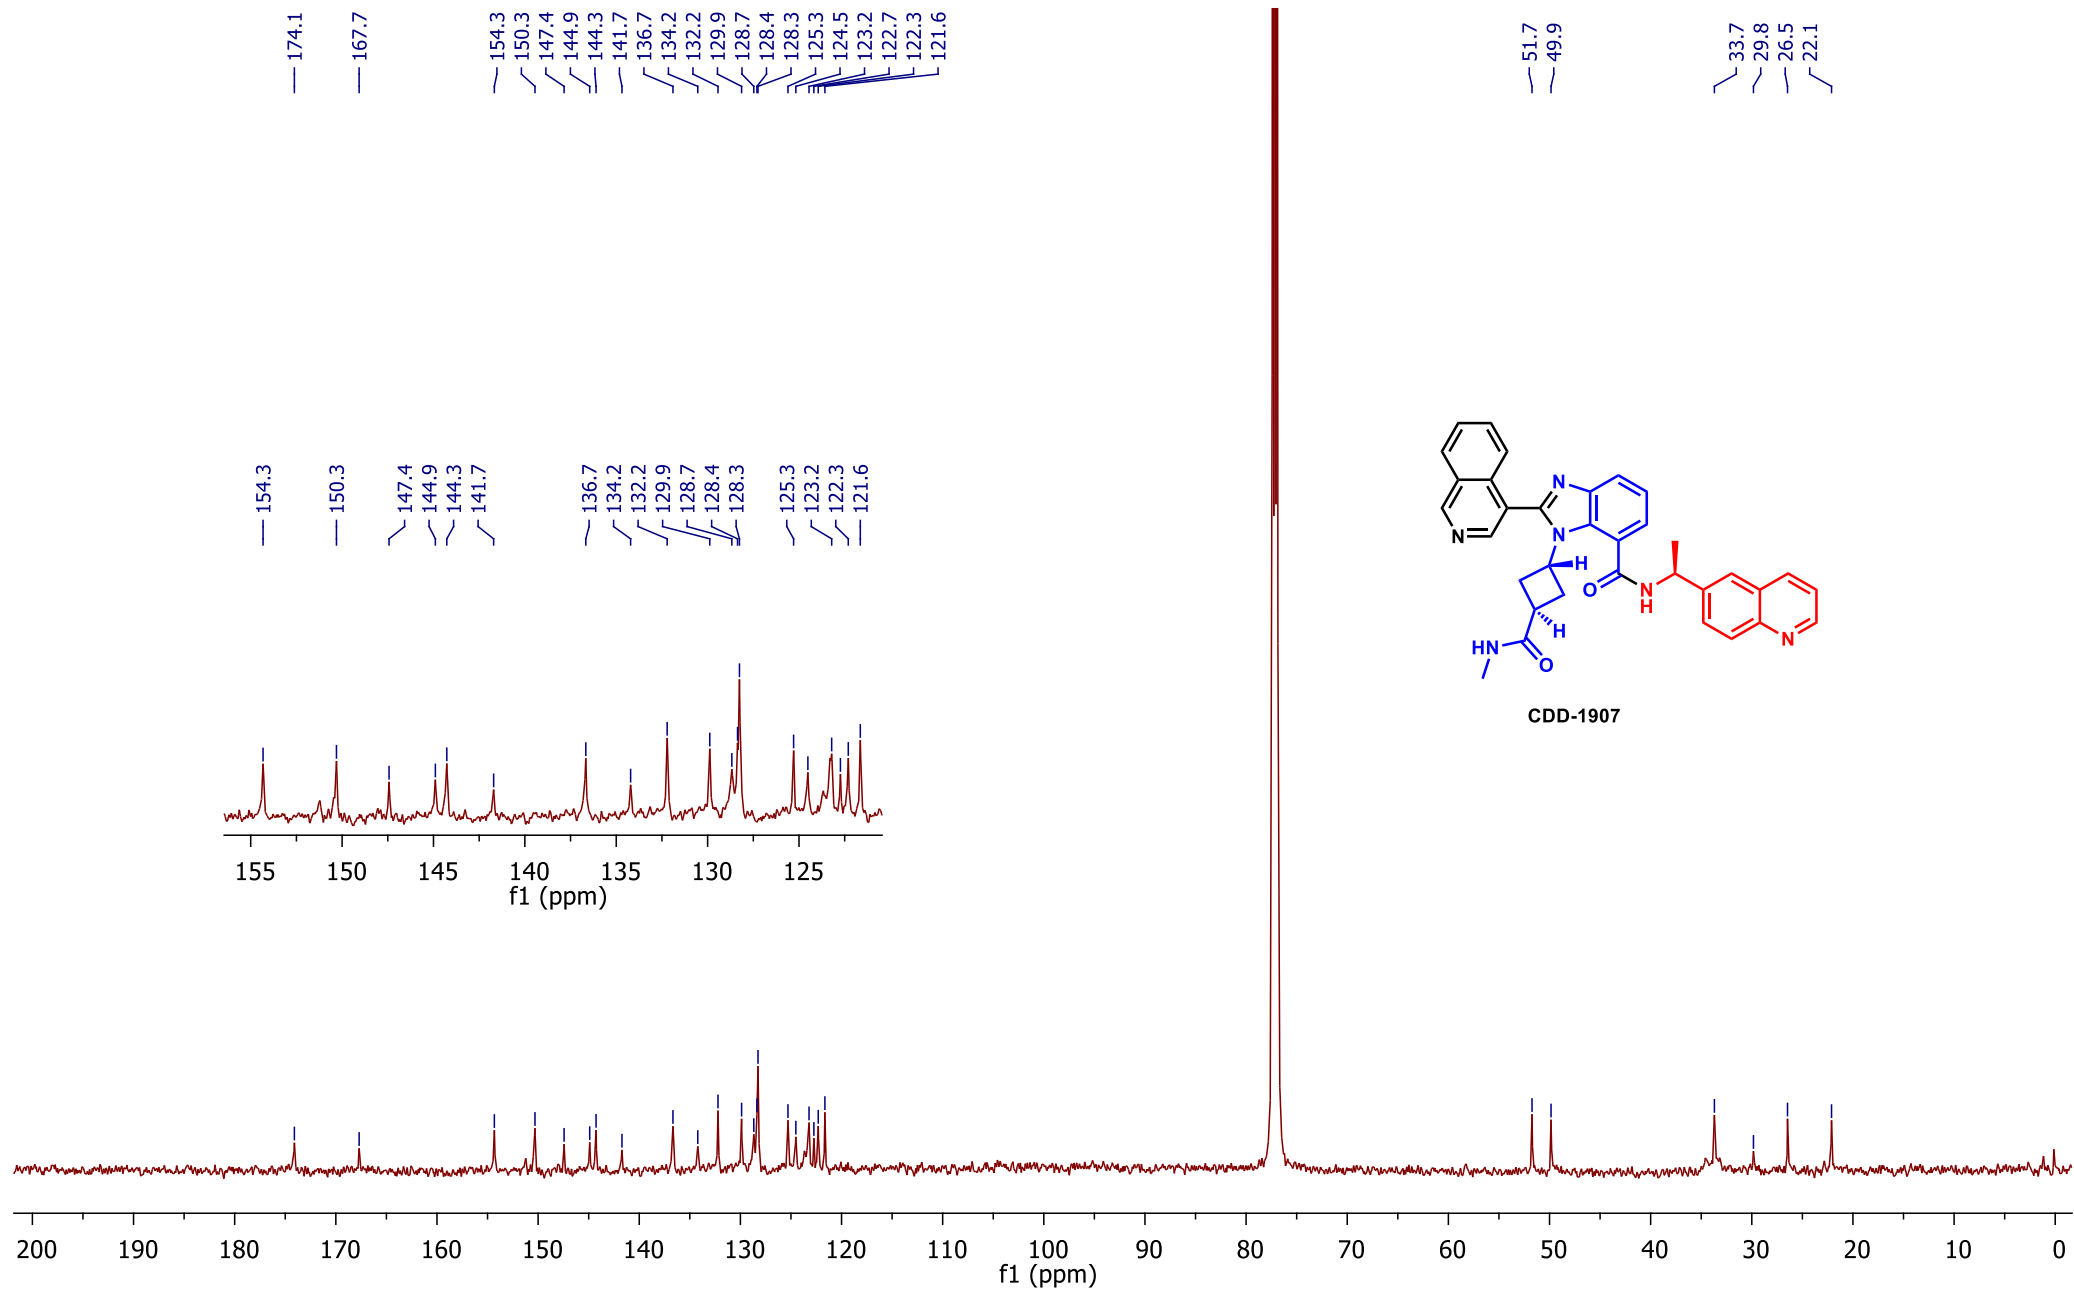

RT: 0.00 - 7.00

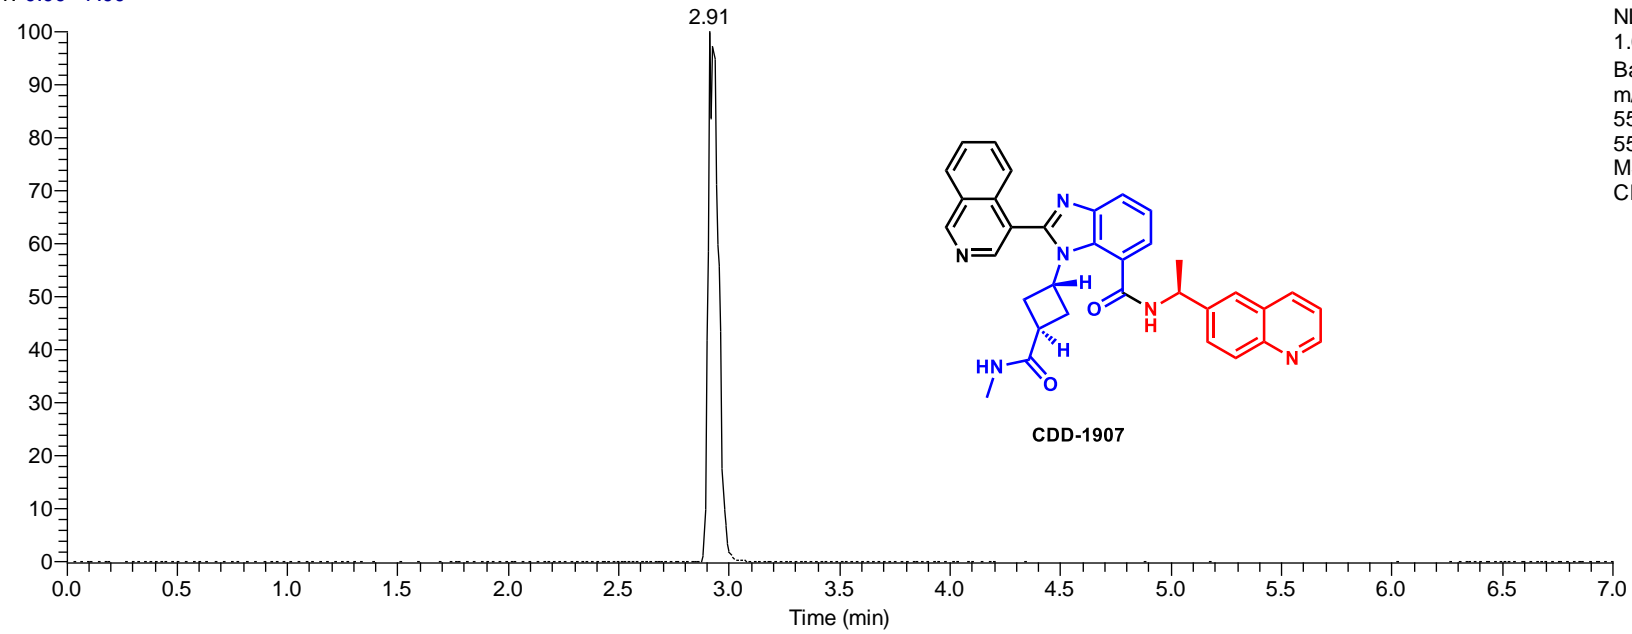

NL:  
1.04E8  
Base Peak  
m/z=  
554.7503-  
555.7503  
MS  
CDD1907

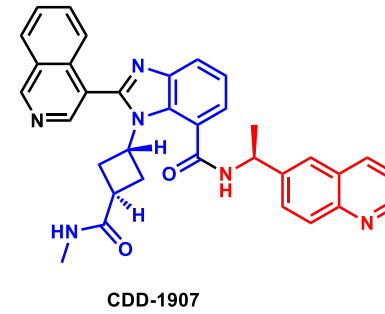

CDD1907 #376 RT: 2.91 AV: 1 NL: 6.74E8  
T: FTMS + p ESI Full lock ms [100.0000-1000.0000]

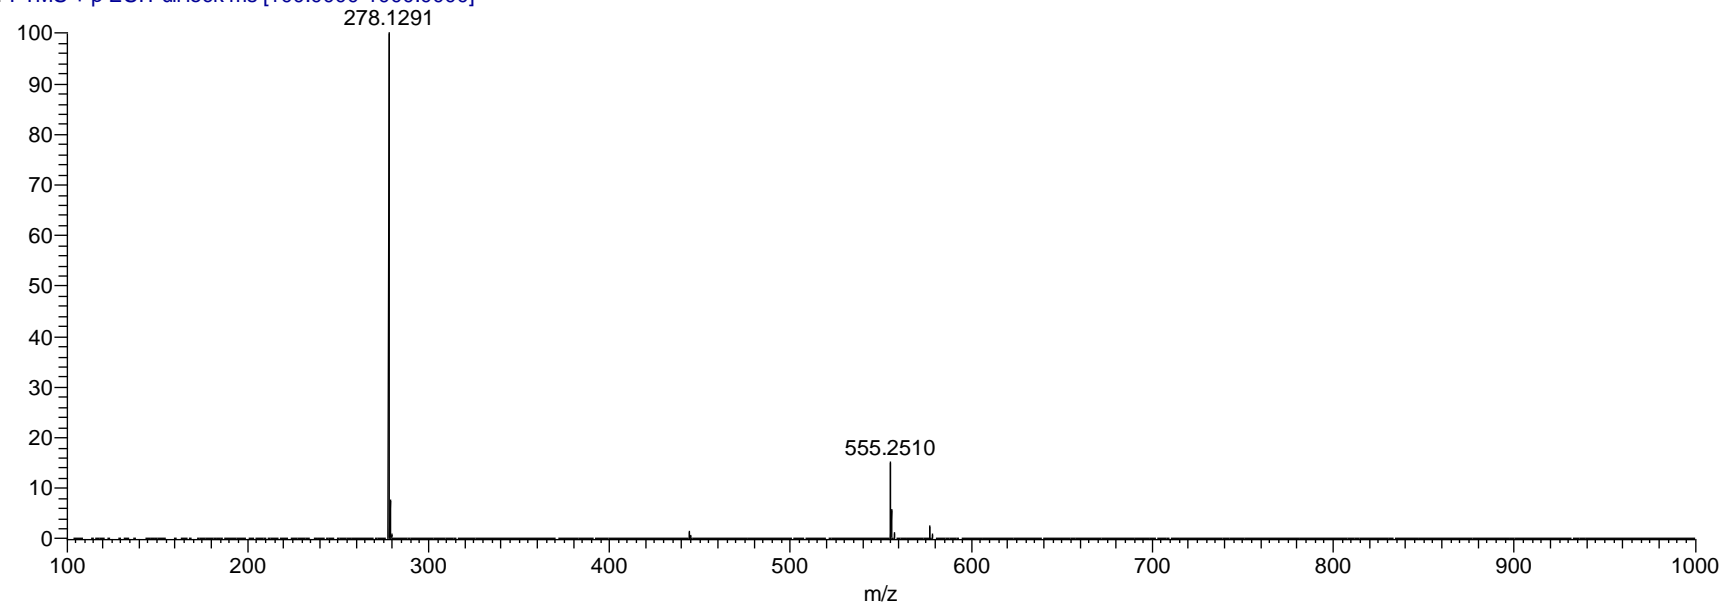

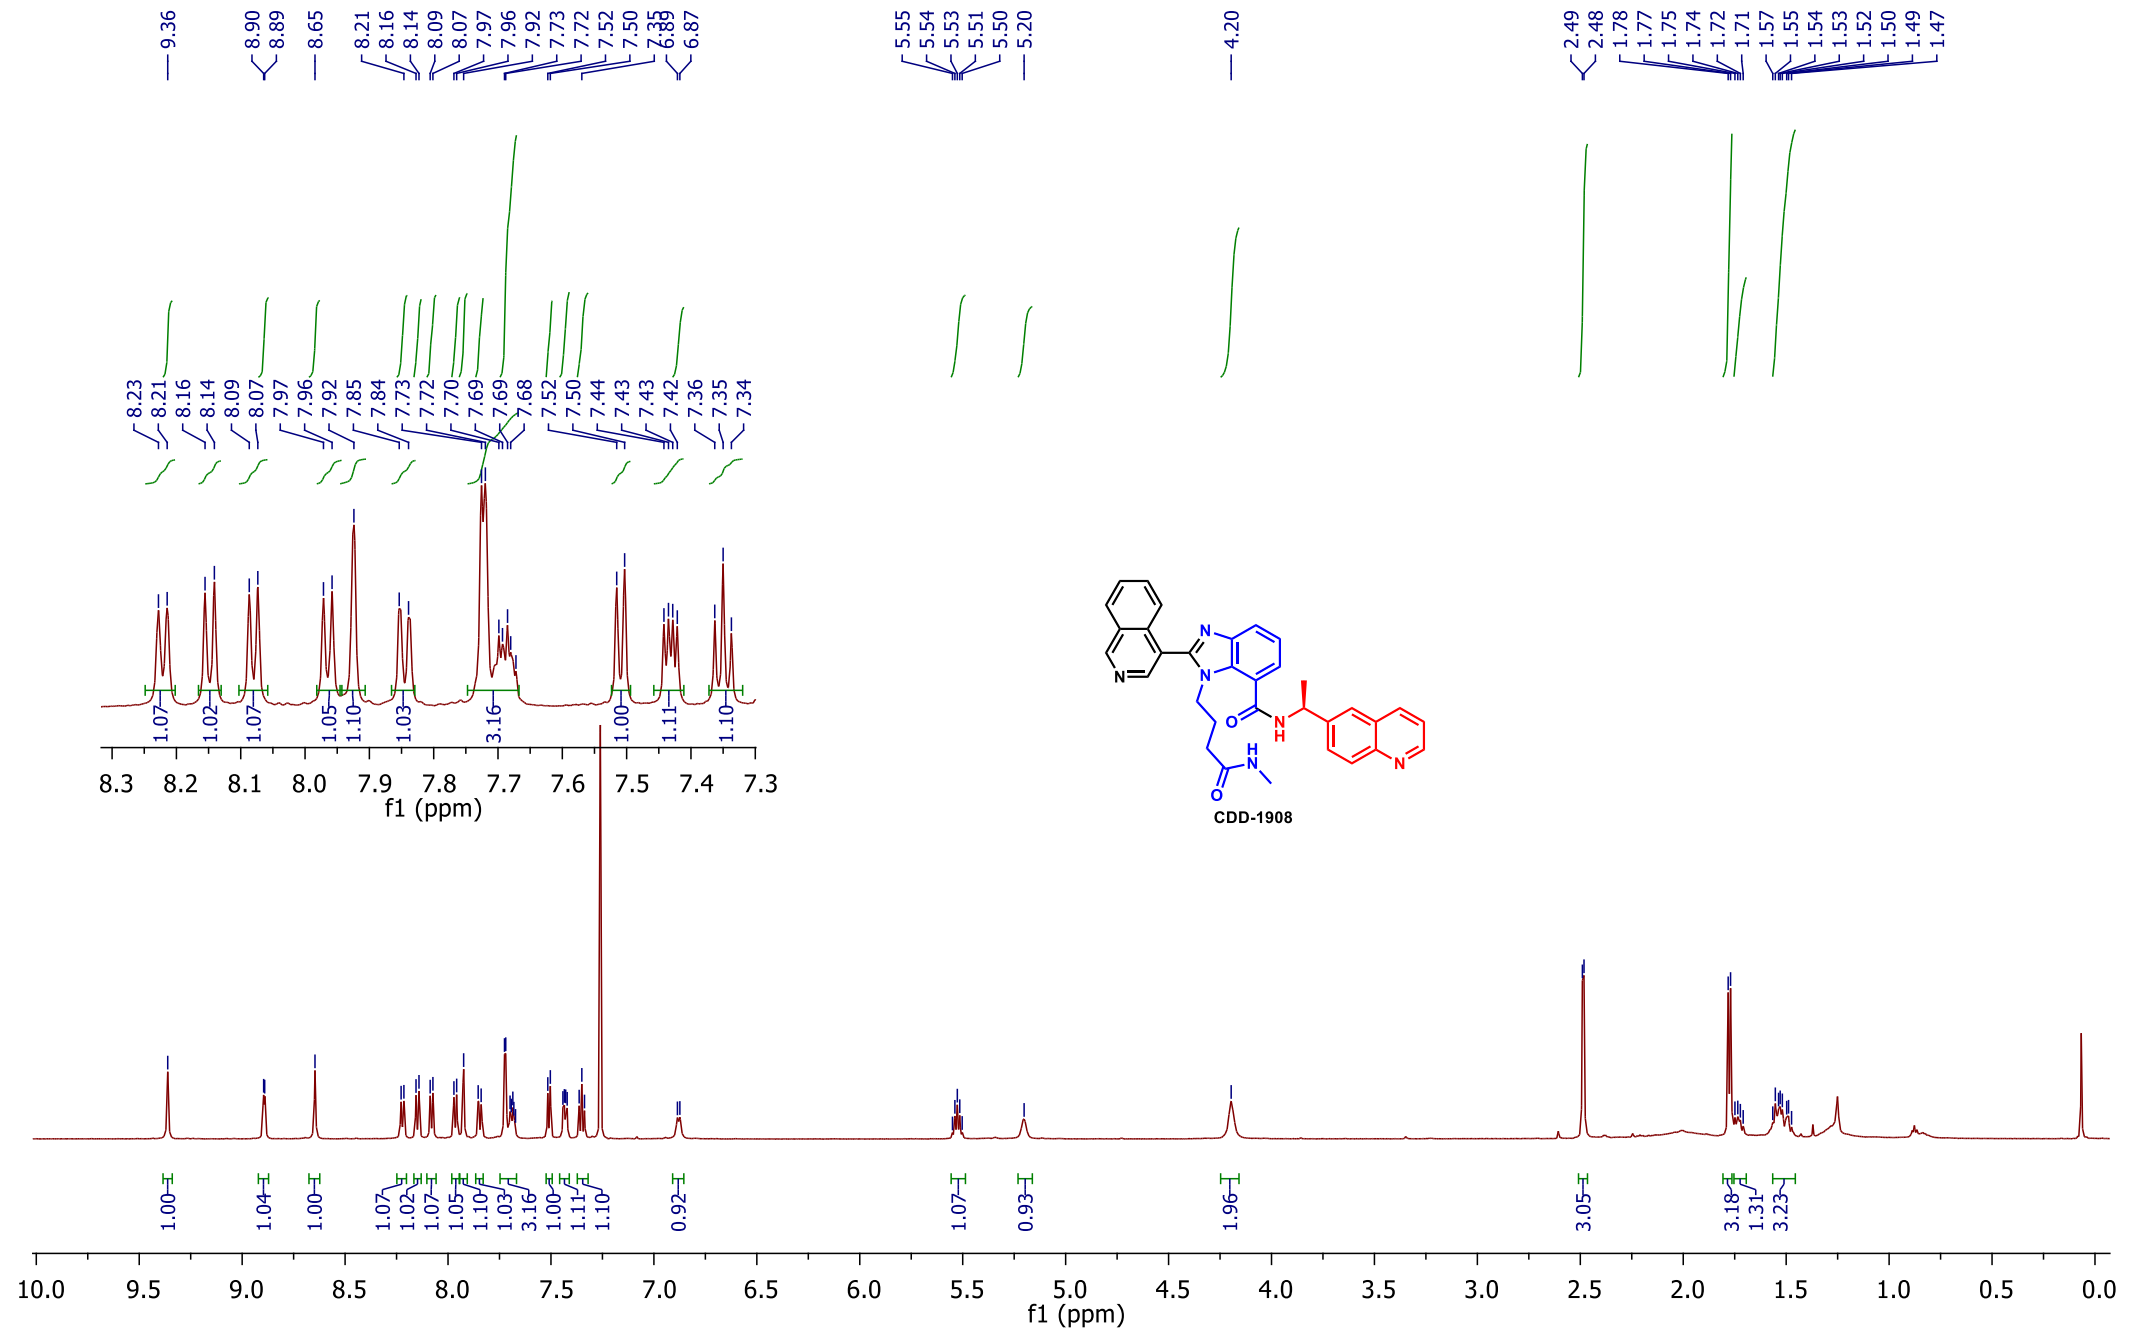

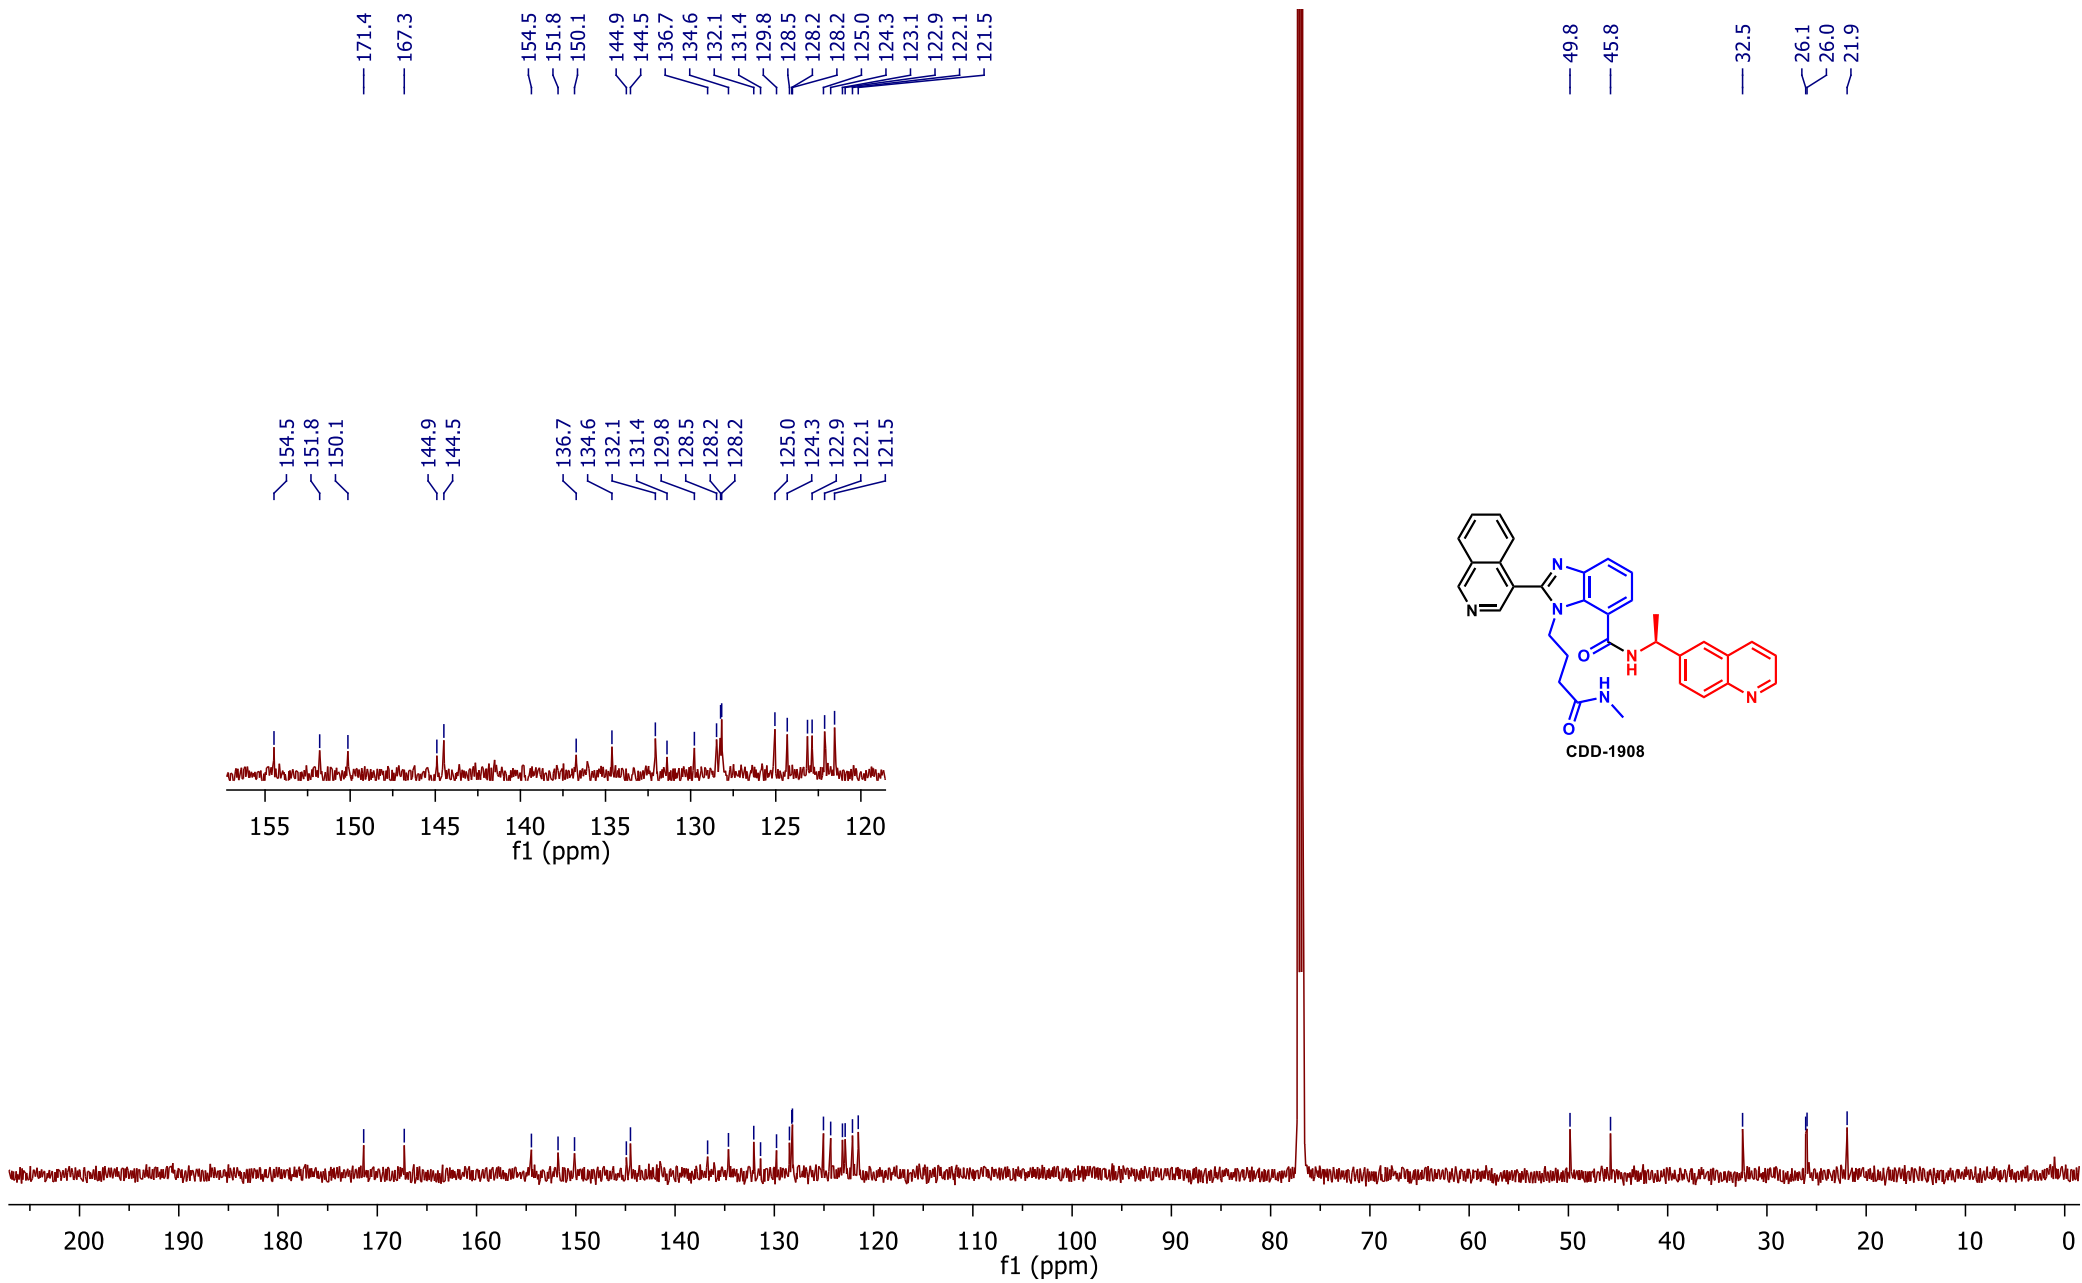



RT: 0.00 - 7.01

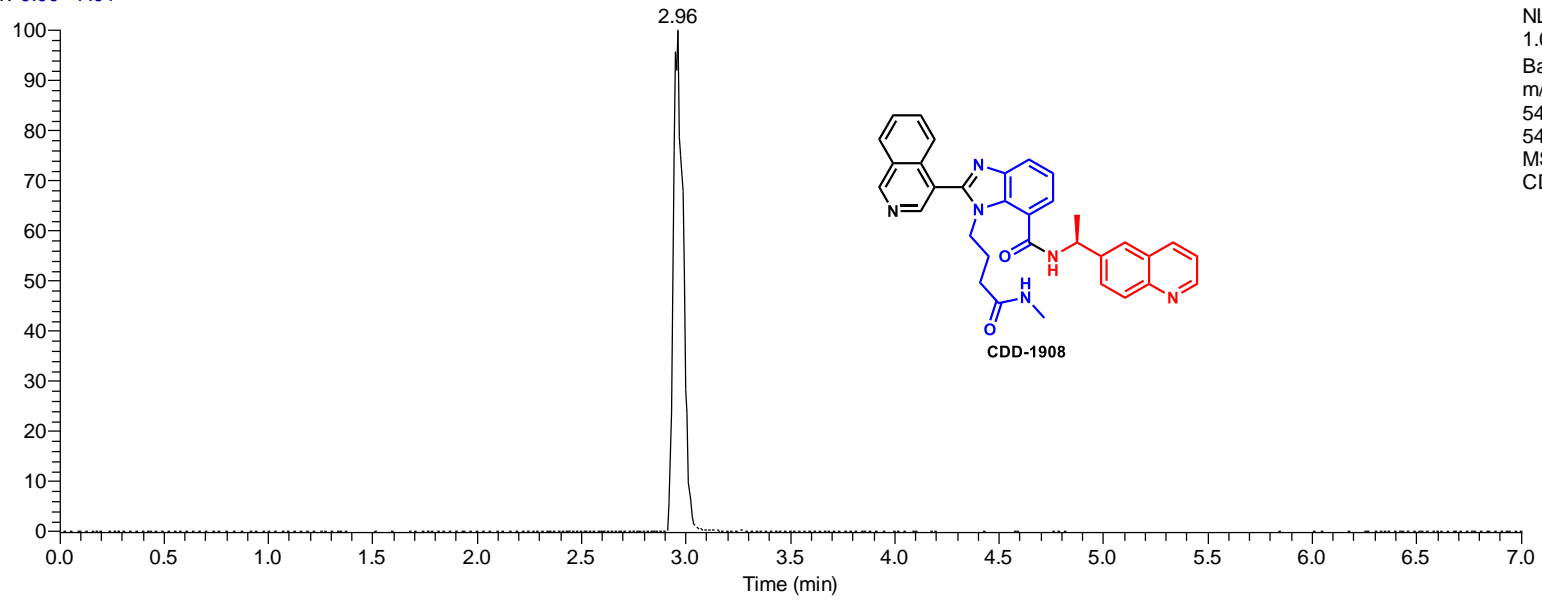

NL:  
1.07E8  
Base Peak  
m/z=  
542.7503-  
543.7503  
MS  
CDD1908

CDD1908 #372 RT: 2.96 AV: 1 NL: 5.64E8  
T: FTMS + p ESI Full lock ms [100.0000-1000.0000]

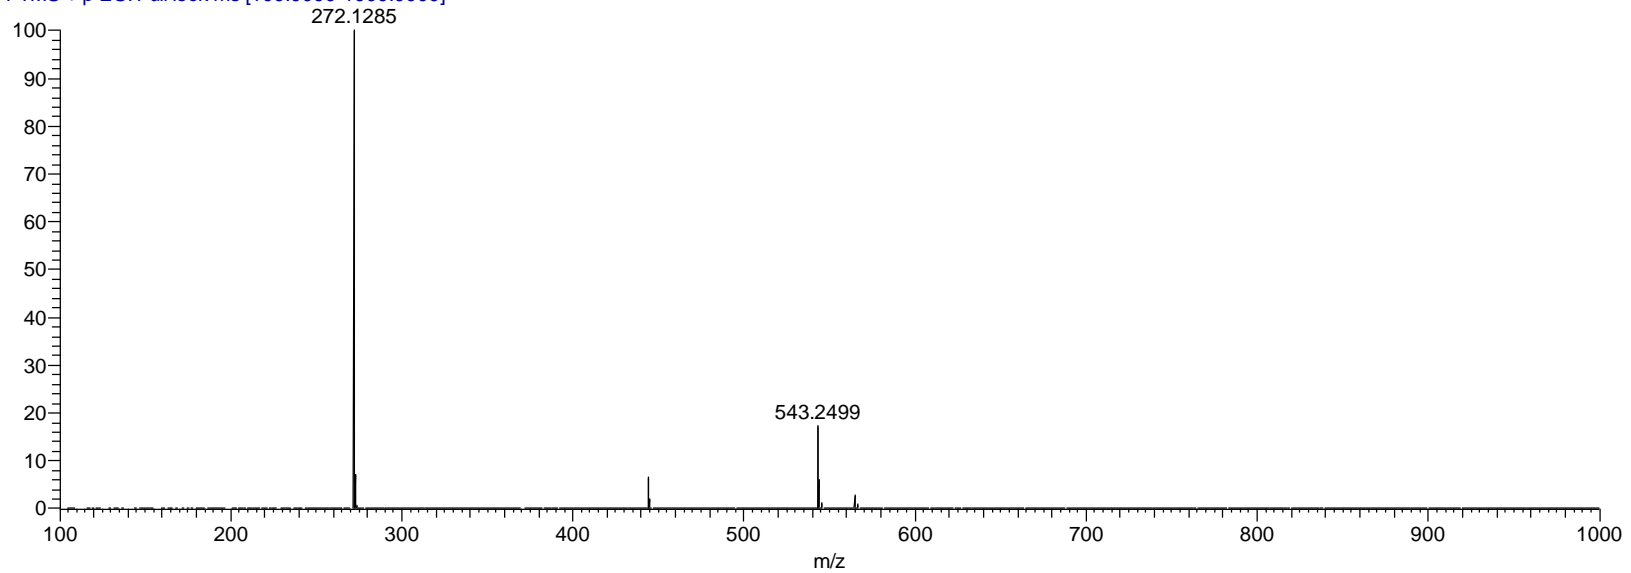

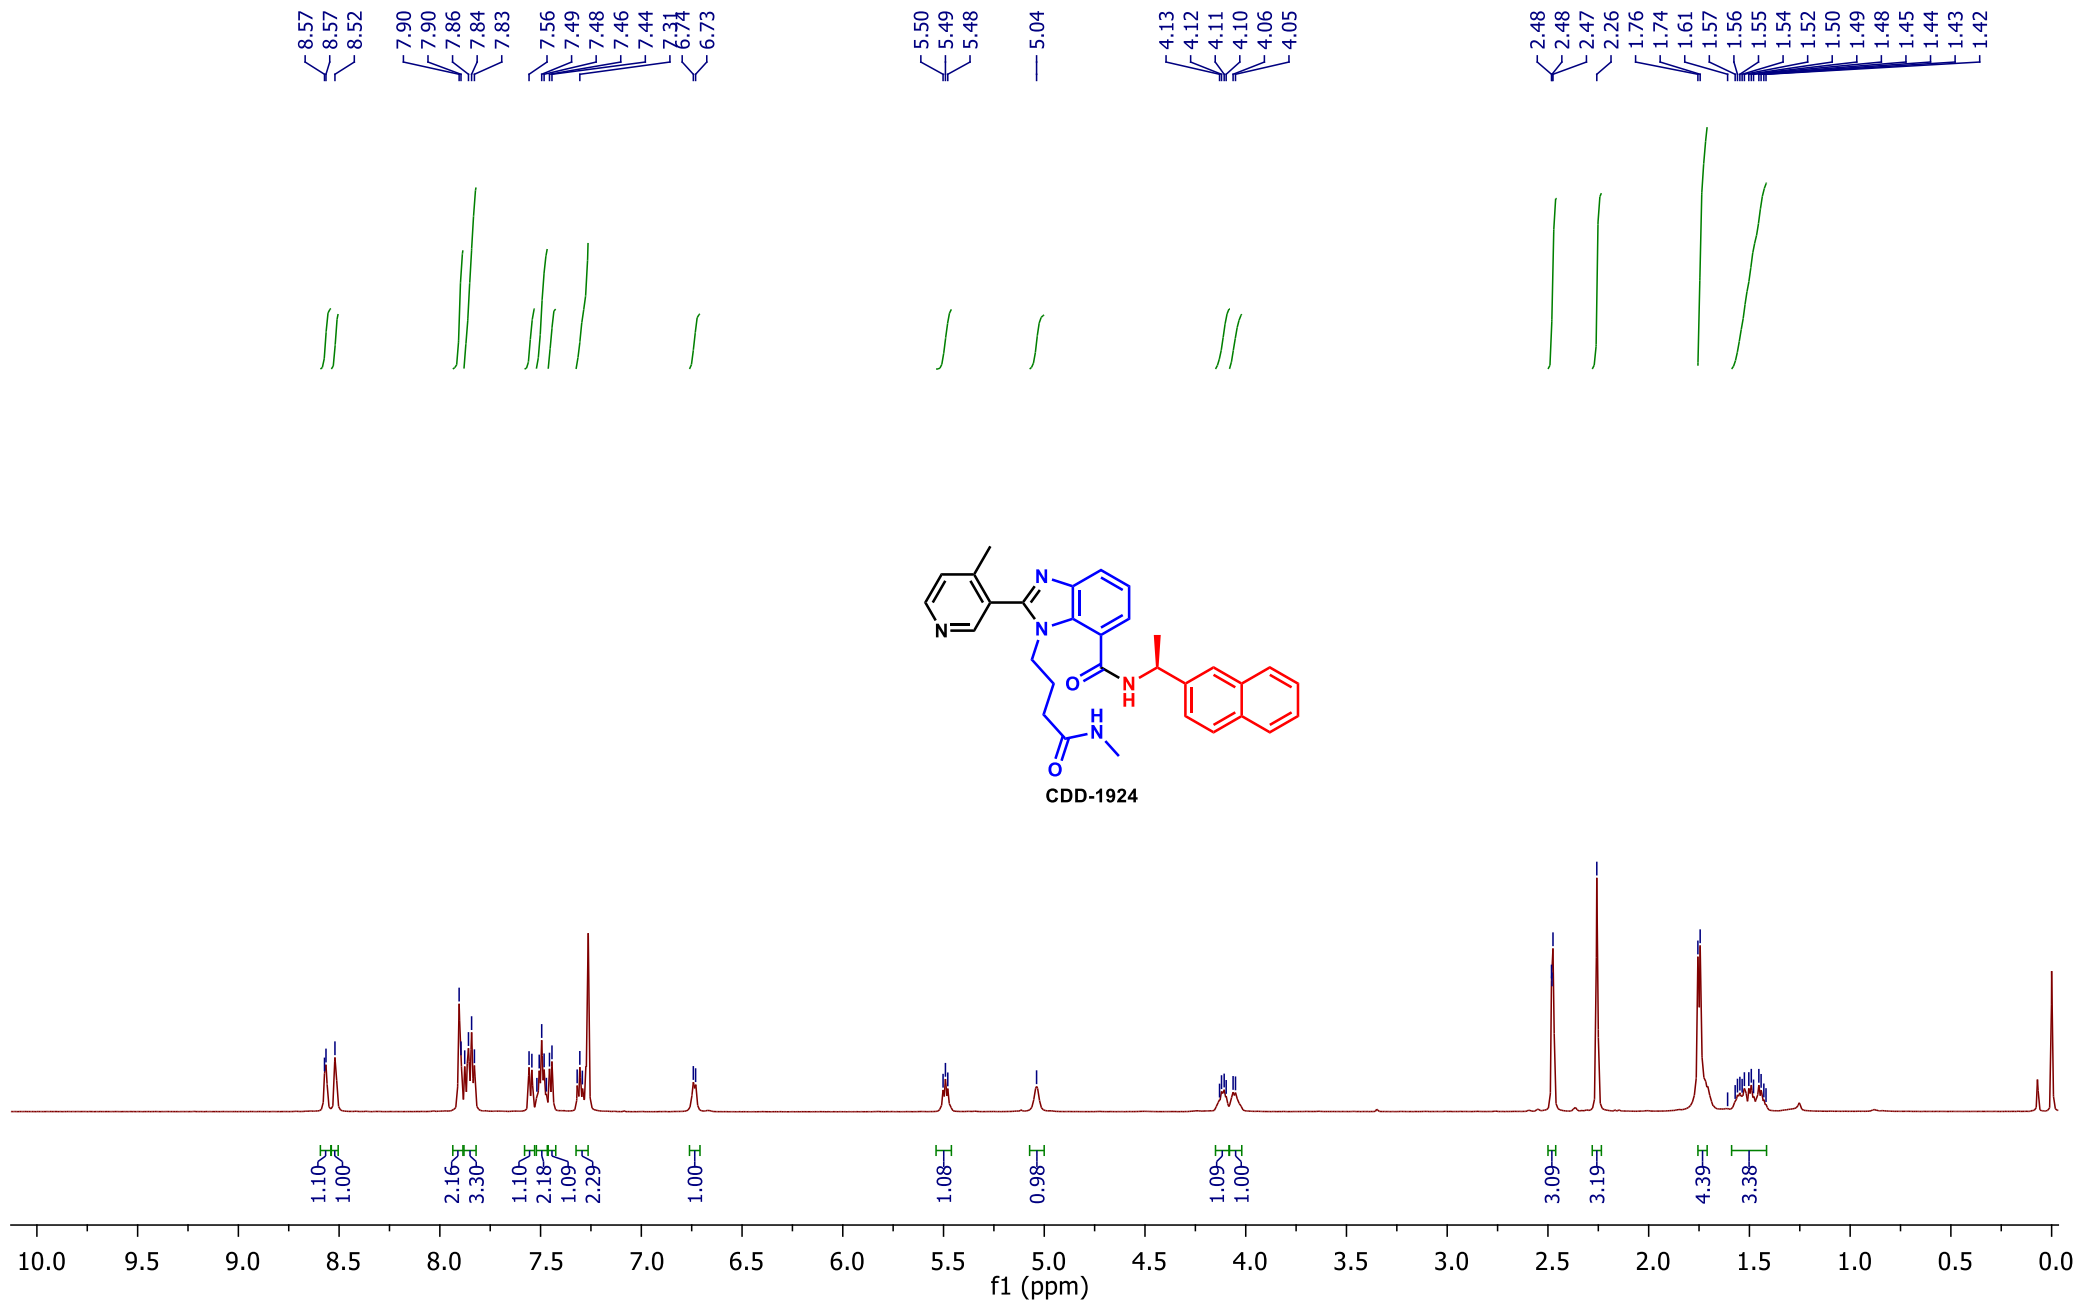

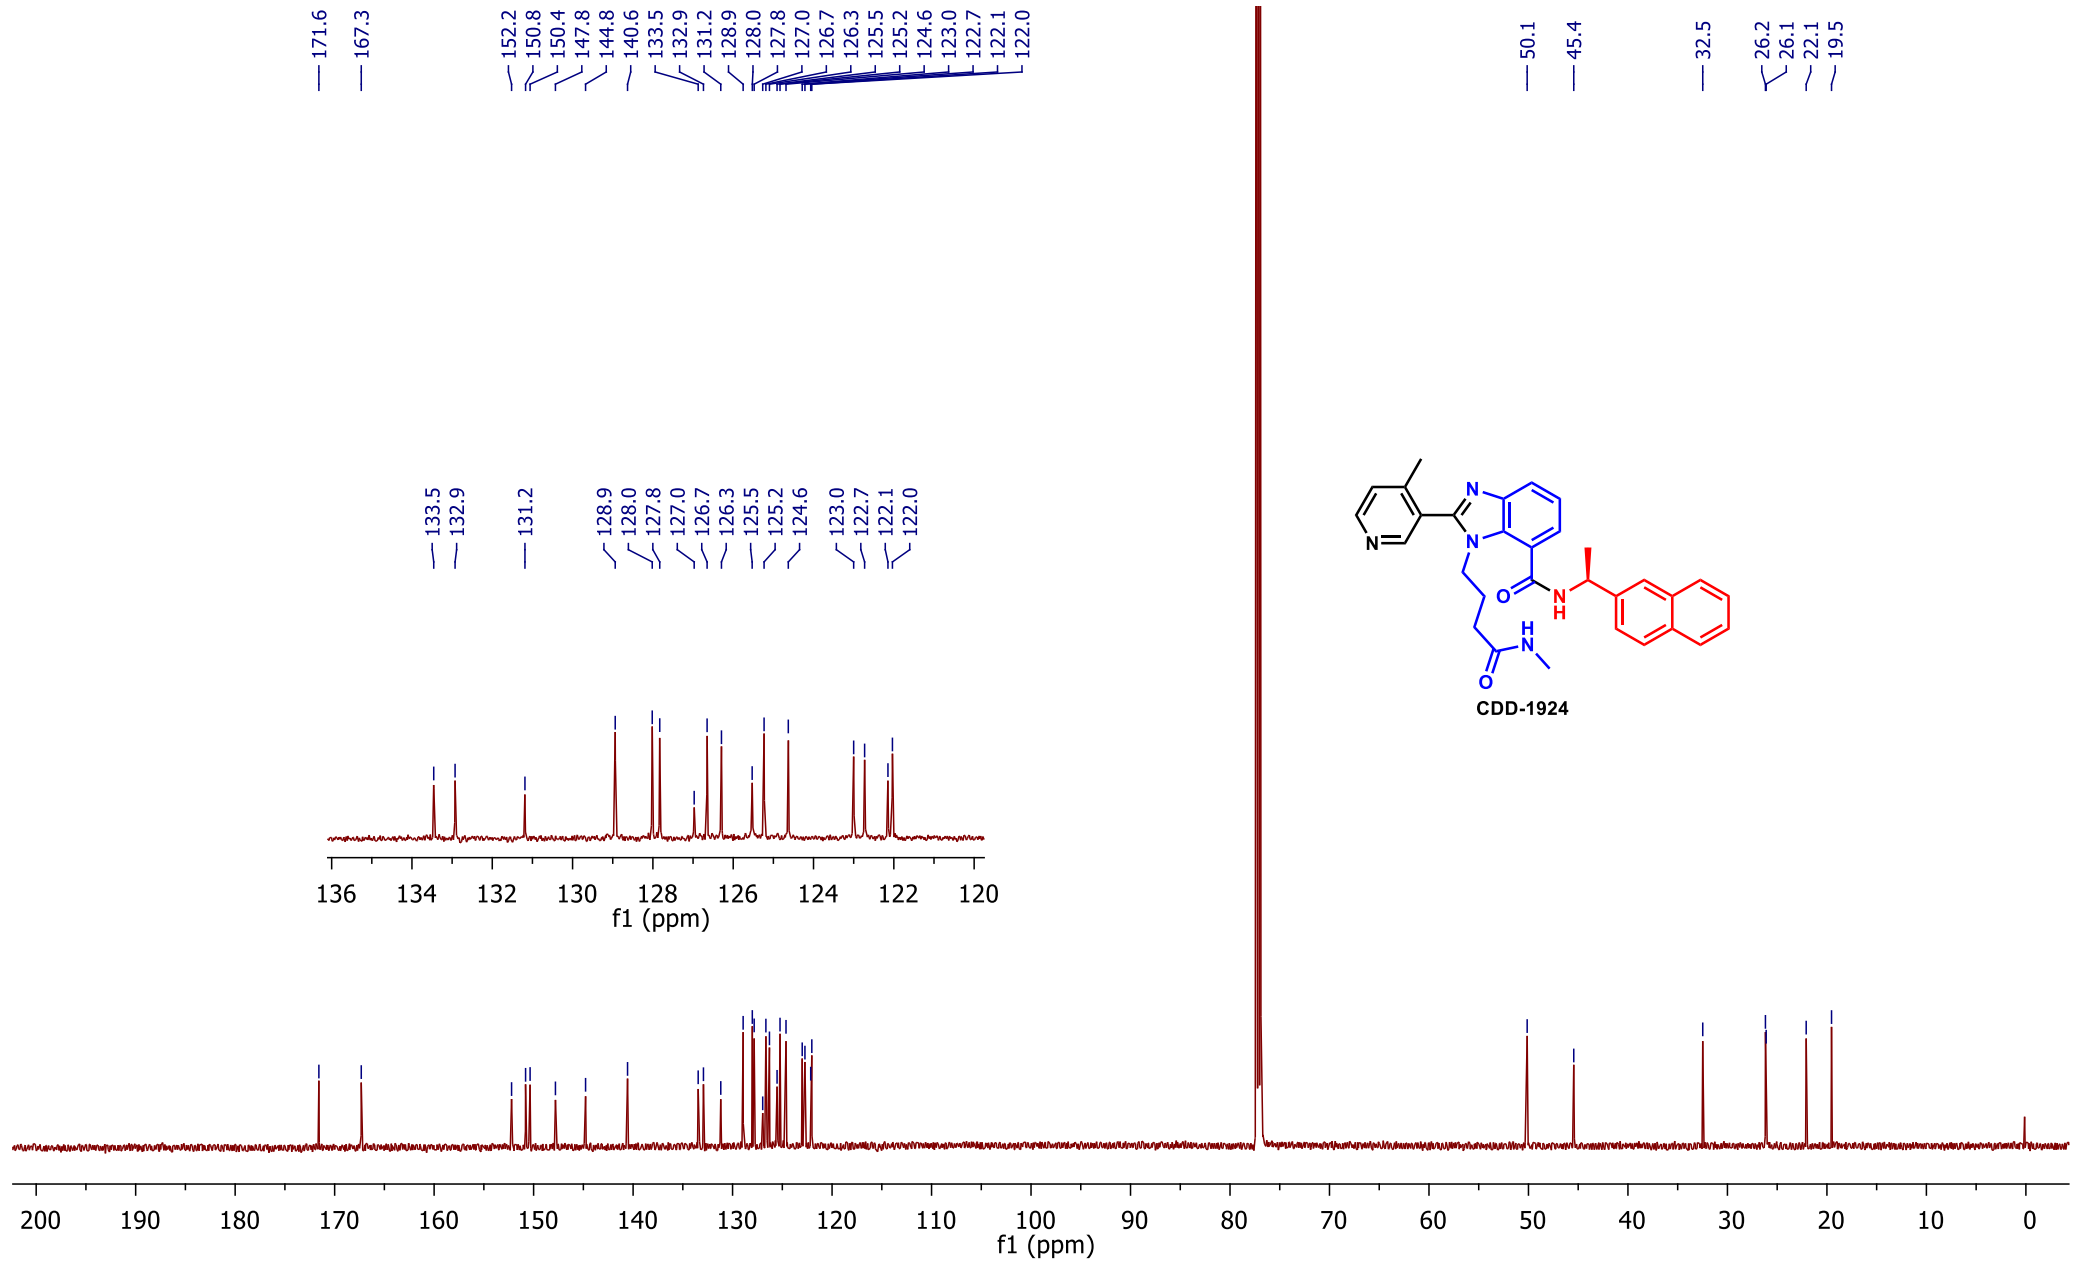

RT: 0.00 - 7.01

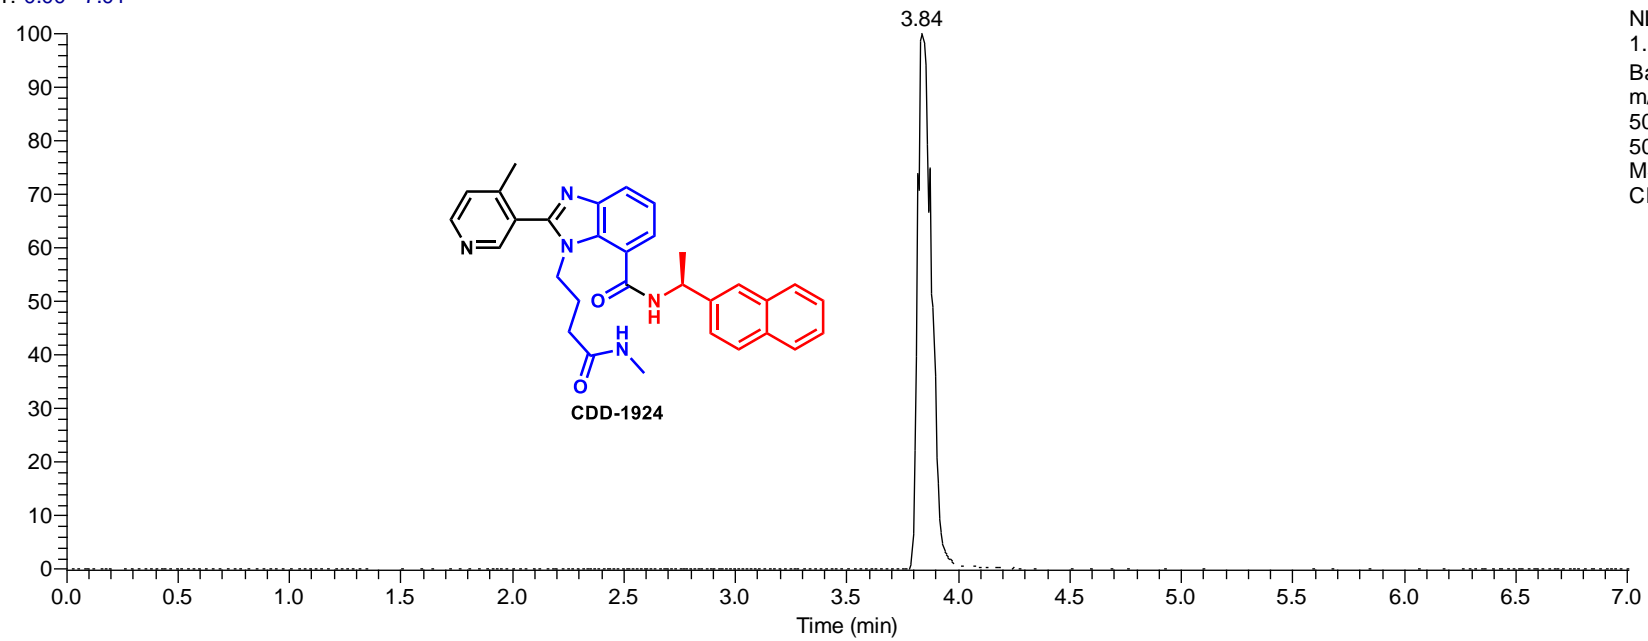

NL:  
1.15E9  
Base Peak  
m/z=  
505.7551-  
506.7551  
MS  
CDD1924

CDD1924 #480 RT: 3.84 AV: 1 NL: 1.12E9  
T: FTMS + p ESI Full lock ms [100.0000-1000.0000]

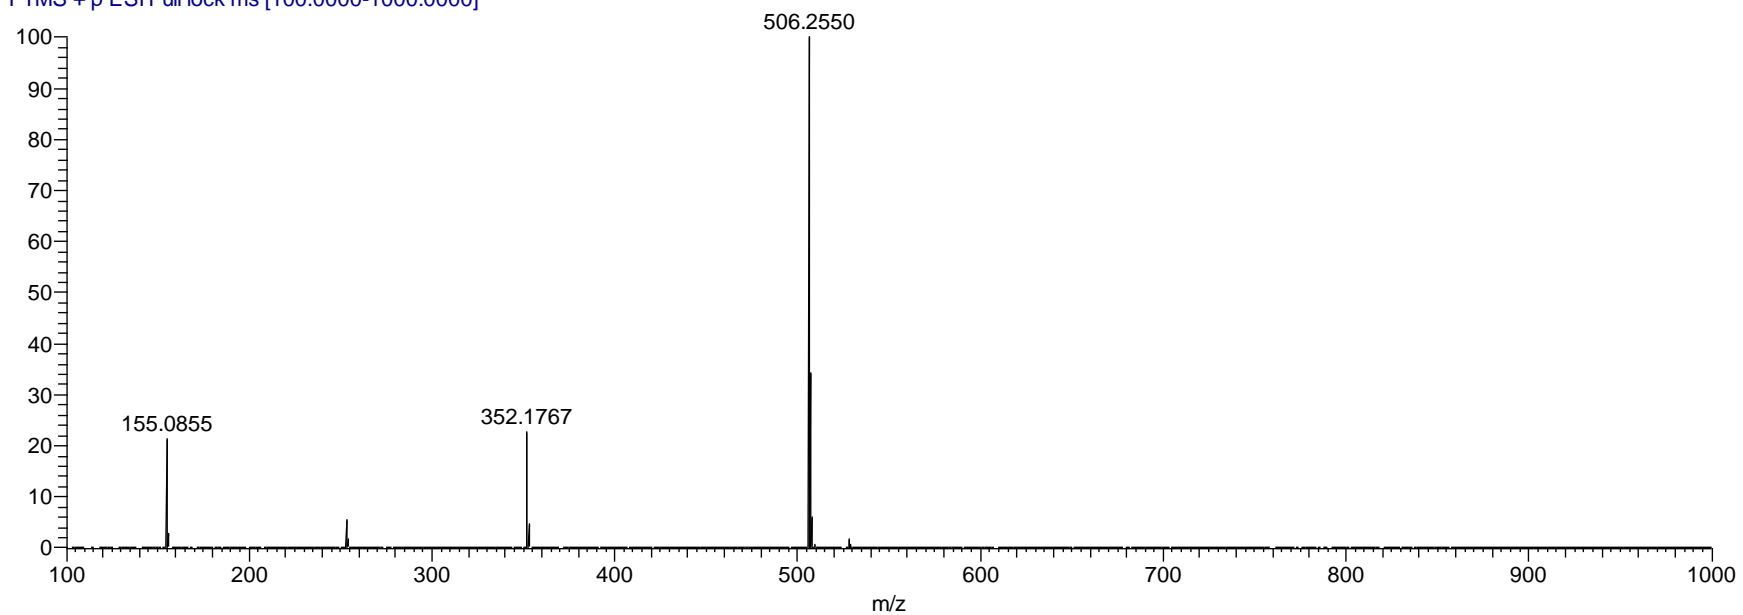

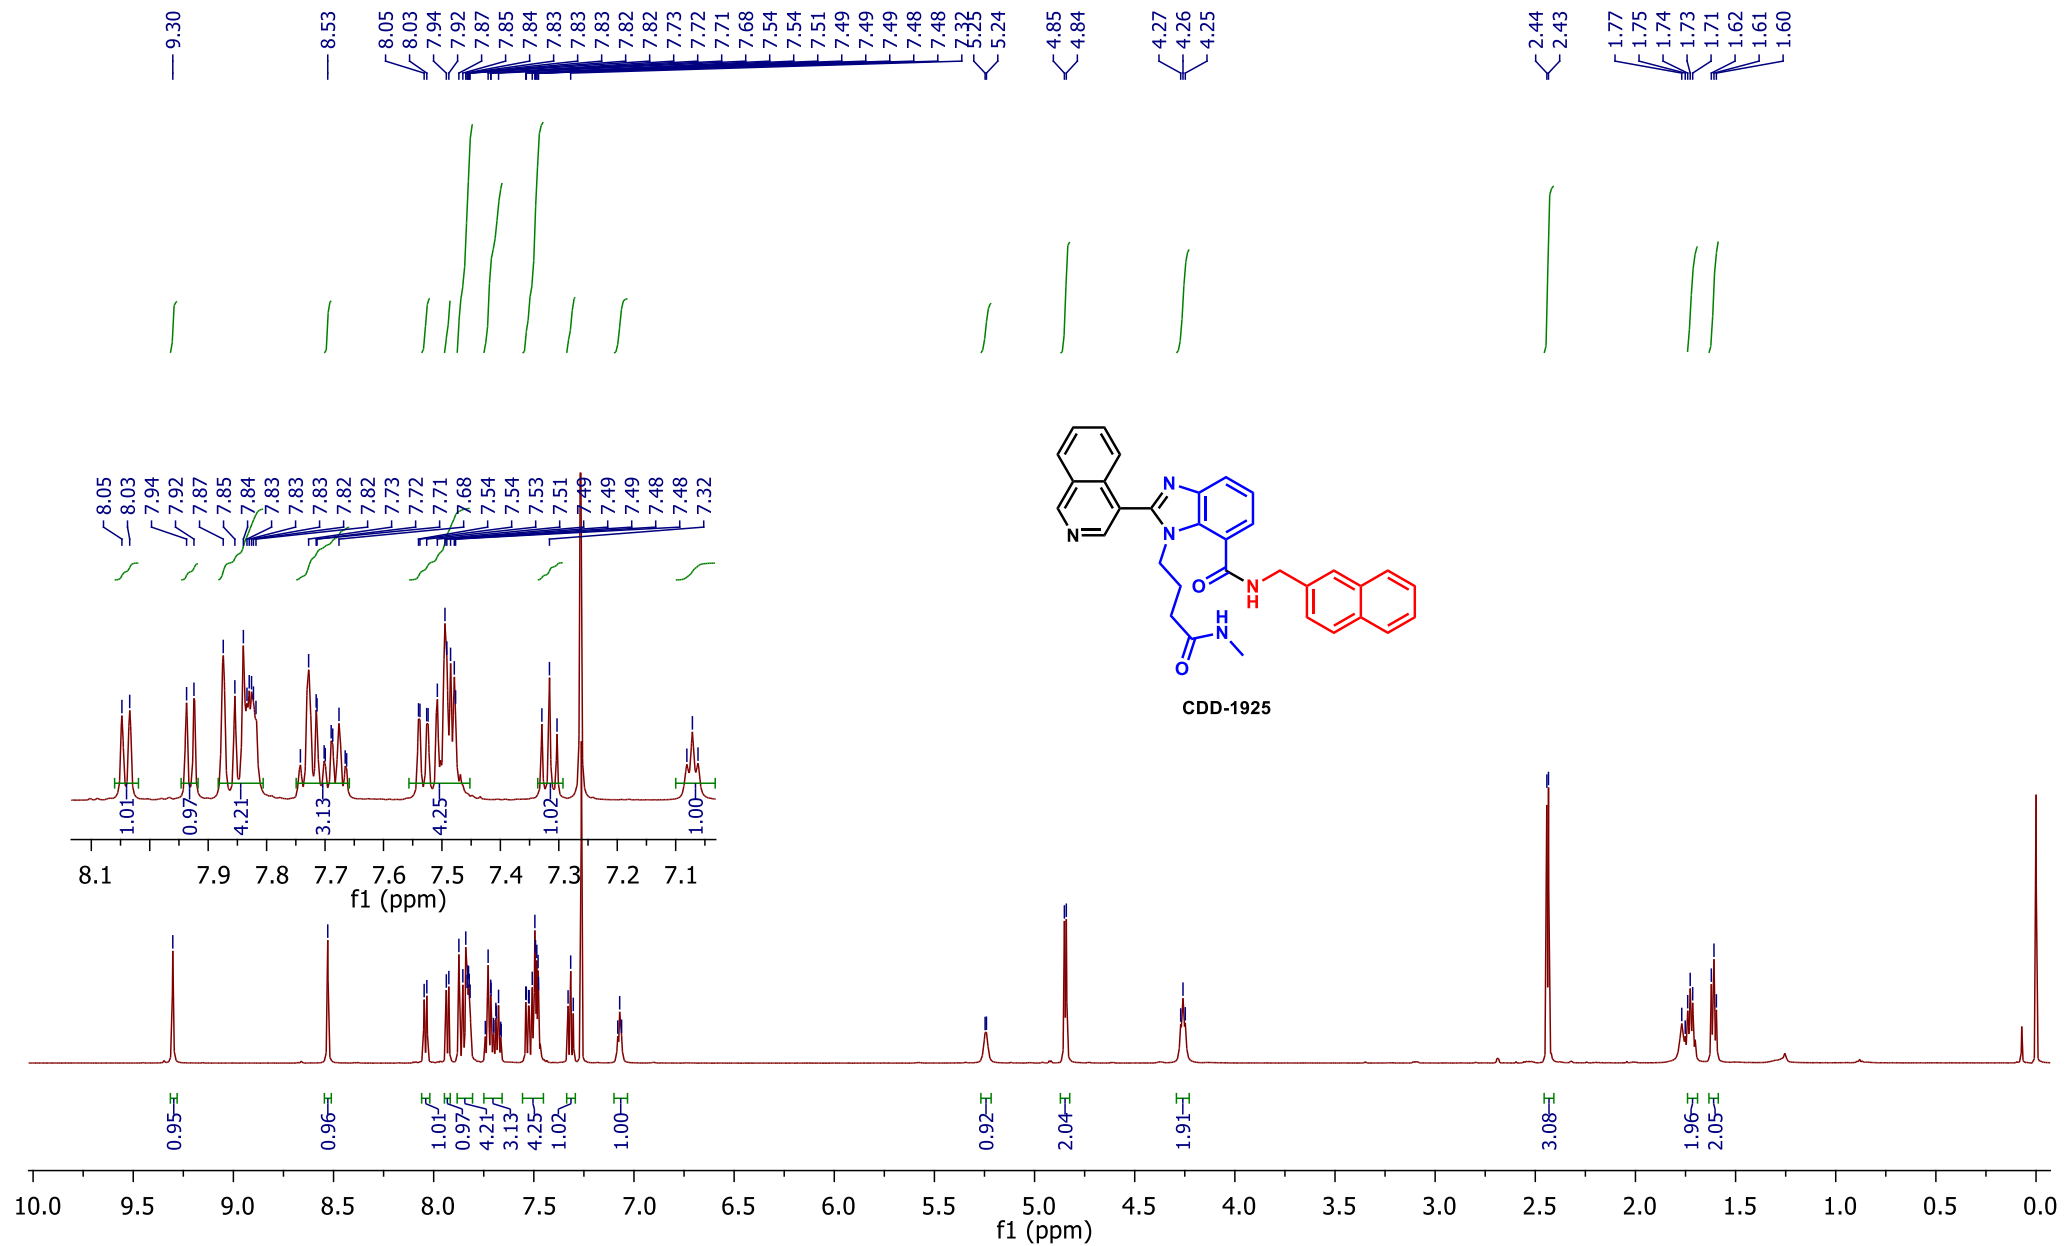



RT: 0.00 - 7.01

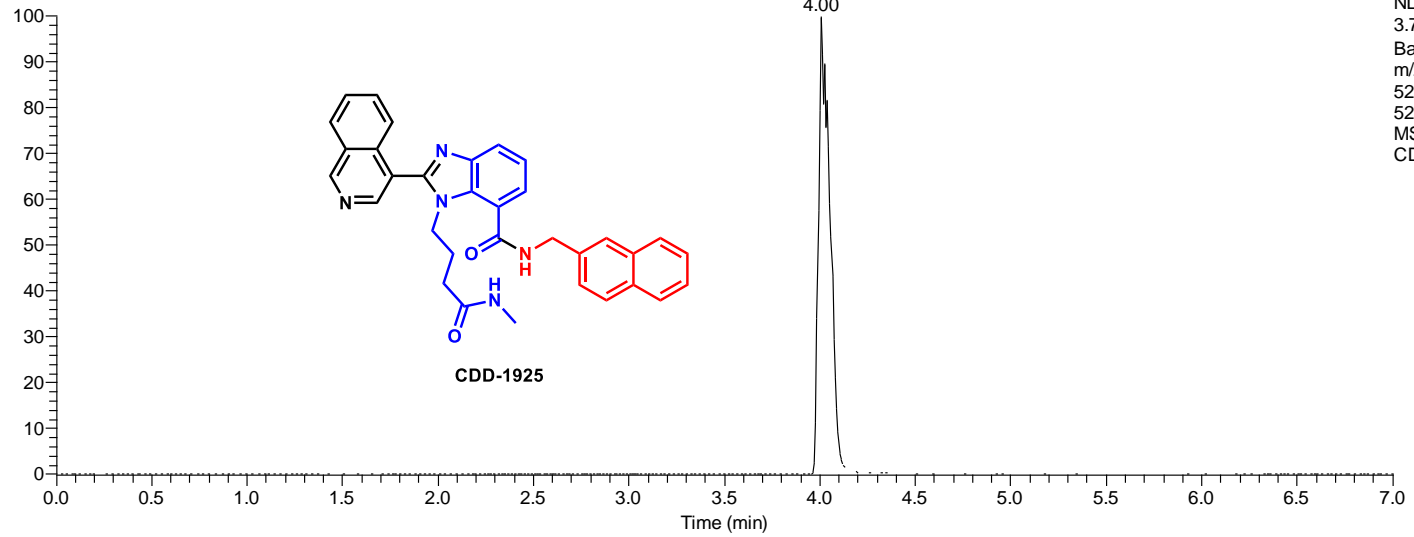

NL:  
3.74E8  
Base Peak  
m/z=  
527.7394-  
528.7394  
MS  
CDD1925

CDD1925 #492 RT: 4.00 AV: 1 NL: 2.93E8  
T: FTMS + p ESI Full ms [100.0000-1000.0000]

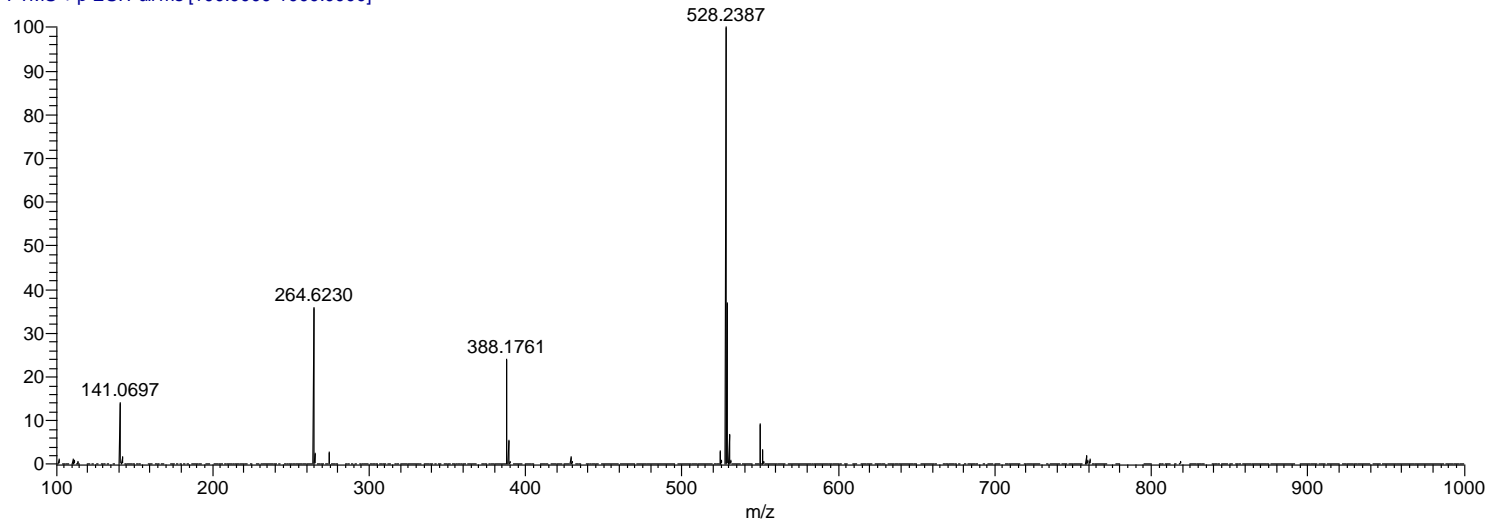

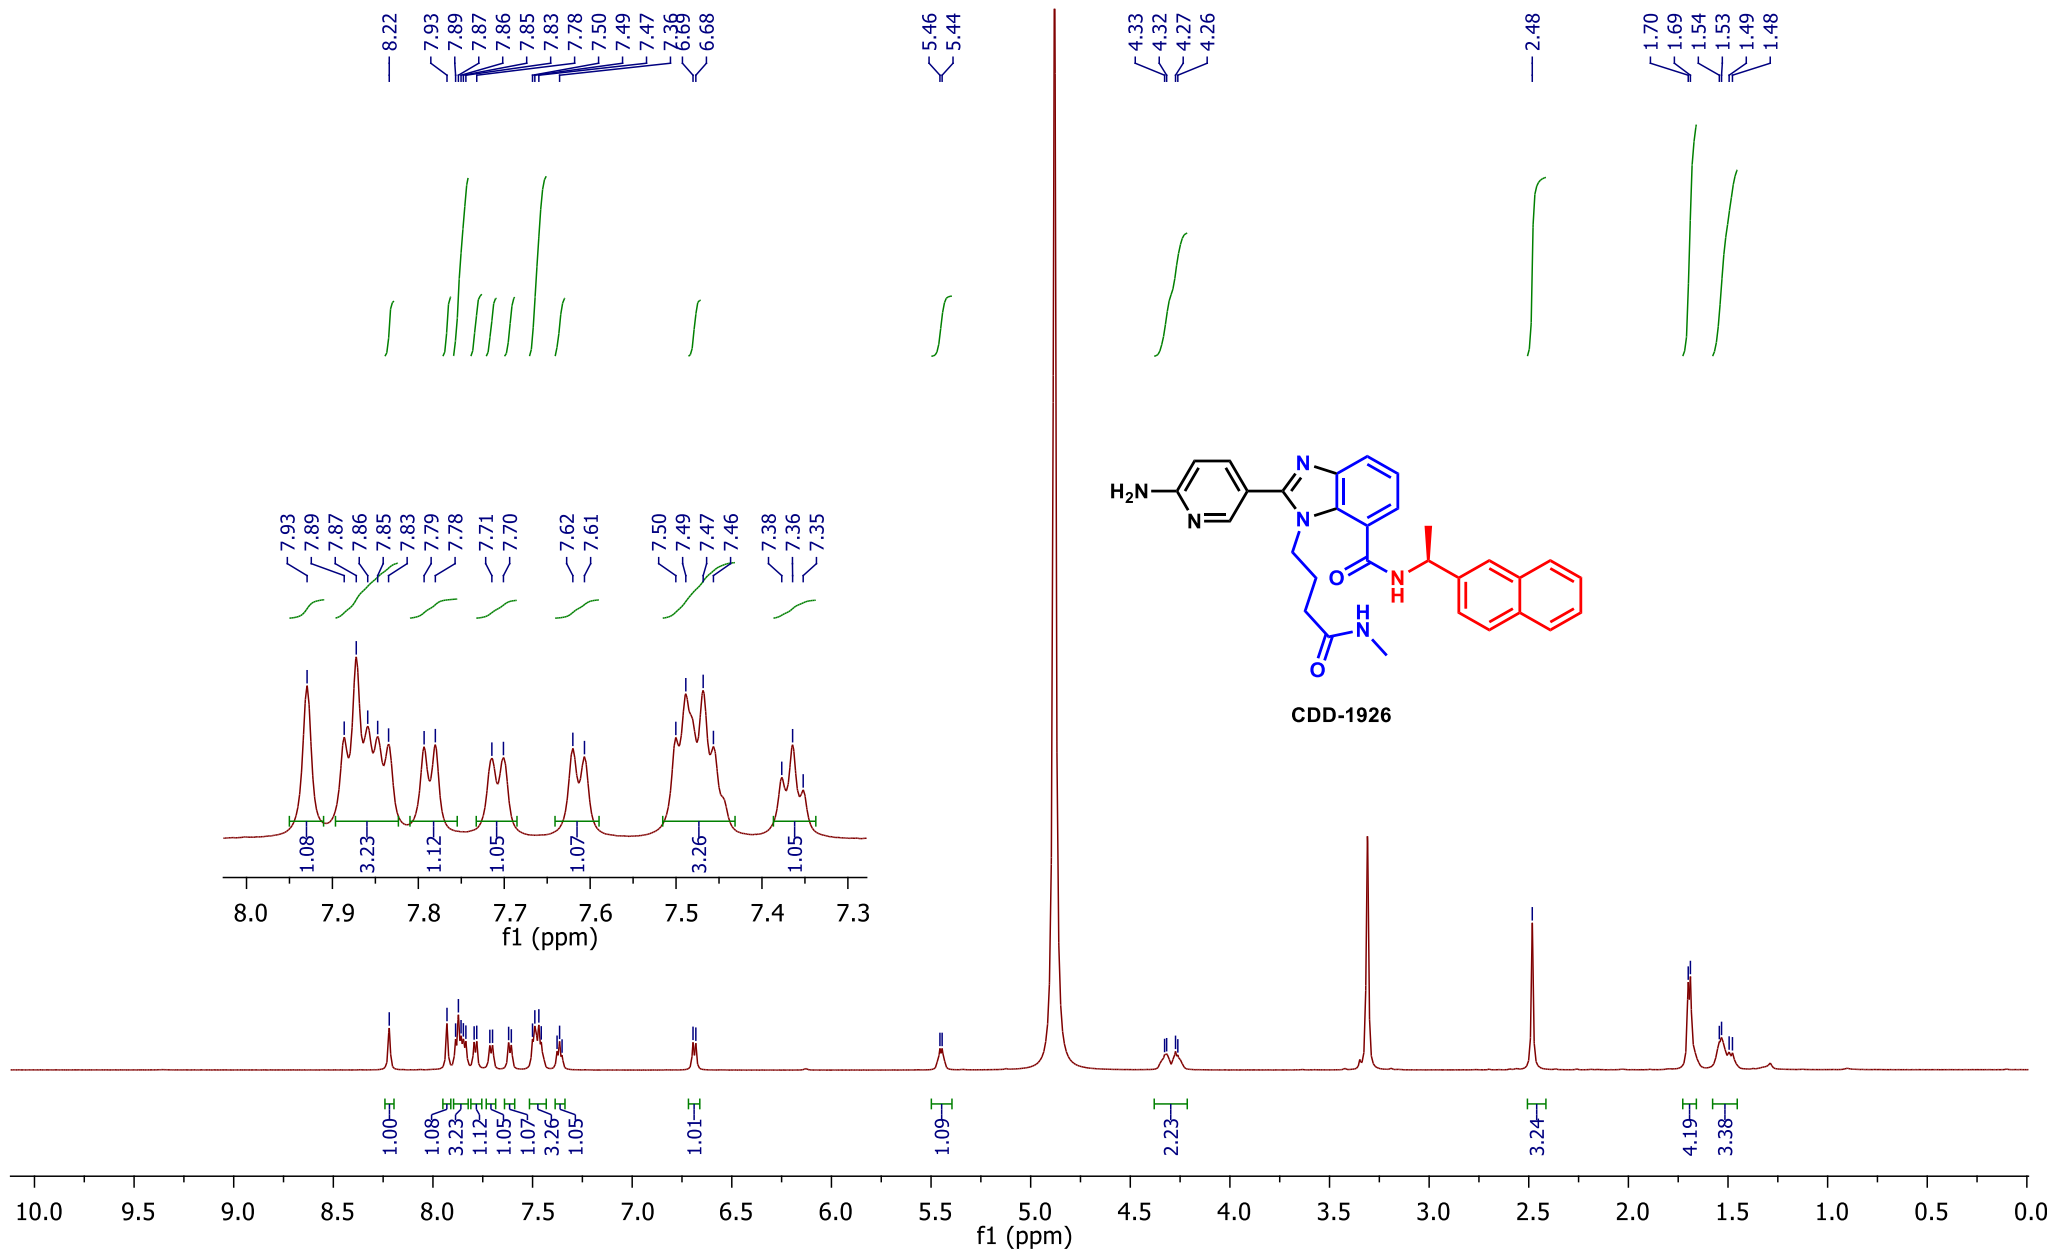



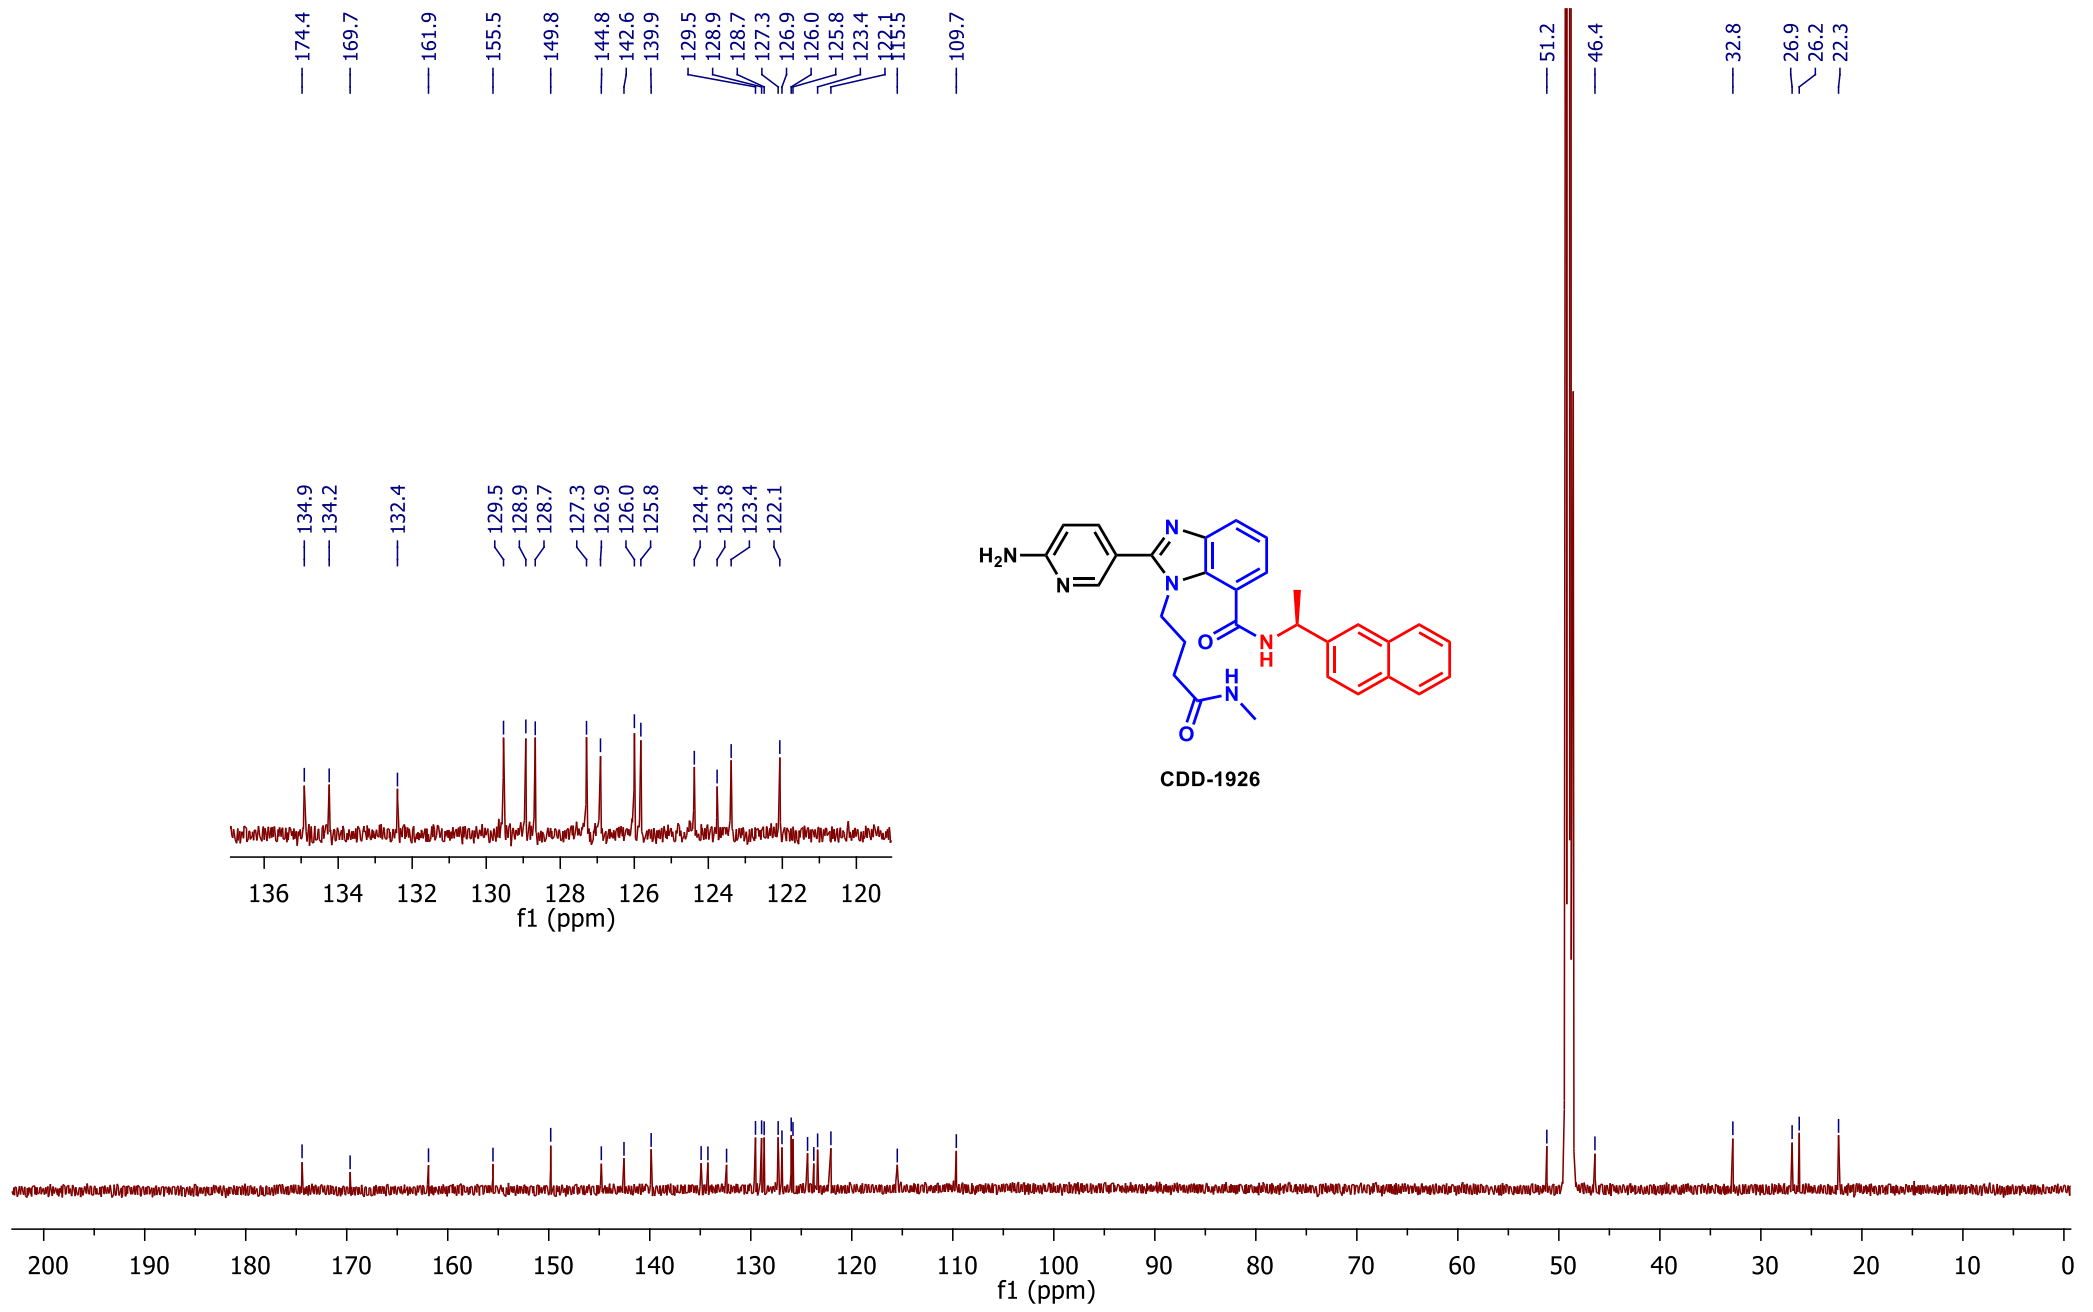

RT: 0.00 - 7.00

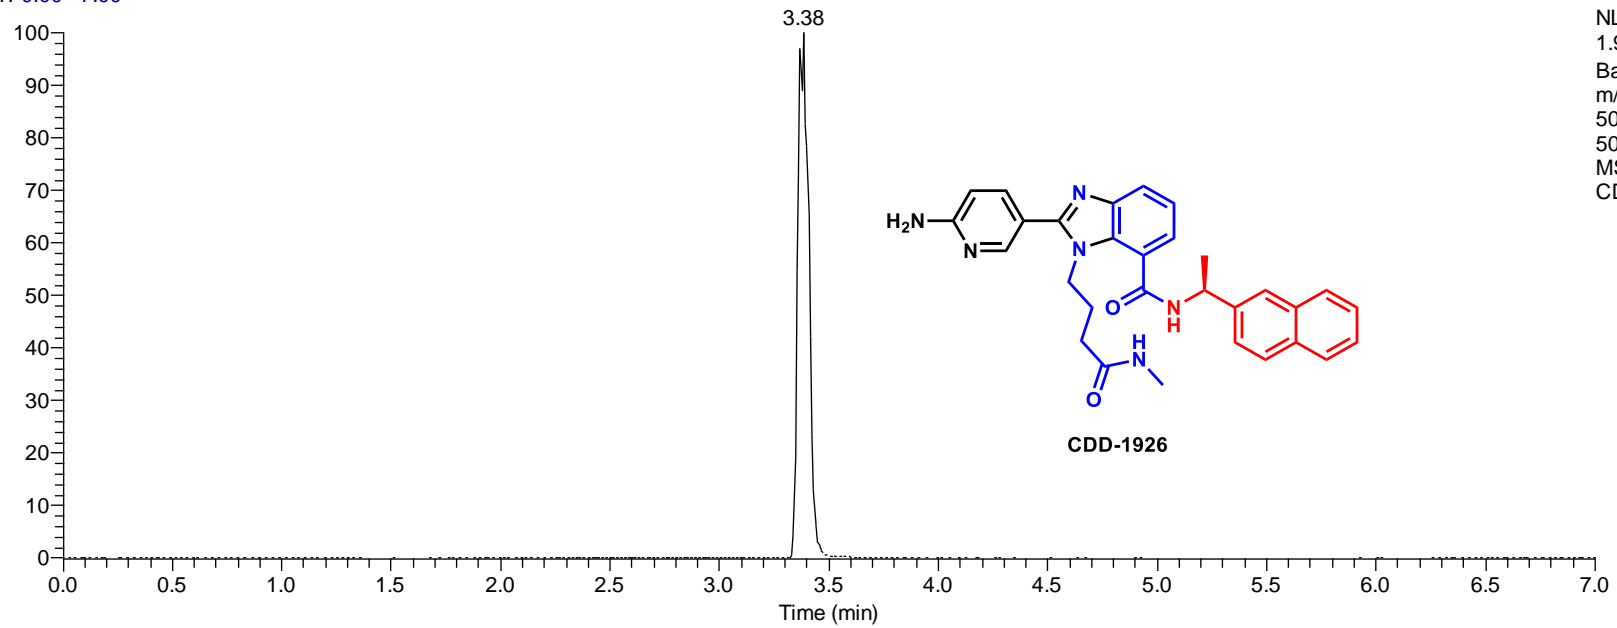

NL:  
1.98E7  
Base Peak  
m/z=  
506.7503-  
507.7503  
MS  
CDD1926

CDD1926 #417 RT: 3.38 AV: 1 NL: 1.81E7  
T: FTMS + p ESI Full lock ms [100.0000-1000.0000]

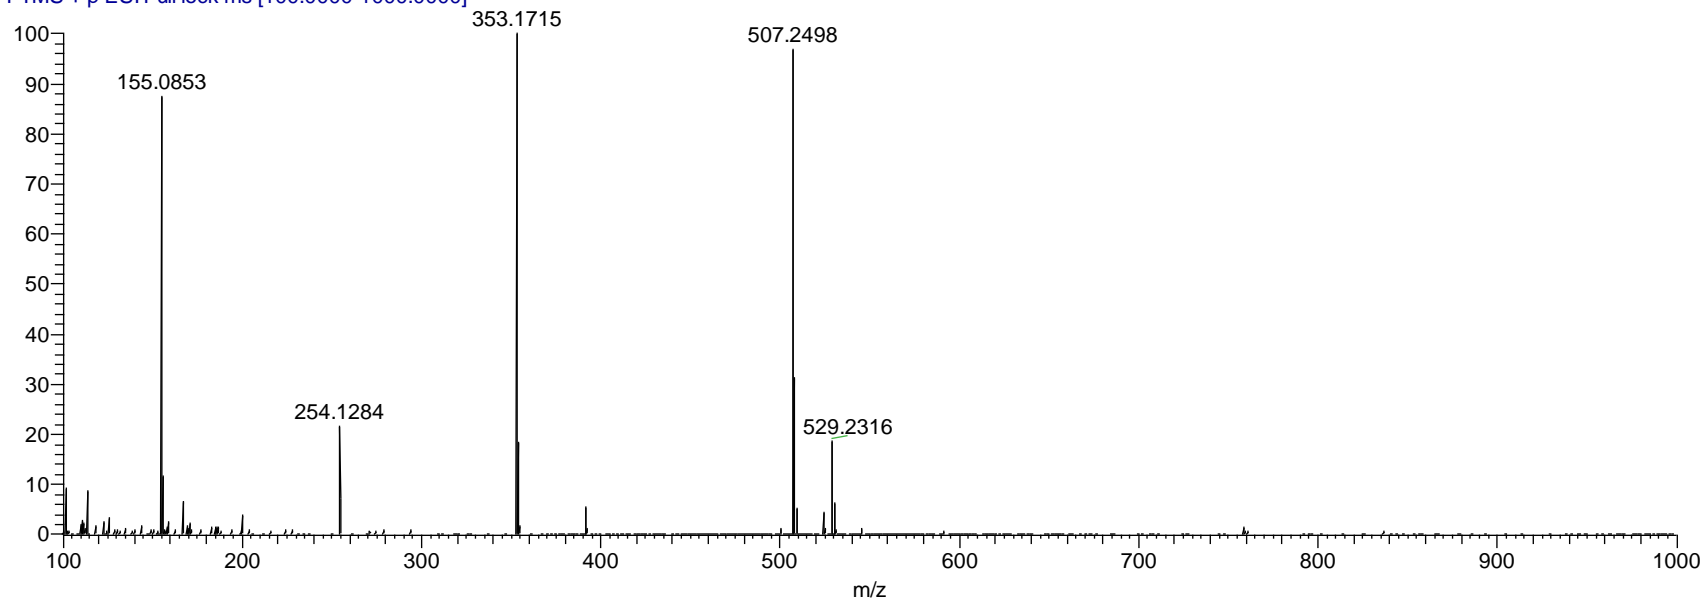

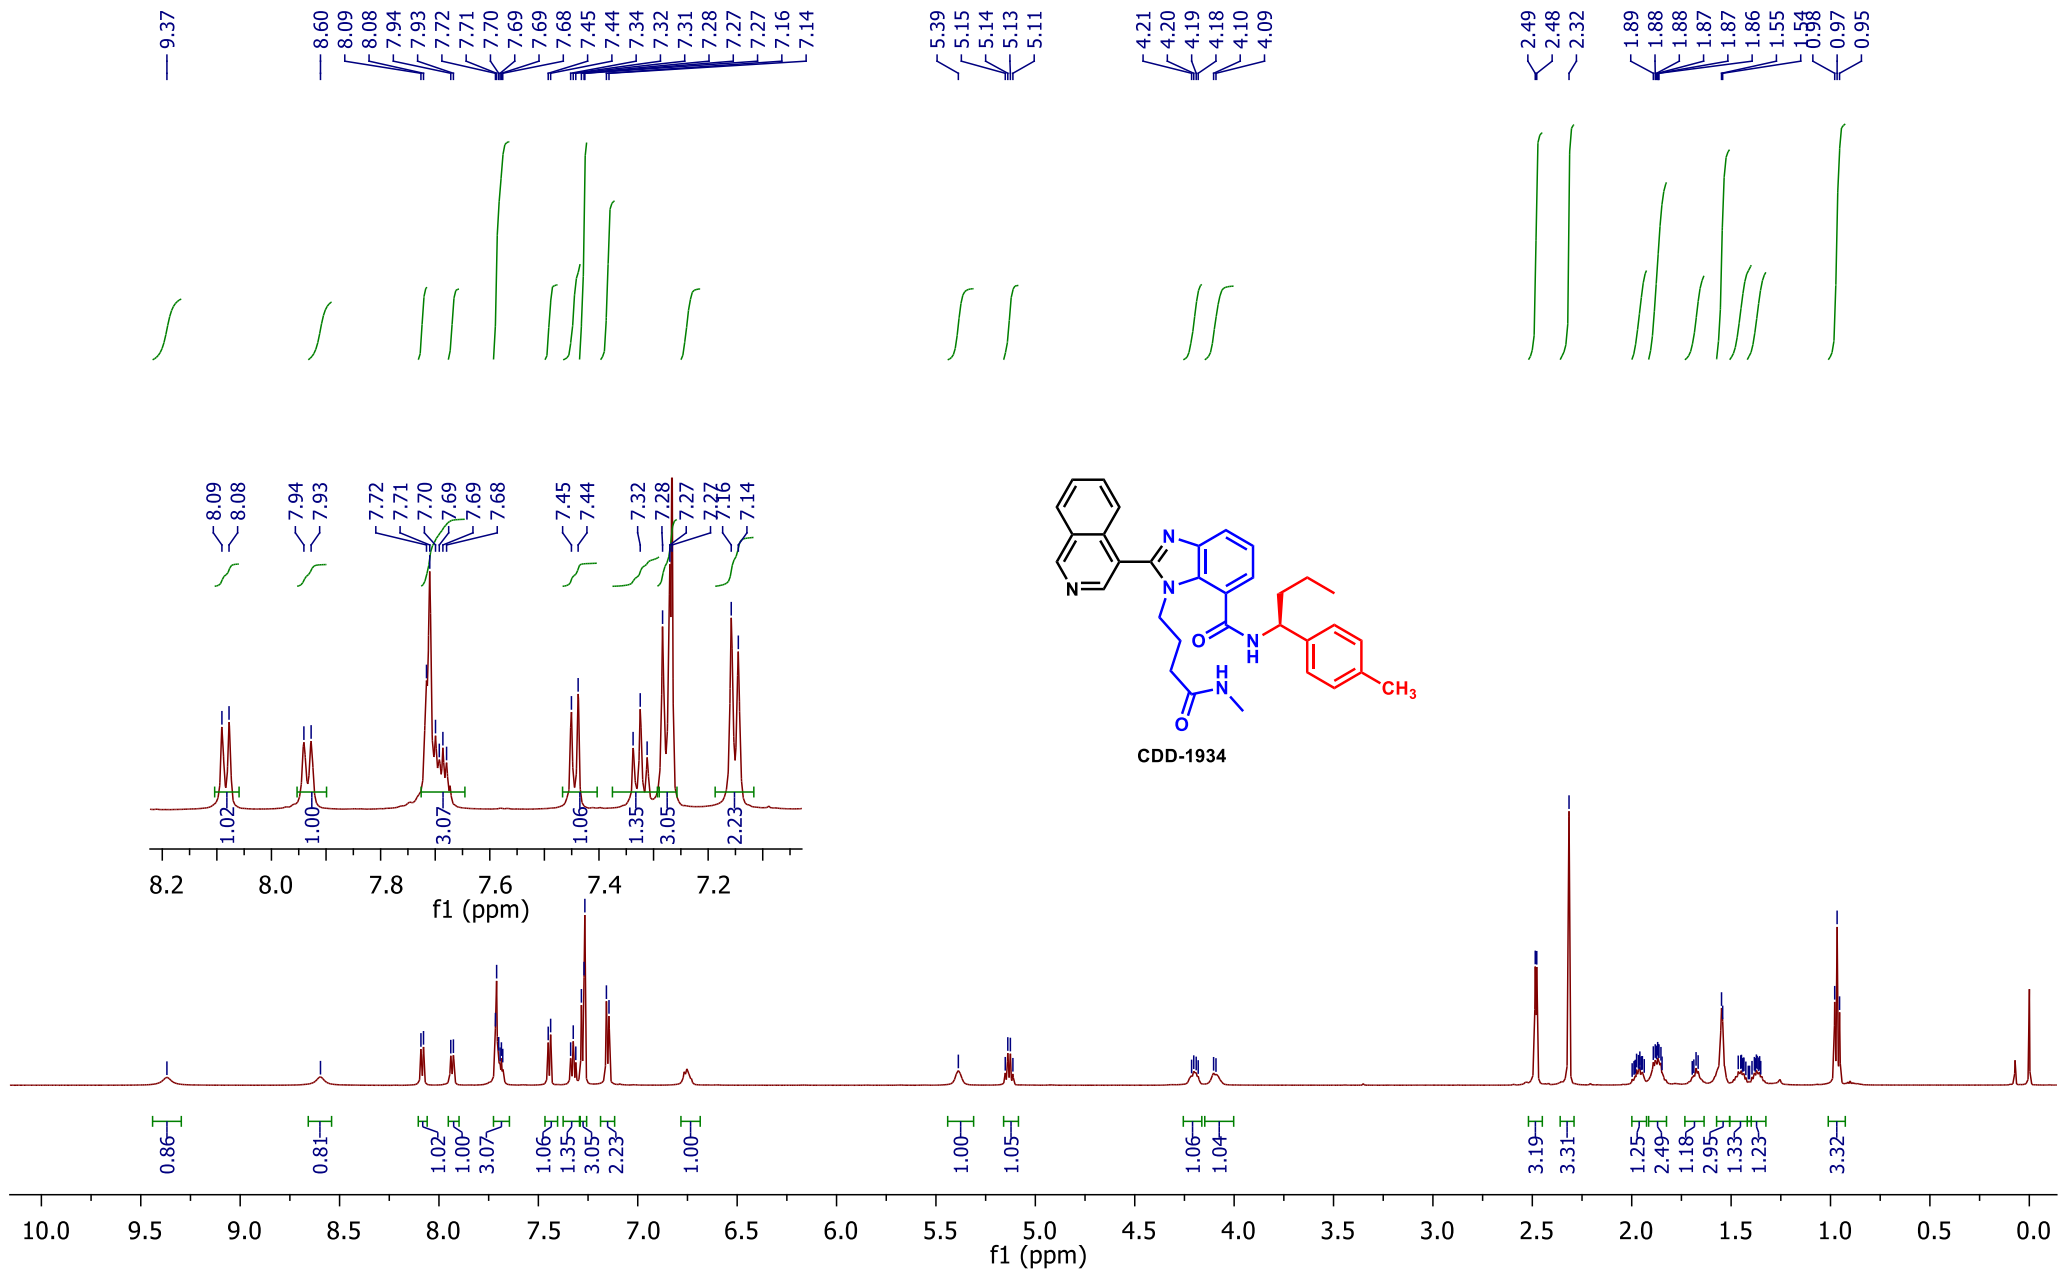

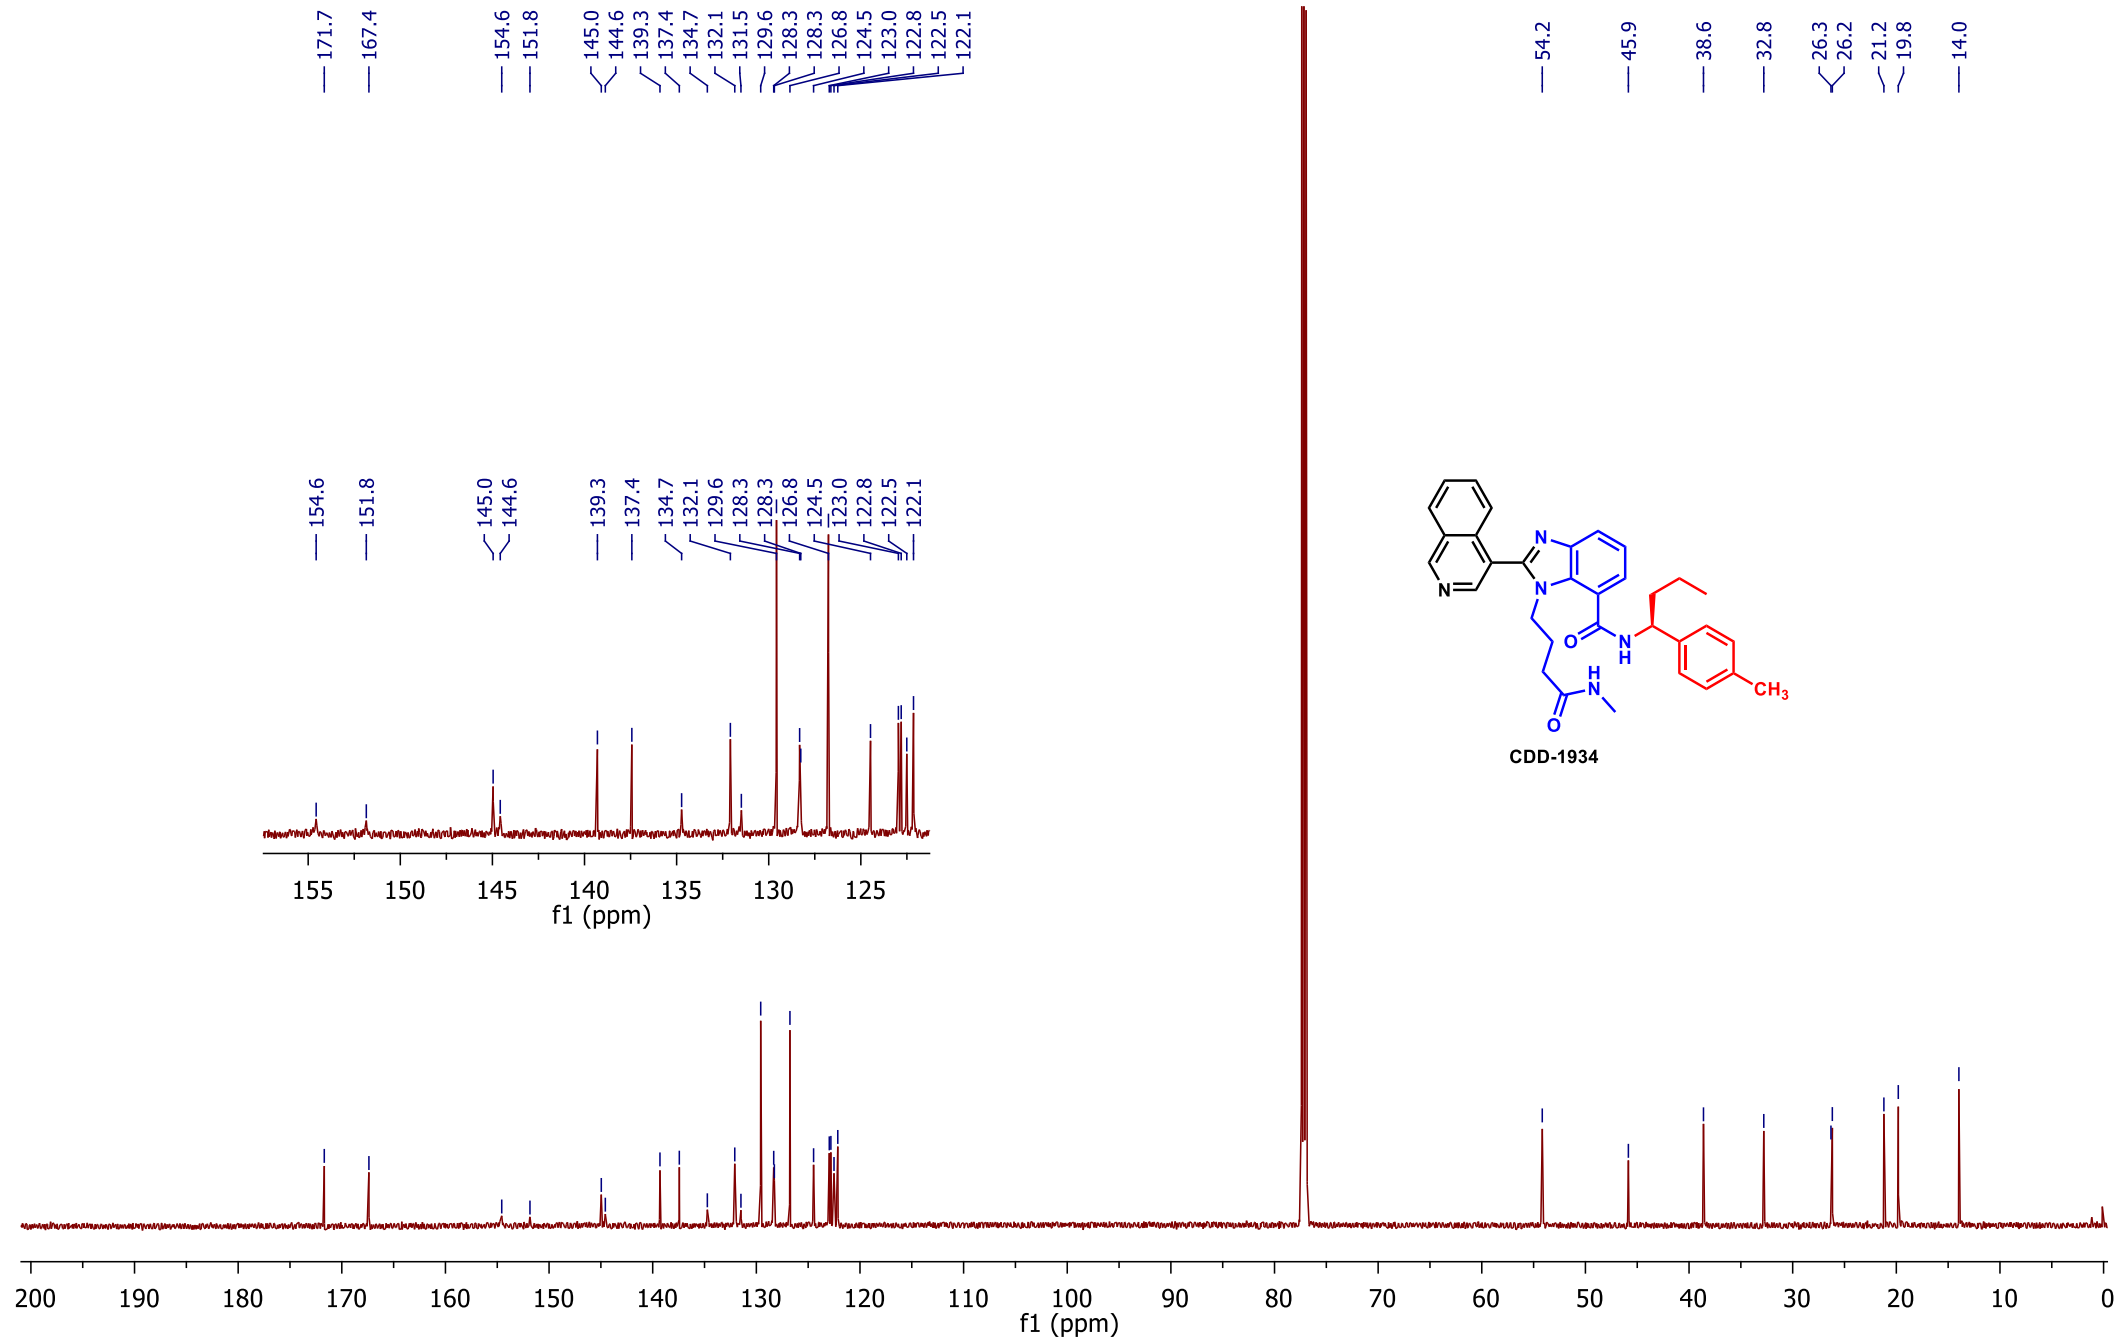

RT: 0.00 - 7.01

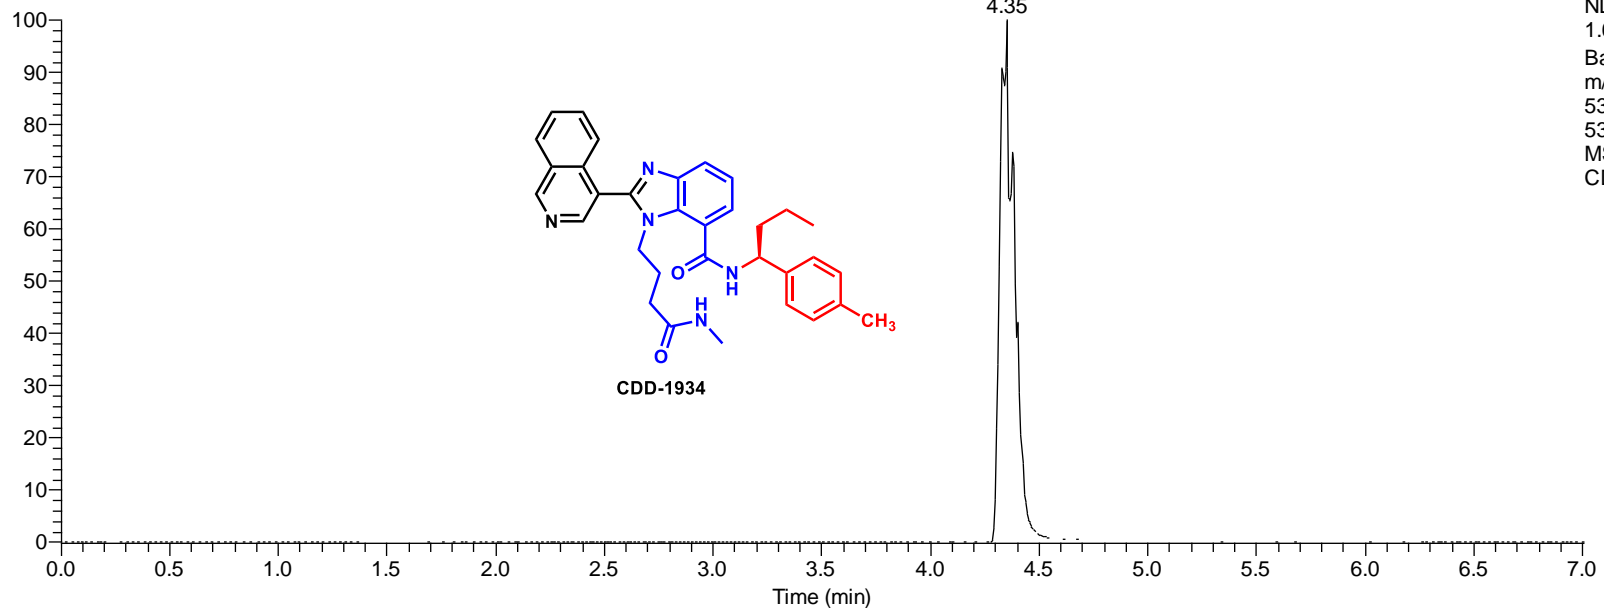

NL:  
1.66E9  
Base Peak  
m/z=  
533.7864-  
534.7864  
MS  
CDD1934

CDD1934 #545 RT: 4.35 AV: 1 NL: 1.61E9  
T: FTMS + p ESI Full ms [100.0000-1000.0000]

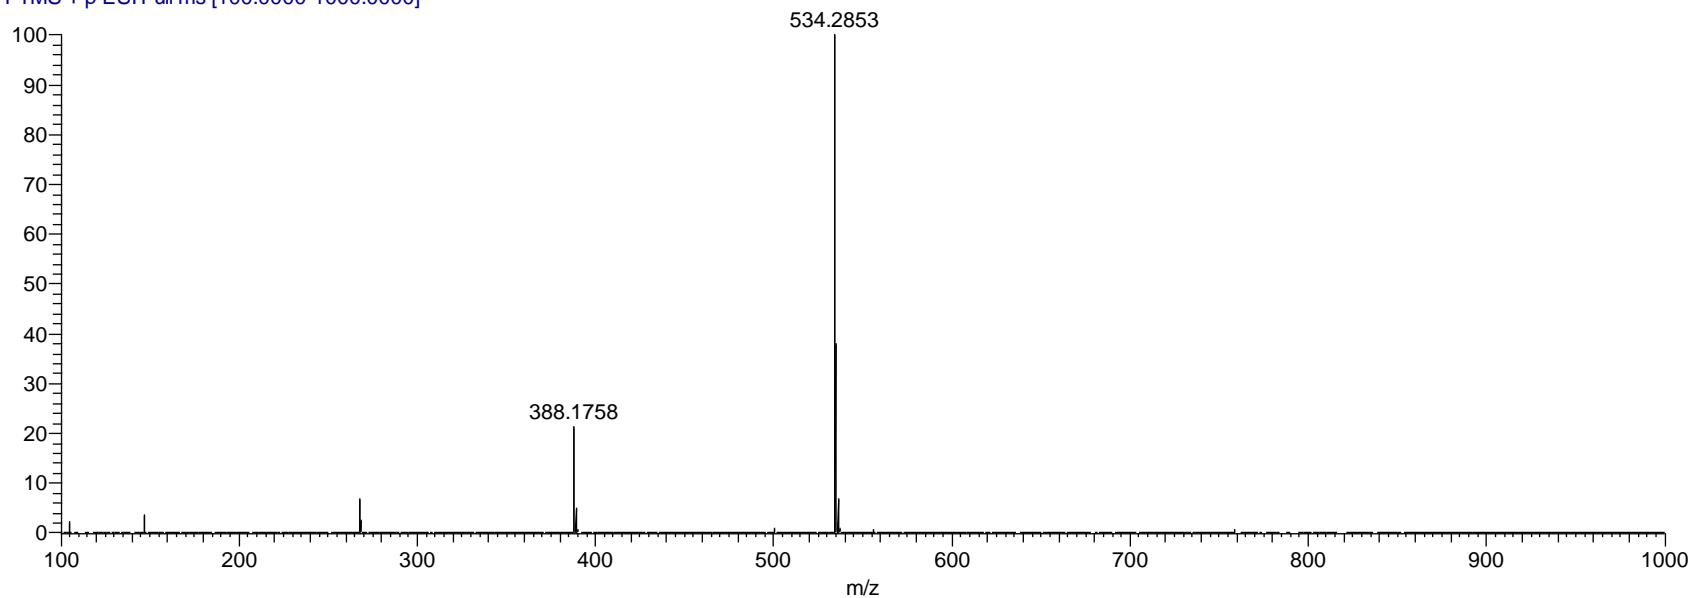

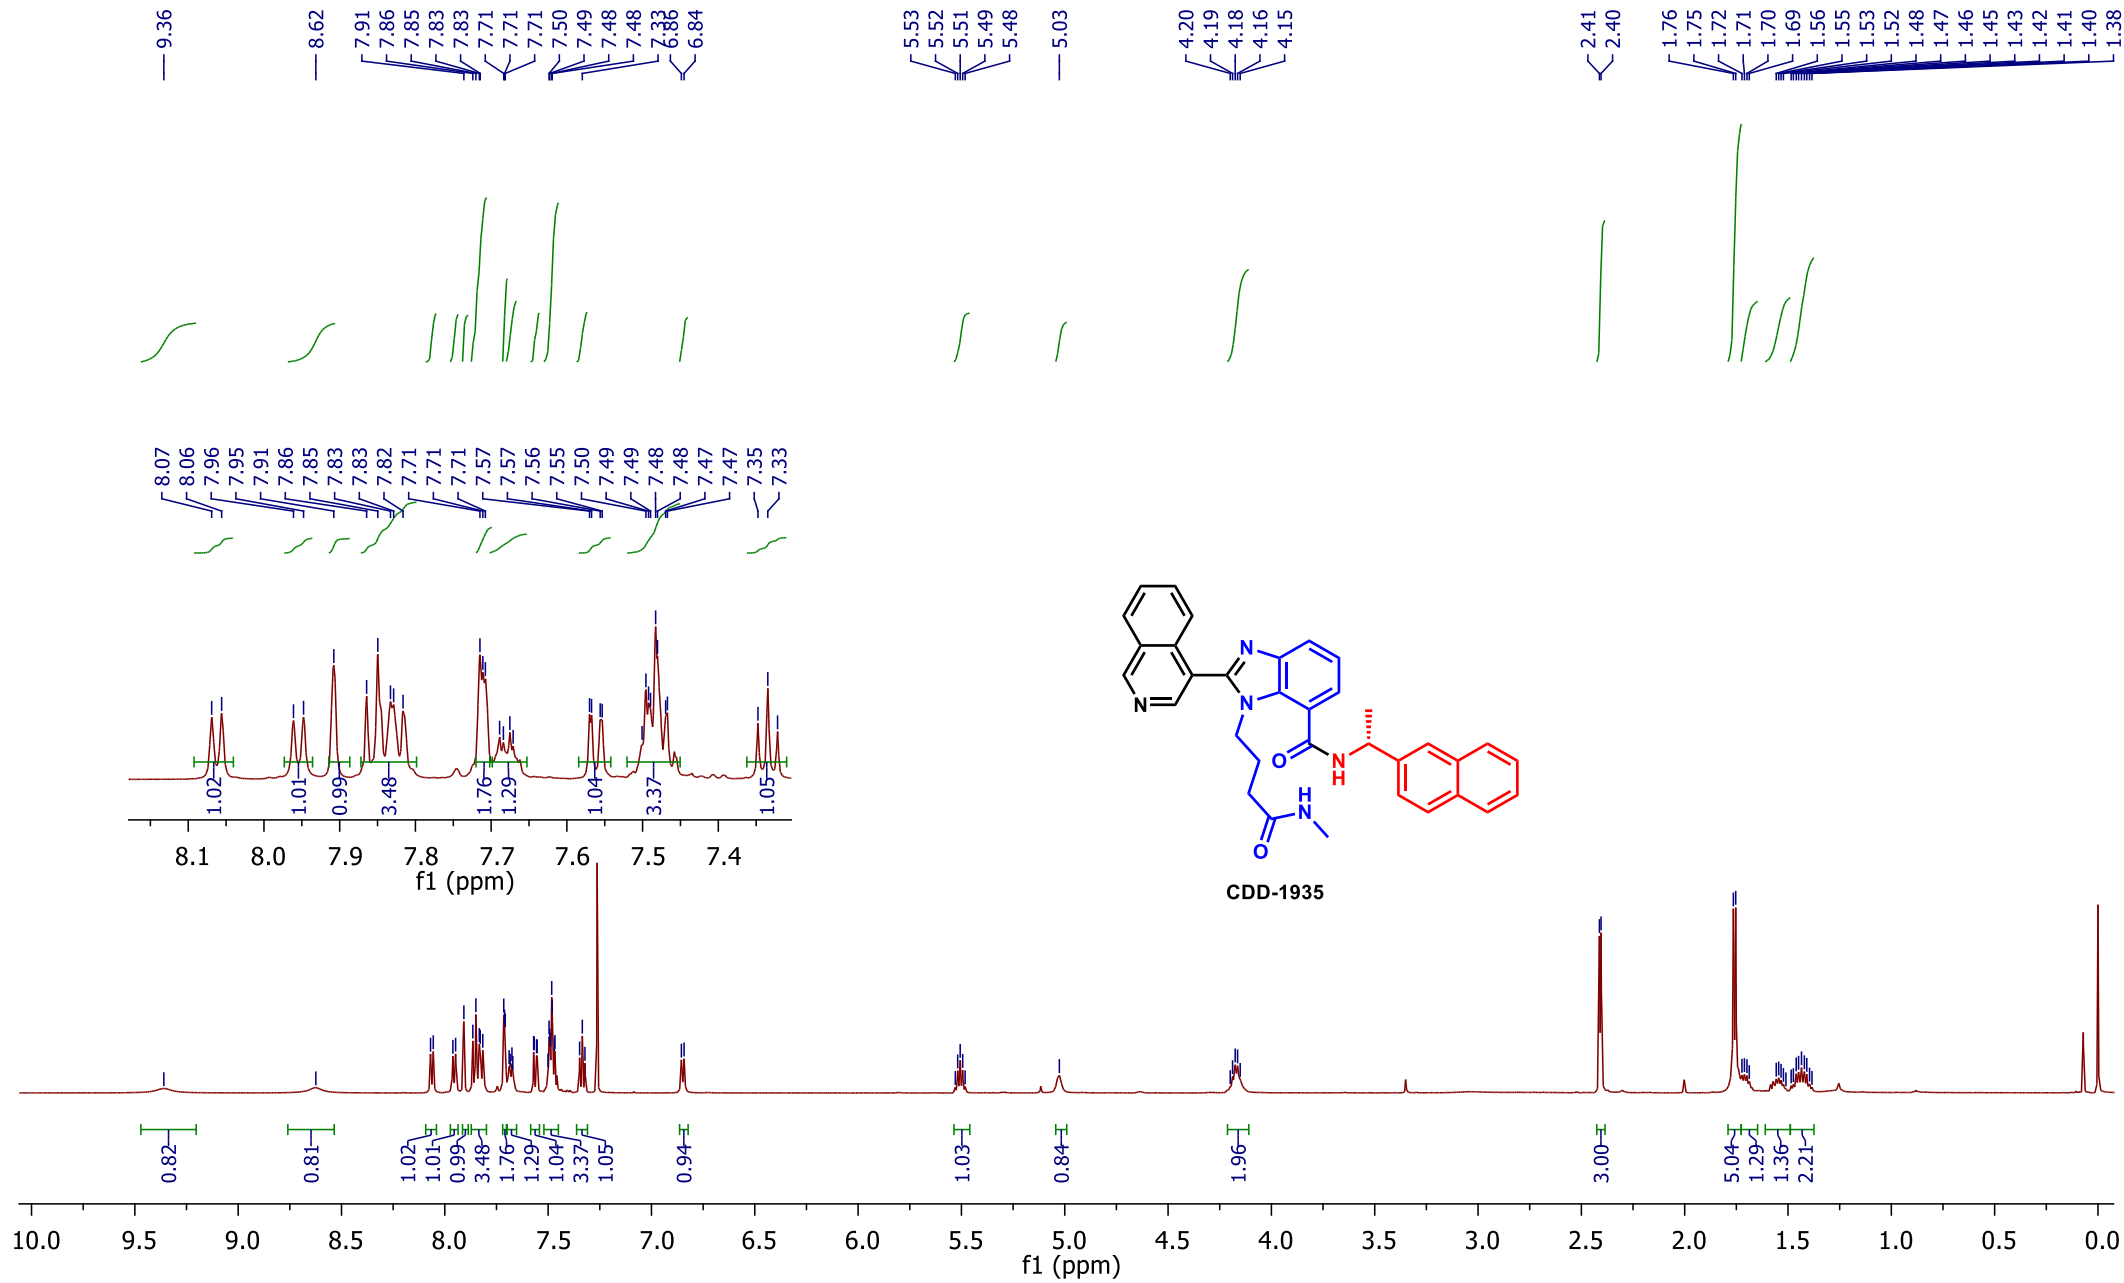

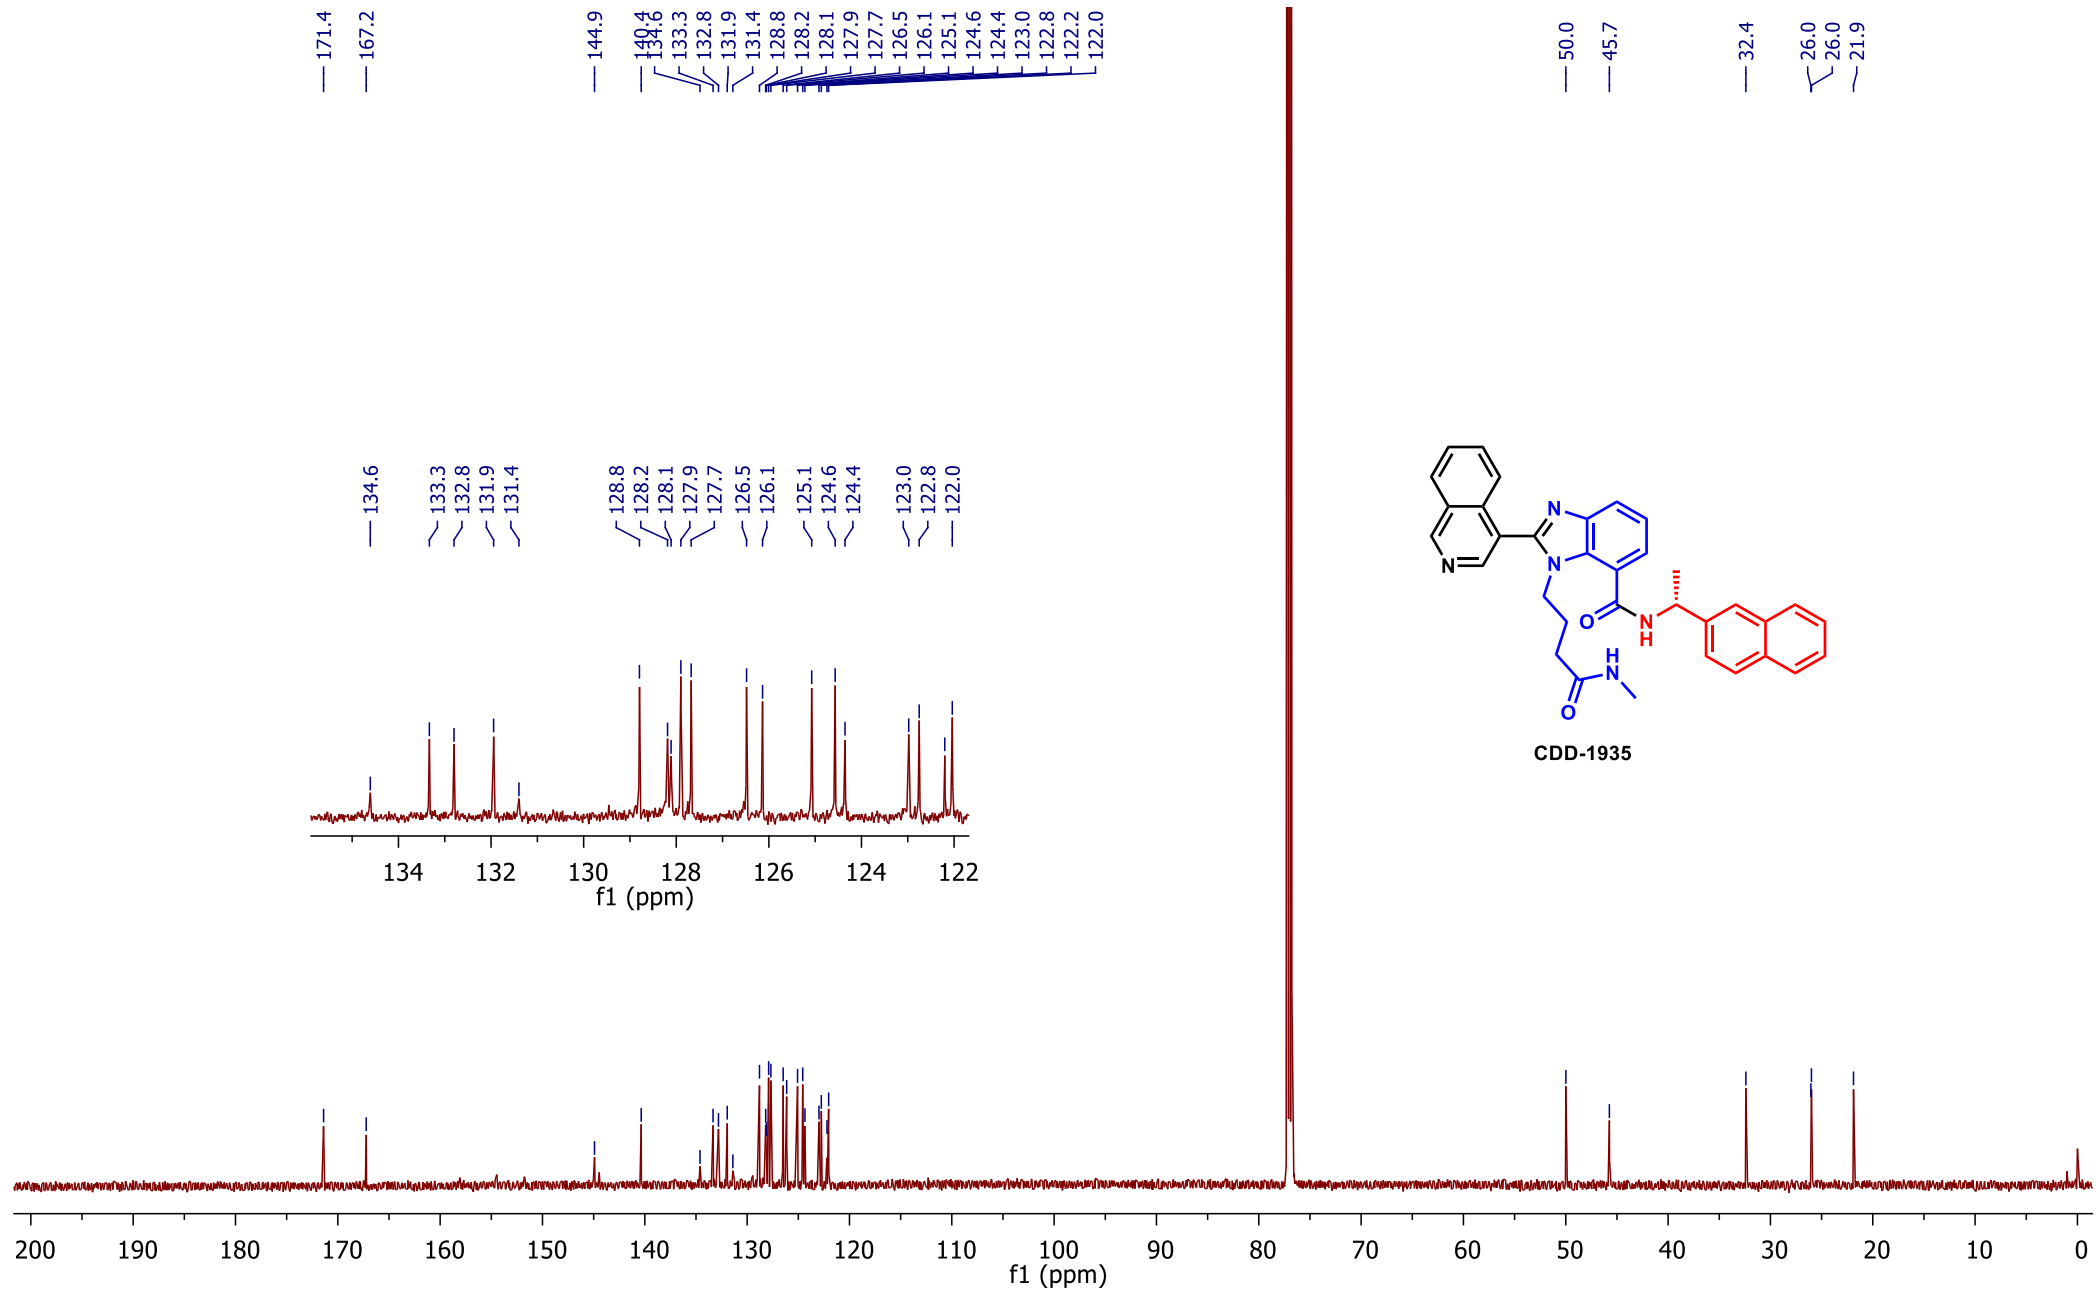

RT: 0.00 - 7.01

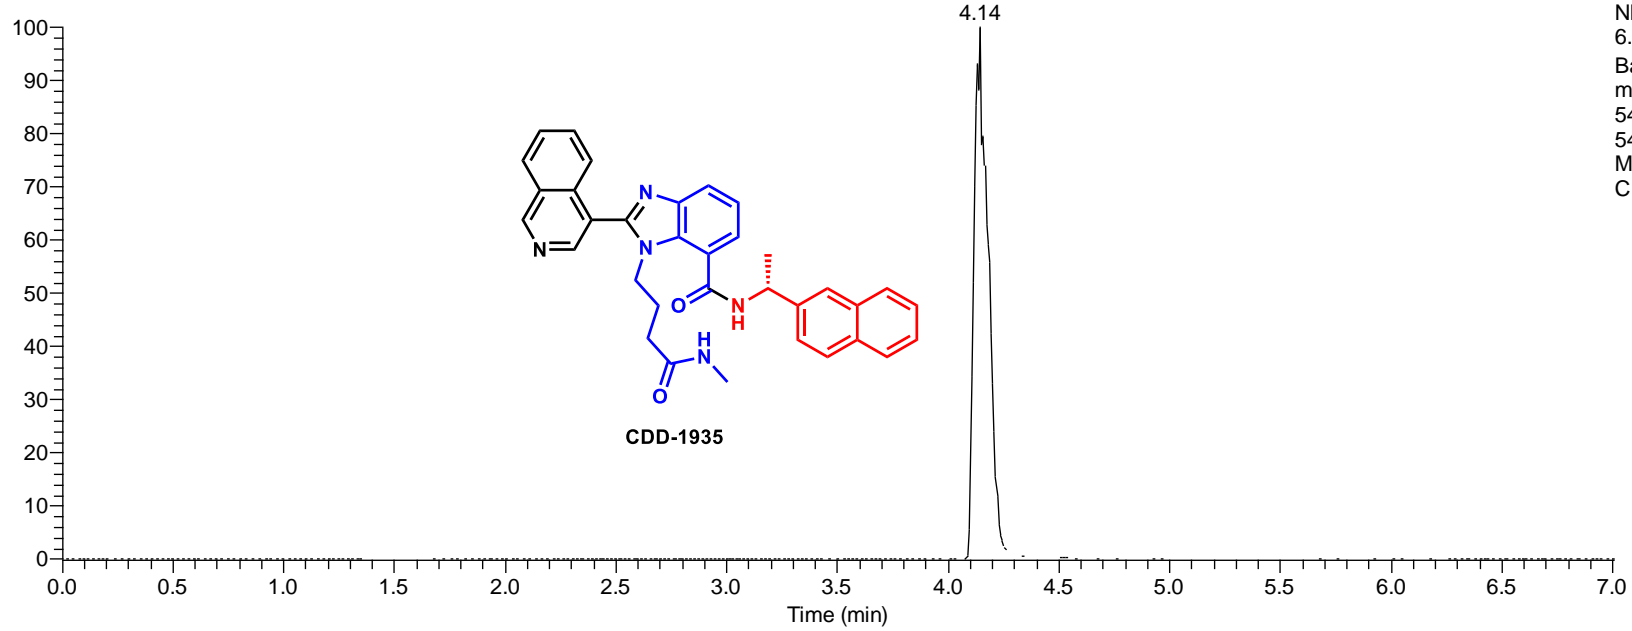

NL:  
6.86E8  
Base Peak  
m/z=  
541.7551-  
542.7551  
MS  
CDD1935

CDD1935 #508 RT: 4.14 AV: 1 NL: 6.76E8  
T: FTMS +p ESI Full ms [100.0000-1000.0000]

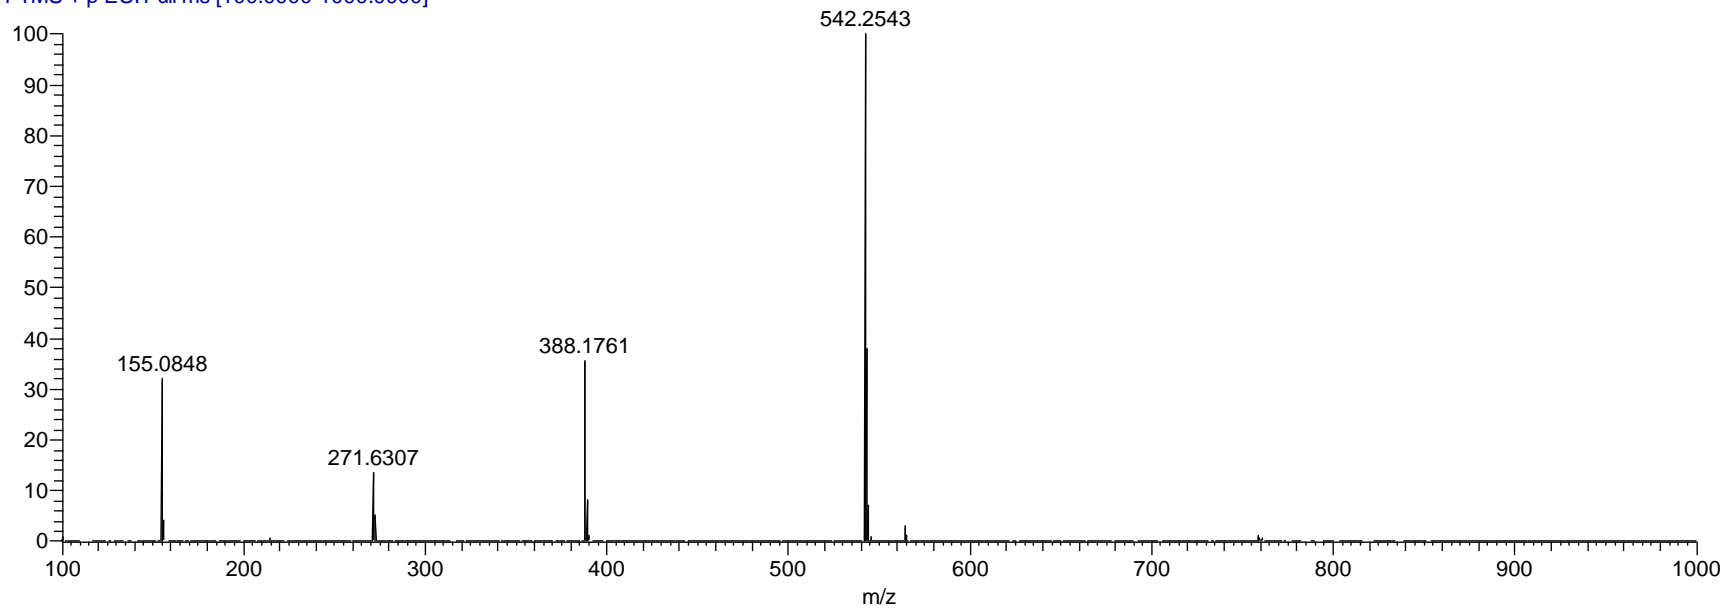



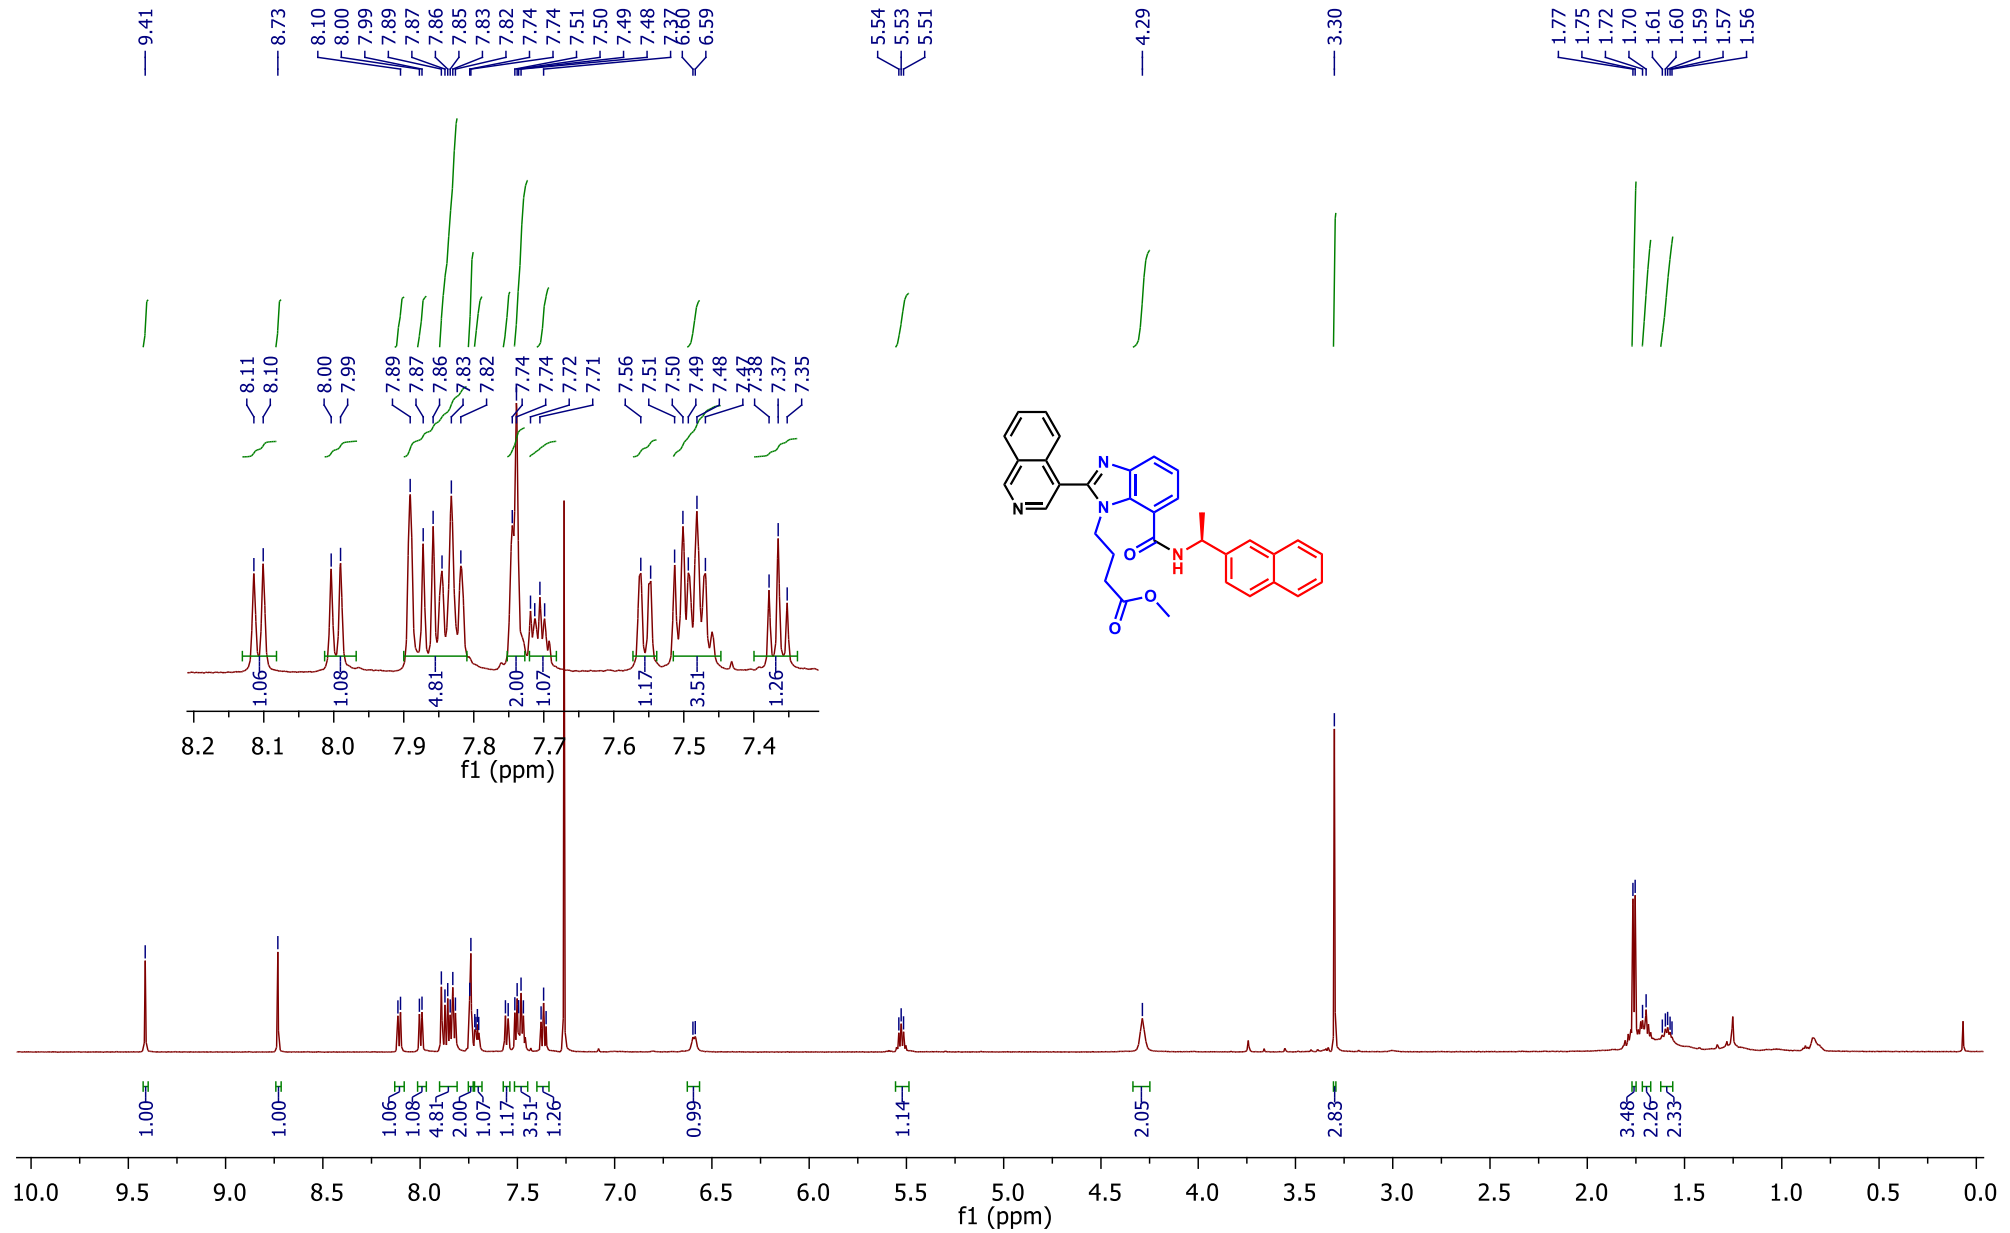

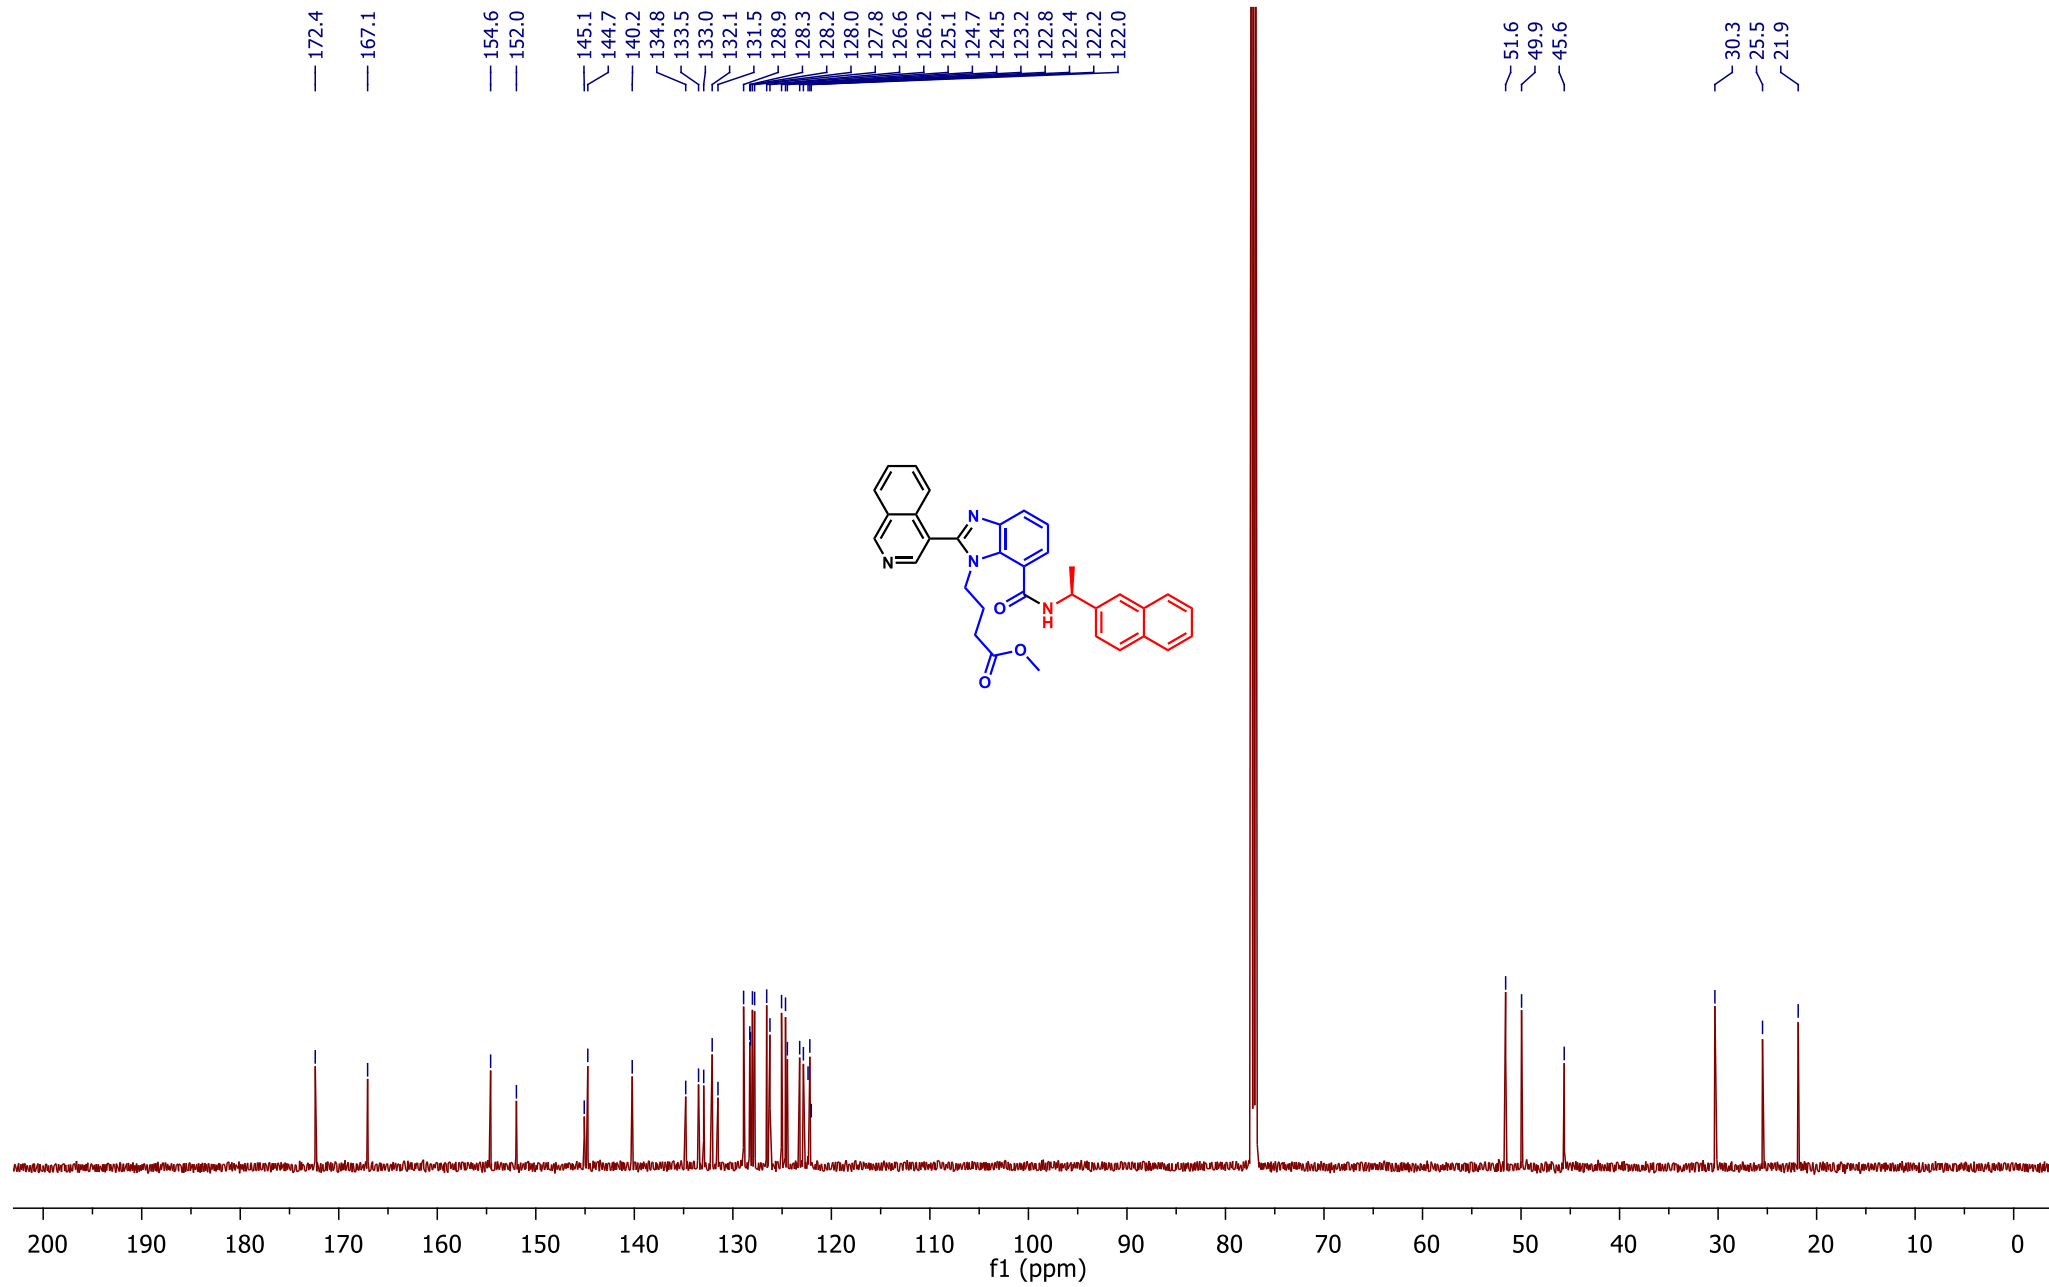

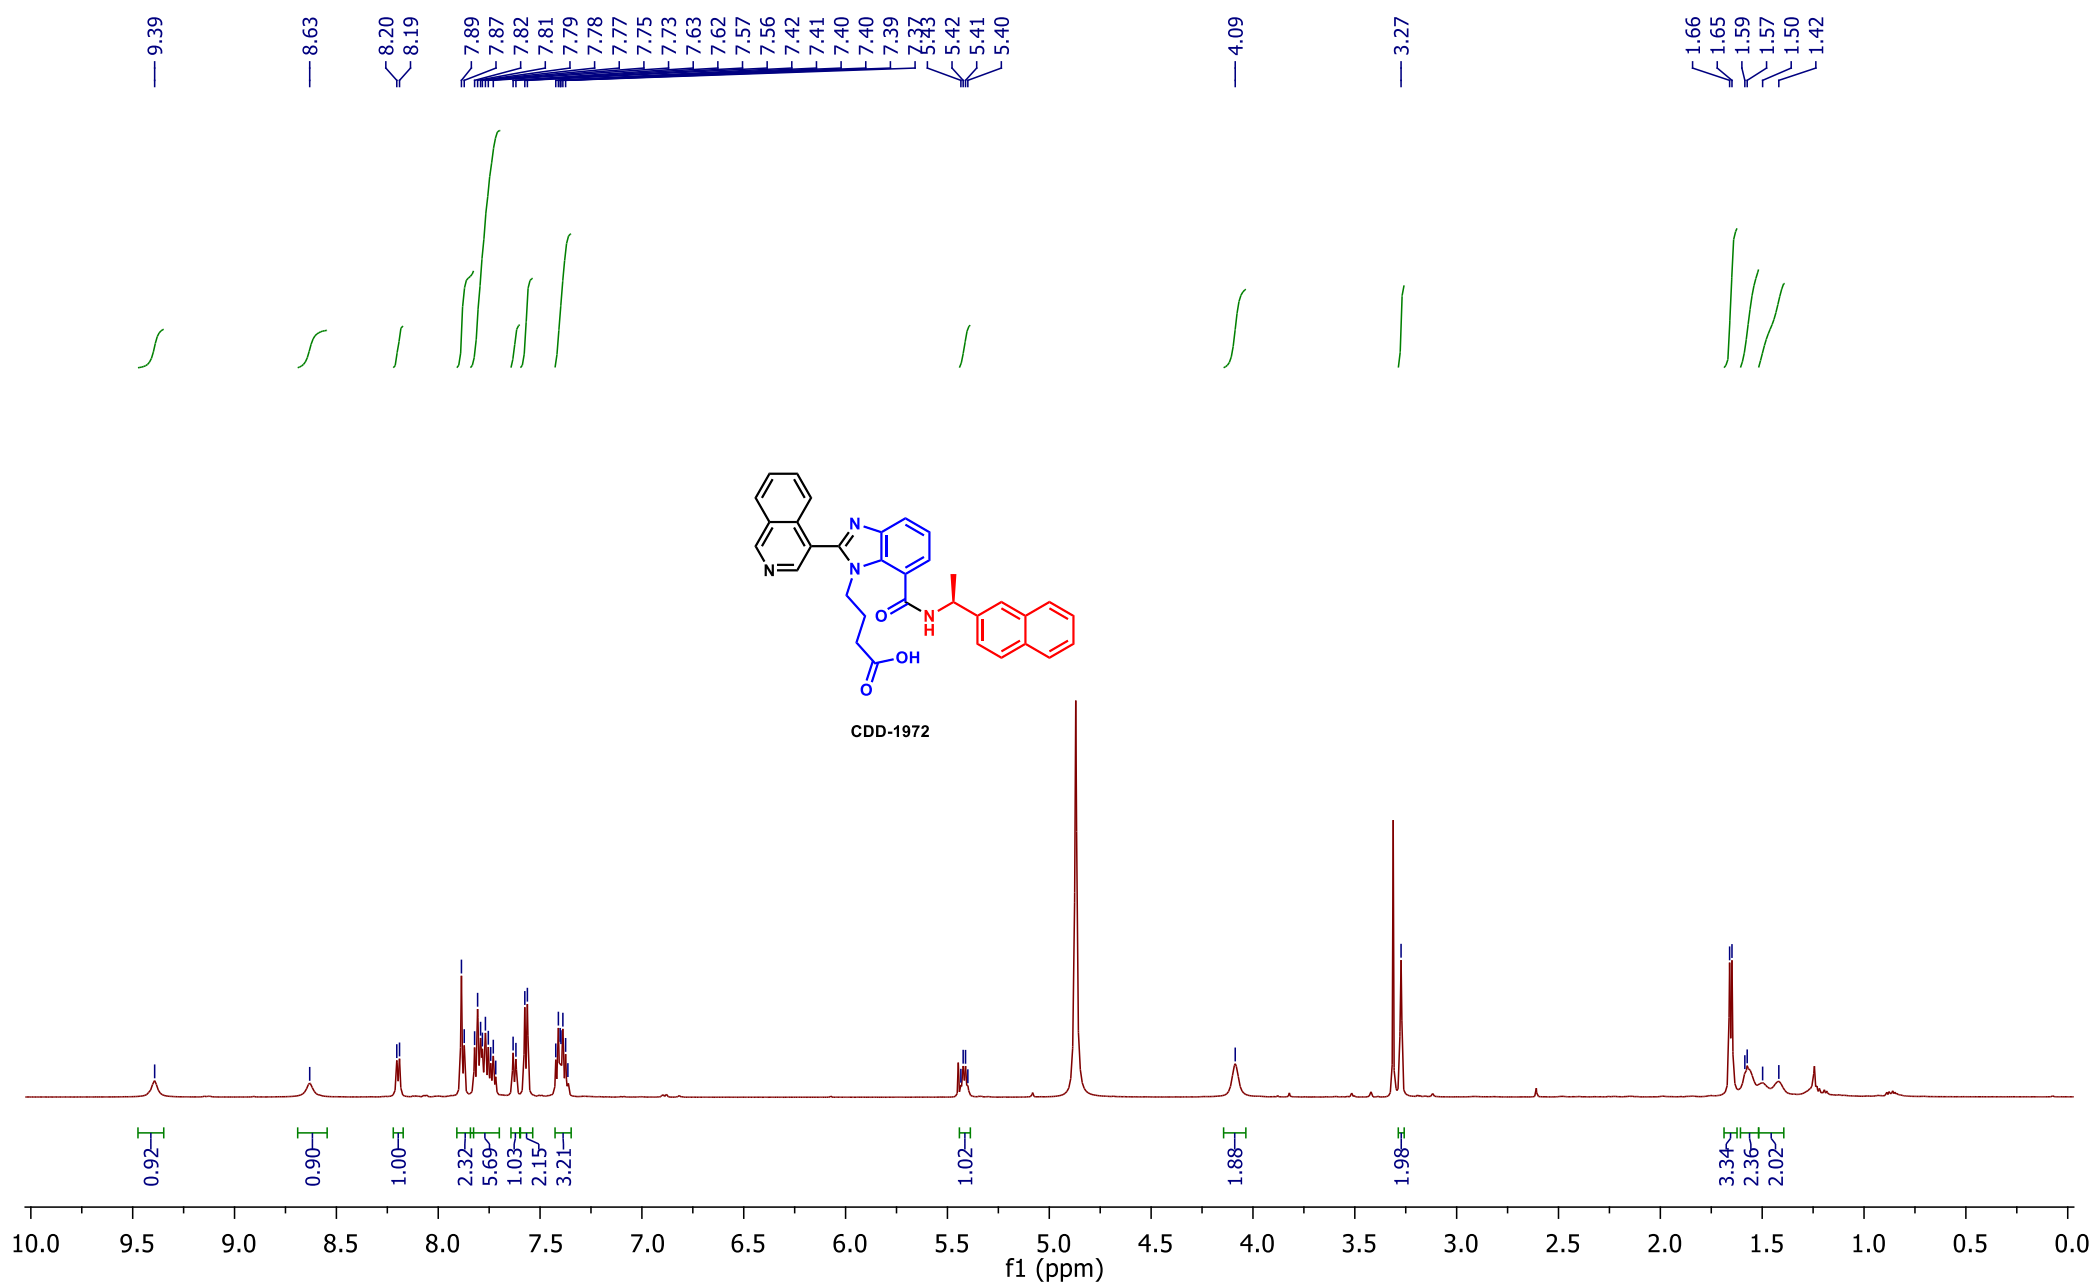

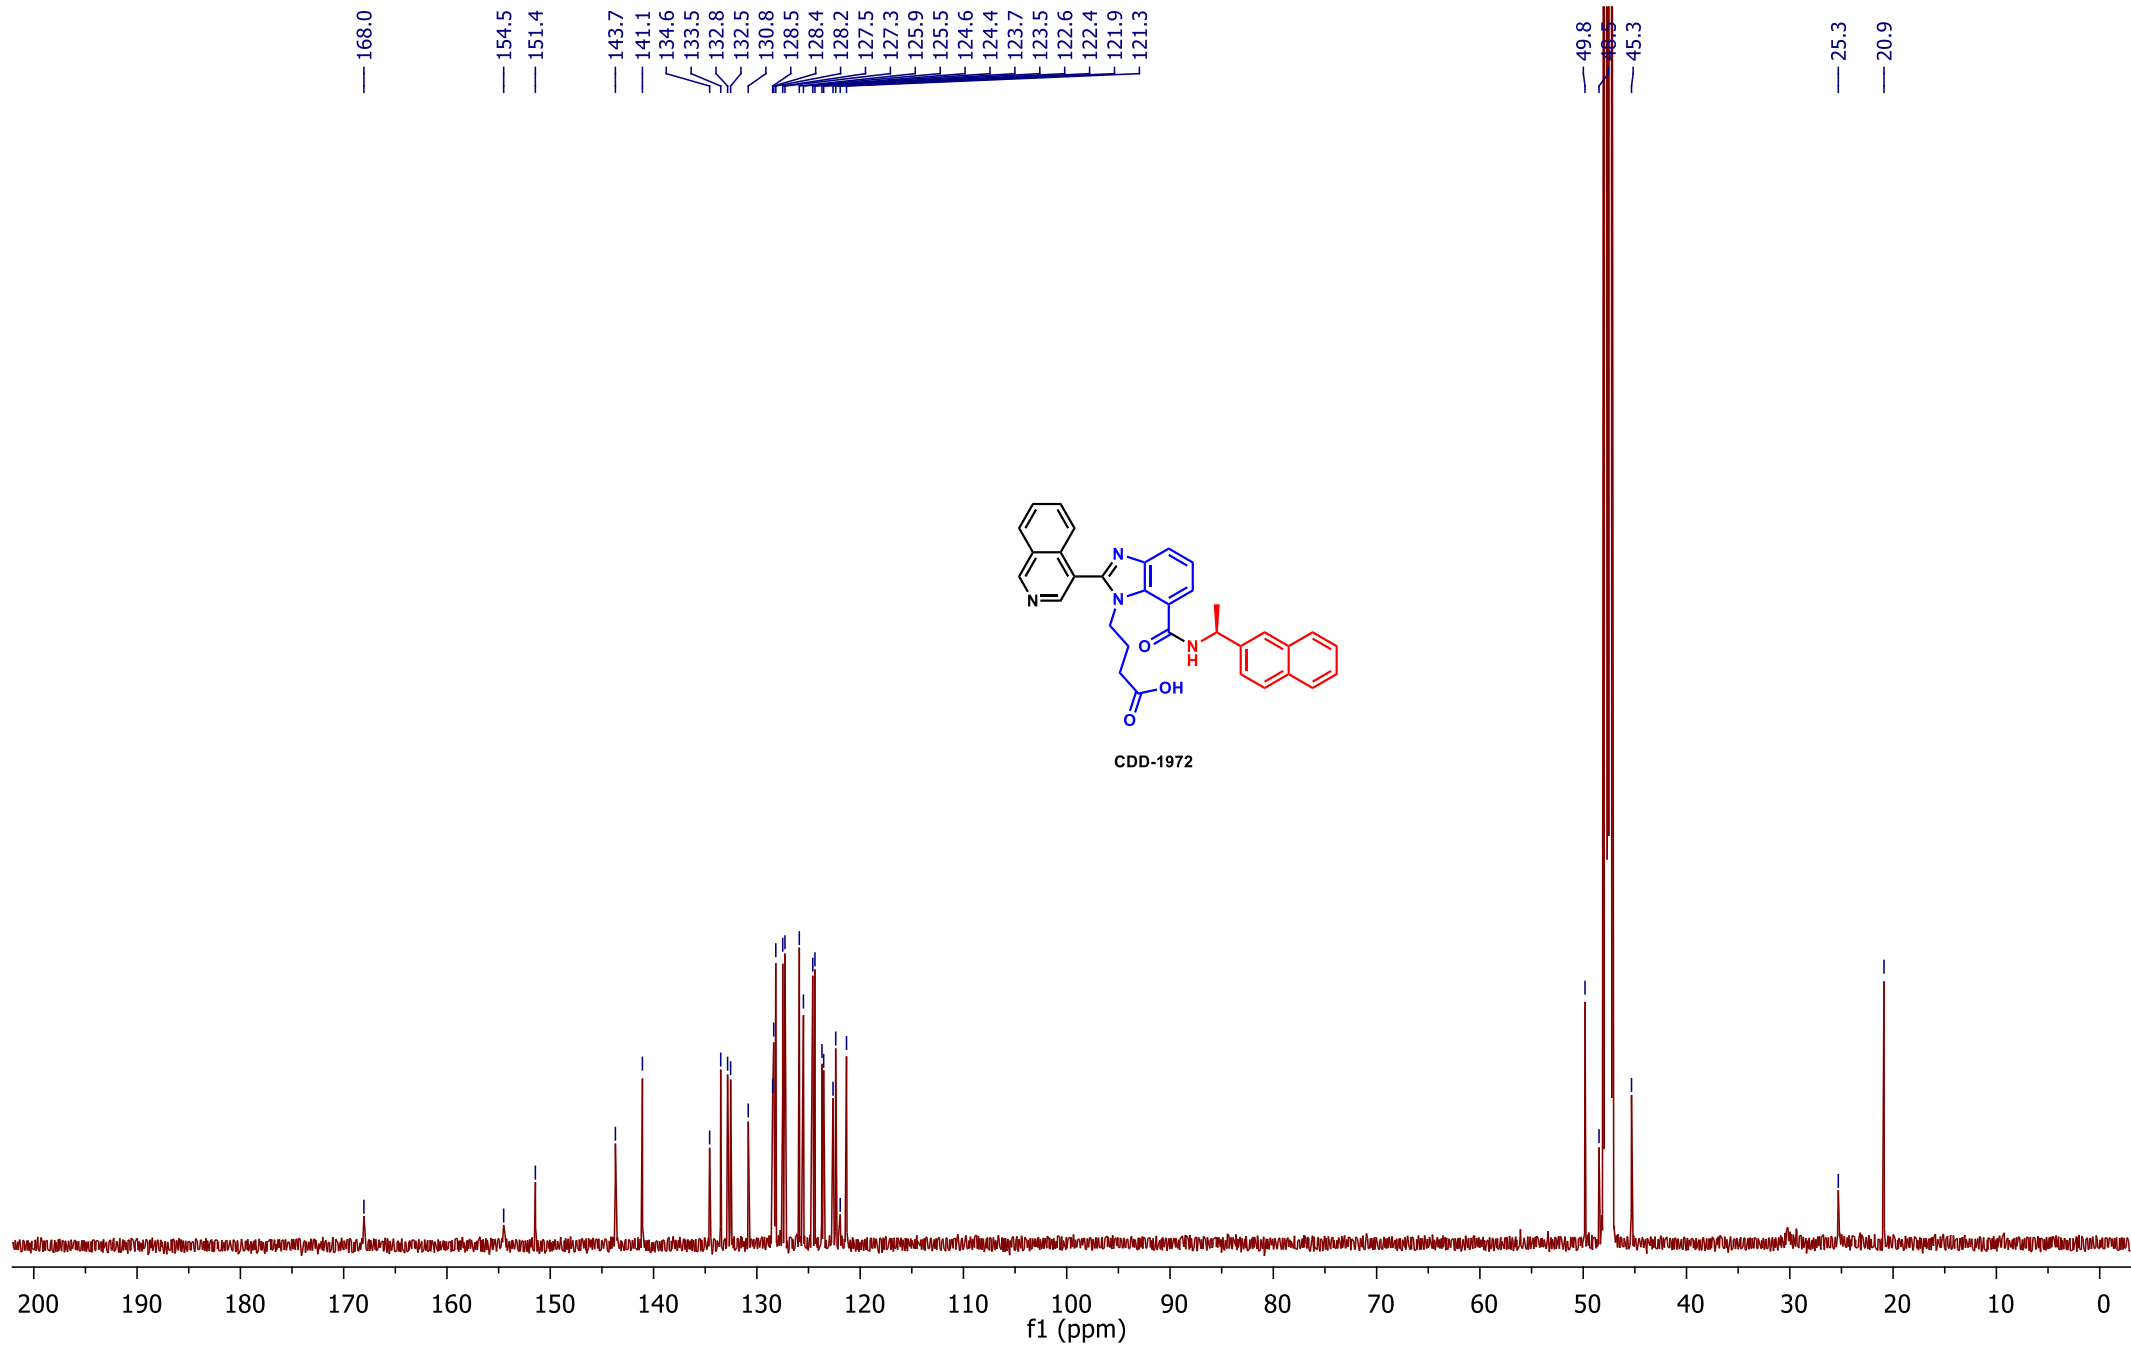

RT: 0.00 - 7.01

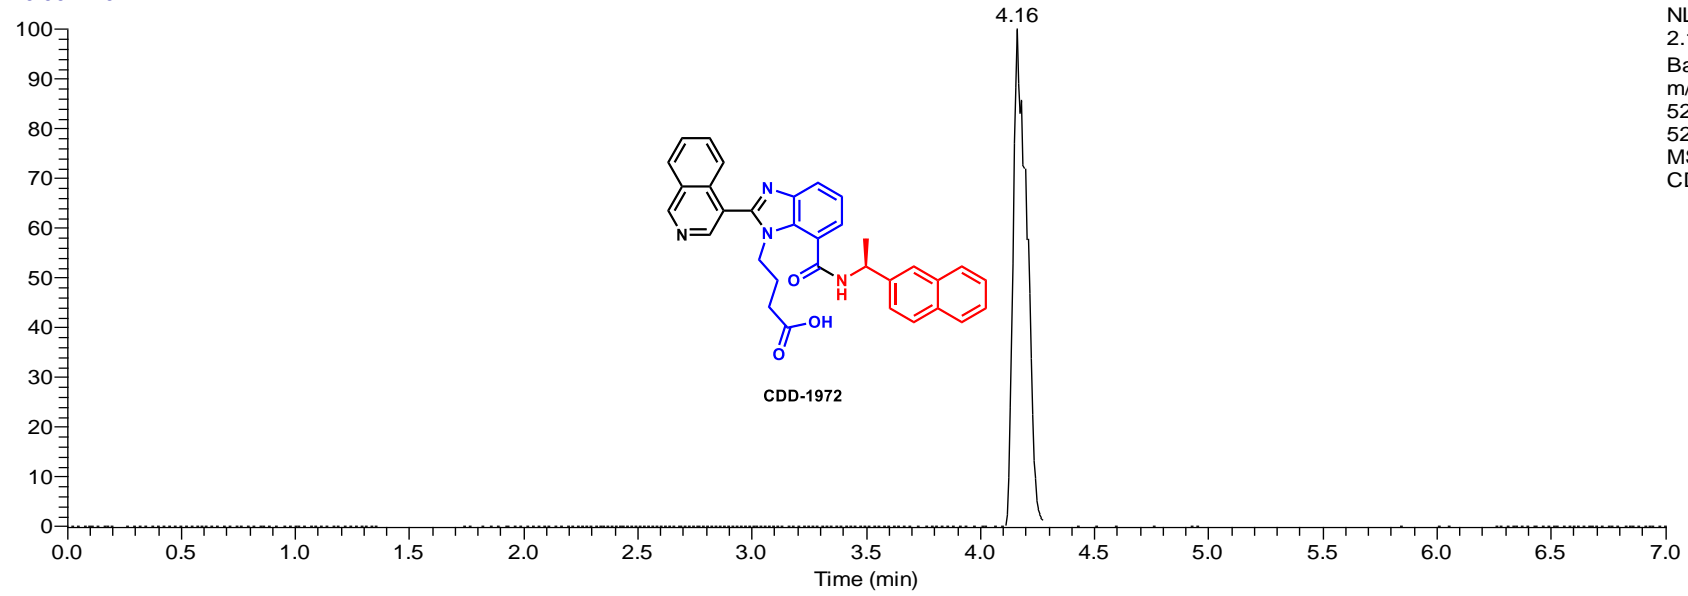

NL:  
2.19E9  
Base Peak  
m/z=  
528.7234-  
529.7234  
MS  
CDD1972

CDD1972 #513 RT: 4.16 AV: 1 NL: 2.18E9  
T: FTMS + p ESI Full ms [100.0000-1000.0000]

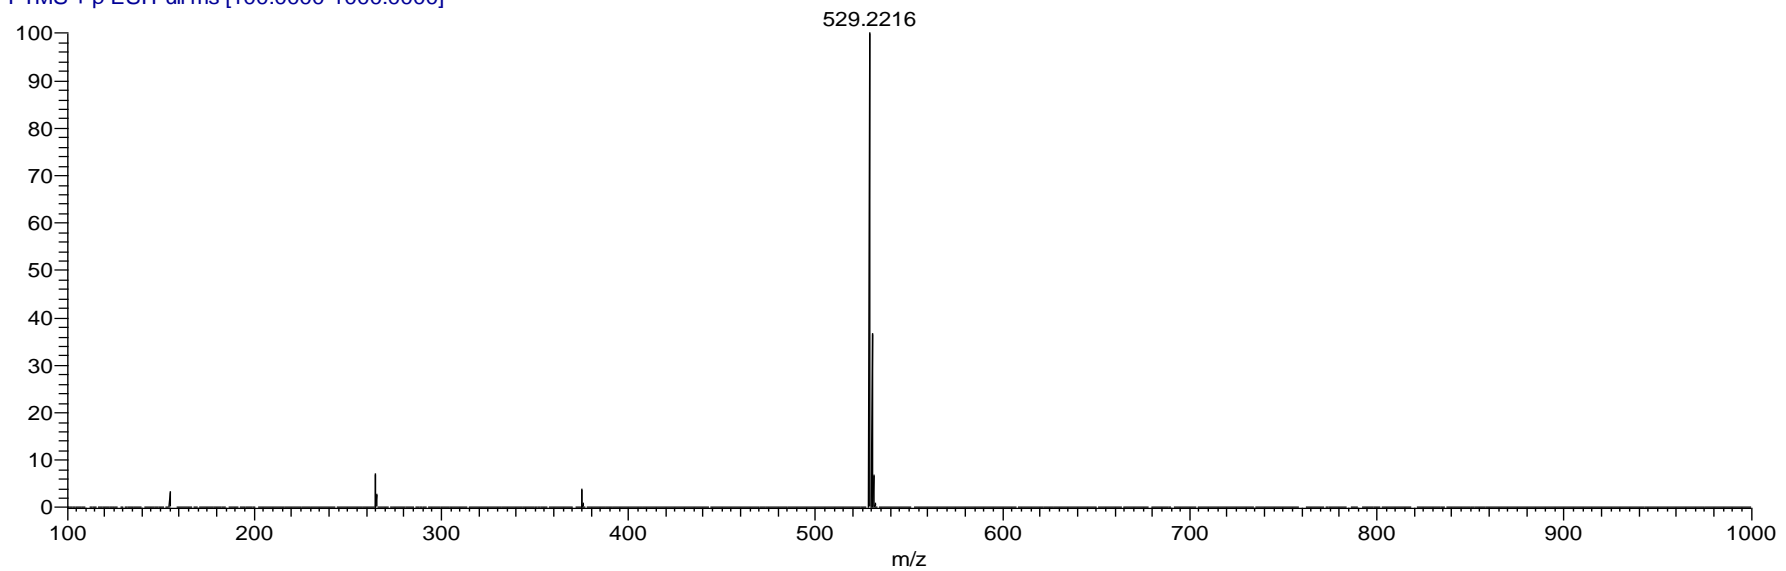

Supplement: 42004_2023_961_MOESM3_ESM.pdf [file 42004_2023_961_MOESM3_ESM.pdf]
