# Supplementary material for: DNA-encoded chemical libraries yield non-covalent and non-peptidic SARS-CoV-2 main protease inhibitors
Source: PubMed Central journal article supplement (PMC10403511; doi:10.1038/s42004-023-00961-y), 2023-08-04
Supplement: 42004_2023_961_MOESM2_ESM.pdf [file 42004_2023_961_MOESM2_ESM.pdf]

# Description of Additional Supplementary Files

**File name:** Supplementary Data 1

**Description:** Spectroscopic data for all newly synthesized small molecules.

**File name:** Supplementary Data 2

**Description:** Crystallography data of CDD-1733, CDD-1819, and CDD-1845.
