# Supplementary material for: DNA-encoded chemical libraries yield non-covalent and non-peptidic SARS-CoV-2 main protease inhibitors
Source: PubMed Central journal article supplement (PMC10403511; doi:10.1038/s42004-023-00961-y), 2023-08-04
Supplement: 42004_2023_961_MOESM4_ESM.pdf [file 42004_2023_961_MOESM4_ESM.pdf]

|                                                     | Mpro_CDD-1733<br>(7URB)       | Mpro_CDD-1819<br>(7US4)       | Mpro_CDD-1845<br>(7UR9)       |
|-----------------------------------------------------|-------------------------------|-------------------------------|-------------------------------|
| <b>Data collection</b>                              |                               |                               |                               |
| Space group                                         | C 1 2 1                       | C 1 2 1                       | P 21 21 21                    |
| Cell dimensions                                     |                               |                               |                               |
| <i>a, b, c</i> (Å)                                  | 96.21, 82.23, 54.67           | 96.71, 81.94, 54.55           | 67.72, 100.5, 104.5           |
| $\alpha, \beta, \gamma$ (°)                         | 90.00, 116.9, 90.00           | 90.00, 117.4, 90.00           | 90.00, 90.00, 90.00           |
| Resolution (Å)                                      | 31.44 – 2.14<br>(2.22 – 2.14) | 20.17 – 2.07<br>(2.14 – 2.07) | 58.63 – 2.16<br>(2.24 – 2.16) |
| <i>CC</i> <sub>1/2</sub>                            | 0.991 (0.803)                 | 0.998 (0.938)                 | 0.988 (0.918)                 |
| <i>I</i> / $\sigma$ <i>I</i>                        | 7.64 (2.07)                   | 14.43 (4.88)                  | 8.44 (4.40)                   |
| Completeness (%)                                    | 91.32 (90.32)                 | 99.85 (100.0)                 | 99.95 (99.70)                 |
| Redundancy                                          | 4.9 (4.9)                     | 4.7 (4.8)                     | 5.8 (5.9)                     |
| <b>Refinement</b>                                   |                               |                               |                               |
| Resolution (Å)                                      | 31.44 – 2.14<br>(2.22 – 2.14) | 20.17 – 2.07<br>(2.14 – 2.07) | 58.63 – 2.16<br>(2.24 – 2.16) |
| No. reflections                                     | 19210 (1885)                  | 23075 (2289)                  | 38932 (3828)                  |
| <i>R</i> <sub>work</sub> / <i>R</i> <sub>free</sub> | 0.2004 / 0.2540               | 0.1809 / 0.2351               | 0.1606 / 0.1999               |
| No. atoms                                           |                               |                               |                               |
| Protein                                             | 2348                          | 2339                          | 4748                          |
| Ligand/ion                                          | 44                            | 42                            | 82                            |
| Water                                               | 173                           | 253                           | 533                           |
| <i>B</i> -factors                                   |                               |                               |                               |
| Protein                                             | 26.11                         | 26.58                         | 25.85                         |
| Ligand/ion                                          | 30.81                         | 25.58                         | 25.15                         |
| Water                                               | 29.78                         | 33.93                         | 32.85                         |
| R.m.s. deviations                                   |                               |                               |                               |
| Bond lengths (Å)                                    | 0.303                         | 0.206                         | 0.007                         |
| Bond angles (°)                                     | 5.72                          | 2.64                          | 0.85                          |

\*Values in parentheses are for highest-resolution shell.
